# Supplementary material for: Harnessing affinity-based protein profiling to reveal a novel target of nintedanib
Source: Royal Society of Chemistry journal article supplement (doi:10.1039/d1cc00354b), 2021-01-01
Supplement: d1cc00354b1.xlsx [file d1cc00354b1.xlsx]

## Sheet: Sheet1
Supplementary Excel S1: LC-MS/MS Data for Chemoproteomic Profiling
											Normalized abundance																		Raw abundance
											Control Group Total proteins count:1033						Competition Group Total proteins count:1064						Probe Group Total proteins count:1044						Control Group						Competition Group						Probe Group
Accession	Peptide count	Unique peptides	Confidence score	Anova (p)	q Value	Max fold change	Power	Highest mean condition	Lowest mean condition	Description	Bead-Cont_1-1	Bead-Cont_1-Rep_2	Bead-Cont_2	Bead-Cont_2-Rep_2	Bead-Cont_3	Bead-Cont_3-Rep_2	Bead-CP3_1	Bead-CP3_1-Rep_2	Bead-CP3_2	Bead-CP3_2-Rep_2	Bead-CP3_3	Bead-CP3_3-Rep_2	Bead-P3_1	Bead-P3_1-Rep_2	Bead-P3_2	Bead-P3_2-Rep_2	Bead-P3_3	Bead-P3_3-Rep_2	Bead-Cont_1-1	Bead-Cont_1-Rep_2	Bead-Cont_2	Bead-Cont_2-Rep_2	Bead-Cont_3	Bead-Cont_3-Rep_2	Bead-CP3_1	Bead-CP3_1-Rep_2	Bead-CP3_2	Bead-CP3_2-Rep_2	Bead-CP3_3	Bead-CP3_3-Rep_2	Bead-P3_1	Bead-P3_1-Rep_2	Bead-P3_2	Bead-P3_2-Rep_2	Bead-P3_3	Bead-P3_3-Rep_2
A0A1B0GVD5|A0A1B0GVD5_HUMAN;A0A1B0GVP3|A0A1B0GVP3_HUMAN;A0A1B0GV23|A0A1B0GV23_HUMAN;A0A1B0GU03|A0A1B0GU03_HUMAN;H7C469|H7C469_HUMAN;C9JH19|C9JH19_HUMAN;F8WD96|F8WD96_HUMAN;H7C1V0|H7C1V0_HUMAN;F8W787|F8W787_HUMAN;A0A1B0GV01|A0A1B0GV01_HUMAN;A0A1B0GVF1|A0A1B0GVF1_HUMAN	16	16	1274.87	3.13993e-12	7.55265e-10	217.845	1	Probe	Control	A0A1B0GVD5	297702	211787	277634	211579	160317	105122	7.64463e+06	5.05312e+06	1.38365e+07	2.11603e+07	1.49256e+07	1.19419e+07	5.35507e+07	6.2279e+07	5.29073e+07	5.45027e+07	2.61916e+07	2.59554e+07	241097	269602	211805	278953	150524	182289	9.45517e+06	1.03423e+07	2.26634e+07	6.66799e+07	2.33248e+07	3.1011e+07	4.77582e+07	1.19645e+08	5.29073e+07	9.20626e+07	2.73872e+07	4.9206e+07
P21796|VDAC1_HUMAN;C9JI87|C9JI87_HUMAN	22	21	2429.62	3.27902e-10	3.9436e-08	42.9464	1	Competition	Control	P21796	2.17251e+06	1.31849e+06	1.69867e+06	2.55235e+06	1.69422e+06	1.86928e+06	4.4762e+07	4.92952e+07	7.17856e+07	9.07033e+07	1.24066e+08	1.0492e+08	3.22473e+07	3.17845e+07	1.5117e+07	1.94939e+07	9.02612e+06	1.24122e+07	1.75943e+06	1.67842e+06	1.29591e+06	3.36511e+06	1.59072e+06	3.24149e+06	5.53634e+07	1.00893e+08	1.17581e+08	2.85823e+08	1.93883e+08	2.72458e+08	2.87592e+07	6.10615e+07	1.5117e+07	3.29279e+07	9.43816e+06	2.35309e+07
P07858|CATB_HUMAN;R4GMQ5|R4GMQ5_HUMAN;E9PCB3|E9PCB3_HUMAN	5	5	356.13	1.08916e-09	8.73273e-08	18.8318	1	Probe	Control	P07858	106467	111035	84729	88782.6	100379	75547.6	521176	318080	1.35741e+06	655911	1.08916e+06	624043	2.2028e+06	1.51856e+06	2.54703e+06	1.42835e+06	1.68796e+06	1.29181e+06	86223.6	141346	64639.1	117054	94247	131006	644611	651019	2.22336e+06	2.0669e+06	1.70208e+06	1.62053e+06	1.96453e+06	2.91733e+06	2.54703e+06	2.41269e+06	1.76501e+06	2.44901e+06
P11021|BIP_HUMAN;O95399|UTS2_HUMAN	30	26	1974.65	3.67322e-09	2.20885e-07	11.6807	1	Competition	Control	P11021	1.51539e+06	1.04223e+06	1.33025e+06	949763	1.09915e+06	1.1905e+06	1.12992e+07	6.9556e+06	1.42417e+07	8.49206e+06	2.11952e+07	2.10677e+07	4.99908e+06	3.94919e+06	3.64847e+06	2.9219e+06	3.36244e+06	3.32858e+06	1.22726e+06	1.32674e+06	1.01484e+06	1.2522e+06	1.032e+06	2.06443e+06	1.39753e+07	1.42361e+07	2.33272e+07	2.676e+07	3.31226e+07	5.47091e+07	4.45834e+06	7.58682e+06	3.64847e+06	4.93549e+06	3.51594e+06	6.3103e+06
A0A384N5Y3|A0A384N5Y3_HUMAN;V9GZ78|V9GZ78_HUMAN;A0A494C1T2|A0A494C1T2_HUMAN	7	7	356.13	4.6785e-09	2.25069e-07	12.0148	1	Competition	Control	A0A384N5Y3	15669.8	21526.9	22024.2	26640.5	20054.5	21446.7	204918	125055	341677	279764	258850	319966	117206	68404	102334	41627.4	79826.2	64684.1	12690.3	27403.4	16802.1	35123.9	18829.4	37190.4	253450	255952	559648	881586	404515	830895	104528	131411	102334	70314.5	83470.3	122628
H3BMH2|H3BMH2_HUMAN;B4DQU5|B4DQU5_HUMAN	5	5	192.56	1.16503e-08	4.54912e-07	40.6984	1	Competition	Control	H3BMH2	7615.78	5435.01	5794.56	6601.03	5696.19	3506.86	111548	143289	352890	160905	461802	179744	86540.5	17339.2	44694.3	18826.4	24957.9	25372.4	6167.71	6918.69	4420.62	8703.05	5348.23	6081.18	137967	293271	578014	507041	721677	466763	77179.6	33310.4	44694.3	31800.4	26097.3	48100.9
P14618|KPYM_HUMAN;B4DNK4|B4DNK4_HUMAN;H3BTN5|H3BTN5_HUMAN;H3BQ34|H3BQ34_HUMAN;H3BR70|H3BR70_HUMAN;H3BTJ2|H3BTJ2_HUMAN;H3BT25|H3BT25_HUMAN;H3BU13|H3BU13_HUMAN;H3BN34|H3BN34_HUMAN;P30613|KPYR_HUMAN	26	26	2188.25	1.32387e-08	4.54912e-07	3.92549	1	Competition	Control	P14618	5.94557e+06	6.50596e+06	5.63401e+06	6.13295e+06	6.90445e+06	9.00643e+06	1.94532e+07	2.89914e+07	2.33752e+07	2.72977e+07	2.56636e+07	3.27464e+07	1.05323e+07	1.5192e+07	1.07171e+07	1.55846e+07	9.24008e+06	1.41835e+07	4.81507e+06	8.28199e+06	4.29814e+06	8.08591e+06	6.48268e+06	1.56179e+07	2.40605e+07	5.93371e+07	3.82872e+07	8.60199e+07	4.01056e+07	8.50364e+07	9.39302e+06	2.91854e+07	1.07171e+07	2.63246e+07	9.66189e+06	2.68889e+07
X6R5C5|X6R5C5_HUMAN;Q5JZH0|Q5JZH0_HUMAN	4	4	221.12	1.53755e-08	4.62295e-07	8.6418	1	Probe	Control	X6R5C5	104342	118903	104976	159800	139714	135906	531020	439327	1.22951e+06	1.05911e+06	879675	973872	1.8572e+06	1.08251e+06	1.06404e+06	652762	832729	1.10999e+06	84502.1	151361	80085.5	210686	131180	235672	656786	899178	2.01387e+06	3.33743e+06	1.37471e+06	2.52897e+06	1.65631e+06	2.07963e+06	1.06404e+06	1.10261e+06	870743	2.1043e+06
P08670|VIME_HUMAN;B0YJC4|B0YJC4_HUMAN;B0YJC5|B0YJC5_HUMAN;A0A1B0GTT5|A0A1B0GTT5_HUMAN;P17661|DESM_HUMAN;A0A1B0GVG8|A0A1B0GVG8_HUMAN;H7C5W5|H7C5W5_HUMAN;E7EMV2|E7EMV2_HUMAN;F8W835|F8W835_HUMAN	26	23	1691.68	2.3882e-08	6.38274e-07	83.5423	1	Competition	Control	P08670	75258.8	118080	46079.8	47609.5	54709.8	67468.2	6.85161e+06	1.83042e+06	2.63547e+06	2.05261e+06	1.03156e+07	1.05003e+07	748834	955941	247073	432475	215337	317005	60949	150314	35153.9	62770.2	51367.7	116995	8.47434e+06	3.74636e+06	4.31675e+06	6.46814e+06	1.61207e+07	2.72674e+07	667834	1.83647e+06	247073	730510	225167	600975
P07237|PDIA1_HUMAN;H7BZ94|H7BZ94_HUMAN;I3L398|I3L398_HUMAN;I3L312|I3L312_HUMAN;I3NI03|I3NI03_HUMAN;I3L4M2|I3L4M2_HUMAN;I3L3U6|I3L3U6_HUMAN;I3L0S0|I3L0S0_HUMAN;I3L3P5|I3L3P5_HUMAN;I3L514|I3L514_HUMAN;I3L1Y5|I3L1Y5_HUMAN	27	12	1650.91	3.05509e-08	7.34858e-07	13.1034	1	Competition	Control	P07237	557020	495340	877347	501576	509287	166070	3.36859e+06	7.78131e+06	6.05212e+06	1.10463e+07	7.25384e+06	5.2055e+06	865302	989369	1.15573e+06	998607	812136	774264	451108	630561	669321	661296	478176	287979	4.16641e+06	1.59261e+07	9.91304e+06	3.48089e+07	1.13359e+07	1.35177e+07	771704	1.90069e+06	1.15573e+06	1.68679e+06	849210	1.46784e+06
P12004|PCNA_HUMAN	6	6	285.38	5.99846e-08	1.31168e-06	5.73491	1	Competition	Control	P12004	293073	321617	369729	261588	514274	426516	1.31029e+06	1.46192e+06	2.57575e+06	2.58949e+06	2.24389e+06	2.35973e+06	859028	790132	970125	493971	911009	1.02145e+06	237348	409413	282063	344887	482859	739615	1.62062e+06	2.99213e+06	4.21894e+06	8.15996e+06	3.50662e+06	6.1278e+06	766109	1.51793e+06	970125	834386	952597	1.93647e+06
P26639|SYTC_HUMAN;A2RTX5|SYTC2_HUMAN;D6R9F8|D6R9F8_HUMAN	6	6	187.23	9.35648e-08	1.87547e-06	9.1925	1	Competition	Control	P26639	22589.3	41110.7	26158.6	29534.6	41735.3	56224.6	231763	262092	469541	170817	361754	502052	130634	88060.3	103285	141483	69231.3	77354.8	18294.2	52333.3	19956.2	38939.5	39185.8	97498.2	286654	536428	769082	538276	565328	1.30374e+06	116504	169174	103285	238984	72391.8	146649
Q5VVC8|Q5VVC8_HUMAN	1	1	77.36	1.02035e-07	1.88792e-06	4.3761	1	Competition	Control	Q5VVC8	705591	635736	512611	511350	814320	495726	2.46439e+06	1.93578e+06	2.57739e+06	2.85452e+06	3.05268e+06	3.19887e+06	2.18097e+06	1.60771e+06	1.93729e+06	1.04916e+06	1.24721e+06	1.03017e+06	571429	809282	391067	674183	764576	859630	3.04806e+06	3.96199e+06	4.22162e+06	8.99511e+06	4.77056e+06	8.30688e+06	1.94506e+06	3.08858e+06	1.93729e+06	1.77217e+06	1.30415e+06	1.953e+06
P48047|ATPO_HUMAN;A0A494C0K9|A0A494C0K9_HUMAN;H7C068|H7C068_HUMAN;H7C086|H7C086_HUMAN	5	5	259.3	1.28758e-07	2.2122e-06	14.4351	1	Competition	Control	P48047	55271.3	54835.6	64732.5	108177	71726.1	49147.1	515086	497589	1.20596e+06	1.22578e+06	1.28102e+06	1.10477e+06	322814	500674	241619	98823.7	220718	275189	44762	69805	49383.9	142625	67344.6	85225.1	637078	1.01842e+06	1.9753e+06	3.86264e+06	2.0019e+06	2.86887e+06	287896	961850	241619	166927	230794	521701
J3QS39|J3QS39_HUMAN;M0R1M6|M0R1M6_HUMAN;M0R1V7|M0R1V7_HUMAN;F5GZ39|F5GZ39_HUMAN	5	5	296.27	1.61839e-07	2.47609e-06	7.88631	1	Competition	Control	J3QS39	1.57984e+06	1.63599e+06	1.69485e+06	1.9065e+06	1.59549e+06	1.50658e+06	9.34903e+06	1.20422e+07	9.85694e+06	1.6829e+07	1.25332e+07	1.7616e+07	8.06581e+06	2.81293e+06	4.97159e+06	2.58296e+06	1.76214e+06	3.23267e+06	1.27945e+06	2.0826e+06	1.29299e+06	2.5136e+06	1.49803e+06	2.61253e+06	1.15632e+07	2.46469e+07	1.61451e+07	5.30313e+07	1.95862e+07	4.57454e+07	7.19335e+06	5.40394e+06	4.97159e+06	4.36299e+06	1.84258e+06	6.12848e+06
R4GN98|R4GN98_HUMAN	1	1	79.52	1.6713e-07	2.47609e-06	7.52396	1	Competition	Control	R4GN98	140217	95910.8	147273	180074	143594	36144.3	640951	1.00911e+06	924887	925931	1.08273e+06	1.00828e+06	689640	702695	636250	561901	399373	524442	113556	122093	112353	237416	134823	62677.2	792753	2.06537e+06	1.51491e+06	2.91778e+06	1.69203e+06	2.61833e+06	615043	1.34995e+06	636250	949129	417604	994234
P08621|RU17_HUMAN;M0QYR1|M0QYR1_HUMAN;M0QX04|M0QX04_HUMAN	12	12	673.38	1.74999e-07	2.47609e-06	2.97991	1	Control	Competition	P08621	4.68242e+06	4.65469e+06	5.74673e+06	4.72525e+06	5.15457e+06	3.35336e+06	1.88223e+06	1.57756e+06	1.66167e+06	1.48942e+06	1.50306e+06	1.38869e+06	2.7268e+06	2.54904e+06	4.37466e+06	2.69397e+06	4.4135e+06	3.27992e+06	3.7921e+06	5.92536e+06	4.38413e+06	6.22994e+06	4.83969e+06	5.81501e+06	2.32801e+06	3.22882e+06	2.72172e+06	4.69344e+06	2.3489e+06	3.60618e+06	2.43185e+06	4.89699e+06	4.37466e+06	4.55049e+06	4.61498e+06	6.21804e+06
P52292|IMA1_HUMAN;J3KS65|J3KS65_HUMAN	8	8	466.26	1.94803e-07	2.54648e-06	8.3955	1	Competition	Control	P52292	76838.5	225910	80732.7	91375.3	114239	169806	675356	698444	1.11441e+06	1.78454e+06	856635	1.24197e+06	336369	609118	338825	407722	266463	360354	62228.4	287581	61590.4	120473	107260	294457	835307	1.42952e+06	1.82534e+06	5.62341e+06	1.3387e+06	3.22517e+06	299985	1.17018e+06	338825	688700	278627	683157
Q15019|SEPT2_HUMAN;B5MCX3|B5MCX3_HUMAN;C9IZU3|C9IZU3_HUMAN;C9J2Q4|C9J2Q4_HUMAN;H7C2Y0|H7C2Y0_HUMAN;A0A1B0GXJ2|A0A1B0GXJ2_HUMAN;B5MD47|B5MD47_HUMAN;C9IY94|C9IY94_HUMAN	5	5	209.18	2.01148e-07	2.54648e-06	11.1758	1	Competition	Control	Q15019	38797.3	56011.2	56088.4	66345.4	56992.8	74197.5	356055	503198	951191	749781	1.04705e+06	286754	154075	269701	156916	261923	98262.1	158465	31420.3	71301.4	42789.4	87472.3	53511.3	128665	440383	1.0299e+06	1.558e+06	2.3627e+06	1.63627e+06	744649	137409	518125	156916	442424	102748	300416
Q07021|C1QBP_HUMAN;I3L3B0|I3L3B0_HUMAN	4	4	243.76	2.64295e-07	2.90881e-06	5.03274	1	Competition	Control	Q07021	882589	399236	760090	633718	838224	442513	3.16088e+06	2.89351e+06	2.25081e+06	2.30578e+06	5.58743e+06	3.71296e+06	1.42312e+06	1.10365e+06	1.44951e+06	1.32994e+06	1.40706e+06	1.43617e+06	714773	508222	579867	835517	787020	767354	3.9095e+06	5.9222e+06	3.68671e+06	7.26592e+06	8.73172e+06	9.64188e+06	1.26918e+06	2.12023e+06	1.44951e+06	2.24645e+06	1.47129e+06	2.72268e+06
Q15084|PDIA6_HUMAN	4	4	245.35	2.76765e-07	2.90881e-06	8.05827	1	Competition	Control	Q15084	289419	427270	225405	289178	266788	230650	1.33243e+06	2.86424e+06	1.37828e+06	2.45202e+06	2.72643e+06	3.177e+06	734593	1.10779e+06	587349	375633	561780	318539	234389	543909	171959	381263	250490	399966	1.64801e+06	5.8623e+06	2.25754e+06	7.72676e+06	4.26071e+06	8.25009e+06	655134	2.12818e+06	587349	634497	587426	603883
H7BZJ3|H7BZJ3_HUMAN	5	1	203.88	2.82448e-07	2.90881e-06	3.59635	1	Competition	Control	H7BZJ3	828131	685511	747660	619409	540395	551236	1.70689e+06	3.00988e+06	2.76843e+06	2.09851e+06	3.10246e+06	1.59974e+06	1.24014e+06	1.03272e+06	1.06699e+06	1.05215e+06	1.01045e+06	692651	670669	872645	570384	816652	507384	955889	2.11115e+06	6.16038e+06	4.53454e+06	6.61277e+06	4.84836e+06	4.15424e+06	1.10599e+06	1.98397e+06	1.06699e+06	1.77723e+06	1.05658e+06	1.31312e+06
Q14974|IMB1_HUMAN;J3KTM9|J3KTM9_HUMAN;J3QKQ5|J3QKQ5_HUMAN;J3QR48|J3QR48_HUMAN	18	18	898.48	2.91895e-07	2.90881e-06	6.48411	1	Competition	Control	Q14974	253050	213198	233961	296078	275715	118476	1.50463e+06	1.67648e+06	1.26602e+06	1.03424e+06	2.14356e+06	1.39108e+06	955219	949685	872357	343292	554431	595787	204935	271398	178487	390361	258873	205447	1.86098e+06	3.43129e+06	2.07366e+06	3.25908e+06	3.34984e+06	3.61239e+06	851896	1.82445e+06	872357	579867	579741	1.12949e+06
P04406|G3P_HUMAN;E7EUT5|E7EUT5_HUMAN;O14556|G3PT_HUMAN	19	18	1394.29	2.9348e-07	2.90881e-06	3.97418	1	Competition	Control	P04406	1.04419e+07	1.09868e+07	1.13051e+07	1.50599e+07	1.41962e+07	1.58587e+07	3.54499e+07	4.76622e+07	4.05035e+07	5.51809e+07	5.60783e+07	7.45097e+07	3.01305e+07	3.24357e+07	2.59761e+07	2.50498e+07	1.51007e+07	2.51355e+07	8.45646e+06	1.3986e+07	8.62459e+06	1.98555e+07	1.3329e+07	2.75002e+07	4.38458e+07	9.75509e+07	6.63426e+07	1.73885e+08	8.7636e+07	1.93488e+08	2.68713e+07	6.23126e+07	2.59761e+07	4.23126e+07	1.57901e+07	4.76517e+07
Q9UQ80|PA2G4_HUMAN;F8VR77|F8VR77_HUMAN;F8W0A3|F8W0A3_HUMAN	5	5	188.37	3.02327e-07	2.90881e-06	10.1238	1	Competition	Control	Q9UQ80	27034.2	27895.3	23954.3	16057.1	31472.8	27498.1	185196	165617	348200	244691	357797	256672	38004.4	30204.4	99374.7	120250	40291.6	89613.1	21893.9	35510.3	18274.6	21170.3	29550.3	47683.9	229057	338971	570333	771067	559145	666529	33893.5	58026	99374.7	203119	42130.9	169888
C9JIZ6|C9JIZ6_HUMAN;Q5BJH1|Q5BJH1_HUMAN;A0A0J9YXB8|A0A0J9YXB8_HUMAN	17	17	926.75	3.2675e-07	3.02288e-06	21.7706	1	Probe	Control	C9JIZ6	963344	1.00618e+06	594431	708735	808437	1.67003e+06	1.47675e+06	977026	9.11434e+06	6.76398e+06	3.03043e+06	2.22128e+06	2.77702e+07	1.49388e+07	2.70845e+07	1.95712e+07	1.81561e+07	1.76855e+07	780173	1.28086e+06	453487	934423	759052	2.89597e+06	1.8265e+06	1.9997e+06	1.49288e+07	2.13145e+07	4.73578e+06	5.76826e+06	2.47664e+07	2.8699e+07	2.70845e+07	3.30584e+07	1.89849e+07	3.3528e+07
H0YFA4|H0YFA4_HUMAN;H0YHD8|H0YHD8_HUMAN	2	2	140.02	3.62965e-07	3.14152e-06	6.90324	1	Competition	Control	H0YFA4	92002	46520.5	54067.8	47614.2	70162.9	39867.9	329333	293902	257980	531669	512952	491923	257591	250552	214102	305596	101100	142441	74508.6	59220	41247.9	62776.3	65876.8	69134.2	407332	601533	422557	1.67539e+06	801612	1.27743e+06	229728	481338	214102	516194	105715	270038
P00491|PNPH_HUMAN;G3V5M2|G3V5M2_HUMAN;G3V2H3|G3V2H3_HUMAN;G3V393|G3V393_HUMAN	4	4	125.86	3.66923e-07	3.14152e-06	5.34468	1	Competition	Control	P00491	102527	78341.4	72126.3	91486.3	72024.1	83569.7	427776	309583	460373	595081	376820	503112	142530	258485	134681	70041.4	89825.3	167800	83032.8	99727.5	55024.6	120619	67624.4	144917	529090	633629	754065	1.87521e+06	588873	1.30649e+06	127113	496578	134681	118310	93925.8	318114
H0Y8G5|H0Y8G5_HUMAN;D6RAF8|D6RAF8_HUMAN;D6RD83|D6RD83_HUMAN	4	2	126.66	3.78756e-07	3.14152e-06	10.9621	1	Competition	Control	H0Y8G5	5986.51	9018.17	10289.7	12444.8	7960.09	11276.9	117392	52181.4	142590	95782.8	165726	50905.7	25978.6	56824.9	15191.3	30362.6	19417.3	27834.6	4848.23	11480	7849.94	16407.7	7473.84	19555	145195	106801	233555	301829	258987	132193	23168.6	109167	15191.3	51286.7	20303.7	52768.6
O60664|PLIN3_HUMAN;K7ERZ3|K7ERZ3_HUMAN;K7EL96|K7EL96_HUMAN;K7ER39|K7ER39_HUMAN	6	6	205.61	4.14222e-07	3.32117e-06	16.5243	1	Competition	Control	O60664	8705.04	11216.5	6603.25	3582.79	4913.73	7919.15	73018.4	87394.4	37055.9	231905	145211	134974	62479.1	95065.5	91326.3	72261.4	58754.3	24335.1	7049.85	14278.4	5037.57	4723.68	4613.56	13732.5	90312	178872	60695.5	730775	226927	350504	55720.9	182631	91326.3	122060	61436.4	46134.4
Q9NS69|TOM22_HUMAN	4	4	250.63	4.6484e-07	3.52788e-06	8.19584	1	Competition	Control	Q9NS69	628355	290948	438532	371960	289574	478051	1.79441e+06	2.18315e+06	5.40917e+06	4.2805e+06	3.37045e+06	3.43079e+06	858058	867441	745587	263829	629909	831720	508879	370372	334552	490406	271885	828980	2.21939e+06	4.46828e+06	8.85992e+06	1.34886e+07	5.26715e+06	8.90913e+06	765244	1.66645e+06	745587	445643	658665	1.57677e+06
P23396|RS3_HUMAN;E9PL09|E9PL09_HUMAN;H0YEU2|H0YEU2_HUMAN;E9PPU1|E9PPU1_HUMAN;F2Z2S8|F2Z2S8_HUMAN;H0YF32|H0YF32_HUMAN;E9PJH4|E9PJH4_HUMAN;E9PSF4|E9PSF4_HUMAN;E9PQX2|E9PQX2_HUMAN;H0YES8|H0YES8_HUMAN	14	14	579.86	4.69336e-07	3.52788e-06	6.61345	1	Competition	Control	P23396	814219	666801	514557	640077	716771	426788	3.2663e+06	1.90629e+06	5.3143e+06	5.50429e+06	4.88793e+06	4.1145e+06	2.10434e+06	1.61033e+06	1.88926e+06	1.00556e+06	1.3063e+06	846654	659403	848828	392552	843901	672985	740085	4.03989e+06	3.90164e+06	8.70453e+06	1.7345e+07	7.63858e+06	1.06846e+07	1.87672e+06	3.09361e+06	1.88926e+06	1.69853e+06	1.36594e+06	1.60508e+06
P30101|PDIA3_HUMAN	17	13	986.38	4.90082e-07	3.57219e-06	4.33092	1	Competition	Control	P30101	951625	921764	935073	933403	802779	914771	2.72564e+06	2.32374e+06	5.56914e+06	3.57501e+06	4.0347e+06	5.41605e+06	2.19017e+06	1.62754e+06	1.81312e+06	1.16828e+06	1.18835e+06	1.0911e+06	770682	1.17339e+06	713360	1.23063e+06	753740	1.58629e+06	3.37118e+06	4.75605e+06	9.12195e+06	1.12655e+07	6.3052e+06	1.40645e+07	1.95326e+06	3.12669e+06	1.81312e+06	1.97339e+06	1.2426e+06	2.0685e+06
P60174|TPIS_HUMAN;U3KPZ0|U3KPZ0_HUMAN;U3KQF3|U3KQF3_HUMAN;U3KPS5|U3KPS5_HUMAN	14	14	1004.38	5.55548e-07	3.92622e-06	3.56807	1	Competition	Control	P60174	2.00923e+06	1.00872e+06	1.88988e+06	2.36294e+06	2.27704e+06	1.94935e+06	4.92563e+06	5.9886e+06	7.39909e+06	8.57962e+06	7.66649e+06	6.46325e+06	3.2496e+06	3.37485e+06	4.176e+06	3.99845e+06	4.19415e+06	5.62734e+06	1.62719e+06	1.28408e+06	1.44178e+06	3.11539e+06	2.13794e+06	3.38034e+06	6.09221e+06	1.2257e+07	1.21193e+07	2.7036e+07	1.19808e+07	1.67839e+07	2.8981e+06	6.48346e+06	4.176e+06	6.75394e+06	4.38562e+06	1.06683e+07
Q12931|TRAP1_HUMAN;I3L0K7|I3L0K7_HUMAN;I3L239|I3L239_HUMAN	4	3	215.87	5.71299e-07	3.92622e-06	5.12642	1	Competition	Control	Q12931	80837.8	49917.1	51073	45062.5	59810.5	63255.1	299703	137379	250835	324036	446369	335699	164954	145421	155990	208167	138370	96822.3	65467.2	63543.8	38963.2	59412.1	56156.9	109690	370685	281176	410854	1.0211e+06	697561	871750	147112	279370	155990	351623	144687	183555
A0A087WUK2|A0A087WUK2_HUMAN	3	1	109.04	6.32576e-07	4.22658e-06	11.0043	1	Competition	Control	A0A087WUK2	300.466	373.718	444.749	332.311	392.58	176.794	1478.86	2391.53	2413.85	4572.87	9009.46	2369.02	1249.11	1504.57	1596.66	1234.78	1168.84	1903.34	243.335	475.738	339.296	438.132	368.599	306.575	1829.11	4894.79	3953.76	14410	14079.5	6151.9	1114	2890.43	1596.66	2085.71	1222.2	3608.33
P04083|ANXA1_HUMAN;Q5T3N1|Q5T3N1_HUMAN;Q5T3N0|Q5T3N0_HUMAN	15	14	1107.18	6.58381e-07	4.28011e-06	5.18095	1	Competition	Control	P04083	638953	654981	628779	586721	751855	655049	2.75197e+06	2.12962e+06	3.53033e+06	4.41322e+06	5.03315e+06	2.43205e+06	2.06494e+06	1.69e+06	1.761e+06	730872	1.99974e+06	1.69948e+06	517462	833782	479690	773554	705926	1.13591e+06	3.40375e+06	4.35873e+06	5.78248e+06	1.39068e+07	7.86553e+06	6.31558e+06	1.84158e+06	3.24668e+06	1.761e+06	1.23454e+06	2.09103e+06	3.22187e+06
J3KQL8|J3KQL8_HUMAN;Q9BQE5|APOL2_HUMAN;E9PM95|E9PM95_HUMAN;B0QYK8|B0QYK8_HUMAN	5	5	449.65	7.1689e-07	4.53783e-06	12.162	1	Competition	Control	J3KQL8	316130	263504	367641	277410	278501	170464	1.31927e+06	2.27942e+06	6.48554e+06	3.85555e+06	4.65791e+06	1.75717e+06	1.31238e+06	461763	996951	1.39247e+06	885066	792516	256020	335437	280470	365747	261488	295598	1.63172e+06	4.66532e+06	1.0623e+07	1.21495e+07	7.27912e+06	4.56304e+06	1.17042e+06	887097	996951	2.35207e+06	925469	1.50245e+06
P04075|ALDOA_HUMAN;H3BQN4|H3BQN4_HUMAN;J3KPS3|J3KPS3_HUMAN;H3BPS8|H3BPS8_HUMAN;H3BR04|H3BR04_HUMAN;H3BUH7|H3BUH7_HUMAN;H3BMQ8|H3BMQ8_HUMAN;H3BU78|H3BU78_HUMAN;H3BR68|H3BR68_HUMAN;A0A087WXX2|A0A087WXX2_HUMAN	21	16	1354.89	7.39748e-07	4.56245e-06	6.3286	1	Competition	Control	P04075	934974	1.09705e+06	956497	1.87843e+06	1.07511e+06	2.57148e+06	5.47095e+06	9.05797e+06	9.47639e+06	9.17383e+06	7.5978e+06	1.31019e+07	3.11171e+06	4.5743e+06	3.31205e+06	4.34818e+06	1.73738e+06	2.51714e+06	757197	1.39653e+06	729704	2.47659e+06	1.00944e+06	4.45916e+06	6.76668e+06	1.85391e+07	1.55218e+07	2.89084e+07	1.18734e+07	3.40232e+07	2.77513e+06	8.78773e+06	3.31205e+06	7.34469e+06	1.81669e+06	4.77198e+06
P07437|TBB5_HUMAN;Q5JP53|Q5JP53_HUMAN;Q5ST81|Q5ST81_HUMAN;A0A075B736|A0A075B736_HUMAN;M0R042|M0R042_HUMAN;Q9H4B7|TBB1_HUMAN;G3V3J6|G3V3J6_HUMAN	24	4	2052.07	8.87207e-07	5.33512e-06	3.65232	1	Competition	Control	P07437	3.90615e+06	4.86131e+06	3.49713e+06	3.96061e+06	4.33166e+06	5.91365e+06	1.16458e+07	1.51374e+07	1.31672e+07	1.68778e+07	1.71834e+07	2.26673e+07	8.15539e+06	1.8456e+07	8.48073e+06	1.17505e+07	8.06532e+06	1.16057e+07	3.16343e+06	6.18838e+06	2.66793e+06	5.22182e+06	4.06705e+06	1.02548e+07	1.4404e+07	3.09819e+07	2.15671e+07	5.3185e+07	2.68532e+07	5.88628e+07	7.27324e+06	3.5456e+07	8.48073e+06	1.98482e+07	8.4335e+06	2.2002e+07
M0R0F0|M0R0F0_HUMAN;M0QZN2|M0QZN2_HUMAN	5	5	385.07	1.05143e-06	6.16843e-06	2.86988	1	Competition	Control	M0R0F0	1.26488e+06	1.00611e+06	1.10996e+06	1.10253e+06	1.35697e+06	1.6846e+06	2.73059e+06	2.79514e+06	3.34454e+06	4.29307e+06	3.65463e+06	4.77795e+06	1.74218e+06	1.88745e+06	2.31337e+06	1.89451e+06	2.52671e+06	2.91324e+06	1.02438e+06	1.28076e+06	846781	1.45361e+06	1.27407e+06	2.92123e+06	3.3773e+06	5.72086e+06	5.47818e+06	1.35283e+07	5.71125e+06	1.24075e+07	1.55373e+06	3.62599e+06	2.31337e+06	3.2001e+06	2.64205e+06	5.52289e+06
P26038|MOES_HUMAN;A0A2R8Y5S7|A0A2R8Y5S7_HUMAN;V9GZ54|V9GZ54_HUMAN	17	11	594.52	1.10178e-06	6.29251e-06	2.01796	1	Probe	Competition	P26038	2.73939e+08	2.88939e+08	2.87898e+08	3.27993e+08	2.20297e+08	2.89234e+08	1.6627e+08	1.63713e+08	1.15579e+08	1.24858e+08	1.37435e+08	1.49875e+08	2.50239e+08	3.26041e+08	2.22964e+08	2.80313e+08	2.78334e+08	3.72975e+08	2.21852e+08	3.67815e+08	2.19635e+08	4.32438e+08	2.0684e+08	5.01555e+08	2.0565e+08	3.35074e+08	1.89311e+08	3.93451e+08	2.14776e+08	3.89199e+08	2.23171e+08	6.26361e+08	2.22964e+08	4.73487e+08	2.9104e+08	7.07084e+08
Q8IV04|TB10C_HUMAN	1	1	35.91	1.15034e-06	6.29251e-06	2.13204	1	Control	Competition	Q8IV04	6.66681e+07	6.09945e+07	5.38308e+07	6.42692e+07	4.23572e+07	5.36137e+07	2.99811e+07	3.41894e+07	2.23853e+07	2.46333e+07	2.5014e+07	2.40815e+07	4.30564e+07	4.7966e+07	4.10777e+07	5.73048e+07	4.49035e+07	5.76025e+07	5.39918e+07	7.76452e+07	4.10671e+07	8.47349e+07	3.97697e+07	9.29705e+07	3.70818e+07	6.99761e+07	3.66659e+07	7.76239e+07	3.90905e+07	6.25352e+07	3.83991e+07	9.2148e+07	4.10777e+07	9.67958e+07	4.69534e+07	1.09202e+08
Q13162|PRDX4_HUMAN;H7C3T4|H7C3T4_HUMAN;A6NJJ0|A6NJJ0_HUMAN;A6NG45|A6NG45_HUMAN	8	7	517.33	1.15106e-06	6.29251e-06	14.2374	1	Competition	Control	Q13162	78771.1	56882.4	63145.4	54517.7	54405.7	74146.9	830907	182380	551264	1.26549e+06	922618	1.68415e+06	192827	180984	134648	122624	83350.5	111035	63793.5	72410.5	48173.2	71878.2	51082.2	128577	1.0277e+06	373280	902940	3.9878e+06	1.44182e+06	4.37343e+06	171969	347690	134648	207129	87155.5	210500
F5H5D3|F5H5D3_HUMAN;A0A1W2PQM2|A0A1W2PQM2_HUMAN;F8VVB9|F8VVB9_HUMAN;F8VQQ4|F8VQQ4_HUMAN;F8VS66|F8VS66_HUMAN;F8VRZ4|F8VRZ4_HUMAN;F8VWV9|F8VWV9_HUMAN;A6NHL2|TBAL3_HUMAN;C9JDL2|C9JDL2_HUMAN;F8VRK0|F8VRK0_HUMAN;F8W0F6|F8W0F6_HUMAN;Q9H853|TBA4B_HUMAN	19	2	1576.58	1.30166e-06	6.83036e-06	4.00861	1	Competition	Control	F5H5D3	831888	584964	740314	666147	826189	428899	1.64556e+06	2.8038e+06	2.64408e+06	3.81336e+06	2.7182e+06	2.72374e+06	1.45459e+06	1.58466e+06	1.53378e+06	742841	1.19594e+06	1.62188e+06	673712	744650	564780	878273	775720	743746	2.03529e+06	5.73859e+06	4.33086e+06	1.20166e+07	4.24784e+06	7.07306e+06	1.29725e+06	3.0443e+06	1.53378e+06	1.25476e+06	1.25053e+06	3.07474e+06
P25788|PSA3_HUMAN;G3V4X5|G3V4X5_HUMAN	2	2	112.65	1.30624e-06	6.83036e-06	5.54554	1	Competition	Control	P25788	56968.9	67887.1	69777.1	93710.8	62453.9	64913.2	215302	607032	361444	385541	349615	386408	127016	273281	157279	72409.6	101019	114645	46136.8	86419.4	53232.4	123552	58638.8	112565	266293	1.24242e+06	592025	1.21491e+06	546358	1.00343e+06	113277	525002	157279	122310	105631	217343
Q9HC07|TM165_HUMAN;D6RBL0|D6RBL0_HUMAN;V9GY93|V9GY93_HUMAN	2	2	89.65	1.60894e-06	8.2342e-06	12.813	1	Competition	Control	Q9HC07	42273.9	42074.5	37975.9	70152.5	44591.8	38221.7	304739	245344	693127	820694	699873	763530	519141	604120	309547	353975	91648.7	190722	34235.9	53560.2	28971.5	92491.6	41867.9	66279.7	376912	502151	1.1353e+06	2.58616e+06	1.09372e+06	1.98275e+06	462987	1.16058e+06	309547	597913	95832.5	361569
P04843|RPN1_HUMAN;B7Z4L4|B7Z4L4_HUMAN;F8WF32|F8WF32_HUMAN	17	17	727.73	1.79433e-06	8.99167e-06	6.28882	1	Competition	Control	P04843	314980	482510	357681	630384	353462	945137	2.59922e+06	2.45384e+06	4.32056e+06	2.66501e+06	5.20702e+06	2.15003e+06	1.35754e+06	1.98161e+06	922367	1.49241e+06	723754	1.12425e+06	255090	614229	272872	831122	331870	1.63895e+06	3.21482e+06	5.02231e+06	7.07684e+06	8.39792e+06	8.13723e+06	5.58324e+06	1.2107e+06	3.80688e+06	922367	2.52089e+06	756794	2.13134e+06
P51572|BAP31_HUMAN;A0A2R8Y5M6|A0A2R8Y5M6_HUMAN;C9J0M4|C9J0M4_HUMAN	3	2	120.45	2.02322e-06	9.93172e-06	9.08553	1	Competition	Control	P51572	12922.5	17747.8	20735.5	15060.6	11823.5	24294	100412	79593.8	228651	208697	173127	141549	94095.9	36565.7	108778	164444	36006.2	69269.8	10465.4	22592.7	15819	19856.5	11101.2	42127.9	124194	162906	374518	657641	270553	367578	83917.8	70246.6	108778	277768	37649.8	131321
P18206|VINC_HUMAN;A0A096LPE1|A0A096LPE1_HUMAN	9	9	428.7	2.0721e-06	9.93172e-06	5.89035	1	Competition	Control	P18206	48251.8	57873.5	17655.3	24955	39033.3	72259.9	187074	238819	269158	292566	281860	262185	114523	165994	132316	89002.5	56536.8	100864	39077.1	73672.2	13469.1	32901.6	36648.9	125305	231380	488796	440865	921928	440475	680846	102135	318893	132316	150338	59117.7	191216
P23381|SYWC_HUMAN;G3V277|G3V277_HUMAN;G3V3H8|G3V3H8_HUMAN;G3V227|G3V227_HUMAN;G3V423|G3V423_HUMAN;H0YJP3|H0YJP3_HUMAN;G3V2C0|G3V2C0_HUMAN;G3V2Y7|G3V2Y7_HUMAN	8	8	349.25	2.12582e-06	9.93172e-06	4.93061	1	Competition	Control	P23381	98676.7	172781	122220	141756	167463	222996	478731	711864	729917	1.09287e+06	775366	776472	241972	526335	306785	246888	155032	178536	79914.2	219947	93241	186896	157234	386694	592114	1.45698e+06	1.19556e+06	3.44383e+06	1.2117e+06	2.01636e+06	215798	1.01115e+06	306785	417028	162109	338468
C9JKL2|C9JKL2_HUMAN	1	1	56.81	2.17794e-06	9.93172e-06	28.1689	1	Competition	Control	C9JKL2	2355.93	4210.23	2620.11	3624.29	1152.99	5491.4	35584.5	36266.9	93134.8	183829	112942	86268.5	4650.61	36658.3	7615.92	4248.07	6477.9	16746.7	1907.97	5359.56	1998.86	4778.4	1082.56	9522.54	44012.3	74228.1	152550	579278	176499	224024	4147.56	70424.7	7615.92	7175.58	6773.61	31748.2
G3XAN4|G3XAN4_HUMAN	7	7	476.04	2.22937e-06	9.93172e-06	12.7345	1	Competition	Control	G3XAN4	31448.6	41187.6	39561.3	151377	38823.5	172176	454124	494291	766095	1.03183e+06	1.29233e+06	2.0048e+06	145791	83424.7	160283	151864	101400	142186	25468.9	52431.3	30181	199581	36451.9	298568	561678	1.01167e+06	1.25482e+06	3.25149e+06	2.01958e+06	5.20609e+06	130021	160268	160283	256520	106029	269556
O14818|PSA7_HUMAN;H0Y586|H0Y586_HUMAN;Q8TAA3|PSMA8_HUMAN;A0A087WYS6|A0A087WYS6_HUMAN;F5GY34|F5GY34_HUMAN	4	4	243.03	2.25742e-06	9.93172e-06	8.78893	1	Competition	Control	O14818	42764.9	41515.5	62052.5	35079	47270.3	79595	341679	204066	674409	222460	584914	681898	245262	257856	164717	89401	127589	124776	34633.5	52848.7	47339.4	46249.4	44382.7	138024	422602	417666	1.10465e+06	701013	914070	1.77076e+06	218732	495369	164717	151011	133413	236550
O95373|IPO7_HUMAN;E9PLB2|E9PLB2_HUMAN	4	4	272.43	2.27095e-06	9.93172e-06	5.76919	1	Competition	Control	O95373	96744.8	203939	57569.5	78795.1	143137	166387	457614	989522	460459	888485	859133	651903	301908	205376	276515	269046	387871	187840	78349.6	259611	43919.3	103886	134393	288528	565994	2.02527e+06	754206	2.79978e+06	1.3426e+06	1.69287e+06	269252	394550	276515	454456	405577	356107
A0A0A0MR02|A0A0A0MR02_HUMAN;Q5JSD1|Q5JSD1_HUMAN;A2A3S1|A2A3S1_HUMAN	14	14	1111.03	2.37116e-06	1.01848e-05	28.0147	1	Competition	Control	A0A0A0MR02	2.25711e+06	1.51053e+06	1.40633e+06	918169	1.17355e+06	687554	2.97477e+07	7.28369e+06	3.52868e+07	2.85304e+07	6.01997e+07	6.17593e+07	2.70107e+07	2.3893e+07	1.19729e+07	1.10753e+07	4.24183e+06	4.63676e+06	1.82794e+06	1.92288e+06	1.07288e+06	1.21055e+06	1.10186e+06	1.19228e+06	3.67931e+07	1.49076e+07	5.77978e+07	8.99045e+07	9.40766e+07	1.60378e+08	2.4089e+07	4.59011e+07	1.19729e+07	1.87078e+07	4.43547e+06	8.79033e+06
P05023|AT1A1_HUMAN;A0A0A0MT26|A0A0A0MT26_HUMAN;B1AKY9|B1AKY9_HUMAN;H0Y7C1|H0Y7C1_HUMAN;Q5TC01|Q5TC01_HUMAN;P54707|AT12A_HUMAN;Q13733|AT1A4_HUMAN;Q5TC02|Q5TC02_HUMAN;M0QXF2|M0QXF2_HUMAN;P20648|ATP4A_HUMAN;E9PRA5|E9PRA5_HUMAN	20	19	1018.46	2.46708e-06	1.04109e-05	5.04326	1	Competition	Control	P05023	607462	466530	577438	751556	417367	313398	2.30164e+06	1.9953e+06	4.13017e+06	2.16933e+06	3.86813e+06	1.33974e+06	1.48349e+06	898852	1.36177e+06	1.33073e+06	879940	1.25159e+06	491958	593886	440523	990879	391871	543458	2.84676e+06	4.08382e+06	6.76499e+06	6.83597e+06	6.04489e+06	3.47907e+06	1.32303e+06	1.72679e+06	1.36177e+06	2.24778e+06	920110	2.37276e+06
P30084|ECHM_HUMAN	4	4	158.83	2.78802e-06	1.15624e-05	8.86796	1	Competition	Control	P30084	10269.3	22218.4	23300.5	9985.05	37157.3	18603.6	104965	159198	186697	309859	158929	158111	81455.2	27457.8	64123.4	77982.5	32044.6	25870.2	8316.68	28283.7	17775.8	13164.7	34887.5	32260.1	129825	325834	305799	976422	248366	410585	72644.4	52749.5	64123.4	131723	33507.5	49044.6
P43034|LIS1_HUMAN;I3L3N5|I3L3N5_HUMAN;I3L495|I3L495_HUMAN	3	3	162.84	2.84864e-06	1.15821e-05	4.90892	1	Competition	Control	P43034	91429.5	46885.3	37000.4	51194.6	39048.7	26438.1	179993	152643	342406	212841	268372	277134	124646	70985.6	130984	71923	129506	130653	74045	59684.3	28227.3	67496.8	36663.4	45845.8	222622	312417	560842	670700	419396	719666	111163	136371	130984	121488	135418	247690
Q9UGP8|SEC63_HUMAN;A6PVC9|A6PVC9_HUMAN	3	3	97.8	2.88909e-06	1.15821e-05	11.661	1	Competition	Control	Q9UGP8	10377.7	7687.05	14730	17932.9	19044.6	4950.71	140505	112051	168529	137566	163555	149138	21008.2	85251.8	36244.2	8653.69	35103.6	41812.9	8404.46	9785.51	11237.4	23643.4	17881.2	8584.94	173783	229338	276041	433495	255595	387284	18735.8	163778	36244.2	14617.3	36706	79268.5
P78371|TCPB_HUMAN;F5GWF6|F5GWF6_HUMAN;F8VQ14|F8VQ14_HUMAN	12	12	751.79	3.4411e-06	1.33505e-05	5.03208	0.999999	Competition	Control	P78371	160104	239168	105133	223791	132851	372806	575285	1.29791e+06	1.02305e+06	1.37245e+06	886908	1.05324e+06	436949	536735	245219	350819	273360	353939	129662	304457	80205.1	295054	124735	646477	711534	2.65645e+06	1.6757e+06	4.32485e+06	1.38601e+06	2.73506e+06	389685	1.03113e+06	245219	592583	285839	670995
P32969|RL9_HUMAN;A0A2R8Y5Y7|A0A2R8Y5Y7_HUMAN;D6RAN4|D6RAN4_HUMAN;H0Y9V9|H0Y9V9_HUMAN;E7ESE0|E7ESE0_HUMAN;H0Y9R4|H0Y9R4_HUMAN	8	8	344.99	3.44121e-06	1.33505e-05	7.39187	0.999999	Competition	Control	P32969	137566	439778	182688	273211	242969	468880	1.35449e+06	2.35829e+06	1.35581e+06	3.03755e+06	1.90452e+06	2.88884e+06	489754	1.27956e+06	518380	1.48343e+06	645715	729636	111409	559831	139371	360212	228126	813077	1.67528e+06	4.82676e+06	2.22074e+06	9.57188e+06	2.97627e+06	7.50179e+06	436778	2.45817e+06	518380	2.50572e+06	675192	1.38324e+06
P07355|ANXA2_HUMAN;H0YN42|H0YN42_HUMAN;H0YMD0|H0YMD0_HUMAN;A6NMY6|AXA2L_HUMAN;H0YKS4|H0YKS4_HUMAN;H0YM50|H0YM50_HUMAN;H0YNP5|H0YNP5_HUMAN;H0YL33|H0YL33_HUMAN;H0YMM1|H0YMM1_HUMAN;H0YKX9|H0YKX9_HUMAN;H0YKL9|H0YKL9_HUMAN;H0YMW4|H0YMW4_HUMAN;H0YNA0|H0YNA0_HUMAN;H0YKV8|H0YKV8_HUMAN;H0YN52|H0YN52_HUMAN;H0YMD9|H0YMD9_HUMAN;H0YKN4|H0YKN4_HUMAN;H0YLE2|H0YLE2_HUMAN	22	22	1659.08	3.50948e-06	1.33993e-05	4.36163	0.999999	Competition	Control	P07355	2.70964e+06	4.03305e+06	1.98239e+06	2.90198e+06	1.881e+06	3.16545e+06	8.5535e+06	9.12457e+06	6.94915e+06	1.42471e+07	1.37221e+07	2.01272e+07	5.76575e+06	6.17385e+06	4.88462e+06	6.33646e+06	3.50568e+06	5.1356e+06	2.19442e+06	5.13401e+06	1.51235e+06	3.82608e+06	1.7661e+06	5.48915e+06	1.05793e+07	1.86754e+07	1.13823e+07	4.48953e+07	2.14442e+07	5.22666e+07	5.14208e+06	1.18606e+07	4.88462e+06	1.07032e+07	3.66571e+06	9.73603e+06
P30048|PRDX3_HUMAN	6	6	228.61	3.62509e-06	1.36244e-05	4.55048	0.999999	Competition	Control	P30048	101935	132500	95709.1	165222	107216	196398	444094	610306	455777	1.03829e+06	597299	489979	282202	189531	213447	446700	171674	325902	82553	168671	73015.7	217835	100667	340571	549273	1.24912e+06	746537	3.27185e+06	933425	1.27239e+06	251677	364111	213447	754538	179511	617842
A6NP52|A6NP52_HUMAN	2	2	90.34	3.72974e-06	1.38021e-05	6.17688	0.999999	Competition	Control	A6NP52	48499.4	92621.1	33159.1	30768.1	23905.9	65827.3	227568	202969	216519	397499	288912	487359	253982	490875	262366	183266	123030	251294	39277.7	117905	25296.8	40565.8	22445.6	114150	281465	415419	354646	1.25259e+06	451495	1.26558e+06	226509	943025	262366	309561	128646	476402
P09543|CN37_HUMAN;C9K0L8|C9K0L8_HUMAN;K7ERC4|K7ERC4_HUMAN	5	4	174.67	3.85139e-06	1.39719e-05	15.0692	0.999999	Competition	Control	P09543	5050.81	4634.3	4808.13	13198.4	18323.5	9255.33	52284.3	107141	203606	201023	172022	96804.2	86521.6	24269.5	31778.5	17935.9	12190.7	30822.3	4090.45	5899.39	3668.09	17401.3	17204.1	16049.5	64667.2	219286	333495	633460	268826	251383	77162.8	46624.3	31778.5	30296.3	12747.2	58432.8
Q9NSE4|SYIM_HUMAN	1	1	67.27	3.92173e-06	1.39719e-05	11.5658	0.999999	Competition	Control	Q9NSE4	10586.7	9760.96	9000.67	9631.44	3536.86	16922	60281.9	72500.4	75739.1	165663	139908	173362	24225.3	43451.9	20649.3	61424.4	14352.5	13079	8573.76	12425.6	6866.54	12698.4	3320.8	29344.1	74559	148388	124057	522033	218641	450191	21604.9	83475.9	20649.3	103754	15007.7	24795
A0A140T9T7|A0A140T9T7_HUMAN;A0A0S2Z4R8|A0A0S2Z4R8_HUMAN	12	12	582.17	3.94989e-06	1.39719e-05	6.77726	0.999999	Competition	Control	A0A140T9T7	115620	172478	218565	196583	145442	420399	1.18772e+06	1.03955e+06	1.33032e+06	2.0397e+06	2.05973e+06	943927	716254	897518	560886	447708	280094	279919	93636.2	219562	166742	259182	136557	729007	1.46901e+06	2.12766e+06	2.17899e+06	6.42745e+06	3.21883e+06	2.45121e+06	638779	1.72423e+06	560886	756240	292880	530668
P38117|ETFB_HUMAN;M0QY67|M0QY67_HUMAN	3	3	114.75	4.08405e-06	1.40229e-05	8.58213	0.999999	Competition	Control	P38117	24657.6	5247.4	14151.1	6641.01	20534.2	5278.97	64955.2	139699	130419	87189.9	120788	113571	40785.5	58394	36808.1	19330.3	28699.6	61928.1	19969.2	6679.86	10795.8	8755.75	19279.8	9154.17	80339.1	285924	213619	274751	188760	294924	36373.8	112181	36808.1	32651.6	30009.8	117403
A0A286YFF7|A0A286YFF7_HUMAN;A0A286YFE3|A0A286YFE3_HUMAN;E9PIA8|E9PIA8_HUMAN;E9PK48|E9PK48_HUMAN;E9PSE5|E9PSE5_HUMAN	6	5	374.21	4.1227e-06	1.40229e-05	45.7777	0.999999	Probe	Control	A0A286YFF7	64084	78436.6	68637.1	34011	73370.6	102469	521098	35829.3	1.17669e+06	1.26672e+06	1.14573e+06	1.00817e+06	3.23404e+06	4.41277e+06	3.11699e+06	3.62819e+06	2.47851e+06	2.40228e+06	51899	99848.7	52362.7	44841.3	68888.6	177690	644514	73332.4	1.92736e+06	3.99167e+06	1.79049e+06	2.61804e+06	2.88423e+06	8.47742e+06	3.11699e+06	6.12852e+06	2.59165e+06	4.55423e+06
A0A0G2JLB3|A0A0G2JLB3_HUMAN	4	4	173.72	4.13921e-06	1.40229e-05	3.69401	0.999999	Probe	Control	A0A0G2JLB3	239219	379335	147730	190582	131905	229135	324846	373504	529982	381038	490688	310260	651361	1.0508e+06	1.06935e+06	578548	697271	821022	193733	482888	112702	251271	123848	397338	401783	764456	868082	1.20072e+06	766820	805688	580905	2.0187e+06	1.06935e+06	977248	729101	1.55649e+06
P07195|LDHB_HUMAN;A0A3B3IS95|A0A3B3IS95_HUMAN;A8MW50|A8MW50_HUMAN;C9J7H8|C9J7H8_HUMAN	10	9	636.2	4.53198e-06	1.49565e-05	4.57013	0.999999	Competition	Control	P07195	736354	741979	873941	1.09886e+06	715177	683949	3.88501e+06	3.33311e+06	4.9283e+06	2.16356e+06	5.20552e+06	2.65081e+06	2.61043e+06	3.7348e+06	2.13155e+06	1.13482e+06	1.48262e+06	2.04803e+06	596343	944529	666723	1.44878e+06	671489	1.18602e+06	4.80513e+06	6.82194e+06	8.07229e+06	6.81778e+06	8.13489e+06	6.88368e+06	2.32807e+06	7.17496e+06	2.13155e+06	1.91687e+06	1.5503e+06	3.88265e+06
K7ELL7|K7ELL7_HUMAN;A0A0C4DGP4|A0A0C4DGP4_HUMAN	5	5	225.06	4.53914e-06	1.49565e-05	10.0337	0.999999	Competition	Control	K7ELL7	38169.8	39872	53825.4	19867.5	62266.4	30939.5	375960	186549	451162	241645	714844	487488	197361	102021	138360	60258.5	72471.2	37255.8	30912.1	50756.5	41063	26194.1	58462.7	53651.6	465002	381813	738979	761467	1.11712e+06	1.26592e+06	176013	195993	138360	101785	75779.6	70629.4
P10809|CH60_HUMAN;E7ESH4|E7ESH4_HUMAN;E7EXB4|E7EXB4_HUMAN;C9JL25|C9JL25_HUMAN;C9J0S9|C9J0S9_HUMAN;C9JCQ4|C9JCQ4_HUMAN	24	23	1600.52	4.60457e-06	1.49671e-05	6.69892	0.999999	Competition	Control	P10809	1.26352e+06	1.46532e+06	1.06925e+06	2.78449e+06	1.29501e+06	2.84166e+06	7.54041e+06	7.33555e+06	7.53092e+06	7.77531e+06	1.8396e+07	2.32292e+07	4.23496e+06	4.75416e+06	3.22013e+06	4.49664e+06	2.89257e+06	4.42127e+06	1.02327e+06	1.86533e+06	815719	3.67118e+06	1.21591e+06	4.92768e+06	9.32628e+06	1.50138e+07	1.23352e+07	2.45014e+07	2.87482e+07	6.03221e+07	3.77688e+06	9.13327e+06	3.22013e+06	7.59545e+06	3.02462e+06	8.38182e+06
P12236|ADT3_HUMAN;P12235|ADT1_HUMAN;V9GYG0|V9GYG0_HUMAN;Q9H0C2|ADT4_HUMAN	16	6	849.46	4.73014e-06	1.51702e-05	4.12607	0.999999	Competition	Control	P12236	732320	785431	539729	495236	633278	886500	1.75811e+06	1.59085e+06	3.98761e+06	3.47472e+06	3.86445e+06	2.12763e+06	1.7083e+06	1.64766e+06	1.56247e+06	1.07732e+06	1.22037e+06	1.02922e+06	593076	999843	411755	652937	594593	1.53726e+06	2.1745e+06	3.25603e+06	6.53149e+06	1.09495e+07	6.03914e+06	5.52507e+06	1.52352e+06	3.16533e+06	1.56247e+06	1.81974e+06	1.27608e+06	1.9512e+06
P14625|ENPL_HUMAN;A0A1W2PRR1|A0A1W2PRR1_HUMAN;H0YIV0|H0YIV0_HUMAN;Q58FF3|ENPLL_HUMAN;F8W026|F8W026_HUMAN;F8VPC7|F8VPC7_HUMAN	29	27	1651.81	4.86339e-06	1.53923e-05	8.67141	0.999999	Competition	Control	P14625	663367	787092	806160	1.05282e+06	746338	1.3893e+06	4.98345e+06	3.03808e+06	9.12257e+06	9.64267e+06	1.13818e+07	9.04793e+06	1.59023e+06	4.54018e+06	1.24125e+06	3.54603e+06	1.11995e+06	1.99438e+06	537234	1.00196e+06	615014	1.38808e+06	700746	2.40915e+06	6.16373e+06	6.21808e+06	1.49423e+07	3.03858e+07	1.77868e+07	2.34958e+07	1.41822e+06	8.72219e+06	1.24125e+06	5.98975e+06	1.17108e+06	3.78094e+06
P34932|HSP74_HUMAN;A0A087WYC1|A0A087WYC1_HUMAN;A0A087WTS8|A0A087WTS8_HUMAN	10	10	499.79	6.48493e-06	2.02579e-05	4.18111	0.999997	Competition	Control	P34932	191493	199339	192471	185117	240328	289485	748445	480817	1.13958e+06	559965	1.21439e+06	1.28486e+06	567283	564983	453984	393090	277131	353485	155083	253755	146835	244065	225647	501990	925706	984096	1.86657e+06	1.76455e+06	1.89777e+06	3.33654e+06	505921	1.08539e+06	453984	663984	289782	670135
A0A2U3TZU2|A0A2U3TZU2_HUMAN;K7EQ48|K7EQ48_HUMAN;A0A0J9YX90|A0A0J9YX90_HUMAN;K7EPY4|K7EPY4_HUMAN;K7ERC6|K7ERC6_HUMAN;K7EP41|K7EP41_HUMAN;A0A2R8YF08|A0A2R8YF08_HUMAN;K7ENA0|K7ENA0_HUMAN;K7ESF4|K7ESF4_HUMAN	11	11	479.55	6.8062e-06	2.09889e-05	11.7728	0.999996	Competition	Control	A0A2U3TZU2	99379.1	40769	112336	59244.6	110503	14480.1	894738	354105	1.45203e+06	485256	1.30035e+06	654823	518999	469701	397698	241748	288153	253850	80483	51898.3	85700.6	78110.3	103753	25109.7	1.10665e+06	724753	2.37835e+06	1.52913e+06	2.03212e+06	1.70046e+06	462860	902347	397698	408347	301307	481247
F8VZX2|F8VZX2_HUMAN;F8VXH9|F8VXH9_HUMAN;E9PFP8|E9PFP8_HUMAN;F8VRH0|F8VRH0_HUMAN;F8W1G6|F8W1G6_HUMAN;H3BND9|H3BND9_HUMAN;H3BSS4|H3BSS4_HUMAN	5	3	287.7	7.66264e-06	2.33308e-05	3.35771	0.999995	Competition	Control	F8VZX2	474813	692479	464288	396632	484318	462415	1.16055e+06	1.19368e+06	1.7857e+06	1.34322e+06	2.00135e+06	2.50449e+06	1.60025e+06	1.06763e+06	1.22782e+06	1.39418e+06	712790	799894	384532	881516	354202	522934	454733	801865	1.43542e+06	2.44313e+06	2.92487e+06	4.23273e+06	3.12759e+06	6.50371e+06	1.42716e+06	2.05103e+06	1.22782e+06	2.35496e+06	745329	1.51643e+06
G8JLB6|G8JLB6_HUMAN;E9PCY7|E9PCY7_HUMAN;H0YB39|H0YB39_HUMAN;P55795|HNRH2_HUMAN;H0YBD7|H0YBD7_HUMAN;D6RBM0|D6RBM0_HUMAN;D6RIT2|D6RIT2_HUMAN;D6R9T0|D6R9T0_HUMAN;E7EN40|E7EN40_HUMAN	6	5	496.82	7.85151e-06	2.36071e-05	3.64147	0.999995	Competition	Control	G8JLB6	586848	341455	791118	714239	660015	458388	1.52708e+06	1.64541e+06	3.19945e+06	2.89455e+06	1.95396e+06	1.71427e+06	1.21106e+06	1.18676e+06	1.12981e+06	634498	893961	1.22656e+06	475264	434668	603538	941679	619697	794883	1.88875e+06	3.36769e+06	5.24052e+06	9.12127e+06	3.05354e+06	4.45165e+06	1.08006e+06	2.2799e+06	1.12981e+06	1.07176e+06	934770	2.32531e+06
F8W914|F8W914_HUMAN;Q9NQC3|RTN4_HUMAN;H7C106|H7C106_HUMAN;A0A0U1RQR6|A0A0U1RQR6_HUMAN	8	8	449.79	7.9526e-06	2.36158e-05	9.99344	0.999995	Competition	Control	F8W914	768487	529873	747267	461373	695368	834234	2.32387e+06	4.53713e+06	9.62441e+06	1.01477e+07	3.70411e+06	1.00024e+07	2.46462e+06	4.26872e+06	1.21651e+06	1.69216e+06	1.10045e+06	1.03193e+06	622366	674521	570084	608292	652890	1.44663e+06	2.87425e+06	9.28622e+06	1.57643e+07	3.19771e+07	5.78858e+06	2.59744e+07	2.19803e+06	8.20068e+06	1.21651e+06	2.85829e+06	1.15069e+06	1.95632e+06
B8ZZA8|B8ZZA8_HUMAN;B8ZZC5|B8ZZC5_HUMAN	3	2	168.16	9.50104e-06	2.77257e-05	4.34015	0.999992	Competition	Control	B8ZZA8	27178.3	20369.6	14504.4	8606.31	19857.5	33363.2	63848.9	79005.1	74300.6	141966	114607	63927.1	41719.5	24452.9	31438.2	37206.5	33278	24776.1	22010.6	25930.2	11065.3	11346.9	18644.5	57854.6	78970.8	161701	121700	447362	179101	166007	37206.8	46976.8	31438.2	62847	34797.1	46970.3
Q8NHH1|TTL11_HUMAN	1	1	37.57	9.56713e-06	2.77257e-05	1.86459	0.999992	Probe	Competition	Q8NHH1	2.44141e+07	2.16588e+07	2.72509e+07	2.44128e+07	1.9652e+07	2.032e+07	1.67114e+07	1.3582e+07	1.47773e+07	9.71961e+06	1.56343e+07	1.08179e+07	2.53742e+07	2.67982e+07	2.36945e+07	2.07729e+07	2.49674e+07	2.98771e+07	1.9772e+07	2.75714e+07	2.07895e+07	3.21868e+07	1.84515e+07	3.52365e+07	2.06693e+07	2.77985e+07	2.42045e+07	3.06283e+07	2.44324e+07	2.8092e+07	2.26295e+07	5.14822e+07	2.36945e+07	3.50883e+07	2.61071e+07	5.66408e+07
Q15417|CNN3_HUMAN;E9PDU6|E9PDU6_HUMAN	2	1	59.8	1.02063e-05	2.92259e-05	11.7297	0.99999	Competition	Control	Q15417	9010.99	29211.9	9189.69	13071.9	15371.1	27633.7	71332.9	106167	173338	298534	256895	307629	64449.9	67885.7	45099.8	42792	13749.5	63554.5	7297.63	37186.3	7010.74	17234.5	14432.1	47919.1	88227.3	217293	283919	940736	401461	798857	57478.5	130416	45099.8	72281.7	14377.1	120486
P24390|ERD21_HUMAN;M0R1Y2|M0R1Y2_HUMAN	2	1	241.39	1.07245e-05	3.03486e-05	8.74882	0.999989	Competition	Control	P24390	276623	210358	268393	254362	270073	247303	1.49455e+06	560815	3.04486e+06	2.88345e+06	3.21625e+06	2.1605e+06	844022	285544	810888	358337	396381	241886	224026	267783	204755	335360	253575	428843	1.84852e+06	1.14783e+06	4.98731e+06	9.08628e+06	5.02618e+06	5.61042e+06	752726	548561	810888	605281	414476	458565
P07737|PROF1_HUMAN;K7EJ44|K7EJ44_HUMAN;I3L3D5|I3L3D5_HUMAN	6	6	408.99	1.13739e-05	3.18118e-05	3.32601	0.999987	Competition	Control	P07737	3.37725e+06	3.37574e+06	3.19534e+06	4.3843e+06	3.86322e+06	4.74858e+06	9.47824e+06	1.0741e+07	1.28772e+07	1.94956e+07	1.16079e+07	1.21136e+07	5.79873e+06	1.15418e+07	5.90744e+06	1.28319e+07	5.36228e+06	6.0102e+06	2.73509e+06	4.29727e+06	2.4377e+06	5.78043e+06	3.62723e+06	8.23444e+06	1.17231e+07	2.19838e+07	2.10921e+07	6.14342e+07	1.81401e+07	3.14568e+07	5.1715e+06	2.2173e+07	5.90744e+06	2.16748e+07	5.60707e+06	1.13941e+07
P21964|COMT_HUMAN;E7EMS6|E7EMS6_HUMAN;E7EUU8|E7EUU8_HUMAN	4	4	223.18	1.16061e-05	3.20883e-05	5.71197	0.999986	Competition	Control	P21964	73530.2	48374.8	67706.9	48218.4	68365.5	71112.6	366865	379031	265809	169277	531299	442893	185029	176418	185254	47707.5	93370.1	113943	59549.1	61580.5	51653.1	63572.9	64189.2	123315	453753	775770	435381	533423	830284	1.15011e+06	165015	338919	185254	80584.6	97632.5	216013
Q15293|RCN1_HUMAN;E9PP27|E9PP27_HUMAN	13	13	883.18	1.19021e-05	3.23361e-05	30.61	0.999986	Competition	Control	Q15293	83054	74885.1	83339.3	89755.7	53042.8	215222	1.89446e+06	460645	1.48847e+06	1.75579e+06	4.85022e+06	7.89498e+06	437303	809405	128725	350375	132838	374682	67262.1	95327.7	63578.9	118337	49802.5	373213	2.34314e+06	942809	2.43802e+06	5.5328e+06	7.57965e+06	2.05018e+07	390001	1.55495e+06	128725	591832	138902	710320
O15427|MOT4_HUMAN	2	2	162.39	1.19646e-05	3.23361e-05	5.31212	0.999985	Probe	Control	O15427	64376.5	105252	52187.9	70425.1	56560	407070	510824	354381	900460	680427	891264	483775	767476	849816	674455	848700	479468	395367	52135.9	133985	39813.8	92851	53104.9	705894	631807	725318	1.4749e+06	2.14415e+06	1.39282e+06	1.25628e+06	684460	1.63259e+06	674455	1.43357e+06	501356	749534
Q9Y6K5|OAS3_HUMAN;F8VS35|F8VS35_HUMAN;F8VWK9|F8VWK9_HUMAN;H0YHL3|H0YHL3_HUMAN	21	20	814.71	1.22718e-05	3.27977e-05	7.02629	0.999984	Competition	Control	Q9Y6K5	195789	157320	186846	152962	198298	204803	950649	1.3377e+06	1.68773e+06	442849	1.36619e+06	1.91582e+06	731534	275370	669789	204692	351988	217773	158561	200266	142543	201671	186185	355146	1.1758e+06	2.7379e+06	2.76441e+06	1.3955e+06	2.135e+06	4.97503e+06	652406	529015	669789	345754	368057	412853
O43707|ACTN4_HUMAN;F5GXS2|F5GXS2_HUMAN;H7C144|H7C144_HUMAN;K7EJH8|K7EJH8_HUMAN;K7EP19|K7EP19_HUMAN;C9JY79|C9JY79_HUMAN	29	14	1678.12	1.30737e-05	3.45569e-05	3.0563	0.999982	Competition	Control	O43707	788631	695378	733435	950772	802901	1.09932e+06	1.77781e+06	5.05619e+06	2.02953e+06	2.07347e+06	2.34997e+06	2.20981e+06	1.12412e+06	1.33452e+06	1.13657e+06	1.35152e+06	800472	1.15324e+06	638679	885207	559532	1.25353e+06	753854	1.90632e+06	2.19886e+06	1.03486e+07	3.32426e+06	6.53389e+06	3.6724e+06	5.73848e+06	1.00253e+06	2.56375e+06	1.13657e+06	2.28291e+06	837014	2.18631e+06
P62244|RS15A_HUMAN;I3L3P7|I3L3P7_HUMAN;I3L246|I3L246_HUMAN;H3BT37|H3BT37_HUMAN;H3BVC7|H3BVC7_HUMAN	5	3	290.5	1.38204e-05	3.61336e-05	6.56528	0.99998	Competition	Control	P62244	198832	162174	169445	186159	238536	102370	604324	459913	1.44142e+06	1.53211e+06	1.46274e+06	1.44238e+06	398423	865748	478040	616948	306612	256327	161025	206446	129268	245438	223965	177518	747451	941311	2.36096e+06	4.82797e+06	2.28589e+06	3.74559e+06	355326	1.6632e+06	478040	1.04211e+06	320608	485943
Q6NUK1|SCMC1_HUMAN	2	2	71.43	1.43041e-05	3.69963e-05	9.47292	0.999978	Competition	Control	Q6NUK1	6713.93	24312.1	7791.21	22654.5	8026.04	9268.69	54086.5	124083	131291	191605	102999	142084	76192	190202	77260.5	20827.4	49511	62315.5	5437.34	30949	5943.85	29868.6	7535.75	16072.7	66896.3	253962	215048	603783	160962	368966	67950.4	365398	77260.5	35180.3	51771.1	118137
Q00325|MPCP_HUMAN	9	1	343.47	1.55321e-05	3.97448e-05	3.97494	0.999973	Competition	Control	Q00325	482611	422472	503118	577492	335930	331203	1.57851e+06	1.4017e+06	2.22795e+06	1.44369e+06	2.31135e+06	1.58163e+06	1.24721e+06	1.60769e+06	1.03306e+06	402274	831882	1.32828e+06	390847	537800	383825	761387	315409	574333	1.95236e+06	2.86889e+06	3.64926e+06	4.54932e+06	3.61204e+06	4.1072e+06	1.1123e+06	3.08854e+06	1.03306e+06	679496	869858	2.51815e+06
O15173|PGRC2_HUMAN;U3KQM0|U3KQM0_HUMAN	4	3	182.65	1.60216e-05	4.04789e-05	6.30376	0.999971	Competition	Control	O15173	193639	217471	200419	160449	494059	187572	1.11132e+06	1.06579e+06	1.23698e+06	1.77066e+06	1.55402e+06	2.42443e+06	1.1237e+06	1.10151e+06	562146	655598	211377	616591	156820	276837	152898	211541	463878	325266	1.37452e+06	2.18137e+06	2.02611e+06	5.57968e+06	2.42853e+06	6.29581e+06	1.00215e+06	2.11613e+06	562146	1.1074e+06	221027	1.16893e+06
O00410|IPO5_HUMAN;H0Y8C6|H0Y8C6_HUMAN;E7ETV3|E7ETV3_HUMAN;C9JQT6|C9JQT6_HUMAN;E7EQT5|E7EQT5_HUMAN;H0Y3V4|H0Y3V4_HUMAN;C9J875|C9J875_HUMAN;O60518|RNBP6_HUMAN	15	15	819.13	1.62229e-05	4.04789e-05	6.97268	0.99997	Competition	Control	O00410	81805.5	137569	61148	61772.3	95366	55518.9	442900	294121	345073	564657	852989	939043	168007	348940	219573	63727.9	181840	181481	66250.9	175124	46649.3	81442.9	89540.3	96274.3	547796	601983	565211	1.77934e+06	1.333e+06	2.43852e+06	149834	670351	219573	107645	190141	344050
P16278|BGAL_HUMAN;E7EQ29|E7EQ29_HUMAN;C9J4G9|C9J4G9_HUMAN;C9J539|C9J539_HUMAN;C9JF15|C9JF15_HUMAN	6	6	232.1	1.63238e-05	4.04789e-05	3.78592	0.99997	Probe	Control	P16278	154360	175875	120443	136472	161561	345446	126923	250400	322224	422228	220572	237761	731805	919121	838175	625279	531303	496718	125010	223887	91885.3	179930	151692	599032	156984	512497	527785	1.33052e+06	344697	617422	652647	1.76573e+06	838175	1.05618e+06	555557	941674
B5ME19|EIFCL_HUMAN	3	3	216.85	1.69608e-05	4.16151e-05	6.60447	0.999967	Competition	Control	B5ME19	14554	16605.7	45593.7	44396.1	26414.1	24162.7	167721	147558	221842	172242	336074	88724	69604.2	50950.9	83313.7	20007.6	50929.5	35704.5	11786.7	21138.9	34783.1	58533.5	24800.6	41900	207444	302010	363365	542766	525197	230400	62075.3	97882.3	83313.7	33795.6	53254.4	67688.4
H0YDJ9|H0YDJ9_HUMAN	2	2	106.85	1.72446e-05	4.16151e-05	7.55224	0.999966	Competition	Control	H0YDJ9	49395.7	50098.7	72508.6	43518.4	54498.3	74033.2	225901	226069	670701	116721	573460	785518	376423	417673	323904	185141	212957	401585	40003.6	63774.9	55316.2	57376.3	51169.1	128380	279403	462698	1.09857e+06	367809	896171	2.03985e+06	335706	802395	323904	312728	222678	761322
P46977|STT3A_HUMAN;A0A0C4DH80|A0A0C4DH80_HUMAN;H0YET6|H0YET6_HUMAN	10	9	399.38	1.74544e-05	4.16151e-05	5.70976	0.999965	Competition	Control	P46977	154957	180185	206374	178216	120159	59788.7	525758	391369	795534	883941	1.06547e+06	1.47489e+06	362004	455404	290974	190493	209223	284379	125494	229374	157441	234966	112819	103678	650277	801022	1.30304e+06	2.78546e+06	1.66505e+06	3.83003e+06	322847	874880	290974	321769	218774	539123
C9JW96|C9JW96_HUMAN;C9JZ20|C9JZ20_HUMAN;D6RBK0|D6RBK0_HUMAN	8	8	457.58	1.7474e-05	4.16151e-05	10.9309	0.999965	Competition	Control	C9JW96	67435.2	39312.9	66090	44965.7	98639.7	40341	522163	382753	920157	131161	981318	962411	335372	192995	270432	111243	136866	209741	54613	50044.7	50419.5	59284.4	92614.1	69954.6	645832	783387	1.50717e+06	413311	1.53355e+06	2.49921e+06	299095	370764	270432	187905	143114	397626
P05198|IF2A_HUMAN;G3V4T5|G3V4T5_HUMAN	3	3	148.61	1.85802e-05	4.38156e-05	2.68952	0.99996	Competition	Control	P05198	129715	171227	186411	149352	157138	154993	403487	353151	440180	473487	535842	345765	296230	295723	294124	125861	197122	155097	105051	217970	142211	196912	147539	268772	499048	722800	720990	1.49204e+06	837383	897889	264188	568117	294124	212597	206121	294033
Q92598|HS105_HUMAN;A0A0A0MSM0|A0A0A0MSM0_HUMAN;D6RJ96|D6RJ96_HUMAN;R4GN69|R4GN69_HUMAN	9	8	375.98	1.89815e-05	4.43275e-05	4.36852	0.999958	Competition	Control	Q92598	103437	73541.2	115127	98712	90420.8	53779.1	302091	528594	291452	298449	467836	448814	240115	114201	158983	70486.2	192307	273794	83769.1	93617	87829.9	130146	84897.3	93257.4	373638	1.08188e+06	477382	940466	731107	1.16549e+06	214142	219393	158983	119061	201085	519057
C9J7K9|C9J7K9_HUMAN;C9J9P4|C9J9P4_HUMAN;C9J0H3|C9J0H3_HUMAN	4	3	150.98	2.1011e-05	4.8595e-05	6.32036	0.999948	Competition	Control	C9J7K9	149331	131589	210022	169885	162581	104431	628150	320262	1.24675e+06	874225	1.55265e+06	1.24224e+06	621691	1.639e+06	1.19278e+06	311789	737154	879986	120937	167511	160224	223982	152649	181092	776920	655487	2.04211e+06	2.75484e+06	2.4264e+06	3.22586e+06	554444	3.1487e+06	1.19278e+06	526655	770805	1.66827e+06
A0A0G2JJA7|A0A0G2JJA7_HUMAN;A0A0G2JJQ0|A0A0G2JJQ0_HUMAN	3	3	107.63	2.26634e-05	5.19176e-05	19.9434	0.999938	Competition	Control	A0A0G2JJA7	8703.13	10360.9	4100.14	3796.41	1526.58	6790.17	103236	79738.3	127209	18833.8	224115	150416	18581.9	1534.79	9610.38	10598.3	6714.51	3755.84	7048.31	13189.2	3127.97	5005.32	1433.32	11774.7	127686	163202	208362	59348.8	350234	390602	16572	2948.5	9610.38	17902	7021.03	7120.3
Q15008|PSMD6_HUMAN;C9J0E9|C9J0E9_HUMAN;H7C531|H7C531_HUMAN	3	3	207.56	2.29267e-05	5.20254e-05	2.88825	0.999937	Competition	Control	Q15008	128200	164732	222378	135579	131540	101961	370711	264455	525884	484568	512353	396370	248428	208717	330030	256534	154892	169705	103824	209702	169650	178752	123505	176809	458510	541264	861370	1.52696e+06	800675	1.0293e+06	221556	400968	330030	433322	161963	321725
Q8IV08|PLD3_HUMAN;M0R1F7|M0R1F7_HUMAN;E2QRG1|E2QRG1_HUMAN;M0R3G9|M0R3G9_HUMAN	6	5	246	2.3194e-05	5.214e-05	6.20315	0.999935	Competition	Control	Q8IV08	692955	100135	111326	77836.4	172640	53745.9	651091	969973	1.29097e+06	1.69033e+06	1.49581e+06	1.39918e+06	970577	1.50113e+06	1.08913e+06	1.54645e+06	785625	469972	561195	127470	84929.6	102622	162094	93199.9	805294	1.98526e+06	2.11454e+06	5.32654e+06	2.33756e+06	3.63343e+06	865592	2.88383e+06	1.08913e+06	2.61216e+06	821489	890970
G5E994|G5E994_HUMAN;U3KQD2|U3KQD2_HUMAN	3	3	145.54	2.37853e-05	5.2974e-05	7.99186	0.999931	Probe	Control	G5E994	57292.3	47558.6	84320	40200.5	61561.1	83812.2	179201	248800	464624	456409	354944	142293	740244	623367	605344	111343	390682	523929	46398.7	60541.4	64327.1	53001.9	57800.6	145337	221642	509223	761029	1.43823e+06	554687	369509	660174	1.19756e+06	605344	188074	408517	993261
P84095|RHOG_HUMAN	3	3	122.28	2.45842e-05	5.42511e-05	8.78471	0.999927	Competition	Control	P84095	16684.6	14356.6	20281.9	40991.7	12924	23627.9	156549	35442.2	246521	239470	265519	188557	95512.7	90103.9	103360	117146	42818.9	99297.9	13512.2	18275.8	15472.9	54044.9	12134.5	40972.7	193626	72540.2	403787	754612	414938	489647	85181.3	173099	103360	197876	44773.6	188248
P09211|GSTP1_HUMAN;A8MX94|A8MX94_HUMAN;A0A087X2E9|A0A087X2E9_HUMAN;A0A087X243|A0A087X243_HUMAN	9	9	574.15	2.58975e-05	5.66296e-05	4.65033	0.999918	Competition	Control	P09211	781442	623186	540289	676915	664097	926691	3.04645e+06	3.44669e+06	3.77218e+06	1.60812e+06	5.69522e+06	2.0214e+06	1.93095e+06	2.05908e+06	1.68141e+06	748396	1.20328e+06	873850	632858	793306	412182	892470	623530	1.60696e+06	3.76797e+06	7.0544e+06	6.17862e+06	5.06748e+06	8.90016e+06	5.2492e+06	1.72208e+06	3.95571e+06	1.68141e+06	1.26414e+06	1.25821e+06	1.65664e+06
K4DIA7|K4DIA7_HUMAN;E9PJC8|E9PJC8_HUMAN	2	1	89.51	2.70006e-05	5.851e-05	15.3086	0.999911	Competition	Control	K4DIA7	7894.89	5575.44	5943.68	20464.5	5599.25	18187	97424.2	109560	204992	206603	216800	139240	241012	179214	127271	186283	10149.2	140050	6393.75	7097.46	4534.38	26981.2	5257.21	31537.8	120498	224239	335765	651045	338803	361582	214942	344290	127271	314659	10612.5	265506
E9PLK3|E9PLK3_HUMAN;A6NEC2|PSAL_HUMAN;E9PP11|E9PP11_HUMAN;H0YDG0|H0YDG0_HUMAN;E9PJ74|E9PJ74_HUMAN;E9PJY4|E9PJY4_HUMAN;H0YCQ5|H0YCQ5_HUMAN	23	23	931.82	2.75974e-05	5.92693e-05	5.77779	0.999906	Competition	Control	E9PLK3	82554.4	149561	78392.8	245244	81101	359195	801631	476478	673341	770168	1.31093e+06	1.72242e+06	129269	137880	120665	319170	114550	239078	66857.4	190389	59805.2	323339	76146.8	622874	991488	975216	1.1029e+06	2.42694e+06	2.04864e+06	4.4728e+06	115286	264882	120665	539122	119779	453242
O15269|SPTC1_HUMAN	2	2	77.35	2.79089e-05	5.94077e-05	15.1934	0.999904	Competition	Control	O15269	24974.8	9677.25	13778.1	19403.8	18582.7	31542.1	158452	209950	400575	221839	400808	400566	59224.9	859243	118071	140261	36661.1	244101	20226.1	12319	10511.2	25582.6	17447.6	54696.7	195980	429709	656120	699055	626360	1.0402e+06	52818.7	1.6507e+06	118071	236921	38334.6	462766
O75083|WDR1_HUMAN;D6RD66|D6RD66_HUMAN	8	8	372.26	2.94718e-05	6.21843e-05	3.23108	0.999893	Competition	Control	O75083	78188.8	84925.6	124632	120523	119339	105664	400914	169640	319245	308834	519881	327641	156182	84598.7	172881	201549	134138	109332	63321.9	108109	95080.9	158903	112049	183230	495866	347206	522906	973193	812441	850824	139288	162523	172881	340444	140261	207270
Q00765|REEP5_HUMAN;B7Z332|B7Z332_HUMAN	2	2	102.52	3.06948e-05	6.42016e-05	4.26516	0.999884	Probe	Control	Q00765	157661	110372	94958.9	130574	94654.8	63009	196711	162938	512432	481096	403969	590649	696528	479655	545148	417845	316533	321890	127683	140501	72443.4	172154	88872.7	109263	243300	333487	839335	1.51602e+06	631300	1.53381e+06	621186	921470	545148	705799	330982	610237
P49748|ACADV_HUMAN;J3KS89|J3KS89_HUMAN;J3KSR4|J3KSR4_HUMAN;J3QRJ8|J3QRJ8_HUMAN;K7EJW8|K7EJW8_HUMAN	7	6	297.52	3.10024e-05	6.42859e-05	6.10997	0.999881	Competition	Control	P49748	70483.1	37528	47031	28286.9	39161.8	18737.2	269047	127529	300871	161720	428054	186676	156151	151600	153688	46192.7	98749.8	68827	57081.4	47772.6	35879.6	37294.4	36769.5	32491.8	332768	261015	492810	509608	668939	484763	139260	291240	153688	78025.9	103258	130482
Q8IY34|S15A3_HUMAN;F5H1C8|F5H1C8_HUMAN;H0YFC1|H0YFC1_HUMAN	2	2	38	3.17515e-05	6.52766e-05	18.4904	0.999875	Competition	Control	Q8IY34	9222.53	35832.7	2217.6	17717.9	18804	30026.3	111824	126093	273750	363962	486654	742312	65013	175980	74442	41967.1	56176.1	71450.3	7468.94	45614.6	1691.79	23360	17655.3	52068.2	138309	258076	448387	1.14691e+06	760515	1.92765e+06	57980.7	338077	74442	70888.3	58740.6	135455
Q9Y5S1|TRPV2_HUMAN;H7BZK2|H7BZK2_HUMAN	5	5	215.34	3.2255e-05	6.57498e-05	9.55068	0.999871	Competition	Control	Q9Y5S1	8923.53	11198.5	11657.1	5051.37	6206.91	16192.1	42086.6	93026.8	153669	102684	149257	24960.2	51385.6	89783.2	42773.4	18508.6	34642	50147.8	7226.8	14255.6	8893.13	6659.92	5827.75	28078.5	52054.3	190400	251701	323575	233250	64817	45827.4	172483	42773.4	31263.6	36223.4	95069.8
A0A0A0MSV9|A0A0A0MSV9_HUMAN;Q6P1N7|Q6P1N7_HUMAN;C9JA35|C9JA35_HUMAN;A0A0A0MT98|A0A0A0MT98_HUMAN	4	4	140.27	3.33402e-05	6.73908e-05	9.69667	0.999862	Competition	Control	A0A0A0MSV9	30731.7	31325	54850.1	31161.9	40872.3	24288.9	205356	239237	579080	326896	424174	292876	90071.1	14604.5	131695	174561	51076.5	124564	24888.3	39876.2	41844.7	41084.9	38375.5	42118.9	253992	489651	948501	1.03011e+06	662874	760546	80328.3	28056.8	131695	294857	53408.1	236147
P63000|RAC1_HUMAN;B1AH78|B1AH78_HUMAN	3	2	109.35	3.5297e-05	7.04023e-05	7.38247	0.999846	Competition	Control	P63000	29853.3	19692	20662.1	35003	12247	7444.21	96723.3	115042	95243	328845	217415	68812.7	43243.7	25067.5	59414.6	63009.3	32445.6	35289.7	24176.9	25067.6	15762.9	46149.3	11498.8	12908.9	119631	235459	156003	1.03625e+06	339764	178694	38566.2	48157.4	59414.6	106431	33926.7	66901.9
J3KSP2|J3KSP2_HUMAN	1	1	75.38	3.55689e-05	7.04023e-05	9.00113	0.999843	Competition	Control	J3KSP2	11313.5	9973.6	12141.6	22133	2481.62	19458.8	87794.4	72840.5	114925	151721	98984.1	171342	29137.7	57734.2	62708.2	54348.1	12549.3	22189.4	9162.35	12696.3	9262.76	29181	2330.03	33743.2	108588	149084	188242	478101	154687	444944	25986	110914	62708.2	91801.5	13122.1	42066.5
O14980|XPO1_HUMAN;C9IZS4|C9IZS4_HUMAN;C9IYM2|C9IYM2_HUMAN	6	6	245.73	3.58364e-05	7.04023e-05	5.7734	0.999841	Competition	Control	O14980	29809.7	27115.2	28098.4	29419.7	22729.2	95699.8	168411	235474	103828	176534	398500	261715	122573	52999.4	106785	129095	156642	227197	24141.6	34517.3	21436	38788	21340.7	165951	208297	481948	170064	556290	622753	679627	109314	101818	106785	218060	163793	430718
P06576|ATPB_HUMAN;H0YH81|H0YH81_HUMAN;F8W079|F8W079_HUMAN;F8W0P7|F8W0P7_HUMAN;H0YI37|H0YI37_HUMAN	18	18	1122.61	3.60659e-05	7.04023e-05	2.53921	0.999839	Competition	Control	P06576	2.85176e+06	1.66746e+06	2.53319e+06	2.28944e+06	2.83232e+06	3.82874e+06	4.83659e+06	4.91824e+06	7.79195e+06	6.19356e+06	7.23275e+06	9.66166e+06	3.93557e+06	4.37908e+06	3.65014e+06	5.36338e+06	3.3563e+06	3.53946e+06	2.30953e+06	2.12265e+06	1.93255e+06	3.01848e+06	2.6593e+06	6.63935e+06	5.98208e+06	1.00662e+07	1.27628e+07	1.9517e+07	1.13029e+07	2.50896e+07	3.50987e+06	8.41268e+06	3.65014e+06	9.0595e+06	3.50951e+06	6.71008e+06
P04792|HSPB1_HUMAN;C9J3N8|C9J3N8_HUMAN;F8WE04|F8WE04_HUMAN	5	5	246.89	3.64261e-05	7.04023e-05	16.4177	0.999836	Competition	Control	P04792	129204	103846	91549.4	77719	127982	35615.8	1.58487e+06	966583	3.56042e+06	207189	1.36709e+06	1.60488e+06	258547	253532	195894	46662.4	163252	116200	104637	132195	69842.3	102468	120164	61760.8	1.96023e+06	1.97832e+06	5.83177e+06	652890	2.13641e+06	4.16757e+06	230581	487063	195894	78819.4	170704	220291
Q9Y696|CLIC4_HUMAN	2	2	116.57	3.65862e-05	7.04023e-05	3.10889	0.999834	Competition	Control	Q9Y696	78155.8	42381.7	81151.1	116756	55730	59689.3	171232	225049	195187	177841	192167	387360	114569	79218.6	84837.4	84920.8	116117	150082	63295.2	53951.2	61909.5	153935	52325.6	103506	211787	460611	319706	560408	300308	1.0059e+06	102176	152188	84837.4	143443	121418	284525
A0A087WWW9|A0A087WWW9_HUMAN	1	1	34.23	3.81983e-05	7.2921e-05	3.08439	0.99982	Control	Competition	A0A087WWW9	902735	1.12055e+06	621412	1.2312e+06	901973	700088	388217	275211	206723	201412	225571	478894	414260	692913	595734	735793	528537	1.0324e+06	731088	1.42644e+06	474070	1.62326e+06	846874	1.21401e+06	480161	563279	338602	634686	352509	1.2436e+06	369450	1.33116e+06	595734	1.24286e+06	552665	1.95722e+06
Q96HC4|PDLI5_HUMAN;H0Y8Y3|H0Y8Y3_HUMAN;A0A0A0MSP3|A0A0A0MSP3_HUMAN;A0A0D9SFR4|A0A0D9SFR4_HUMAN	9	9	305.88	3.87948e-05	7.34766e-05	6.29784	0.999814	Competition	Control	Q96HC4	21412.7	42092.6	28614	23105.5	19822.7	5596.15	101004	117241	118695	114484	272322	162004	39884.9	49994.2	56307.6	29775.1	30608.2	92967.7	17341.3	53583.3	21829.4	30463.2	18611.8	9704.19	124926	239960	194416	360759	425570	420696	35570.7	96044.3	56307.6	50294.2	32005.5	176248
O75396|SC22B_HUMAN;A0A087X1A9|A0A087X1A9_HUMAN	4	4	271.78	4.26318e-05	8.01129e-05	13.0312	0.999777	Competition	Control	O75396	131941	102192	70806.7	76648.8	88739.3	145777	1.23602e+06	493668	1.83426e+06	902773	1.96341e+06	1.59843e+06	711894	800014	451883	52517.9	305920	306410	106854	130089	54017.9	101057	83318.5	252789	1.52876e+06	1.0104e+06	3.00442e+06	2.8448e+06	3.06831e+06	4.15084e+06	634890	1.53691e+06	451883	88710.1	319886	580890
Q06830|PRDX1_HUMAN;A0A0A0MSI0|A0A0A0MSI0_HUMAN;A0A0A0MRQ5|A0A0A0MRQ5_HUMAN	11	9	564.81	4.32945e-05	8.07277e-05	3.40926	0.99977	Competition	Control	Q06830	955197	970664	801954	630354	905351	465637	2.29227e+06	2.32171e+06	2.14415e+06	2.32168e+06	2.75569e+06	4.28741e+06	1.6358e+06	662493	1.51631e+06	541051	948794	1.24471e+06	773574	1.23564e+06	611805	831082	850046	807453	2.83517e+06	4.75188e+06	3.51199e+06	7.31603e+06	4.30644e+06	1.11336e+07	1.45886e+06	1.27272e+06	1.51631e+06	913911	992107	2.35971e+06
P17813|EGLN_HUMAN;F5GX88|F5GX88_HUMAN	4	4	212.84	4.45378e-05	8.2407e-05	35.0973	0.999757	Competition	Control	P17813	6551.37	5546.1	8309.22	5999.47	5531.57	16447.5	73352.2	16277.8	569530	394663	314279	330090	245259	185596	114188	62933.2	57711.5	53976.7	5305.69	7060.11	6339.04	7909.92	5193.66	28521.4	90724.8	33316.1	932859	1.24366e+06	491138	857183	218730	356550	114188	106303	60346.1	102329
E5RGA2|E5RGA2_HUMAN;H0YAW4|H0YAW4_HUMAN;H0YBR5|H0YBR5_HUMAN	3	3	82.24	4.533e-05	8.28255e-05	7.64185	0.999749	Competition	Control	E5RGA2	5933.67	7183.57	10893.9	4530.1	4426.15	11612.4	29556.4	41240.2	71416.7	65536.7	83095.6	49826.5	25516.8	42977.4	16730.8	4735.89	9225.9	15134.2	4805.43	9144.59	8310.85	5972.65	4155.77	20136.9	36556.5	84407	116977	206518	129857	129390	22756.7	82564.3	16730.8	7999.58	9647.06	28691.2
A0A3B3IRI2|A0A3B3IRI2_HUMAN;A0A3B3IRQ8|A0A3B3IRQ8_HUMAN;A0A3B3ISY3|A0A3B3ISY3_HUMAN	3	2	124.2	4.54741e-05	8.28255e-05	25.926	0.999748	Competition	Control	A0A3B3IRI2	6210.44	14263.4	3793.42	2944.03	6449.56	4444.39	241840	31645.5	144584	93309.8	272898	203640	64120.6	37400.6	77964.2	147382	60340.8	5309.88	5029.58	18157.1	2893.97	3881.52	6055.58	7706.94	299117	64769.3	236820	294036	426469	528815	57184.8	71850.6	77964.2	248948	63095.3	10066.4
P02042|HBD_HUMAN;A0A2R8Y7R2|A0A2R8Y7R2_HUMAN;A0A2R8Y7X9|A0A2R8Y7X9_HUMAN	4	4	216.65	4.5797e-05	8.28255e-05	2.74809	0.999744	Control	Competition	P02042	9.62808e+07	1.00317e+08	8.65083e+07	1.26428e+08	6.02627e+07	7.58596e+07	3.48681e+07	3.07288e+07	2.69311e+07	2.63587e+07	3.94159e+07	4.02559e+07	1.21465e+08	7.31208e+07	4.83903e+07	5.22517e+07	1.08518e+08	1.10092e+08	7.79739e+07	1.27703e+08	6.59965e+07	1.66687e+08	5.65814e+07	1.31547e+08	4.31262e+07	6.28931e+07	4.41117e+07	8.30611e+07	6.15969e+07	1.04537e+08	1.08326e+08	1.40473e+08	4.83903e+07	8.82604e+07	1.13472e+08	2.08712e+08
F8VVM2|F8VVM2_HUMAN;F8VWQ0|F8VWQ0_HUMAN;F8VWR4|F8VWR4_HUMAN	9	1	351.24	4.80221e-05	8.62016e-05	3.67408	0.99972	Competition	Control	F8VVM2	56882.3	51499.8	62319.7	51109.1	40907	44362.2	139317	107462	334067	143874	259312	144207	92838.2	111947	123265	47162.6	84425.4	72459.3	46066.6	65558.5	47543.2	67384.1	38408.1	76927.7	172312	219943	547183	453373	405239	374478	82796.1	215063	123265	79664.1	88279.4	137368
O43852|CALU_HUMAN;H0Y875|H0Y875_HUMAN	13	13	890.45	4.94319e-05	8.8075e-05	3.37274	0.999705	Competition	Control	O43852	401215	286195	429155	496567	366355	526876	1.16971e+06	525737	1.28918e+06	1.72002e+06	1.9587e+06	1.78996e+06	423928	654069	424163	445920	336146	243177	324928	364323	327399	654692	343975	913646	1.44674e+06	1.07603e+06	2.11161e+06	5.4201e+06	3.06094e+06	4.64819e+06	378073	1.25654e+06	424163	753221	351491	461013
F8VNT9|F8VNT9_HUMAN	1	1	49.38	5.22023e-05	9.11293e-05	22.6617	0.999673	Probe	Control	F8VNT9	7843.4	5632.1	10409.2	4659.44	4372.99	4316.77	44669.8	64908.6	102269	80372.9	95822.1	27095.4	238262	242928	167023	8344.14	85900.7	101324	6352.05	7169.59	7941.1	6143.18	4105.86	7485.64	55249.4	132849	167510	253270	149745	70361.8	212490	466691	167023	14094.4	89822	192090
P62829|RL23_HUMAN;J3KTJ3|J3KTJ3_HUMAN;B9ZVP7|B9ZVP7_HUMAN	3	3	141.99	5.22095e-05	9.11293e-05	2.49092	0.999673	Competition	Control	P62829	1.2738e+06	1.68489e+06	1.11365e+06	1.5935e+06	1.55602e+06	2.82737e+06	3.79448e+06	4.35828e+06	3.92913e+06	4.06394e+06	4.06923e+06	4.81674e+06	2.62078e+06	3.84761e+06	3.24264e+06	4.36575e+06	1.85737e+06	2.52204e+06	1.0316e+06	2.14484e+06	849597	2.10093e+06	1.46097e+06	4.90289e+06	4.69316e+06	8.92016e+06	6.4357e+06	1.28062e+07	6.35916e+06	1.25082e+07	2.33729e+06	7.39167e+06	3.24264e+06	7.37436e+06	1.94215e+06	4.78127e+06
P08238|HS90B_HUMAN;Q58FF7|H90B3_HUMAN;Q58FF8|H90B2_HUMAN;Q58FG1|HS904_HUMAN	34	18	2216.76	5.22827e-05	9.11293e-05	3.28758	0.999672	Competition	Control	P08238	2.19852e+06	1.63278e+06	1.74385e+06	1.66831e+06	1.78016e+06	2.1451e+06	5.49747e+06	6.33712e+06	7.04334e+06	7.17567e+06	8.54683e+06	2.11762e+06	5.45667e+06	5.97028e+06	4.24275e+06	3.95192e+06	4.38854e+06	3.53532e+06	1.78049e+06	2.0785e+06	1.33037e+06	2.19956e+06	1.67142e+06	3.71979e+06	6.79948e+06	1.29703e+07	1.15366e+07	2.26118e+07	1.33565e+07	5.49909e+06	4.86644e+06	1.14696e+07	4.24275e+06	6.67535e+06	4.58888e+06	6.70223e+06
P20591|MX1_HUMAN;F8W8T1|F8W8T1_HUMAN;H9KVC7|H9KVC7_HUMAN;H9KVC4|H9KVC4_HUMAN;C9JEL4|C9JEL4_HUMAN;C9JS04|C9JS04_HUMAN;H9KVD3|H9KVD3_HUMAN	27	24	1946.77	5.37309e-05	9.29798e-05	3.45864	0.999655	Competition	Control	P20591	1.5446e+06	660104	1.22663e+06	894397	1.6938e+06	2.36388e+06	4.73584e+06	3.81111e+06	5.91818e+06	2.67927e+06	7.04415e+06	4.8067e+06	2.06208e+06	2.22937e+06	2.73276e+06	1.88401e+06	2.62134e+06	3.11646e+06	1.25091e+06	840303	935790	1.17921e+06	1.59033e+06	4.09917e+06	5.85748e+06	7.80026e+06	9.69365e+06	8.44288e+06	1.10082e+07	1.24821e+07	1.83903e+06	4.28287e+06	2.73276e+06	3.18236e+06	2.741e+06	5.90816e+06
Q07666|KHDR1_HUMAN	3	3	58.94	5.62895e-05	9.67116e-05	17.3789	0.999624	Competition	Control	Q07666	3972.66	4278.48	11764.1	22048.4	12366.4	6014.29	28999.3	380212	135549	76650.5	140053	288991	25948.8	8761.62	27624.8	37846.5	7852.33	26109.6	3217.29	5446.44	8974.73	29069.4	11610.9	10429.3	35867.5	778186	222022	241540	218867	750457	23142	16832	27624.8	63928	8210.79	49498.3
B4DY09|B4DY09_HUMAN;X6R6Z1|X6R6Z1_HUMAN;A0A0A0MRL0|A0A0A0MRL0_HUMAN	5	5	206.06	5.80196e-05	9.89771e-05	8.29743	0.999603	Competition	Control	B4DY09	74850.7	118612	40825	70976.7	66398.5	137551	348572	639582	1.27473e+06	982427	490305	489543	179850	765827	144293	351640	94920.6	160567	60618.5	150991	31145.1	93578.3	62342.4	238525	431127	1.30904e+06	2.08794e+06	3.09581e+06	766220	1.27125e+06	160396	1.47124e+06	144293	593968	99253.8	304402
P50395|GDIB_HUMAN;Q5SX87|Q5SX87_HUMAN;Q5SX91|Q5SX91_HUMAN;Q5SX86|Q5SX86_HUMAN;Q5SX90|Q5SX90_HUMAN;V9GYJ7|V9GYJ7_HUMAN;G5E9U5|G5E9U5_HUMAN	13	9	561.8	6.58451e-05	0.000111536	7.36983	0.999501	Competition	Control	P50395	119151	192711	69785.1	126285	93310.6	209069	939374	274124	1.11881e+06	350119	1.58434e+06	1.7051e+06	515904	402730	461462	298452	398113	492944	96495.3	245318	53238.5	166499	87610.5	362544	1.16185e+06	561053	1.83255e+06	1.10329e+06	2.47592e+06	4.42783e+06	460100	773689	461462	504128	416286	934520
P22087|FBRL_HUMAN;M0QXL5|M0QXL5_HUMAN;M0R1H0|M0R1H0_HUMAN;A6NHQ2|FBLL1_HUMAN	4	4	237.34	6.78677e-05	0.000114158	4.61401	0.999473	Control	Competition	P22087	430541	351358	362764	268665	259904	142011	80173.4	22729	70009.2	76174.1	93831.3	50502.7	235748	128375	219909	114874	87706.6	138703	348677	447274	276750	354218	244027	246259	99161.6	46519.7	114671	240038	146634	131146	210248	246623	219909	194038	91710.4	262953
A0A2R8Y6Y7|A0A2R8Y6Y7_HUMAN;A0A0U1RQL1|A0A0U1RQL1_HUMAN;Q5T9Q5|Q5T9Q5_HUMAN	2	2	108.57	7.10641e-05	0.000118704	8.06572	0.999428	Competition	Control	A0A2R8Y6Y7	3468.53	13912.6	10299.1	8628.74	16599.6	4192.62	58006.1	39233.6	61841.3	108401	100332	92749	11951.1	6069.19	12166.3	14187.9	6705	59103.2	2809.02	17710.5	7857.13	11376.4	15585.6	7270.36	71744.2	80300	101293	341590	156794	240852	10658.3	11659.6	12166.3	23965.4	7011.08	112047
Q96G23|CERS2_HUMAN;Q5SZE1|Q5SZE1_HUMAN;H0YKH6|H0YKH6_HUMAN;H0YLQ6|H0YLQ6_HUMAN;H0YNU7|H0YNU7_HUMAN	4	4	315.01	7.27007e-05	0.000120601	6.43767	0.999405	Competition	Control	Q96G23	134181	275748	103059	54948	199286	58433.8	646316	349172	938176	514492	960771	1.90638e+06	308456	206413	284091	142179	276668	190238	108668	351024	78623.2	72445.4	187112	101329	799388	714656	1.53668e+06	1.62126e+06	1.50144e+06	4.95052e+06	275091	396541	284091	240160	289298	360653
G3V3E6|G3V3E6_HUMAN	2	2	163.15	7.89181e-05	0.000130018	17.9986	0.999313	Competition	Control	G3V3E6	17474.8	18690.7	8582.14	5792.78	4456.57	12579.9	57912.7	59934.6	220181	248498	270564	359200	22628.4	8200.97	18087.1	12441.9	781.306	17510.9	14152.1	23793	6547.24	7637.41	4184.34	21814.6	71628.7	122669	360644	783063	422822	932776	20180.8	15755	18087.1	21016.2	816.973	33197
A0A087WYT3|A0A087WYT3_HUMAN;B4DDC6|B4DDC6_HUMAN	3	3	127.94	8.00443e-05	0.000130976	8.74328	0.999296	Competition	Control	A0A087WYT3	31478.2	38394	46829.4	41182.8	23398.1	10672	235982	135704	336605	285716	329065	355240	103267	37961.1	137366	9364.44	41850.7	40832.2	25492.9	48875	35725.8	54296.9	21968.8	18506.1	291872	277747	551340	900342	514244	922493	92096.5	72927.3	137366	15817.9	43761.2	77409.5
P32455|GBP1_HUMAN;H3BNS1|H3BNS1_HUMAN;P32456|GBP2_HUMAN	7	7	310.24	8.06939e-05	0.000131147	6.86671	0.999286	Competition	Control	P32455	36252.7	27743.9	18237.3	69070.1	33872.8	42285.1	250230	289801	348011	120354	382174	171344	179300	91795	110680	427958	73746.9	57511.8	29359.6	35317.6	13913.1	91064.5	31803.6	73325.9	309495	593141	570022	379258	597239	444949	159905	176348	110680	722880	77113.4	109030
P62873|GBB1_HUMAN;F6UT28|F6UT28_HUMAN;F6X3N5|F6X3N5_HUMAN;B1AKQ8|B1AKQ8_HUMAN;C9JIS1|C9JIS1_HUMAN;C9JZN1|C9JZN1_HUMAN;B3KVK2|B3KVK2_HUMAN;E9PCP0|E9PCP0_HUMAN;Q9HAV0|GBB4_HUMAN;C9JD14|C9JD14_HUMAN	7	7	311.03	8.37822e-05	0.000135252	2.54457	0.999239	Competition	Control	P62873	362024	340003	353177	254776	352857	190503	709772	762964	510924	1.07553e+06	1.00217e+06	654588	549618	404783	542636	273476	357835	352123	293188	432819	269436	335906	331302	330347	877873	1.56157e+06	836866	3.38919e+06	1.56614e+06	1.69985e+06	490167	777632	542636	461938	374170	667552
Q15067|ACOX1_HUMAN;I3L0T4|I3L0T4_HUMAN;I3L2U4|I3L2U4_HUMAN	9	9	369.09	8.4478e-05	0.000135466	7.38714	0.999228	Competition	Control	Q15067	56274.8	42063.4	46382.7	63824.3	27706.6	436574	430519	588461	778151	529838	1.01556e+06	1.62772e+06	198511	288431	177038	350780	85749.1	152079	45574.7	53546.2	35385	84148.3	26014.1	757055	532483	1.20441e+06	1.27457e+06	1.66961e+06	1.58706e+06	4.2269e+06	177038	554108	177038	592517	89663.6	288311
P19474|RO52_HUMAN;H0YDP8|H0YDP8_HUMAN	9	7	366.15	8.53084e-05	0.000135892	4.28194	0.999215	Competition	Control	P19474	162865	494348	125684	154813	242099	752421	1.0946e+06	1.38795e+06	1.56569e+06	1.27225e+06	1.63528e+06	1.31791e+06	226753	453930	249351	737800	263458	469956	131898	629298	95883.2	204111	227310	1.30476e+06	1.35385e+06	2.84074e+06	2.56452e+06	4.0091e+06	2.55553e+06	3.42237e+06	202225	872049	249351	1.24625e+06	275485	890938
P26641|EF1G_HUMAN	15	15	886.68	8.73208e-05	0.000138183	4.75867	0.999183	Competition	Control	P26641	621185	448306	568321	1.67345e+06	537869	1.96163e+06	3.20872e+06	1.87221e+06	5.40742e+06	6.16216e+06	5.85795e+06	5.14299e+06	2.48976e+06	1.96913e+06	2.0137e+06	1.45015e+06	1.53997e+06	2.38688e+06	503072	570687	433567	2.20634e+06	505013	3.40162e+06	3.96867e+06	3.83189e+06	8.85705e+06	1.94181e+07	9.15447e+06	1.33554e+07	2.22045e+06	3.78291e+06	2.0137e+06	2.4495e+06	1.61027e+06	4.52504e+06
P63261|ACTG_HUMAN;I3L1U9|I3L1U9_HUMAN;I3L4N8|I3L4N8_HUMAN;I3L3R2|I3L3R2_HUMAN;Q6S8J3|POTEE_HUMAN;A5A3E0|POTEF_HUMAN;B8ZZJ2|B8ZZJ2_HUMAN;A0A2R8YEA7|A0A2R8YEA7_HUMAN;P0CG38|POTEI_HUMAN;P0CG39|POTEJ_HUMAN;Q562R1|ACTBL_HUMAN;A0A2R8YFE2|A0A2R8YFE2_HUMAN;Q9BYX7|ACTBM_HUMAN;F8WCH0|F8WCH0_HUMAN	23	2	2359.83	8.86823e-05	0.000138515	2.91673	0.999161	Competition	Control	P63261	2.74787e+07	1.93468e+07	2.93102e+07	2.67659e+07	3.2482e+07	2.54086e+07	7.93449e+07	7.90475e+07	7.30189e+07	7.54961e+07	8.25711e+07	7.95095e+07	8.14852e+07	1.00148e+08	5.54827e+07	3.80582e+07	2.91349e+07	3.27742e+07	2.22539e+07	2.46282e+07	2.23605e+07	3.52891e+07	3.04978e+07	4.40606e+07	9.81369e+07	1.61788e+08	1.19601e+08	2.37902e+08	1.29037e+08	2.06472e+08	7.26711e+07	1.92395e+08	5.54827e+07	6.42855e+07	3.04649e+07	6.21331e+07
P60709|ACTB_HUMAN;A0A2R8Y793|A0A2R8Y793_HUMAN;A0A2R8YGF8|A0A2R8YGF8_HUMAN;C9JUM1|C9JUM1_HUMAN;C9JTX5|C9JTX5_HUMAN	23	2	2353.11	8.86823e-05	0.000138515	2.91673	0.999161	Competition	Control	P60709	1.14158e+07	8.03746e+06	1.21766e+07	1.11196e+07	1.34943e+07	1.05558e+07	3.29631e+07	3.28396e+07	3.0335e+07	3.13642e+07	3.43034e+07	3.30315e+07	3.38523e+07	4.16055e+07	2.30498e+07	1.58109e+07	1.21038e+07	1.36157e+07	9.24517e+06	1.02316e+07	9.28947e+06	1.46605e+07	1.267e+07	1.83045e+07	4.07701e+07	6.72133e+07	4.96871e+07	9.88342e+07	5.36074e+07	8.57768e+07	3.01905e+07	7.99287e+07	2.30498e+07	2.67068e+07	1.26564e+07	2.58126e+07
C9JZR2|C9JZR2_HUMAN;E9PKY0|E9PKY0_HUMAN;H0YC95|H0YC95_HUMAN	4	4	122.73	9.00465e-05	0.000139738	2.63634	0.999139	Probe	Competition	C9JZR2	4.02523e+08	4.21454e+08	2.70876e+08	2.70841e+08	2.89707e+08	3.42903e+08	1.38908e+08	1.74158e+08	1.15389e+08	1.54289e+08	1.55045e+08	1.82971e+08	3.16527e+08	4.17196e+08	2.10855e+08	3.13877e+08	4.75485e+08	6.93493e+08	3.25987e+08	5.36504e+08	2.06649e+08	3.57086e+08	2.7201e+08	5.94622e+08	1.71807e+08	3.56451e+08	1.89001e+08	4.86192e+08	2.42296e+08	4.75142e+08	2.82289e+08	8.0148e+08	2.10855e+08	5.30182e+08	4.97191e+08	1.31472e+09
O00264|PGRC1_HUMAN	3	2	160.98	9.10132e-05	0.000140184	22.3975	0.999124	Competition	Control	O00264	25192.2	18476.8	18564.9	16943.3	8572.44	27492.7	283659	129111	562550	563257	600528	442038	229137	138272	113093	5626.29	96460.8	114274	20402.1	23520.8	14163	22338.7	8048.77	47674.5	350840	264254	921426	1.77493e+06	938471	1.14789e+06	204352	265635	113093	9503.59	100864	216640
V9GYS0|V9GYS0_HUMAN;V9GYU0|V9GYU0_HUMAN	2	2	190.32	9.14995e-05	0.000140184	5.56143	0.999116	Competition	Control	V9GYS0	50120.9	78913.8	31491.1	127614	44173.6	80876.6	153210	250039	419729	665527	329261	480163	107515	230426	124357	202452	70130.6	173518	40590.9	100456	24024.3	168251	41475.2	140247	189496	511760	687493	2.0972e+06	514550	1.2469e+06	95885.7	442674	124357	341969	73332	328955
A0A0U1RRM4|A0A0U1RRM4_HUMAN;K7EK45|K7EK45_HUMAN;K7EKJ7|K7EKJ7_HUMAN;A0A087WU68|A0A087WU68_HUMAN;K7ES59|K7ES59_HUMAN;K7ELW5|K7ELW5_HUMAN	5	5	455.31	9.69529e-05	0.000147599	8.18852	0.999026	Competition	Control	A0A0U1RRM4	141247	41192.1	88583.9	42606.2	129164	61329.3	390484	512252	1.00543e+06	1.3896e+06	616992	213259	257752	190325	197662	60393.7	253786	227657	114390	52436.9	67579.9	56173.6	121274	106350	482966	1.04843e+06	1.64684e+06	4.37889e+06	964201	553794	229872	365636	197662	102013	265371	431591
E9PRG8|CK098_HUMAN;A0A494BXY3|A0A494BXY3_HUMAN	4	4	157.15	9.77531e-05	0.000147881	2.83484	0.999012	Control	Competition	E9PRG8	2.1952e+06	1.64254e+06	2.41028e+06	2.68646e+06	2.36447e+06	2.42133e+06	1.23197e+06	302154	496798	1.10379e+06	820009	885149	2.00581e+06	2.9264e+06	2.40936e+06	2.09888e+06	1.32665e+06	1.74091e+06	1.7778e+06	2.09093e+06	1.83878e+06	3.54193e+06	2.22004e+06	4.19879e+06	1.52375e+06	618423	813728	3.47825e+06	1.28146e+06	2.29857e+06	1.78884e+06	5.62194e+06	2.40936e+06	3.5453e+06	1.38722e+06	3.3004e+06
B7ZAR1|B7ZAR1_HUMAN	8	7	320.05	9.87185e-05	0.000148408	4.16824	0.998996	Competition	Control	B7ZAR1	171262	136398	184382	185432	158401	178638	550090	571948	921619	571311	768354	845413	293739	431849	370363	422602	172424	76754.6	138698	173633	140664	244481	148725	309772	680373	1.17061e+06	1.50956e+06	1.8003e+06	1.20074e+06	2.19538e+06	261966	829628	370363	713834	180295	145511
A0A286YFD6|A0A286YFD6_HUMAN;C9JXC1|C9JXC1_HUMAN	2	2	64.04	9.97749e-05	0.000149065	44.4975	0.998978	Competition	Control	A0A286YFD6	47.4092	1220.08	2539.25	5807.09	929.636	6680.22	108582	133085	110907	131862	127232	154743	21606.2	9271.99	26683.8	49870.8	9684.49	986.342	38.3947	1553.15	1937.17	7656.28	872.847	11584.1	134298	272387	181660	415522	198832	401839	19269.1	17812.5	26683.8	84238.8	10126.6	1869.9
Q96KC8|DNJC1_HUMAN;Q5T1X2|Q5T1X2_HUMAN	3	3	82.14	0.000100883	0.000149789	18.6095	0.998959	Competition	Control	Q96KC8	1029.17	2495.59	1855.37	2248.37	474.807	3789.75	36669.1	10140.3	59771.3	4002.42	27420.6	83320.1	3308.06	1500.73	2656.78	2156.35	1853.96	5570.22	833.479	3176.85	1415.45	2964.34	445.803	6571.74	45353.8	20754.2	97902.1	12612.3	42851.4	216367	2950.24	2883.07	2656.78	3642.38	1938.6	10560
F5H3C1|F5H3C1_HUMAN	1	1	54.3	0.000108461	0.000160053	19.1117	0.998827	Competition	Control	F5H3C1	3124.86	4021.43	1550.05	1634.72	2449	8427.08	13283	16184	68311.8	161838	49360.8	96326.5	3632.96	11628.5	4733.85	26763.8	4169.07	3357.69	2530.69	5119.22	1182.52	2155.27	2299.4	14613.2	16429	33124	111891	509980	77138.3	250143	3239.99	22339.6	4733.85	45207.7	4359.39	6365.49
Q9UJS0|CMC2_HUMAN;O75746|CMC1_HUMAN	3	3	100.01	0.000111062	0.000162892	10.3022	0.998781	Competition	Control	Q9UJS0	7160.77	2769.33	6153.45	4923.47	12245.6	19824.2	41419.7	31254.1	133848	217231	86300.5	36755.6	8315.84	19180.3	20366.8	29933.9	18323.7	29572.3	5799.21	3525.31	4694.42	6491.28	11497.5	34376.8	51229.4	63968.2	219235	684535	134865	95447.6	7416.33	36847.4	20366.8	50562.6	19160.2	56063
A0A0C4DGS1|A0A0C4DGS1_HUMAN;U3KQ84|U3KQ84_HUMAN	5	5	272.81	0.000118216	0.000172335	5.96408	0.998651	Competition	Control	A0A0C4DGS1	161745	57264.8	204134	110564	123487	133585	726398	729291	660389	439259	1.33808e+06	822856	544165	487287	262093	75380.4	189143	315706	130991	72897.3	155733	145771	115943	231647	898438	1.49265e+06	1.08168e+06	1.38418e+06	2.09108e+06	2.13681e+06	485304	936132	262093	127328	197777	598514
K7ERI8|K7ERI8_HUMAN;F8VVK3|F8VVK3_HUMAN;K7ENY4|K7ENY4_HUMAN;F8VUA5|F8VUA5_HUMAN;F8VPW9|F8VPW9_HUMAN	4	2	228.04	0.00011965	0.000173374	10.2095	0.998624	Competition	Control	K7ERI8	15549.2	37683.2	8766.77	41784.1	26799.1	50464.6	109106	145741	544079	297618	560535	191319	108330	36491.3	115791	47163.6	21254.5	92868.2	12592.7	47970.2	6688.1	55089.8	25162	87509.8	134947	298291	891172	937847	875972	496820	96612	70103.8	115791	79665.9	22224.7	176059
O15118|NPC1_HUMAN;K7EQ23|K7EQ23_HUMAN	3	3	121.99	0.000124114	0.000178438	15.4918	0.998541	Probe	Control	O15118	6325.61	4006.58	9967.02	13245	12896.6	14840.1	25858.8	80863.5	150781	40922.6	246875	70073.9	230379	17402.9	286181	145185	119176	151028	5122.85	5100.32	7603.76	17462.7	12108.8	25733.9	31983.1	165505	246971	128954	385802	181969	205459	33432.8	286181	245237	124616	286317
A0A087X0L7|A0A087X0L7_HUMAN;C9JC63|C9JC63_HUMAN	2	2	70.08	0.000124628	0.000178438	5.02878	0.998531	Competition	Control	A0A087X0L7	35720.6	24254.3	39236.3	19850.8	26777.8	24133.2	103123	90873.6	161970	125731	209076	163984	99062.2	137658	59616.5	38382.3	32505.7	20739.2	28928.7	30875.4	29933	26172.1	25142	41848.9	127546	185992	265298	396200	326732	425836	88346.9	264456	59616.5	64833.1	33989.6	39317.2
P49755|TMEDA_HUMAN;G3V2K7|G3V2K7_HUMAN	4	3	267.1	0.000127195	0.000181035	6.47902	0.998483	Competition	Control	P49755	131993	110145	98643.4	81718.8	132337	27153.6	439361	314936	815654	950913	899148	350722	290409	232815	233360	58272.8	146854	114941	106896	140213	75254.3	107741	124253	47086.6	543418	644584	1.336e+06	2.9965e+06	1.40514e+06	910761	258996	447262	233360	98430.8	153558	217904
A0A087X1Z3|A0A087X1Z3_HUMAN;H0YM70|H0YM70_HUMAN;H0YKU2|H0YKU2_HUMAN;H0YLD2|H0YLD2_HUMAN	8	8	384.63	0.000132015	0.00018679	1.96265	0.998391	Competition	Control	A0A087X1Z3	389686	447386	468282	546394	360721	404623	498187	670344	1.10543e+06	827347	1.08459e+06	950530	865393	1.0666e+06	709268	1.02591e+06	702119	763793	315591	569516	357249	720386	338685	701650	616177	1.372e+06	1.81064e+06	2.60712e+06	1.69494e+06	2.46835e+06	771785	2.04905e+06	709268	1.7329e+06	734170	1.44799e+06
F8VV69|F8VV69_HUMAN;Q6N075|MFSD5_HUMAN	2	2	82.1	0.0001333	0.000187505	6.60225	0.998366	Competition	Control	F8VV69	16943.6	38647.2	11472.8	19698.1	18541	13885.4	36942.1	55088.2	116047	335722	110328	132781	47322.5	66091.8	48451.1	53707.2	39703.5	52241.2	13721.9	49197.4	8752.49	25970.6	17408.4	24078.4	45691.4	112750	190079	1.05792e+06	172414	344809	42203.8	126969	48451.1	90719	41516	99038.6
E5RJH0|E5RJH0_HUMAN	1	1	48.82	0.000134425	0.000187988	3.01023	0.998344	Control	Competition	E5RJH0	861826	1.20515e+06	779902	1.0885e+06	648588	894976	419096	120972	265263	336837	315863	362074	348134	686894	631400	793615	834710	988523	697958	1.53414e+06	594981	1.43512e+06	608967	1.55196e+06	518354	247595	434486	1.06143e+06	493613	940240	310477	1.3196e+06	631400	1.34053e+06	872814	1.87403e+06
P04899|GNAI2_HUMAN;P08754|GNAI3_HUMAN;P63096|GNAI1_HUMAN;P09471|GNAO_HUMAN;A0A087WTB6|A0A087WTB6_HUMAN;A0A1W2PP38|A0A1W2PP38_HUMAN	12	11	804.32	0.000135959	0.000189034	12.7275	0.998314	Competition	Control	P04899	69559.2	84647.7	36210	52429.3	58446.3	143789	326063	120739	1.283e+06	1.22855e+06	1.41122e+06	1.29518e+06	459664	483123	438600	501612	166205	200000	56333.1	107755	27624.3	69124.7	54876	249342	403287	247118	2.10148e+06	3.87137e+06	2.20538e+06	3.36336e+06	409944	928132	438600	847292	173793	379158
A0A024R4E5|A0A024R4E5_HUMAN;Q00341|VIGLN_HUMAN;C9J5E5|C9J5E5_HUMAN;H0Y394|H0Y394_HUMAN;C9JMQ6|C9JMQ6_HUMAN;H7C0A4|H7C0A4_HUMAN	4	4	203.16	0.000137218	0.000189688	8.24409	0.99829	Competition	Control	A0A024R4E5	22440.8	14985.9	37686.6	22322.6	10941.4	13013.4	121006	41897.6	241202	379907	151516	65228	40015	24824.2	32904.3	50439.8	71712	32037.4	18173.9	19076.8	28750.8	29430.9	10273.1	22566.3	149665	85752.6	395075	1.19716e+06	236780	169385	35686.7	47690.1	32904.3	85199.9	74985.7	60736.2
Q04917|1433F_HUMAN;A2IDB2|A2IDB2_HUMAN	5	1	261.4	0.000139205	0.000191336	13.0694	0.998251	Competition	Control	Q04917	3402.04	3518.29	2521.59	2268.32	2723.98	2666.69	16496.1	16014.5	82156.1	5047.3	81759	22025.3	10657.8	11716.1	12049.2	8485.97	10510.5	6677.69	2755.17	4478.74	1923.7	2990.64	2557.58	4624.26	20403	32777	134567	15905	127768	57195.7	9504.97	22507.8	12049.2	14334	10990.4	12659.5
Q9UBM7|DHCR7_HUMAN;E9PJ54|E9PJ54_HUMAN;E9PIP9|E9PIP9_HUMAN;H0YE57|H0YE57_HUMAN	3	3	128.24	0.000141399	0.000193247	4.47802	0.998207	Competition	Control	Q9UBM7	37251.5	46251	26837	54090.8	26735.2	80078.3	178421	222936	171047	133057	227567	281607	172532	103554	116072	27846.5	77512.3	104894	30168.5	58876.8	20473.8	71315.4	25102	138862	220678	456287	280165	419286	355629	731283	153870	198938	116072	47036.5	81050.7	198858
H3BN98|H3BN98_HUMAN;H3BPJ2|H3BPJ2_HUMAN	3	1	120.53	0.000143847	0.000195483	7.04339	0.998159	Competition	Control	H3BN98	7699.07	10253.8	18617.1	33447.4	14633.4	6911.87	45211.6	45774.1	88556.6	154929	159598	150842	36416	137354	38969.4	30870.2	30053.7	34388.4	6235.16	13052.9	14202.8	44098.3	13739.4	11985.8	55919.4	93686.6	145051	488211	249410	391708	32476.9	263871	38969.4	52144	31425.7	65193.2
Q86VP6|CAND1_HUMAN;A0A0C4DGH5|A0A0C4DGH5_HUMAN;H0YH27|H0YH27_HUMAN	9	9	333.03	0.000145624	0.000196785	3.25312	0.998123	Competition	Control	Q86VP6	41724.4	82825.5	49541.9	65146.6	42235.4	147131	163986	124981	339291	195448	327095	243502	132793	170483	142653	157846	118091	124577	33790.9	105436	37795.1	85891.7	39655.3	255137	202825	255800	555739	615891	511166	632332	118429	327516	142653	266625	123482	236172
Q9H3N1|TMX1_HUMAN;G3V448|G3V448_HUMAN	3	3	138.77	0.000147299	0.000197937	3.19059	0.99809	Competition	Control	Q9H3N1	157968	192685	141091	143954	146653	191377	415322	224906	712211	432252	781554	540523	261396	249626	284528	228114	191316	109126	127932	245285	107637	189794	137694	331863	513686	460319	1.16656e+06	1.3621e+06	1.22137e+06	1.40364e+06	233121	479558	284528	385317	200050	206880
Q96D15|RCN3_HUMAN;M0QZH0|M0QZH0_HUMAN;M0QYB8|M0QYB8_HUMAN	5	5	404.79	0.000148762	0.000198791	97.3818	0.99806	Competition	Control	Q96D15	2166.41	507.557	21004.9	7726.54	21592.6	22853	595700	349176	671834	45082.8	2.56834e+06	3.15636e+06	91525.6	39056	35583.8	43570	6012.98	38895.8	1754.49	646.112	16024.4	10187	20273.5	39628.9	736785	714665	1.10043e+06	142064	4.01366e+06	8.1965e+06	81625.5	75030.9	35583.8	73595.8	6287.48	73738.3
P07711|CATL1_HUMAN	1	1	43.36	0.00015383	0.00020398	6.36762	0.997957	Probe	Control	P07711	23339.7	11855.6	36583.8	49287.6	15625.3	16063.1	68612.3	31065.4	16359.3	62935.3	62453.6	20905.9	95156.9	64238.9	245433	263382	130463	174014	18901.9	15092	27909.5	64982.5	14670.8	27854.8	84862.3	63582	26795.6	198321	97599	54288.9	84864	123410	245433	444888	136419	329894
H0Y8D1|H0Y8D1_HUMAN;A6XGL3|A6XGL3_HUMAN;A0A0J9YYC8|A0A0J9YYC8_HUMAN	6	6	274.91	0.000154341	0.00020398	2.7212	0.997947	Probe	Competition	H0Y8D1	7.31541e+07	1.00303e+08	6.51925e+07	8.49641e+07	6.60934e+07	1.07977e+08	3.52365e+07	4.58613e+07	3.48894e+07	1.27668e+07	4.49797e+07	3.62906e+07	7.31389e+07	9.94045e+07	6.65569e+07	9.46321e+07	8.89347e+07	1.48852e+08	5.92445e+07	1.27684e+08	4.97349e+07	1.1202e+08	6.2056e+07	1.8724e+08	4.35819e+07	9.38652e+07	5.71469e+07	4.02306e+07	7.02917e+07	9.424e+07	6.52276e+07	1.90967e+08	6.65569e+07	1.59847e+08	9.29946e+07	2.82192e+08
O96008|TOM40_HUMAN;K7EKG4|K7EKG4_HUMAN;K7EJ57|K7EJ57_HUMAN	3	3	137.05	0.000156166	0.000205265	43.4914	0.997909	Competition	Control	O96008	1099.24	22157.2	2899.26	8835.56	1468.52	4877.6	104226	19107.8	521570	163899	490943	498075	138171	8196.15	49515.1	55080.9	21701	17773.4	890.229	28205.8	2211.82	11649.1	1378.82	8458.16	128911	39108.2	854303	516475	767218	1.29341e+06	123225	15745.7	49515.1	93039.4	22691.7	33694.7
P20618|PSB1_HUMAN	4	4	170.44	0.000158472	0.000205939	12.7743	0.997862	Competition	Control	P20618	19136.9	26188.4	34574.9	52677.5	12925.5	53575	251138	194041	492922	676940	510921	417118	156552	121797	33862.4	423948	26981.7	307781	15498.2	33337.5	26376.9	69452	12135.9	92903.4	310617	397147	807380	2.13316e+06	798439	1.08318e+06	139618	233986	33862.4	716108	28213.4	583490
O43169|CYB5B_HUMAN;A0A499FJ32|A0A499FJ32_HUMAN;D6RFH4|D6RFH4_HUMAN;J3QR91|J3QR91_HUMAN	5	5	385.21	0.000158934	0.000205939	10.0834	0.997852	Competition	Control	O43169	215991	205266	159579	117098	223989	213804	1.11965e+06	538383	3.26384e+06	3.22475e+06	2.69953e+06	605868	639733	100545	584302	268328	474530	228749	174922	261301	121741	154387	210306	370753	1.38483e+06	1.10192e+06	5.346e+06	1.01618e+07	4.21868e+06	1.57333e+06	570535	193159	584302	453244	496192	433661
A0A0A0MRA8|A0A0A0MRA8_HUMAN;A8K968|A8K968_HUMAN;J3QS55|J3QS55_HUMAN;A0A0J9YY18|A0A0J9YY18_HUMAN;A0A1B0GTF8|A0A1B0GTF8_HUMAN;J3KRD1|J3KRD1_HUMAN	3	3	135.23	0.000159247	0.000205939	3.25871	0.997846	Competition	Control	A0A0A0MRA8	71622.2	102454	62300.5	21988.1	92668.7	107568	183776	184896	232465	320246	327063	246006	112167	159087	125485	162079	120819	142540	58003.9	130422	47528.6	28989.9	87007.8	186532	227301	378430	380765	1.00915e+06	511116	638832	100034	305623	125485	273775	126335	270226
Q13085|ACACA_HUMAN;Q59FY4|Q59FY4_HUMAN;O00763|ACACB_HUMAN;A0A087WYK6|A0A087WYK6_HUMAN;A0A087WYS8|A0A087WYS8_HUMAN;F8W8T8|F8W8T8_HUMAN	26	26	1291.1	0.000160363	0.000206272	2.43121	0.997823	Control	Competition	Q13085	2.42693e+06	2.31037e+06	2.97435e+06	3.05956e+06	3.24251e+06	2.55663e+06	1.34597e+06	859155	827788	995225	1.13106e+06	1.6565e+06	1.66545e+06	1.62586e+06	3.04495e+06	4.85275e+06	1.98813e+06	2.62786e+06	1.96547e+06	2.94107e+06	2.26911e+06	4.03384e+06	3.04443e+06	4.43341e+06	1.66474e+06	1.75845e+06	1.35587e+06	3.13613e+06	1.76755e+06	4.30162e+06	1.4853e+06	3.12345e+06	3.04495e+06	8.19698e+06	2.07889e+06	4.98188e+06
P50454|SERPH_HUMAN;E9PPV6|E9PPV6_HUMAN;E9PR70|E9PR70_HUMAN;E9PK86|E9PK86_HUMAN;E9PKH2|E9PKH2_HUMAN;E9PNX1|E9PNX1_HUMAN;E9PIG2|E9PIG2_HUMAN;E9PQ34|E9PQ34_HUMAN;E9PLA6|E9PLA6_HUMAN;H0YEP8|H0YEP8_HUMAN	15	15	940.29	0.000161718	0.000206523	5.5102	0.997795	Competition	Control	P50454	783259	409676	1.03506e+06	718731	799178	423093	2.91176e+06	3.54881e+06	4.69103e+06	5.50334e+06	5.14085e+06	1.17618e+06	2.00231e+06	2.51398e+06	1.90759e+06	635012	1.4656e+06	933992	634329	521512	789636	947602	750359	733678	3.60138e+06	7.26341e+06	7.68365e+06	1.7342e+07	8.03384e+06	3.05432e+06	1.78572e+06	4.82962e+06	1.90759e+06	1.07262e+06	1.5325e+06	1.77066e+06
P68371|TBB4B_HUMAN;Q3ZCM7|TBB8_HUMAN;M0R2D3|M0R2D3_HUMAN;M0QY85|M0QY85_HUMAN;M0QYM7|M0QYM7_HUMAN;M0QX14|M0QX14_HUMAN	24	1	1832.96	0.000162569	0.000206523	4.5052	0.997777	Competition	Control	P68371	1.09788e+06	1.46097e+06	1.20215e+06	1.29207e+06	1.26089e+06	1.20219e+06	4.96073e+06	1.93847e+06	5.70982e+06	5.5892e+06	8.1774e+06	7.48616e+06	2.78731e+06	6.68041e+06	3.6441e+06	1.44136e+06	1.96499e+06	2.67339e+06	889130	1.85979e+06	917110	1.70351e+06	1.18387e+06	2.0847e+06	6.13563e+06	3.96749e+06	9.35237e+06	1.76126e+07	1.27792e+07	1.94402e+07	2.48581e+06	1.28338e+07	3.6441e+06	2.43466e+06	2.0547e+06	5.06819e+06
Q32P28|P3H1_HUMAN;H7C2W6|H7C2W6_HUMAN;Q8IVL5|P3H2_HUMAN	4	4	156.67	0.000163133	0.000206523	2.74965	0.997765	Competition	Control	Q32P28	82653.9	58133	63245.8	49417.5	40126.5	65460.9	118134	92641	195814	189145	279967	111525	82702.8	56043.7	64892.3	82750.7	62637.3	40473.5	66938	74002.5	48249.7	65153.9	37675.3	113515	146113	189610	320732	596029	437517	289611	73757	107666	64892.3	139777	65496.7	76729.4
P31930|QCR1_HUMAN	3	3	220.21	0.000164902	0.000207669	11.5259	0.997728	Competition	Control	P31930	22384	12460.5	38616.2	37906	38403.3	15367.3	143906	289758	66894.1	429485	359360	613953	81262.7	17211.5	62627.4	23292.7	61516.1	141325	18127.9	15862	29460	49976.7	36057.4	26648.2	177989	593052	109569	1.35338e+06	561587	1.59432e+06	72472.7	33065.2	62627.4	39344.6	64324.3	267922
D6REX3|D6REX3_HUMAN;H0Y9T9|H0Y9T9_HUMAN;H7BXG7|H7BXG7_HUMAN	3	3	141.58	0.000165928	0.000207873	7.72587	0.997707	Competition	Control	D6REX3	30357.2	12018.6	50938.3	25557	23690.7	13398.3	134820	69072.5	172112	78867.1	211571	538485	111999	40981.3	37247.4	45926.7	39596.2	50268.6	24585	15299.5	38860.4	33695.2	22243.5	23233.8	166750	141372	281910	248524	330630	1.39835e+06	99884.1	78729.5	37247.4	77576.5	41403.7	95298.9
Q8NBS9|TXND5_HUMAN	11	10	577.92	0.000168741	0.000209294	11.9794	0.997648	Competition	Control	Q8NBS9	56921.5	33224.8	62982.7	89849.1	71505.1	218242	877556	1.03491e+06	841316	130844	1.29021e+06	2.20687e+06	217770	406435	166137	98935.7	84683	130442	46098.4	42294.7	48049	118460	67137.1	378450	1.0854e+06	2.11817e+06	1.37803e+06	412315	2.01626e+06	5.73085e+06	194214	780807	166137	167116	88548.8	247291
O95831|AIFM1_HUMAN;E9PMA0|E9PMA0_HUMAN	5	5	202.93	0.000168803	0.000209294	5.761	0.997646	Competition	Control	O95831	33559.6	83778.3	46403.8	89787.3	26373.4	215365	244673	403138	509763	647146	519594	528924	69433.4	266467	47917.8	46083.7	29706.6	119100	27178.5	106649	35401.1	118379	24762.3	373461	302621	825109	834964	2.03928e+06	811992	1.37352e+06	61923	511912	47917.8	77841.8	31062.7	225789
O00299|CLIC1_HUMAN	10	10	533.47	0.000181984	0.000224189	5.42929	0.997365	Competition	Control	O00299	355831	570586	367699	545495	417979	521016	2.0598e+06	2.94747e+06	2.83333e+06	2.69932e+06	3.66717e+06	878774	1.38083e+06	2.36342e+06	1.48002e+06	356385	1.55286e+06	2.05808e+06	288173	726348	280515	719200	392446	903485	2.54764e+06	6.03263e+06	4.64084e+06	8.50604e+06	5.73084e+06	2.28202e+06	1.23147e+06	4.54039e+06	1.48002e+06	601984	1.62375e+06	3.9017e+06
A0A087X271|A0A087X271_HUMAN;K7ES69|K7ES69_HUMAN;A0A087X1X5|A0A087X1X5_HUMAN;H3BQH0|H3BQH0_HUMAN	5	4	206.3	0.00018268	0.000224189	8.06067	0.99735	Competition	Control	A0A087X271	10851.8	9659.51	9291.42	7971.95	13231.6	8701.35	111599	11907	80789.4	127767	74760	74461.3	70784.5	22291.8	43686.8	17209.7	47166.8	44166.9	8788.46	12296.4	7088.35	10510.5	12423.3	15088.9	138031	24370.2	132329	402617	116831	193363	63127.9	42824.9	43686.8	29069.6	49320	83731.4
P61978|HNRPK_HUMAN;Q5T6W2|Q5T6W2_HUMAN;S4R359|S4R359_HUMAN;S4R457|S4R457_HUMAN	17	16	923.37	0.000185198	0.000226125	5.32486	0.997295	Competition	Control	P61978	193411	538611	124167	1.39857e+06	379552	1.48861e+06	2.56977e+06	3.89793e+06	5.10466e+06	1.94158e+06	4.26353e+06	4.17648e+06	902553	1.10994e+06	833282	727729	622028	835914	156635	685644	94726	1.84393e+06	356366	2.58137e+06	3.17839e+06	7.97795e+06	8.36116e+06	6.11828e+06	6.66281e+06	1.08456e+07	804926	2.13231e+06	833282	1.22924e+06	650424	1.58472e+06
Q92820|GGH_HUMAN	1	1	40.18	0.000204626	0.000248585	7.29605	0.996866	Competition	Control	Q92820	63596	11238	46068.9	8319.01	72002.2	42411.8	228194	135575	300654	620233	210198	282725	267130	83910.6	266299	70913.9	190232	148911	51503.8	14305.8	35145.6	10968.1	67603.8	73545.6	282239	277485	492454	1.95447e+06	328485	734186	238235	161201	266299	119783	198917	282305
P62258|1433E_HUMAN;K7EM20|K7EM20_HUMAN;B4DJF2|B4DJF2_HUMAN;K7EIT4|K7EIT4_HUMAN;I3L0W5|I3L0W5_HUMAN	13	11	736.1	0.000205721	0.000248659	6.01147	0.996842	Competition	Control	P62258	741791	320620	561445	362938	626527	243099	2.96245e+06	1.57934e+06	2.97718e+06	1.68961e+06	4.68686e+06	3.27586e+06	2.07976e+06	311617	2.02279e+06	658215	1.66402e+06	1.2115e+06	600746	408145	428322	478510	588255	421554	3.66407e+06	3.23246e+06	4.87646e+06	5.32428e+06	7.32436e+06	8.5068e+06	1.8548e+06	598649	2.02279e+06	1.11182e+06	1.73998e+06	2.29675e+06
P12814|ACTN1_HUMAN;H9KV75|H9KV75_HUMAN;A0A494C1A0|A0A494C1A0_HUMAN;G3V2N5|G3V2N5_HUMAN;H7C5W8|H7C5W8_HUMAN;G3V2W4|G3V2W4_HUMAN;Q08043|ACTN3_HUMAN;H0YJW3|H0YJW3_HUMAN;A0A087WSZ2|A0A087WSZ2_HUMAN;A0A494C033|A0A494C033_HUMAN;G3V2X9|G3V2X9_HUMAN;A0A494C060|A0A494C060_HUMAN;A0A494C0Q3|A0A494C0Q3_HUMAN;G3V5M4|G3V5M4_HUMAN;H0YJ11|H0YJ11_HUMAN;G3V2E8|G3V2E8_HUMAN;G3V380|G3V380_HUMAN;A0A494C031|A0A494C031…	30	15	1757.67	0.000212085	0.000255069	3.0052	0.996698	Competition	Control	P12814	991589	813244	968434	1.51166e+06	890311	1.45952e+06	2.30816e+06	7.43112e+06	1.99207e+06	2.22913e+06	3.03134e+06	2.94696e+06	1.37906e+06	1.16671e+06	1.29615e+06	1.80321e+06	981315	1.13206e+06	803047	1.03525e+06	738811	1.99303e+06	835925	2.53093e+06	2.85482e+06	1.52094e+07	3.2629e+06	7.02439e+06	4.73721e+06	7.65272e+06	1.22989e+06	2.24137e+06	1.29615e+06	3.04588e+06	1.02611e+06	2.14616e+06
P55735|SEC13_HUMAN;A8MXL6|A8MXL6_HUMAN	2	2	94.69	0.000223663	0.000267656	15.4898	0.996435	Competition	Control	P55735	13282.9	21736.6	6811.46	5678.08	19788.3	25429.4	104698	28205.6	283412	524361	222196	273446	23525.5	89338.8	58470.6	98538.4	38093.4	20059.4	10757.3	27670.4	5196.41	7486.19	18579.5	44096.7	129494	57728.8	464213	1.65236e+06	347236	710089	20980.8	171630	58470.6	166445	39832.4	38028.5
O95292|VAPB_HUMAN;E5RK64|E5RK64_HUMAN	3	2	115.8	0.000224817	0.000267705	7.6862	0.996408	Competition	Control	O95292	22946.9	7641.78	18248.4	7700.67	14628.5	17427	76270.5	60161	139286	89901.6	202054	113273	73872.1	34995.4	50390.1	98953.5	13113.8	11194.8	18583.8	9727.87	13921.6	10152.8	13734.9	30219.9	94334.3	123133	228142	283296	315759	294148	65881.5	67230	50390.1	167146	13712.4	21223
Q9P035|HACD3_HUMAN;H3BMZ1|H3BMZ1_HUMAN;H3BPZ1|H3BPZ1_HUMAN	2	2	145.06	0.00022685	0.000268795	11.77	0.996362	Competition	Control	Q9P035	140292	32641.4	109804	168919	118674	79906.5	1.03412e+06	497108	1.62782e+06	487795	1.75772e+06	2.24877e+06	828178	572954	643253	57720.4	311232	406915	113617	41552	83768.8	222709	111425	138565	1.27904e+06	1.01744e+06	2.66628e+06	1.53713e+06	2.74687e+06	5.83964e+06	738596	1.10071e+06	643253	97497.8	325440	771427
Q8TCB0|IFI44_HUMAN;C9JUM8|C9JUM8_HUMAN	4	4	193.82	0.000228008	0.000268844	2.8719	0.996335	Competition	Control	Q8TCB0	106469	78348.9	89871.5	228274	106628	281492	268339	316921	298644	556577	480648	637977	130620	144223	152625	185456	135891	182326	86225.2	99737.1	68562.2	300965	100114	488131	331892	648648	489162	1.75388e+06	751129	1.65671e+06	116491	277068	152625	313262	142094	345653
P55010|IF5_HUMAN;H0YK11|H0YK11_HUMAN	4	4	132.02	0.000239569	0.000281097	11.4322	0.996067	Competition	Control	P55010	7879.41	5770.58	5976.1	5926.88	4245.29	14405.9	70504.9	63412.3	127969	10908.3	134545	98010.9	48210.2	14671.5	22935.2	25937.3	6030.62	21466.1	6381.21	7345.86	4559.12	7814.22	3985.96	24981.1	87203.2	129787	209606	34374.1	210259	254516	42995.4	28185.5	22935.2	43811.8	6305.91	40695.2
P61106|RAB14_HUMAN	2	1	82.33	0.000241464	0.000281945	13.1901	0.996023	Competition	Control	P61106	16312.5	36672.9	22427.1	28998	21361.8	82172.5	142329	136701	239166	327454	254346	1.64283e+06	83990.9	172484	51810.6	74207	23340.1	77084.3	13210.8	46684.1	17109.5	38232	20056.9	142494	176038	279787	391741	1.03187e+06	397477	4.26612e+06	74905.8	331361	51810.6	125346	24405.6	146136
P42704|LPPRC_HUMAN;A0A0C4DG06|A0A0C4DG06_HUMAN;C9JCA9|C9JCA9_HUMAN;H7C3W8|H7C3W8_HUMAN	27	27	1121.27	0.000249018	0.000289361	3.72093	0.995846	Competition	Control	P42704	96127.2	216607	110763	99504.1	129227	78950.9	342450	196285	356023	386070	686853	752988	279690	135354	218478	98936.6	184588	149670	77849.4	275738	84500.6	131190	121333	136907	423556	401739	583146	1.21658e+06	1.07338e+06	1.95537e+06	249436	260030	218478	167118	193014	283744
A0A3B3IUB5|A0A3B3IUB5_HUMAN;A0A075B6F6|A0A075B6F6_HUMAN;A0A0C4DGU3|A0A0C4DGU3_HUMAN	4	3	172.55	0.000252037	0.000291196	29.7042	0.995774	Competition	Control	A0A3B3IUB5	96687.1	83337.3	107852	92604.6	57005.1	90724.1	1.88407e+06	84206.5	2.77785e+06	3.81431e+06	3.45202e+06	3.6776e+06	748586	1.13674e+06	595858	573923	242390	246686	78302.9	106087	82279.3	122093	53522.8	157323	2.33029e+06	172347	4.54996e+06	1.20196e+07	5.39462e+06	9.55007e+06	667613	2.18379e+06	595858	969436	253455	467665
O15460|P4HA2_HUMAN	3	3	164.57	0.000253454	0.000291196	2.75985	0.995741	Competition	Probe	O15460	131477	202145	93427.9	140795	159824	192997	268912	436009	236688	266873	652304	446586	87334.6	103037	123005	127755	169707	225212	106478	257327	71275.4	185629	150061	334673	332601	892387	387683	840967	1.01938e+06	1.1597e+06	77887.8	197945	123005	215797	177454	426955
P63244|RACK1_HUMAN;D6RAC2|D6RAC2_HUMAN;J3KPE3|J3KPE3_HUMAN;H0Y8W2|H0Y8W2_HUMAN;D6R9L0|D6R9L0_HUMAN;D6RHH4|D6RHH4_HUMAN;H0YAF8|H0YAF8_HUMAN;D6RBD0|D6RBD0_HUMAN;D6RFX4|D6RFX4_HUMAN;H0Y8R5|H0Y8R5_HUMAN;D6RF23|D6RF23_HUMAN;D6RFZ9|D6RFZ9_HUMAN;H0Y9P0|H0Y9P0_HUMAN;D6R909|D6R909_HUMAN;D6RHJ5|D6RHJ5_HUMAN;D6RDI0|D6RDI0_HUMAN	10	10	844.5	0.000254333	0.000291196	3.69506	0.99572	Competition	Control	P63244	653543	353805	575818	655346	678603	1.05321e+06	1.92754e+06	1.23195e+06	2.8657e+06	3.02457e+06	3.29188e+06	2.32893e+06	1.98235e+06	528959	1.63011e+06	1.0686e+06	700044	742353	529278	450388	439287	864032	637150	1.82635e+06	2.38406e+06	2.52145e+06	4.69387e+06	9.53097e+06	5.14437e+06	6.0478e+06	1.76793e+06	1.01619e+06	1.63011e+06	1.80502e+06	732001	1.40735e+06
E9PS44|E9PS44_HUMAN;E9PQN9|E9PQN9_HUMAN	4	4	398.65	0.00025544	0.000291196	10.3602	0.995694	Probe	Control	E9PS44	1.83983e+06	901756	2.85705e+06	2.31505e+06	1.92111e+06	6.19838e+06	4.48466e+06	2.57099e+06	7.55576e+06	3.15568e+07	6.70866e+06	5.37372e+06	2.92277e+07	1.99564e+07	2.54648e+07	6.81502e+07	1.43257e+07	8.98261e+06	1.49e+06	1.14792e+06	2.17962e+06	3.05224e+06	1.80375e+06	1.07485e+07	5.5468e+06	5.26208e+06	1.23759e+07	9.94411e+07	1.04839e+07	1.39546e+07	2.60662e+07	3.83385e+07	2.54648e+07	1.15115e+08	1.49796e+07	1.70292e+07
P35268|RL22_HUMAN;K7EJT5|K7EJT5_HUMAN	3	3	143.16	0.000265867	0.000301194	2.39248	0.995446	Competition	Control	P35268	258250	276941	233062	249645	276930	275316	377914	449779	756294	540722	808221	823602	388061	505973	394647	200406	302869	370355	209146	352542	177801	329141	260013	477422	467419	920570	1.23877e+06	1.70391e+06	1.26304e+06	2.13875e+06	346086	972028	394647	338514	316695	702116
P68104|EF1A1_HUMAN;Q5VTE0|EF1A3_HUMAN;A0A087WVQ9|A0A087WVQ9_HUMAN;A0A087WV01|A0A087WV01_HUMAN;A0A2U3TZH3|A0A2U3TZH3_HUMAN;A0A2R8Y488|A0A2R8Y488_HUMAN;A0A2R8Y660|A0A2R8Y660_HUMAN;Q5JR01|Q5JR01_HUMAN;A6PW80|A6PW80_HUMAN;A0A2R8YDN5|A0A2R8YDN5_HUMAN	15	15	1433.59	0.000266715	0.000301194	1.95027	0.995426	Probe	Competition	P68104	4.96417e+08	6.13811e+08	4.22132e+08	6.04485e+08	3.92771e+08	5.80655e+08	2.99431e+08	3.55864e+08	2.00994e+08	2.31097e+08	2.33407e+08	2.94163e+08	4.67333e+08	6.05613e+08	3.15661e+08	5.08745e+08	4.74711e+08	7.77533e+08	4.02028e+08	7.81373e+08	3.22041e+08	7.96976e+08	3.68778e+08	1.0069e+09	3.70347e+08	7.28353e+08	3.29217e+08	7.28228e+08	3.64756e+08	7.63888e+08	4.16783e+08	1.16345e+09	3.15661e+08	8.59341e+08	4.96381e+08	1.47404e+09
D3YTB1|D3YTB1_HUMAN;D3YTI8|D3YTI8_HUMAN	9	7	558.43	0.000271209	0.000304838	1.72333	0.995318	Control	Competition	D3YTB1	1.16727e+07	1.14685e+07	1.41169e+07	1.76635e+07	1.20804e+07	1.46186e+07	9.78814e+06	8.90663e+06	6.26376e+06	4.99792e+06	8.30845e+06	9.09719e+06	1.21699e+07	1.34293e+07	1.26851e+07	1.47555e+07	1.00679e+07	1.44162e+07	9.45326e+06	1.45992e+07	1.07697e+07	2.32882e+07	1.13425e+07	2.53499e+07	1.21063e+07	1.82293e+07	1.02597e+07	1.57494e+07	1.2984e+07	2.36238e+07	1.08535e+07	2.57992e+07	1.26851e+07	2.4924e+07	1.05275e+07	2.73301e+07
Q5T8U5|Q5T8U5_HUMAN;B7Z1G8|B7Z1G8_HUMAN	6	6	352.22	0.000272652	0.000305035	8.84677	0.995284	Competition	Control	Q5T8U5	371816	367585	278334	326954	299672	45623.7	1.22145e+06	698923	2.26666e+06	2.7169e+06	2.4983e+06	5.54868e+06	725650	195394	691007	143413	369171	369072	301119	467931	212339	431068	281366	79115.3	1.51073e+06	1.4305e+06	3.71266e+06	8.56144e+06	3.9042e+06	1.44089e+07	647158	375373	691007	242245	386023	699685
P16435|NCPR_HUMAN;H0Y4R2|H0Y4R2_HUMAN;E7EMD0|E7EMD0_HUMAN;E7EWU0|E7EWU0_HUMAN	6	6	238.32	0.000274673	0.000305873	17.7131	0.995235	Competition	Control	P16435	1667.26	6931.63	1431.74	1880.2	956.693	5154.15	6186.67	27882.4	89574.2	20807.9	144774	29994.9	8525.24	5924.46	4963.08	14444.7	8345.92	21968.1	1350.25	8823.87	1092.26	2478.93	898.252	8937.73	7651.91	57067.3	146718	65569.4	226244	77891.3	7603.09	11381.5	4963.08	24399.1	8726.91	41647
P29317|EPHA2_HUMAN	3	3	131.24	0.000286352	0.000317409	7.02884	0.994953	Competition	Control	P29317	11360	6028.87	6615.86	41677.5	6782.15	6275.87	48660.4	49663.1	125968	81581.3	106956	140624	53842.7	126153	38707.1	44206.5	16160.2	13139.3	9200.01	7674.67	5047.18	54949.1	6367.85	10882.9	60185	101646	206329	257077	167145	365175	48018.7	242353	38707.1	74670.9	16897.9	24909.3
O95202|LETM1_HUMAN	11	11	566.32	0.000295655	0.000326219	7.64938	0.994727	Competition	Control	O95202	42568.3	71308	33897.2	63597.4	63535.6	97101.5	402421	310225	104837	325348	942386	760413	67337.3	54274.8	259848	44318.2	92546.5	138963	34474.3	90774	25859.9	83849.1	59654.4	168382	497730	634943	171717	1.02523e+06	1.47271e+06	1.97466e+06	60053.6	104268	259848	74859.6	96771.3	263445
Q08380|LG3BP_HUMAN;K7EP36|K7EP36_HUMAN;K7EKQ5|K7EKQ5_HUMAN;K7EJD3|K7EJD3_HUMAN;K7EJY8|K7EJY8_HUMAN;K7EN99|K7EN99_HUMAN	10	10	592.15	0.000301505	0.000331154	5.38027	0.994584	Competition	Control	Q08380	165185	222749	189023	200911	98065.8	211285	397384	511460	1.65703e+06	2.05659e+06	811041	416023	616690	897726	425105	466888	319033	427344	133777	283556	144204	264888	92075.3	366386	491499	1.04681e+06	2.71413e+06	6.48068e+06	1.26745e+06	1.08034e+06	549984	1.72463e+06	425105	788640	333597	810155
Q15691|MARE1_HUMAN;C9JB30|C9JB30_HUMAN	5	5	164.27	0.000350948	0.000383706	15.9387	0.993359	Competition	Control	Q15691	28312.8	5889.62	17789.7	16957.6	17126	495.6	191717	115387	333903	64532	512435	161856	58090.3	21070	29247.6	44192.1	16985	19959.7	22929.4	7497.4	13571.6	22357.5	16079.8	859.411	237124	236164	546916	203352	800804	420310	51806.8	40477.8	29247.6	74646.6	17760.3	37839.5
E7ETU9|E7ETU9_HUMAN;C9JXZ0|C9JXZ0_HUMAN	7	7	281.19	0.000354241	0.000385554	16.6248	0.993277	Competition	Control	E7ETU9	11071.6	31757	7385.16	7162.01	30806.8	30768.1	164520	76115.5	166905	383316	752271	434406	118708	277669	29315.3	21849.6	17544.1	26542.7	8966.43	40426.2	5634.08	9442.66	28924.9	53354.4	203485	155787	273381	1.2079e+06	1.17561e+06	1.12807e+06	105868	533433	29315.3	36907.1	18345	50319.4
P16403|H12_HUMAN;P22492|H1T_HUMAN	3	3	142.68	0.000364285	0.0003947	2.42019	0.993024	Control	Competition	P16403	2.18441e+06	1.56664e+06	1.89555e+06	1.53449e+06	1.46363e+06	3.33562e+06	784542	792771	590599	1.41644e+06	711895	653922	1.13902e+06	1.95852e+06	1.07778e+06	1.20992e+06	1.38344e+06	1.86383e+06	1.76907e+06	1.99431e+06	1.4461e+06	2.02313e+06	1.37422e+06	5.78424e+06	970352	1.62258e+06	967369	4.46345e+06	1.11251e+06	1.69812e+06	1.01582e+06	3.76254e+06	1.07778e+06	2.04373e+06	1.4466e+06	3.53344e+06
Q9NRX5|SERC1_HUMAN	2	2	131.29	0.000369176	0.000398206	9.3553	0.992901	Probe	Control	Q9NRX5	2532.29	60805.4	6214.2	14608.4	5764.7	8471.35	60027.6	71425.4	58422.8	57284.9	82759	202836	118154	121147	172704	332870	157277	18375.1	2050.8	77404.4	4740.76	19260.2	5412.55	14690	74244.5	146187	95693.4	180515	129331	526729	105374	232737	172704	562263	164456	34835.5
Q5JXB2|UE2NL_HUMAN	1	1	56.68	0.000373002	0.000400537	17.3318	0.992804	Competition	Control	Q5JXB2	4027.05	17909.9	1605.75	5943.09	8806.8	19681.9	195572	17424.7	195320	296670	249901	49912.7	23544.7	57076.7	10629.8	26998.6	50998.7	33904.7	3261.34	22799.1	1225.01	7835.58	8268.82	34130	241891	35663.4	319924	934860	390531	129614	20998	109651	10629.8	45604.4	53326.7	64276.3
Q99805|TM9S2_HUMAN	2	2	91.7	0.000393922	0.000420908	5.95322	0.992274	Competition	Control	Q99805	121688	27411.4	115942	46013.1	105947	24441.4	287208	310215	436492	536931	481623	575541	298806	235444	387661	40997.4	193310	222180	98550.4	34894.3	88451.2	60665.4	99475.4	42383.4	355230	634922	714949	1.69197e+06	752653	1.49458e+06	266485	452314	387661	69250.4	202135	421208
Q9Y5M8|SRPRB_HUMAN;H7C4H2|H7C4H2_HUMAN;C9J5Z8|C9J5Z8_HUMAN	5	5	249.48	0.000395473	0.000420908	12.3448	0.992235	Competition	Control	Q9Y5M8	46080.3	27135.2	34081.7	75596.6	9931.27	34708.8	145361	495602	497399	360419	329468	980615	302209	156386	124390	12653.9	188345	97949.8	37318.5	34542.7	26000.7	99669.3	9324.59	60187.9	179788	1.01436e+06	814712	1.13575e+06	514875	2.54648e+06	269520	300435	124390	21374.3	196943	185693
A0A087WVQ6|A0A087WVQ6_HUMAN;J3KS13|J3KS13_HUMAN;A0A087WX41|A0A087WX41_HUMAN;J3KSQ2|J3KSQ2_HUMAN;J3KRF5|J3KRF5_HUMAN;J3QL20|J3QL20_HUMAN;F5H5N6|F5H5N6_HUMAN	50	44	2966.7	0.000405567	0.00042975	2.82431	0.991978	Competition	Control	A0A087WVQ6	1.23005e+06	877656	904131	703329	936213	372082	2.49854e+06	1.80036e+06	3.05164e+06	2.51405e+06	2.75198e+06	1.57123e+06	2.31872e+06	2.00806e+06	1.62356e+06	825222	1.10677e+06	1.4024e+06	996164	1.11724e+06	689754	927295	879023	645221	3.0903e+06	3.68482e+06	4.99841e+06	7.92224e+06	4.30063e+06	4.08019e+06	2.06791e+06	3.8577e+06	1.62356e+06	1.39391e+06	1.15729e+06	2.65866e+06
P33176|KINH_HUMAN;A0A0G2JMZ6|A0A0G2JMZ6_HUMAN	4	4	190.55	0.00042445	0.000447787	4.18089	0.991495	Competition	Control	P33176	59488.9	48437.7	79608.1	90007.5	66182.5	108148	283428	103443	219532	484783	441956	356088	200022	72495.8	87412.7	41191.1	113518	108991	48177.6	61660.5	60732.4	118669	62139.6	187537	350554	211718	359581	1.52764e+06	690663	924696	178386	139272	87412.7	69577.4	118700	206624
A0A3B3ITV0|A0A3B3ITV0_HUMAN	1	1	44.15	0.000432506	0.000454293	21.3165	0.991288	Competition	Control	A0A3B3ITV0	10909.7	8312.06	7390.16	14495.6	10355.1	2440.07	138597	116386	445712	97773.4	280511	70034.7	73740.9	4745.5	48051.1	964.639	12621.6	19289.4	8835.3	10581.1	5637.9	19111.5	9722.57	4231.28	171422	238210	730052	308102	438367	181867	65764.5	9116.63	48051.1	1629.41	13197.7	36568.7
A0A087X0X3|A0A087X0X3_HUMAN;M0R019|M0R019_HUMAN;M0QZM1|M0QZM1_HUMAN;M0R2I7|M0R2I7_HUMAN;M0QYQ7|M0QYQ7_HUMAN;M0R0N3|M0R0N3_HUMAN;M0R0Y6|M0R0Y6_HUMAN;M0QY96|M0QY96_HUMAN	13	12	568.48	0.000437969	0.000456605	6.59078	0.991148	Competition	Control	A0A087X0X3	81643.4	63888.2	42677.7	79682.7	87811.1	41225.8	180750	342349	1.22378e+06	402374	363599	103219	287399	421974	258703	151649	132286	279108	66119.6	81328.8	32558.5	105057	82447	71488.9	223559	700691	2.00449e+06	1.26795e+06	568212	268040	256312	810658	258703	256156	138325	529130
V9GYA7|V9GYA7_HUMAN	1	1	49.42	0.000438504	0.000456605	6.71978	0.991134	Competition	Control	V9GYA7	17234.8	4950.33	14946	21088.1	21095.8	6791.91	63720.4	29241.5	146631	90009.7	106429	142588	31051.5	47812.1	14443.1	8143.41	36983.7	42909.9	13957.8	6301.7	11402.2	27803.3	19807.1	11777.7	78811.9	59849	240174	283637	166321	370275	27692.7	91852.2	14443.1	13755.4	38672	81348.2
Q8WUM4|PDC6I_HUMAN;A0A3B3IT07|A0A3B3IT07_HUMAN;C9IZF9|C9IZF9_HUMAN;F8WBR8|F8WBR8_HUMAN	6	6	272.91	0.000443057	0.000459357	6.65718	0.991017	Competition	Control	Q8WUM4	12067.7	19211.9	23527.3	44286.3	9054.78	43487.1	141837	81526.5	232431	282417	139045	132205	150480	43682.8	85153	16506	72361.5	22805.4	9773.1	24456.5	17948.8	58388.7	8501.65	75410.2	175429	166862	380710	889947	217292	343313	134203	83919.3	85153	27881	75664.8	43234.3
P28074|PSB5_HUMAN;H0YJM8|H0YJM8_HUMAN	5	5	210.44	0.000463059	0.000478035	3.08725	0.990502	Competition	Control	P28074	94427.9	63923.3	79058.5	88196.5	66203.6	47408.3	214250	138453	244315	183722	347449	227788	98346.3	62601.4	111433	221986	108417	46249	76473.3	81373.5	60313.1	116282	62159.4	82210	264992	283373	400175	578941	542974	591524	87708.4	120264	111433	374965	113367	87678.5
P25705|ATPA_HUMAN;K7EK77|K7EK77_HUMAN;K7ERX7|K7ERX7_HUMAN;K7EJP1|K7EJP1_HUMAN;K7ENJ4|K7ENJ4_HUMAN;K7EQH4|K7EQH4_HUMAN;K7ESA0|K7ESA0_HUMAN	19	18	1288.44	0.000471704	0.000484878	4.90566	0.990279	Competition	Control	P25705	708469	918679	639937	720114	570032	1.79641e+06	2.86296e+06	2.70843e+06	3.39948e+06	5.06475e+06	4.76398e+06	7.46354e+06	1.85351e+06	3.3243e+06	1.26015e+06	2.8335e+06	438064	896251	573760	1.16947e+06	488203	949425	535210	3.11512e+06	3.54102e+06	5.54339e+06	5.56817e+06	1.596e+07	7.44488e+06	1.93815e+07	1.65302e+06	6.38635e+06	1.26015e+06	4.78617e+06	458061	1.69911e+06
Q9BRK5|CAB45_HUMAN;G3V1E2|G3V1E2_HUMAN	2	2	87.88	0.000479363	0.000490654	11.7986	0.990081	Competition	Control	Q9BRK5	10680.6	10821.4	3593.26	5172.08	8692.28	4903.04	18446.6	17906	62778	209210	28342.1	180835	2029.7	12609	7300.01	7372.47	9050.06	11168.2	8649.75	13775.5	2741.27	6819.06	8161.3	8502.27	22815.5	36648.5	102827	659258	44291.5	469596	1810.16	24223.2	7300.01	12453.1	9463.19	21172.7
P20592|MX2_HUMAN	5	2	492.73	0.00048212	0.000491386	4.12774	0.99001	Competition	Control	P20592	109373	45566.9	107664	29875.1	43292.8	31779.9	177711	152768	307774	393434	259535	225934	96867.4	130862	108247	31012.9	114286	155923	88576.6	58006	82136	39388.4	40648.2	55109	219800	312673	504117	1.23978e+06	405587	586711	86389.5	251400	108247	52385.2	119503	295597
Q15046|SYK_HUMAN;H3BPV7|H3BPV7_HUMAN;H3BVA8|H3BVA8_HUMAN	5	5	174.65	0.00049673	0.000503485	15.8584	0.989632	Competition	Control	Q15046	1785.49	4309.42	585.761	13474	337.05	2317.95	50655.4	68863.3	67907.8	67517.5	96510.4	10270.7	2372.46	14772.4	1760.21	30274.8	12083	11342.3	1445.99	5485.83	446.873	17764.6	316.46	4019.51	62652.5	140944	111229	212760	150821	26671.2	2115.83	28379.4	1760.21	51138.3	12634.6	21502.6
P14174|MIF_HUMAN	2	2	86.87	0.000498178	0.000503485	3.39333	0.989594	Competition	Control	P14174	244442	299431	169516	298305	280400	356196	764374	345962	1.15701e+06	754022	1.14759e+06	1.42423e+06	496270	318003	495966	858176	322331	500249	197964	381171	129323	393297	263271	617673	945407	708086	1.89512e+06	2.37606e+06	1.79339e+06	3.69847e+06	442590	610918	495966	1.44958e+06	337045	948368
B0YIW6|B0YIW6_HUMAN;Q6P1Q5|Q6P1Q5_HUMAN	2	2	97.8	0.00050163	0.000504853	4.86849	0.989505	Competition	Control	B0YIW6	17333.5	34681.3	19726.6	20512.2	17603.7	24870.6	72519.9	22471.3	136668	156631	151541	116091	35988.1	52939.7	39819	30897.2	26480.2	18067.3	14037.7	44148.8	15049.2	27044.1	16528.3	43127.6	89695.4	45992.5	223854	493571	236819	301468	32095.4	101703	39819	52189.6	27689	34251.8
P52907|CAZA1_HUMAN;A0A0D9SET8|A0A0D9SET8_HUMAN	3	3	115.07	0.000519646	0.00051987	6.02635	0.989037	Competition	Control	P52907	25225.9	154890	26018.1	23183.8	62928.6	13288.9	234324	284037	250642	349650	316105	406505	201313	246252	181978	21730.7	125748	138145	20429.4	197173	19849	30566.4	59084.5	23044	289821	581343	410538	1.10181e+06	493991	1.05562e+06	179538	473077	181978	36706.2	131489	261895
Q9NZ08|ERAP1_HUMAN;H0Y9X5|H0Y9X5_HUMAN	8	8	297.52	0.000520874	0.00051987	4.28717	0.989006	Competition	Control	Q9NZ08	55580.7	119085	33299.2	80148.7	50351.7	114160	141353	268483	356233	307206	257084	610122	29728.5	149832	72563.9	149751	112158	78434.9	45012.6	151594	25403.7	105671	47275.8	197963	174831	549508	583490	968063	401756	1.58438e+06	26512.8	287844	72563.9	252950	117278	148696
P14866|HNRPL_HUMAN;A0A3B3ITJ4|A0A3B3ITJ4_HUMAN;M0R1W6|M0R1W6_HUMAN;B4DVF8|B4DVF8_HUMAN;M0QYL7|M0QYL7_HUMAN;M0R076|M0R076_HUMAN	8	6	468.37	0.000528311	0.000523435	3.58954	0.988812	Competition	Control	P14866	108972	134110	49667.6	149075	112224	71373.3	367283	264886	408617	405625	351510	447054	173071	182605	146879	22678.2	99213.1	65228.1	88251.6	170720	37891.1	196546	105369	123767	454270	542146	669293	1.2782e+06	549320	1.16092e+06	154351	350803	146879	38306.6	103742	123659
Q13263|TIF1B_HUMAN;M0R0K9|M0R0K9_HUMAN	5	5	250.16	0.000528798	0.000523435	4.98948	0.9888	Competition	Control	Q13263	84788	51627	106735	168259	114973	195414	200196	373398	1.06261e+06	1.13022e+06	544674	290289	121569	288433	175016	140098	112089	178980	68666.3	65720.4	81427.6	221839	107950	338864	247610	764240	1.7405e+06	3.56152e+06	851186	753827	108420	554111	175016	236645	117206	339309
P07900|HS90A_HUMAN;G3V2J8|G3V2J8_HUMAN;Q14568|HS902_HUMAN;Q58FG0|HS905_HUMAN;Q9NQH7|XPP3_HUMAN	29	15	1826.09	0.00053628	0.000528666	2.89158	0.988605	Probe	Control	P07900	1.04125e+06	970948	793666	756695	824310	1.14871e+06	2.50383e+06	2.39283e+06	3.12893e+06	2.6488e+06	3.7095e+06	1.18963e+06	2.70153e+06	6.07236e+06	2.01052e+06	1.59663e+06	2.0585e+06	1.56706e+06	843265	1.236e+06	605482	997655	773956	1.99196e+06	3.09684e+06	4.89744e+06	5.12502e+06	8.34684e+06	5.79699e+06	3.08926e+06	2.40931e+06	1.16657e+07	2.01052e+06	2.69693e+06	2.15247e+06	2.97083e+06
Q03135|CAV1_HUMAN;C9JKI3|C9JKI3_HUMAN;P56539|CAV3_HUMAN	2	2	104.77	0.000538878	0.000529058	5.01728	0.988538	Competition	Control	Q03135	23390.7	52279.7	22414.1	71515.9	18450	11983.9	160346	112970	190867	106230	209978	223235	149400	36195.5	82941	18413.2	26069.8	31590.7	18943.1	66551.3	17099.5	94289.2	17322.9	20781	198322	231217	312630	334752	328142	579702	133240	69535.4	82941	31102.4	27259.9	59889.5
P27797|CALR_HUMAN;K7EJB9|K7EJB9_HUMAN;K7EL50|K7EL50_HUMAN	16	16	974.06	0.000553324	0.000540293	4.28282	0.988162	Competition	Control	P27797	978840	1.66399e+06	907633	930769	823736	491521	4.10607e+06	2.53464e+06	5.56388e+06	3.31465e+06	6.75702e+06	2.54907e+06	3.82415e+06	2.89843e+06	2.12137e+06	585238	1.69664e+06	1.91309e+06	792722	2.11823e+06	692426	1.22716e+06	773417	852338	5.07855e+06	5.18768e+06	9.11333e+06	1.04451e+07	1.05595e+07	6.61948e+06	3.4105e+06	5.5682e+06	2.12137e+06	988548	1.7741e+06	3.62682e+06
Q8WYP5|ELYS_HUMAN	1	1	28.56	0.000554814	0.000540293	739.078	0.988123	Probe	Control	Q8WYP5	0	2012.75	0	0	0	0	229802	7966.09	82660.9	50311	212622	34199.3	160.849	1.43205e+06	0	14069.2	12945.1	28354	0	2562.2	0	0	0	0	284228	16304.3	135394	158539	332274	88809.4	143.45	2.75113e+06	0	23764.9	13536.1	53753.2
P27348|1433T_HUMAN;E9PG15|E9PG15_HUMAN	10	8	603.44	0.000567544	0.000550462	3.33332	0.987792	Competition	Control	P27348	683637	396177	688664	556614	514229	564764	1.94088e+06	1.77664e+06	2.31277e+06	969307	3.28823e+06	1.05907e+06	1.81462e+06	1.38331e+06	1.45174e+06	488587	1.32661e+06	1.26294e+06	553650	504328	525377	733861	482816	979348	2.40056e+06	3.63627e+06	3.78818e+06	3.05446e+06	5.13866e+06	2.7502e+06	1.61834e+06	2.65749e+06	1.45174e+06	825292	1.38717e+06	2.39427e+06
P05386|RLA1_HUMAN	1	1	74.48	0.000573309	0.00055382	6.46959	0.987642	Competition	Control	P05386	33989.5	12795.7	13371.5	17462.5	28639.4	33618.1	84080.5	175697	226891	33373.8	146966	237936	28761.9	30884.2	12330.5	91381.2	33321.8	14654.5	27526.7	16288.7	10201	23023.2	26889.9	58296.6	103994	359602	371635	105167	229671	617878	25650.8	59332	12330.5	154356	34843	27781.9
G5E972|G5E972_HUMAN;P42166|LAP2A_HUMAN;H0YJH7|H0YJH7_HUMAN	4	4	163.9	0.000584333	0.000562211	4.60619	0.987355	Competition	Control	G5E972	88568.7	91171.1	92985	46271.5	57216.4	48560.7	183691	115798	334296	513623	362097	447080	100319	144415	103885	309401	114179	54443.5	71728.1	116059	70937.6	61006	53721.2	84208.3	227196	237006	547559	1.61852e+06	565865	1.16098e+06	89467.5	277438	103885	522621	119391	103214
Q13200|PSMD2_HUMAN;H7C1H2|H7C1H2_HUMAN;C9JPC0|C9JPC0_HUMAN;H7C2Q3|H7C2Q3_HUMAN	12	10	630.19	0.000595131	0.000570319	11.6269	0.987074	Competition	Control	Q13200	41063.1	13089	37146.6	35906.5	44346.9	8975.37	423464	367424	538603	50111.8	628500	90872.5	181829	172902	137271	40083.3	91283	96934.7	33255.3	16662.1	28338.8	47340.5	41637.8	15564	523757	752014	882202	157911	982184	235979	162161	332163	137271	67706.4	95450.1	183768
P00846|ATP6_HUMAN	1	1	47.6	0.000615177	0.00058719	135.687	0.986551	Competition	Control	P00846	0	0	0	0	3437.26	0	42103	7081.03	149631	15050.3	157874	94652.1	1813.57	4675.96	1800.75	8017.34	0	0	0	0	0	0	3227.29	0	52074.7	14492.9	245088	47426.2	246716	245794	1617.4	8983.04	1800.75	13542.4	0	0
F5GXX5|F5GXX5_HUMAN;A0A0B4J239|A0A0B4J239_HUMAN	3	2	153.1	0.000627009	0.000596118	4.01443	0.986243	Competition	Control	F5GXX5	88307.2	75150.4	83388.4	156923	82866.2	183144	200548	236393	413950	509844	554874	773173	340504	76851.8	208136	168034	118035	189652	71516.3	95665.4	63616.4	206893	77804.2	317587	248045	483829	678027	1.60661e+06	867126	2.00779e+06	303672	147641	208136	283833	123424	359542
A0A2R8YGD1|A0A2R8YGD1_HUMAN;A0A2R8Y7U1|A0A2R8Y7U1_HUMAN;A0A2R8YD45|A0A2R8YD45_HUMAN;A0A2R8Y7I4|A0A2R8Y7I4_HUMAN;A0A2R8YD72|A0A2R8YD72_HUMAN;A0A2R8YDY1|A0A2R8YDY1_HUMAN	5	5	299.47	0.000633523	0.00059994	6.5738	0.986073	Probe	Competition	A0A2R8YGD1	572538	115797	684923	505570	606746	1.41668e+06	437890	301877	624609	178719	430292	245758	2.9254e+06	2.21865e+06	2.79012e+06	4.19207e+06	1.83367e+06	628288	463675	147408	522523	666562	569682	2.45663e+06	541599	617857	1.02307e+06	563175	672435	638190	2.60897e+06	4.26227e+06	2.79012e+06	7.081e+06	1.91738e+06	1.1911e+06
P05141|ADT2_HUMAN	14	5	942.14	0.000643474	0.000606974	4.70228	0.985814	Competition	Control	P05141	3.21937e+06	1.43089e+06	1.74328e+06	1.18324e+06	1.57943e+06	957724	5.04471e+06	2.7532e+06	1.3127e+07	7.11867e+06	1.30584e+07	6.45651e+06	6.99423e+06	3.18456e+06	4.63344e+06	1.93852e+06	3.297e+06	1.7363e+06	2.60724e+06	1.8215e+06	1.32994e+06	1.56003e+06	1.48294e+06	1.66077e+06	6.23949e+06	5.63503e+06	2.15013e+07	2.24322e+07	2.0407e+07	1.67664e+07	6.23768e+06	6.11789e+06	4.63344e+06	3.27442e+06	3.44751e+06	3.29167e+06
P02786|TFR1_HUMAN;G3V0E5|G3V0E5_HUMAN;H7C3V5|H7C3V5_HUMAN;F8WBE5|F8WBE5_HUMAN	8	8	376.48	0.000668202	0.000627837	6.50708	0.98517	Competition	Control	P02786	28979.8	99466.5	27743.4	37381.9	40858.8	104544	115804	224701	811933	657667	189980	205645	279489	645027	151585	168394	103213	330722	23469.6	126619	21165.2	49285.6	38362.9	181287	143231	459899	1.3299e+06	2.07243e+06	296890	534024	249257	1.23917e+06	151585	284441	107925	626981
Q9UBV2|SE1L1_HUMAN;G3V3B3|G3V3B3_HUMAN	2	2	34.47	0.000681838	0.000638156	Infinity	0.984815	Competition	Probe	Q9UBV2	0	0	969.523	0	0	0	8165.07	9161.86	38789.2	503.681	88733.4	0	0	0	0	0	0	0	0	0	739.642	0	0	0	10098.9	18751.7	63534.6	1587.19	138667	0	0	0	0	0	0	0
P00338|LDHA_HUMAN;F5GXY2|F5GXY2_HUMAN;F5GYU2|F5GYU2_HUMAN;F5GXH2|F5GXH2_HUMAN;F5GZQ4|F5GZQ4_HUMAN;A0A087WUM2|A0A087WUM2_HUMAN;F5GWW2|F5GWW2_HUMAN;Q9BYZ2|LDH6B_HUMAN	13	12	705.93	0.000698447	0.000651168	3.64024	0.984383	Competition	Control	P00338	643674	717436	846830	1.02067e+06	668639	565210	3.30361e+06	2.49527e+06	3.85805e+06	1.27729e+06	3.79332e+06	1.51688e+06	2.41666e+06	2.91542e+06	1.63948e+06	640829	1.21307e+06	1.63013e+06	521285	913286	646040	1.34569e+06	627794	980121	4.08603e+06	5.10712e+06	6.31927e+06	4.02498e+06	5.92799e+06	3.93906e+06	2.15525e+06	5.60083e+06	1.63948e+06	1.08245e+06	1.26845e+06	3.0904e+06
P78527|PRKDC_HUMAN;H0YG84|H0YG84_HUMAN	37	34	1692.82	0.000724506	0.000672855	4.16061	0.983705	Competition	Control	P78527	327358	299440	259550	313299	259766	254371	751641	437971	1.34671e+06	1.35919e+06	1.21551e+06	2.01937e+06	332597	921797	605406	152573	514664	316638	265114	381183	198009	413065	243897	441100	929659	896403	2.20583e+06	4.28304e+06	1.89952e+06	5.24394e+06	296621	1.77087e+06	605406	257717	538158	600280
E9PKU7|E9PKU7_HUMAN;E9PNH1|E9PNH1_HUMAN	16	1	971.69	0.00075388	0.000697441	3.5444	0.982943	Competition	Control	E9PKU7	24253.4	17422.6	14675.1	11973.7	12791.2	8045.51	25823.4	29425	60306	41947	107550	50972.7	29616.8	16931.1	20248.5	48197.9	21988.6	26423.8	19641.8	22178.7	11195.6	15786.5	12009.8	13951.6	31939.4	60224.6	98778	132183	168073	132367	26413.2	32526.5	20248.5	81413	22992.4	50094
P30050|RL12_HUMAN	5	5	340.17	0.000762245	0.000702479	3.38528	0.982726	Competition	Control	P30050	412162	547578	402698	208379	526542	150975	1.41989e+06	923399	1.5657e+06	1.33081e+06	1.69807e+06	673388	1.02344e+06	791499	949371	300258	660404	541670	333793	697059	307215	274734	494378	261803	1.75618e+06	1.88994e+06	2.56452e+06	4.19361e+06	2.65365e+06	1.74867e+06	912733	1.52056e+06	949371	507177	690551	1.02689e+06
Q9HD45|TM9S3_HUMAN;Q5TB53|Q5TB53_HUMAN	13	13	583.13	0.000766439	0.000703648	2.28429	0.982617	Probe	Competition	Q9HD45	3.07418e+07	3.19274e+07	1.94601e+07	1.87527e+07	2.19105e+07	2.36649e+07	1.16157e+07	1.30933e+07	9.97691e+06	1.00732e+07	1.53753e+07	1.63222e+07	2.43377e+07	3.21409e+07	1.53897e+07	2.02007e+07	3.57856e+07	4.67942e+07	2.48965e+07	4.06431e+07	1.4846e+07	2.47242e+07	2.05721e+07	4.10368e+07	1.43667e+07	2.67984e+07	1.63416e+07	3.17426e+07	2.40277e+07	4.23857e+07	2.17052e+07	6.17461e+07	1.53897e+07	3.41218e+07	3.74193e+07	8.87122e+07
P40926|MDHM_HUMAN;G3XAL0|G3XAL0_HUMAN	10	10	564.87	0.000790575	0.000723047	1.88406	0.981992	Competition	Control	P40926	1.82593e+06	2.68823e+06	1.7167e+06	2.21561e+06	2.15518e+06	2.87413e+06	3.9628e+06	4.8959e+06	4.54308e+06	3.16319e+06	5.30085e+06	3.52336e+06	2.42291e+06	2.66346e+06	2.60199e+06	2.4878e+06	4.34898e+06	4.11423e+06	1.47875e+06	3.42208e+06	1.30965e+06	2.92114e+06	2.02352e+06	4.98398e+06	4.90134e+06	1.00205e+07	7.44132e+06	9.96779e+06	8.28388e+06	9.14953e+06	2.16082e+06	5.11679e+06	2.60199e+06	4.20224e+06	4.54751e+06	7.79972e+06
X6RJP6|X6RJP6_HUMAN	6	6	248.67	0.000797958	0.000725635	2.86965	0.981801	Competition	Control	X6RJP6	155696	205050	141657	194451	159539	363069	439094	383879	889270	817431	710265	259490	387847	569541	335910	456611	297092	576889	126092	261025	108069	256371	149793	629592	543089	785690	1.45658e+06	2.57587e+06	1.10996e+06	673849	345895	1.09415e+06	335910	771279	310654	1.09366e+06
P07996|TSP1_HUMAN;A0A3B3ITK0|A0A3B3ITK0_HUMAN	9	8	377.83	0.000803774	0.000725635	5.8936	0.98165	Competition	Control	P07996	35217.2	12482.6	29956.6	107876	71454.6	25639	177142	188585	189390	184560	510731	415274	168256	298859	76928.9	68849.7	34470.8	84812.1	28521	15890.1	22853.7	142227	67089.7	44460.1	219096	385980	310211	581583	798141	1.07839e+06	150056	574142	76928.9	116297	36044.4	160786
O00461|GOLI4_HUMAN;F8W785|F8W785_HUMAN	3	3	140.71	0.000808024	0.000725635	4.92027	0.981541	Competition	Control	O00461	35137.1	64779.3	94541.2	37641.3	39449	33626.3	249689	112535	431708	263551	353064	90993.2	206793	126365	104427	432704	78885.8	102588	28456.1	82463.1	72124.8	49627.6	37039.2	58310.8	308825	230328	707113	830497	551748	236293	184425	242760	104427	730898	82487	194486
P38646|GRP75_HUMAN;A0A3B3ITI4|A0A3B3ITI4_HUMAN;D6RJI2|D6RJI2_HUMAN;D6RA73|D6RA73_HUMAN;H0Y8S0|H0Y8S0_HUMAN;H0YBG6|H0YBG6_HUMAN	24	24	1514.57	0.000808027	0.000725635	2.03169	0.981541	Competition	Control	P38646	1.98734e+06	1.85074e+06	1.31767e+06	1.60174e+06	1.24317e+06	1.36617e+06	2.37156e+06	1.89642e+06	3.53636e+06	2.62513e+06	4.15521e+06	4.44583e+06	2.45271e+06	1.66783e+06	2.03769e+06	1.44996e+06	1.68777e+06	1.99471e+06	1.60946e+06	2.35597e+06	1.00524e+06	2.1118e+06	1.16723e+06	2.36905e+06	2.93324e+06	3.88143e+06	5.79237e+06	8.27226e+06	6.49352e+06	1.1545e+07	2.1874e+06	3.20408e+06	2.03769e+06	2.44919e+06	1.76481e+06	3.78156e+06
Q14847|LASP1_HUMAN;C9J9W2|C9J9W2_HUMAN;F6S2S5|F6S2S5_HUMAN;K7ESD6|K7ESD6_HUMAN	5	5	168.44	0.000808488	0.000725635	30.4273	0.981529	Competition	Control	Q14847	12011.6	2385.33	21002.6	6165.82	3482.14	302.429	110963	23120.9	509564	60735.9	223093	452397	47239.6	90673.9	41539	3689.11	34487.6	28645.7	9727.67	3036.49	16022.7	8129.24	3269.43	524.436	137244	47322	834638	191390	348637	1.17479e+06	42129.8	174194	41539	6231.42	36061.9	54306.3
P61019|RAB2A_HUMAN;A0A3B3ITL1|A0A3B3ITL1_HUMAN;E9PE37|E9PE37_HUMAN;H7C125|H7C125_HUMAN	4	4	219.53	0.00083152	0.000743532	5.60551	0.980934	Competition	Control	P61019	32736.3	87666.2	64297.5	19095.5	61535.2	22679.4	126586	103667	226429	342474	335587	479703	59829.8	144620	110328	18289.8	49630.5	43727.9	26511.8	111598	49052.1	25176.3	57776.2	39328	156566	212178	370878	1.0792e+06	524436	1.2457e+06	53358.1	277831	110328	30894.1	51896.1	82899.1
E7EUU4|E7EUU4_HUMAN;A0A0A0MSA7|A0A0A0MSA7_HUMAN;C9JF13|C9JF13_HUMAN;H7C044|H7C044_HUMAN;C9J6B6|C9J6B6_HUMAN;H7C0V6|H7C0V6_HUMAN	6	6	277.17	0.00086236	0.000768253	2.80633	0.98014	Competition	Control	E7EUU4	113875	145903	124927	134394	165290	158226	144994	292737	451078	644475	365795	465572	211486	224687	199905	109720	205274	208490	92222.6	185732	95305.7	177190	155193	274376	179335	599150	738842	2.03086e+06	571644	1.20901e+06	188610	431649	199905	185332	214644	395254
Q01813|PFKAP_HUMAN;B1APP6|B1APP6_HUMAN;Q5VSR5|Q5VSR5_HUMAN;V9GY25|V9GY25_HUMAN;V9GYV7|V9GYV7_HUMAN;H0Y3Y3|H0Y3Y3_HUMAN;H0Y757|H0Y757_HUMAN;P17858|PFKAL_HUMAN	16	14	969.87	0.000867118	0.000769641	3.59578	0.980017	Competition	Control	Q01813	368606	360804	297632	252649	361825	166733	791606	1.10051e+06	439746	694583	1.6715e+06	1.80411e+06	862958	569104	795669	276769	733387	674016	298519	459298	227061	333101	339722	289129	979089	2.25244e+06	720281	2.18876e+06	2.61213e+06	4.68495e+06	769614	1.09331e+06	795669	467501	766867	1.27779e+06
P08758|ANXA5_HUMAN;D6RBE9|D6RBE9_HUMAN;D6RBL5|D6RBL5_HUMAN;E9PHT9|E9PHT9_HUMAN;D6RCN3|D6RCN3_HUMAN	10	10	838.45	0.000878283	0.000776684	6.1664	0.97973	Competition	Control	P08758	159807	265927	152172	324582	268194	994778	1.96376e+06	558987	3.9736e+06	623600	3.71067e+06	2.52249e+06	773594	838659	1.16787e+06	965303	769965	672316	129421	338522	116091	427941	251811	1.72503e+06	2.42885e+06	1.14409e+06	6.50854e+06	1.96508e+06	5.79882e+06	6.55046e+06	689916	1.61116e+06	1.16787e+06	1.63053e+06	805114	1.27457e+06
P62851|RS25_HUMAN	4	4	166.42	0.000892404	0.000786281	3.75754	0.979368	Competition	Control	P62851	261458	311596	164085	466935	368013	272863	665514	510097	1.67621e+06	1.59976e+06	1.83768e+06	643214	676701	498395	558275	461832	213661	442245	211744	396657	125180	615624	345532	473167	823134	1.04402e+06	2.74553e+06	5.04114e+06	2.87182e+06	1.67031e+06	603504	957472	558275	780099	223415	838406
B9A067|B9A067_HUMAN;C9J406|C9J406_HUMAN;A0A087WYS0|A0A087WYS0_HUMAN	6	6	326.86	0.000938962	0.000824284	6.61905	0.978176	Competition	Control	B9A067	28157.7	64400.2	23083.2	13462.3	6156.38	8059.77	150277	88197.6	76407.8	143757	188800	301199	82974.8	134178	18414.8	24514	35074.8	14616.5	22803.7	81980.5	17610	17749.2	5780.31	13976.3	185868	180516	125152	453006	295046	782158	73999.6	257770	18414.8	41407.6	36676	27709.8
F5H3P3|F5H3P3_HUMAN;F5H2R5|F5H2R5_HUMAN	2	2	60.27	0.000947075	0.000828382	5.97512	0.977969	Competition	Probe	F5H3P3	28706.4	12218.9	37262.8	12078.8	23450.8	121291	131785	126762	104819	209034	303998	263448	54970.2	3732.97	61920.6	33556.9	15227.5	21357.2	23248.1	15554.5	28427.5	15925.2	22018.2	210329	162997	259446	171688	658703	475070	684126	49024.2	7171.45	61920.6	56682.3	15922.6	40488.9
P16189|1A31_HUMAN;P16190|1A33_HUMAN;P30453|1A34_HUMAN;P10314|1A32_HUMAN;P30457|1A66_HUMAN;A0A140T8Y4|A0A140T8Y4_HUMAN;A0A0G2JPD3|A0A0G2JPD3_HUMAN;A0A140T975|A0A140T975_HUMAN;A0A140T8W8|A0A140T8W8_HUMAN;P01891|1A68_HUMAN	16	2	1393.56	0.000954506	0.00083031	6.43427	0.977779	Competition	Control	P16189	74845.9	30057.5	67793.2	150861	43536.3	52614.1	145990	135707	653466	922240	296089	547021	328308	137175	182279	69937.5	118909	134332	60614.6	38262.8	51718.9	198901	40876.8	91237.2	180566	277753	1.07034e+06	2.90615e+06	462711	1.42052e+06	292796	263528	182279	118134	124337	254665
P25398|RS12_HUMAN	5	5	178.52	0.000956183	0.00083031	4.20144	0.977737	Competition	Control	P25398	53715.4	34537.2	79285.3	44756.3	61381.8	19825.5	97092.9	157351	207023	252527	183105	336031	121432	39751.2	104953	194427	62861	38161.6	43501.9	43965.4	60486.2	59008.4	57632.2	34379	120088	322053	339093	795759	286146	872612	108297	76366.5	104953	328414	65730.6	72346.5
A0A3B3ITT5|A0A3B3ITT5_HUMAN	2	2	104.67	0.00100522	0.000867271	1.6508	0.97649	Probe	Competition	A0A3B3ITT5	9.81847e+06	7.47428e+06	1.10169e+07	8.96206e+06	9.69837e+06	8.37864e+06	8.63977e+06	7.29223e+06	4.87956e+06	4.34225e+06	7.3487e+06	5.39351e+06	1.23193e+07	8.2738e+06	1.23961e+07	9.10477e+06	1.05375e+07	9.92733e+06	7.95157e+06	9.51466e+06	8.40469e+06	1.18159e+07	9.10593e+06	1.45293e+07	1.0686e+07	1.49251e+07	7.99245e+06	1.36832e+07	1.14841e+07	1.4006e+07	1.09867e+07	1.58949e+07	1.23961e+07	1.53792e+07	1.10186e+07	1.88202e+07
A0A3B3ISF9|A0A3B3ISF9_HUMAN;B4DKB2|B4DKB2_HUMAN;E9PHZ1|E9PHZ1_HUMAN;E9PJG1|E9PJG1_HUMAN	18	17	1086.86	0.00100596	0.000867271	5.78435	0.976471	Probe	Control	A0A3B3ISF9	251312	243808	424817	339431	306179	163667	1.22351e+06	381143	2.82069e+06	502292	1.77041e+06	925784	3.47258e+06	1.83739e+06	2.33042e+06	639965	1.04647e+06	675533	203527	310364	324090	447518	287476	283813	1.51328e+06	780092	4.62014e+06	1.58281e+06	2.76669e+06	2.40409e+06	3.09696e+06	3.52983e+06	2.33042e+06	1.08099e+06	1.09424e+06	1.28067e+06
Q9BYE4|SPR2G_HUMAN;Q96RM1|SPR2F_HUMAN	2	2	76.46	0.0010455	0.000898144	1.87037	0.975471	Control	Competition	Q9BYE4	449104	333277	419123	277037	459683	685592	273603	225872	187129	264102	200433	251694	441002	340450	309009	569331	384651	346193	363711	424257	319746	365256	431602	1.18887e+06	338403	462297	306507	832234	313226	653605	393300	654042	309009	961679	402210	656310
A0A087X0V5|A0A087X0V5_HUMAN;F8W1C5|F8W1C5_HUMAN	8	8	374.19	0.00114991	0.000984317	5.63092	0.972851	Competition	Control	A0A087X0V5	104224	53330	66613.3	42400.1	51333.3	41534.9	228669	190920	645415	210820	428873	319257	369211	63847.5	170236	29195.2	51907.6	152616	84406.6	67888.4	50818.8	55901.8	48197.5	72024.9	282826	390759	1.05715e+06	664333	670218	829051	329274	122658	170236	49314.7	54277.2	289329
P30153|2AAA_HUMAN;B3KQV6|B3KQV6_HUMAN;C9J9C1|C9J9C1_HUMAN;E9PH38|E9PH38_HUMAN;H0YDG7|H0YDG7_HUMAN	12	9	694.92	0.0012242	0.00104419	6.56927	0.971008	Competition	Control	P30153	131770	163175	92295.7	151415	135658	97439.2	657800	671770	1.10565e+06	111677	1.01481e+06	1.50814e+06	390385	131135	386701	160560	318308	360819	106715	207719	70411.7	199631	127371	168968	813593	1.37492e+06	1.81099e+06	351913	1.58589e+06	3.91636e+06	348158	251925	386701	271208	332839	684039
A0A0U1RQT9|A0A0U1RQT9_HUMAN	1	1	42.8	0.00124167	0.00104891	7.7245	0.970577	Competition	Control	A0A0U1RQT9	17226	19727	12039.4	25730.4	16070.9	10818.5	22833.9	168111	142213	121958	130156	199634	36962.2	12973.8	56200.2	13326.6	65435.2	119351	13950.6	25112.1	9184.8	33924	15089.1	18760.3	28241.8	344075	232936	384310	203400	518414	32964.1	24924.1	56200.2	22510.4	68422.3	226265
Q9H223|EHD4_HUMAN	3	3	97.25	0.00124382	0.00104891	43.3073	0.970524	Competition	Control	Q9H223	5490.51	162.91	2461.73	8241.07	121.585	1106.43	38999	6438.6	118462	132960	119894	344772	25017	45367.7	23110.6	1569.6	4254.84	1809.39	4446.54	207.382	1878.03	10865.3	114.158	1918.64	48235.4	13178	194035	418983	187363	895310	22311	87156.3	23110.6	2651.27	4449.07	3430.23
M0QXU7|M0QXU7_HUMAN;M0QXM9|M0QXM9_HUMAN;M0R124|M0R124_HUMAN	3	3	154.08	0.00124391	0.00104891	115.768	0.970522	Competition	Control	M0QXU7	1731.46	6005.08	1198.33	1554.19	1355.83	1434.97	25734.1	11615.4	44789.1	62545.2	41216.7	1.35148e+06	7521.38	892.622	47308.6	9621.91	39978	9216.07	1402.24	7644.38	914.198	2049.1	1273.01	2488.35	31828.9	23773.5	73362.2	197091	64411.1	3.50954e+06	6707.81	1714.82	47308.6	16252.7	41803	17471.8
P21333|FLNA_HUMAN;Q60FE5|Q60FE5_HUMAN;A0A087WWY3|A0A087WWY3_HUMAN;F8WE98|F8WE98_HUMAN;H0Y5F3|H0Y5F3_HUMAN;H0Y5C6|H0Y5C6_HUMAN;H7C2E7|H7C2E7_HUMAN	53	48	2932.81	0.00124717	0.00104891	1.81144	0.970441	Competition	Control	P21333	1.10775e+06	1.02325e+06	1.09682e+06	1.36961e+06	1.18769e+06	1.6174e+06	2.53525e+06	1.17763e+06	2.33313e+06	2.09176e+06	2.6544e+06	2.61703e+06	1.69126e+06	1.4836e+06	1.77991e+06	1.4097e+06	1.29185e+06	1.50896e+06	897123	1.30258e+06	836752	1.80574e+06	1.11513e+06	2.8047e+06	3.13569e+06	2.41028e+06	3.82155e+06	6.59151e+06	4.14815e+06	6.79596e+06	1.50832e+06	2.85015e+06	1.77991e+06	2.38118e+06	1.35082e+06	2.86068e+06
P28070|PSB4_HUMAN	4	4	181.32	0.00125889	0.00105508	4.45287	0.970153	Competition	Control	P28070	69633.3	68834.8	68830.1	56119.2	73197.6	230391	338655	149781	727611	506775	674704	127280	111981	40621.1	124143	68966.6	142992	107234	56393.1	87625.7	52510	73989.6	68726.2	399517	418861	306559	1.19179e+06	1.59694e+06	1.05439e+06	330524	99868.2	78037.5	124143	116494	149520	203293
P49720|PSB3_HUMAN;A0A087WUL2|A0A087WUL2_HUMAN	3	3	226.9	0.00126592	0.00105729	6.98134	0.96998	Competition	Control	P49720	13937.9	42883.7	27270.9	27692.2	19693	229778	315906	420506	68825	676691	526236	513884	132867	169357	93370.9	588501	67065.4	168353	11287.7	54590.4	20804.7	36510.5	18490	398454	390725	860656	112732	2.13238e+06	822371	1.33446e+06	118495	325353	93370.9	994061	70127	319163
K7ENG2|K7ENG2_HUMAN	5	5	261.87	0.00127764	0.00106339	2.78267	0.969692	Competition	Control	K7ENG2	240156	81140.3	308343	401531	449721	234513	591133	579367	993986	715099	836275	1.05754e+06	354878	391315	334087	292217	400994	704622	194492	103290	235232	529393	422249	406664	731136	1.1858e+06	1.62809e+06	2.25341e+06	1.30688e+06	2.74625e+06	316492	751759	334087	493595	419299	1.33582e+06
O75844|FACE1_HUMAN	4	4	173.23	0.00128874	0.00106893	10.8088	0.96942	Competition	Control	O75844	11941.1	13100.4	9752.59	18633.8	17722.3	21540.3	31488.5	42296.7	119755	182282	100385	525668	63498.7	59099.9	33476.2	18909.1	22123.4	8324.36	9670.6	16676.6	7440.18	24567.4	16639.7	37352.7	38946.2	86569.3	196152	574404	156876	1.36506e+06	56630.2	113537	33476.2	31940.1	23133.3	15781.3
O96005|CLPT1_HUMAN;K7EQQ1|K7EQQ1_HUMAN;K7EJ16|K7EJ16_HUMAN;K7ERL5|K7ERL5_HUMAN	11	11	704.7	0.00130199	0.0010762	3.12876	0.969096	Competition	Control	O96005	1.13796e+06	378994	901952	746813	928174	263181	2.17616e+06	923212	2.36599e+06	1.91491e+06	3.5766e+06	2.67539e+06	952401	716533	1.14029e+06	1.20813e+06	623340	517152	921589	482454	688092	984626	871475	456377	2.69156e+06	1.88955e+06	3.87535e+06	6.03423e+06	5.58931e+06	6.94749e+06	849382	1.37654e+06	1.14029e+06	2.0407e+06	651795	980413
A0A0C4DGA2|A0A0C4DGA2_HUMAN;C9JB63|C9JB63_HUMAN;F8W6J1|F8W6J1_HUMAN	4	4	181.78	0.00130649	0.00107622	3.87125	0.968986	Competition	Control	A0A0C4DGA2	81759.4	76774.7	43373.5	27332.8	49681.5	65741.9	227819	159026	180609	171367	508126	87331.5	121503	94658.6	131701	38364.9	70723.9	87147.8	66213.6	97733.2	33089.3	36036.6	46646.6	114002	281776	325482	295827	540009	794070	226784	108361	181849	131701	64803.7	73952.5	165214
P60468|SC61B_HUMAN;S4R3B5|S4R3B5_HUMAN	2	2	99.7	0.00133206	0.00109354	5.39362	0.968362	Competition	Control	P60468	187079	100142	180090	168985	171830	179501	715230	847486	1.01207e+06	127819	1.2376e+06	1.38668e+06	661288	687746	404384	258781	338604	400309	151508	127479	137389	222796	161333	311269	884625	1.73456e+06	1.65772e+06	402781	1.93404e+06	3.60096e+06	589758	1.32124e+06	404384	437117	354061	758903
P60953|CDC42_HUMAN;Q5JYX0|Q5JYX0_HUMAN;A0A494BZX6|A0A494BZX6_HUMAN;A0A3B3IRV0|A0A3B3IRV0_HUMAN	4	4	196.07	0.00142619	0.00116684	2.24915	0.966083	Competition	Control	P60953	175843	598898	191615	278346	182063	482441	518674	803101	657295	847469	799506	668039	473338	592669	427386	922523	469723	650865	142408	762389	146181	366982	170941	836593	641516	1.64372e+06	1.07661e+06	2.67053e+06	1.24942e+06	1.73478e+06	422138	1.13858e+06	427386	1.55827e+06	491166	1.23391e+06
Q86UP2|KTN1_HUMAN;G3V4Y7|G3V4Y7_HUMAN;G3V5P0|G3V5P0_HUMAN;H0YJV5|H0YJV5_HUMAN;H0YJZ8|H0YJZ8_HUMAN	8	8	250.88	0.00144581	0.00117888	26.5037	0.965611	Competition	Control	Q86UP2	3317.18	2384.88	4679.8	1771.03	2026.91	4025.5	35912.4	2199.24	156655	94142.6	150715	42883	10349.4	8278.52	316.345	4200.26	1734.16	2963.85	2686.44	3035.92	3570.18	2334.99	1903.09	6980.54	44417.8	4501.23	256592	296661	235528	111359	9229.94	15903.9	316.345	7094.82	1813.33	5618.86
P81605|DCD_HUMAN	5	5	455.31	0.00148703	0.00120839	2.58802	0.964625	Control	Competition	P81605	1.47909e+07	2.25226e+07	1.01104e+07	1.98559e+07	1.36469e+07	1.52079e+07	8.95577e+06	1.26234e+07	5.2506e+06	2.66562e+06	4.85284e+06	2.79773e+06	1.07035e+07	1.64333e+07	1.04121e+07	9.50488e+06	8.34162e+06	1.53152e+07	1.19785e+07	2.8671e+07	7.71314e+06	2.61787e+07	1.28133e+07	2.63717e+07	1.10768e+07	2.58365e+07	8.60019e+06	8.39986e+06	7.58375e+06	7.2652e+06	9.54569e+06	3.15702e+07	1.04121e+07	1.60551e+07	8.72241e+06	2.90344e+07
P04114|APOB_HUMAN	3	1	120.66	0.00150832	0.00122157	22.4312	0.964117	Probe	Control	P04114	21665	9266.71	18477.8	33425.7	22766.3	133.17	6053.76	241384	7345.16	2321.33	7299.03	21594.5	639749	682938	340059	230085	161476	317453	17545.6	11796.4	14096.6	44069.7	21375.5	230.928	7487.53	494045	12031	7314.93	11406.5	56077.1	570549	1.312e+06	340059	388645	168847	601825
Q5HY57|Q5HY57_HUMAN	2	2	108.76	0.00152545	0.00123129	11.7042	0.96371	Competition	Probe	Q5HY57	7637.01	1961.76	2475.56	4190.96	8796.96	1215.7	9021.02	40060.8	69709.5	38990.8	64687.4	59909.2	1661.3	72.9474	3646.97	6052.91	6761.09	5931.16	6184.9	2497.29	1888.58	5525.51	8259.58	2108.13	11157.6	81993	114180	122867	101090	155573	1481.6	140.14	3646.97	10224.2	7069.73	11244.3
A0A1W2PP35|A0A1W2PP35_HUMAN;A0A1W2PRZ7|A0A1W2PRZ7_HUMAN;A0A1W2PQD4|A0A1W2PQD4_HUMAN;A0A1W2PPE9|A0A1W2PPE9_HUMAN;A0A1W2PP22|A0A1W2PP22_HUMAN	9	8	431.35	0.00153444	0.0012344	6.03531	0.963497	Competition	Control	A0A1W2PP35	527461	298220	366443	225670	506914	204452	1.31536e+06	1.05319e+06	4.13825e+06	2.0756e+06	2.57351e+06	1.69424e+06	866657	1.13043e+06	834024	69173.9	522619	178302	427169	379630	279557	297532	475949	354536	1.62689e+06	2.15558e+06	6.77823e+06	6.5406e+06	4.02174e+06	4.39962e+06	772913	2.17167e+06	834024	116844	546477	338023
Q06481|APLP2_HUMAN	2	2	70.02	0.0015577	0.00124576	5.61205	0.962946	Probe	Control	Q06481	29343.7	11611.4	21271.8	26206.9	14349.1	18155.4	19092	18094.7	65347.1	14240.6	31754.3	15382.6	208229	203162	91016	113469	32772.6	30062.1	23764.2	14781.2	16228.1	34552.2	13472.6	31482.9	23613.7	37034.7	107035	44874.7	49623.8	39945.8	185706	390297	91016	191666	34268.6	56991.6
P42126|ECI1_HUMAN;Q96DC0|Q96DC0_HUMAN;H3BS70|H3BS70_HUMAN	5	5	188.1	0.00155891	0.00124576	3.70637	0.962917	Competition	Control	P42126	87013.4	278285	60996.5	236975	139239	151106	369937	268828	750541	588284	817347	739519	384554	429943	199364	228242	175171	706480	70468.6	354253	46533.8	312437	130733	262031	457552	550215	1.22935e+06	1.85379e+06	1.2773e+06	1.9204e+06	342958	825967	199364	385533	183167	1.33934e+06
Q16555|DPYL2_HUMAN	6	5	196.35	0.00157697	0.00125602	3.82926	0.962491	Competition	Control	Q16555	72947.5	65146.8	94801.3	75985.7	113363	28647.5	350460	136829	340697	101334	444167	353094	234445	176426	125852	76599.5	125036	134876	59077.2	82931	72323.1	100182	106438	49677.2	433462	280050	558042	319322	694118	916922	209085	338933	125852	129387	130744	255697
F5H6I7|F5H6I7_HUMAN;F5GWF8|F5GWF8_HUMAN	2	1	68.07	0.00159726	0.00126798	61.3429	0.962013	Competition	Control	F5H6I7	0	516.405	0	0	0	0	235.772	8204.24	17.5401	6320.63	4366.55	12533	0	0	22.0563	551.225	27.1306	0	0	657.376	0	0	0	0	291.612	16791.7	28.7297	19917.5	6823.79	32545.9	0	0	22.0563	931.095	28.3691	0
Q9BU23|LMF2_HUMAN	2	2	100.92	0.00160632	0.00127098	17.3569	0.9618	Competition	Control	Q9BU23	0	27406.1	0	0	0	43315.4	278879	281288	258359	10771.6	329167	69042.1	5683.89	71805.7	3784.57	21736.8	4387.2	45190.1	0	34887.6	0	0	0	75112.5	344929	575717	423177	33943.3	514403	179290	5069.08	137947	3784.57	36716.4	4587.47	85671
P11279|LAMP1_HUMAN	1	1	41.8	0.00168329	0.00132751	3.72599	0.960001	Competition	Control	P11279	17728.5	92067.5	20079.1	42096.4	13881.4	602090	252810	281107	774546	694073	458201	475132	913096	685740	183979	266009	198503	261993	14357.6	117201	15318.2	55501.4	13033.5	1.04407e+06	312686	575347	1.26866e+06	2.18715e+06	716050	1.23383e+06	814328	1.31738e+06	183979	449325	207565	496685
H0UI06|H0UI06_HUMAN;D6R9C3|D6R9C3_HUMAN	2	2	73.03	0.00169531	0.00133025	8.78968	0.959721	Competition	Control	H0UI06	100729	94928.4	62063.7	17019.4	149650	6294.32	305584	457341	789063	970679	925143	337769	192272	148483	198929	18542.7	209663	342473	81576.2	120843	47347.9	22439	140508	10914.9	377958	936048	1.29244e+06	3.05879e+06	1.44576e+06	877126	171474	285253	198929	31321.2	219234	649258
P00505|AATM_HUMAN	6	5	287.71	0.00169783	0.00133025	4.72545	0.959663	Competition	Control	P00505	190475	296582	130904	52526.7	119243	124981	606652	178490	981904	716408	914097	924867	360183	518160	357551	95754.3	262984	255586	154258	377544	99865.4	69253.1	111958	216728	750331	365318	1.60831e+06	2.25753e+06	1.4285e+06	2.40171e+06	321223	995442	357551	161742	274989	484537
Q96N66|MBOA7_HUMAN	3	3	156.25	0.00170625	0.0013303	2.48353	0.959468	Competition	Control	Q96N66	602626	374832	556990	325143	446631	237479	898403	1.01376e+06	1.28718e+06	809872	1.45609e+06	852059	1.03452e+06	1.08222e+06	801244	295101	796726	733321	488042	477155	424924	428680	419347	411809	1.11118e+06	2.07488e+06	2.10833e+06	2.55205e+06	2.2755e+06	2.21264e+06	922618	2.07907e+06	801244	498466	833097	1.39023e+06
P62753|RS6_HUMAN;A2A3R5|A2A3R5_HUMAN;A2A3R7|A2A3R7_HUMAN	6	6	399.36	0.00170895	0.0013303	1.38035	0.959405	Probe	Competition	P62753	9.59419e+06	9.51564e+06	9.55817e+06	7.15758e+06	8.81533e+06	8.02465e+06	7.52875e+06	6.83484e+06	5.98118e+06	4.70421e+06	7.14813e+06	6.99525e+06	8.97704e+06	7.59059e+06	1.04036e+07	9.95731e+06	9.22925e+06	7.94156e+06	7.76994e+06	1.21133e+07	7.29185e+06	9.43682e+06	8.27683e+06	1.39154e+07	9.31185e+06	1.3989e+07	9.79685e+06	1.48238e+07	1.11707e+07	1.81654e+07	8.00601e+06	1.45824e+07	1.04036e+07	1.68193e+07	9.65056e+06	1.50556e+07
P62191|PRS4_HUMAN	3	2	104.06	0.00173152	0.00134059	3.73096	0.958883	Competition	Control	P62191	32606.1	42488.7	122968	41499	84960.6	32253.7	205566	154326	284966	79875.6	291879	314503	109916	212150	99330.4	44474.6	99580	94258.8	26406.3	54087.6	93811.3	54713.8	79770.7	55930.7	254252	315862	466758	251703	456131	816708	98026.6	407564	99330.4	75123.9	104126	178695
P06733|ENOA_HUMAN;A0A2R8Y6G6|A0A2R8Y6G6_HUMAN;K7EM90|K7EM90_HUMAN;A0A2R8YEM5|A0A2R8YEM5_HUMAN;A0A2R8Y879|A0A2R8Y879_HUMAN;K7ERS8|K7ERS8_HUMAN;P13929|ENOB_HUMAN;A0A2R8Y798|A0A2R8Y798_HUMAN;A0A2R8Y6I8|A0A2R8Y6I8_HUMAN	19	15	1554.9	0.00173485	0.00134059	2.43683	0.958806	Competition	Control	P06733	2.90665e+06	2.9749e+06	2.80246e+06	6.45114e+06	5.26687e+06	8.69057e+06	1.0576e+07	1.28784e+07	1.38904e+07	1.10426e+07	1.32413e+07	9.26498e+06	7.32518e+06	1.06267e+07	7.42816e+06	8.48847e+06	3.11685e+06	6.2016e+06	2.35398e+06	3.787e+06	2.13798e+06	8.50542e+06	4.94513e+06	1.50702e+07	1.30808e+07	2.63585e+07	2.27517e+07	3.47971e+07	2.06928e+07	2.40595e+07	6.53283e+06	2.04151e+07	7.42816e+06	1.43382e+07	3.25914e+06	1.1757e+07
P62937|PPIA_HUMAN;C9J5S7|C9J5S7_HUMAN;Q9Y536|PAL4A_HUMAN;A0A075B759|PAL4E_HUMAN;E5RIZ5|E5RIZ5_HUMAN	7	7	391.4	0.00173889	0.00134059	3.39374	0.958712	Competition	Control	P62937	724965	674802	704784	556898	729245	441051	2.28823e+06	1.19614e+06	2.03143e+06	2.22108e+06	3.99008e+06	1.27697e+06	2.03113e+06	736084	1.74259e+06	407288	1.32616e+06	773954	587119	859013	537674	734235	684697	764819	2.83017e+06	2.44817e+06	3.32738e+06	6.99902e+06	6.23547e+06	3.31606e+06	1.81143e+06	1.4141e+06	1.74259e+06	687965	1.3867e+06	1.46726e+06
H0Y2P0|H0Y2P0_HUMAN;H0YE40|H0YE40_HUMAN;E9PKC6|E9PKC6_HUMAN;J3KN83|J3KN83_HUMAN	4	4	210.44	0.00181888	0.00139429	10.4196	0.956875	Competition	Control	H0Y2P0	38834.9	12981.5	5402.36	11550.9	24436.3	74008.6	206515	25435.3	286168	398041	354363	471794	245316	382068	164164	26747.9	115683	97753.3	31450.8	16525.3	4121.42	15229.1	22943.5	128337	255425	52058.9	468727	1.2543e+06	553779	1.22516e+06	218781	733994	164164	45181	120964	185320
Q10589|BST2_HUMAN	3	3	250.52	0.00182014	0.00139429	17.162	0.956847	Competition	Control	Q10589	56236.5	51862.1	47035.6	87144.7	50030.7	110481	251655	227427	2.1566e+06	3.13861e+06	890198	248188	529015	3.34793e+06	307654	627511	121664	188273	45543.6	66019.7	35883.1	114895	46974.5	191582	311257	465478	3.53239e+06	9.89034e+06	1.39115e+06	644500	471793	6.43174e+06	307654	1.05995e+06	127218	356927
Q92973|TNPO1_HUMAN;S4R398|S4R398_HUMAN;E7EW37|E7EW37_HUMAN;O14787|TNPO2_HUMAN	5	5	250.84	0.00186327	0.0014228	52.599	0.955864	Competition	Control	Q92973	6454.51	4092.35	2079.27	12094.4	10572.3	12461.6	109662	5869.01	538867	655822	452571	749046	81060.4	43990.1	66418.8	16496.7	3653.93	54237.1	5227.24	5209.51	1586.26	15945.7	9926.48	21609.4	135635	12012.2	882634	2.06662e+06	707253	1.94514e+06	72292.3	84509.8	66418.8	27865.2	3820.74	102822
P26373|RL13_HUMAN;J3QSB4|J3QSB4_HUMAN;H3BTH3|H3BTH3_HUMAN;H3BUK8|H3BUK8_HUMAN	9	8	470.06	0.00187314	0.00142581	1.50442	0.95564	Control	Competition	P26373	1.72447e+07	1.51384e+07	2.02951e+07	1.91443e+07	1.78581e+07	1.38166e+07	1.52519e+07	1.0269e+07	9.4836e+06	1.26013e+07	1.12847e+07	9.90486e+06	1.92781e+07	2.27971e+07	1.78236e+07	1.40472e+07	1.25889e+07	1.5925e+07	1.39658e+07	1.9271e+07	1.54829e+07	2.52406e+07	1.67672e+07	2.39591e+07	1.88641e+07	2.10178e+07	1.55336e+07	3.9709e+07	1.76351e+07	2.57211e+07	1.71929e+07	4.37958e+07	1.78236e+07	2.37277e+07	1.31635e+07	3.01905e+07
P09382|LEG1_HUMAN	6	6	411.52	0.00188537	0.00143059	5.30507	0.955363	Competition	Control	P09382	375471	282208	322081	236910	302615	262763	1.15113e+06	934320	1.32299e+06	995509	1.68172e+06	3.36823e+06	739238	1.42726e+06	806877	90349.4	637751	672349	304079	359247	245713	312351	284129	455653	1.42376e+06	1.91229e+06	2.16699e+06	3.13703e+06	2.62809e+06	8.74667e+06	659276	2.74192e+06	806877	152613	666864	1.27464e+06
Q8WVM8|SCFD1_HUMAN	3	2	148.09	0.00189134	0.00143061	3.15584	0.955228	Competition	Probe	Q8WVM8	96733.5	86402.4	67686.9	32756.8	72781.1	34634.9	60245.8	157132	269092	185416	165125	287493	76630.3	72496.5	80308.9	30476.9	59002.6	37409.7	78340.5	109989	51637.8	43187.7	68335.2	60059.8	74514.4	321605	440758	584279	258047	746566	68341.4	139274	80308.9	51479.7	61696.1	70921.1
P41091|IF2G_HUMAN;Q2VIR3|IF2GL_HUMAN;H7BZU1|H7BZU1_HUMAN	6	6	217.44	0.00193246	0.00145713	10.4756	0.9543	Competition	Control	P41091	42309.5	28010.7	36467.6	7817.71	33751.6	117303	349728	58163.5	697944	478349	826436	372317	81311	237034	175739	191708	48549.8	18744	34264.8	35657.2	27820.8	10307.2	31689.8	203413	432558	119044	1.14319e+06	1.50736e+06	1.29151e+06	966839	72515.8	455367	175739	323822	50766.1	35534.8
P42285|MTREX_HUMAN;H0YAC4|H0YAC4_HUMAN	2	2	65.64	0.00194386	0.00146115	3.07612	0.954044	Control	Competition	P42285	3.23785e+06	1.89597e+06	952237	1.02792e+06	959222	898245	514130	724527	536973	291865	444645	404344	787827	541024	818905	892428	1.55343e+06	1.34003e+06	2.6222e+06	2.41355e+06	726454	1.35525e+06	900626	1.55763e+06	635896	1.4829e+06	879532	919718	694865	1.05001e+06	702610	1.03937e+06	818905	1.50744e+06	1.62434e+06	2.54041e+06
E9PC52|E9PC52_HUMAN;Q5JP01|Q5JP01_HUMAN;H0YCT5|H0YCT5_HUMAN;Q5JNZ6|Q5JNZ6_HUMAN	4	3	112.75	0.00200095	0.00149937	11.4849	0.952766	Competition	Control	E9PC52	5942.43	1909.68	12799.5	3480.19	9502.76	8274.07	35884.7	57203.9	82960.3	208947	88108.1	8211.65	42525.5	21778.5	29823	6654.44	12562.9	6209.34	4812.53	2431	9764.67	4588.41	8922.26	14347.9	44383.6	117080	135884	658431	137690	21324.2	37925.6	41838.9	29823	11240.3	13136.4	11771.6
O60763|USO1_HUMAN	3	3	87.25	0.00205509	0.00153516	6.10567	0.951562	Competition	Control	O60763	10048.8	11855.6	8098.47	9648.85	11252.9	28961.6	19387	150909	123063	124047	22224.8	48005.7	18970.4	45785.8	8991.34	12434	16879.9	12471.6	8138.1	15092	6178.26	12721.4	10565.5	50221.9	23978.6	308868	201571	390894	34731.6	124662	16918.4	87959.6	8991.34	21002.7	17650.5	23643.6
H3BRG4|H3BRG4_HUMAN;H3BP04|H3BP04_HUMAN;H3BUE4|H3BUE4_HUMAN;A0A087WVZ4|A0A087WVZ4_HUMAN	4	4	271.08	0.00206343	0.00153662	5.91189	0.951378	Competition	Control	H3BRG4	76261.1	23741.9	55186	27056.4	27064.9	40557.6	186152	29048	325164	296103	308314	332411	95412.3	28585.8	81894	78218	41237.6	38693.3	61760.7	30223.1	42101	35672.1	25411.6	70330.2	230240	59453	532601	933074	481816	863210	85091.8	54916.5	81894	132121	43120.1	73354.5
P05165|PCCA_HUMAN;A0A1B0GU58|A0A1B0GU58_HUMAN;A0A1B0GUX9|A0A1B0GUX9_HUMAN;A0A1B0GWI4|A0A1B0GWI4_HUMAN;A0A1B0GWA1|A0A1B0GWA1_HUMAN;A0A1B0GTR1|A0A1B0GTR1_HUMAN;Q5JTW6|Q5JTW6_HUMAN;H0Y4B9|H0Y4B9_HUMAN;H0Y5U0|H0Y5U0_HUMAN;H0Y798|H0Y798_HUMAN;Q5JVH2|Q5JVH2_HUMAN	20	20	1106.11	0.0020892	0.00154701	3.07444	0.950808	Control	Competition	P05165	2.64423e+06	1.65503e+06	3.70273e+06	2.685e+06	2.00643e+06	905586	819616	956313	692944	478349	983436	492577	1.69911e+06	635159	2.17011e+06	981128	1.76574e+06	1.59833e+06	2.14145e+06	2.10683e+06	2.82478e+06	3.54e+06	1.88386e+06	1.57036e+06	1.01373e+06	1.9573e+06	1.13501e+06	1.50736e+06	1.53686e+06	1.27913e+06	1.51532e+06	1.22021e+06	2.17011e+06	1.65726e+06	1.84635e+06	3.03011e+06
A0A0C4DG17|A0A0C4DG17_HUMAN	3	3	226.98	0.00209025	0.00154701	7.83437	0.950785	Competition	Control	A0A0C4DG17	72694	16325.7	54520.6	23395.1	40972.4	39546.1	340488	314353	403964	125218	526738	227886	275002	12122.4	248909	16258.6	40417	44160.6	58871.9	20782.4	41593.4	30845	38469.6	68576.1	421129	643391	661670	394584	823156	591778	245255	23288.4	248909	27463	42262	83719.3
P09914|IFIT1_HUMAN	10	10	718.97	0.00209865	0.00154846	5.75885	0.9506	Competition	Control	P09914	98089.4	104574	93420.9	109190	89352.3	52364.1	236331	431937	671535	486674	867840	455723	356108	20549.1	253220	312306	104603	210967	79438.6	133122	71270.1	143961	83894	90803.6	292303	884052	1.09994e+06	1.5336e+06	1.35621e+06	1.18343e+06	317588	39477.1	253220	527529	109378	399950
O14879|IFIT3_HUMAN	8	8	569.66	0.00210933	0.00155159	9.26908	0.950365	Competition	Control	O14879	127297	101972	75531.2	73447.3	133465	94228.1	1.54132e+06	86870.6	1.19099e+06	403816	1.69085e+06	702661	709286	215888	546363	160658	178262	285538	103092	129809	57622.1	96835.6	125312	163399	1.90636e+06	177800	1.95078e+06	1.2725e+06	2.64237e+06	1.82468e+06	632564	414744	546363	271373	186399	541320
B1AN99|B1AN99_HUMAN	1	1	62.74	0.00220968	0.00161914	2.19926	0.948172	Control	Competition	B1AN99	5.40504e+06	6.75203e+06	4.14881e+06	6.15987e+06	4.25738e+06	1.35103e+07	2.97722e+06	3.62512e+06	2.54566e+06	2.831e+06	2.817e+06	3.49808e+06	5.13573e+06	7.05725e+06	3.76816e+06	6.19494e+06	4.76194e+06	8.26167e+06	4.37732e+06	8.59524e+06	3.1651e+06	8.12139e+06	3.99731e+06	2.34281e+07	3.68235e+06	7.41959e+06	4.16965e+06	8.92098e+06	4.40225e+06	9.08387e+06	4.58021e+06	1.35577e+07	3.76816e+06	1.04641e+07	4.97932e+06	1.56624e+07
A0A0A0MTI1|A0A0A0MTI1_HUMAN;H7C4B7|H7C4B7_HUMAN	2	2	107.15	0.00221463	0.00161914	19.6693	0.948064	Probe	Control	A0A0A0MTI1	16481.1	10600.3	6998.42	4227.46	5281.45	4822.26	99387.8	1958.03	102940	112099	307888	158875	280009	90941.2	309359	158527	29434.6	83940.9	13347.4	13494	5339.04	5573.64	4958.83	8362.2	122927	4007.54	168610	353244	481151	412569	249721	174708	309359	267775	30778.3	159134
H7C1D4|H7C1D4_HUMAN;A0A0J9YVW2|A0A0J9YVW2_HUMAN	2	2	147.06	0.00222323	0.0016205	5.53715	0.947877	Competition	Control	H7C1D4	34495.8	11181.4	56856.9	27478.5	17423.4	12381.1	174257	106493	130230	73413.5	320812	79725.3	55076.8	26330.6	40097.1	6069.71	93966.1	10485.8	27936.8	14233.7	43375.7	36228.7	16359	21469.9	215528	217962	213309	231339	501348	207032	49119.3	50583.9	40097.1	10252.6	98255.6	19879
P68036|UB2L3_HUMAN;A0A1B0GUS4|UB2L5_HUMAN	3	3	76.63	0.00225703	0.00164017	2.47382	0.947146	Control	Competition	P68036	3.00291e+06	4.66226e+06	2.77482e+06	3.67e+06	3.91654e+06	4.00697e+06	2.2036e+06	848600	1.47859e+06	1.71533e+06	1.23838e+06	1.42218e+06	3.00649e+06	614817	1.69482e+06	2.05022e+06	2.62921e+06	1.20278e+06	2.43194e+06	5.93499e+06	2.11689e+06	4.83867e+06	3.67729e+06	6.94842e+06	2.72549e+06	1.73684e+06	2.42185e+06	5.40533e+06	1.93527e+06	3.69314e+06	2.68128e+06	1.18113e+06	1.69482e+06	3.4631e+06	2.74923e+06	2.28023e+06
Q06323|PSME1_HUMAN;H0YKK6|H0YKK6_HUMAN;H0YLU2|H0YLU2_HUMAN	6	5	214.15	0.00234474	0.00169878	4.6685	0.945263	Competition	Control	Q06323	43310.5	73341.8	34709.4	51696.5	43873.8	27835.4	160943	50437.1	153797	228541	158161	530873	149682	400957	133344	92378.5	104315	80146.3	35075.4	93363.1	26479.5	68158.5	41193.7	48268.8	199060	103231	251910	720173	247165	1.37858e+06	133491	770281	133344	156040	109077	151941
M0R210|M0R210_HUMAN;M0R3H0|M0R3H0_HUMAN;M0QX76|M0QX76_HUMAN;Q6IPX4|Q6IPX4_HUMAN	7	7	316.39	0.00236226	0.00170633	6.08442	0.944889	Competition	Control	M0R210	111975	184019	82883.7	556345	124468	128637	976079	802720	1.43228e+06	1.80271e+06	1.13951e+06	1.07697e+06	556776	559856	330470	23536	209489	626725	90684	234254	63231.3	733505	116865	223067	1.20725e+06	1.64294e+06	2.346e+06	5.68067e+06	1.78077e+06	2.7967e+06	496551	1.07554e+06	330470	39755.6	219052	1.18814e+06
O00232|PSD12_HUMAN	3	3	100.15	0.0023808	0.00170983	6.59382	0.944495	Competition	Control	O00232	13179.7	12733	17304.1	6188.8	14028.4	59313.4	118325	31926	301424	134860	191306	31532.1	46123.5	42896.2	42983	55012.4	53533	15811.2	10673.7	16209	13201.2	8159.55	13171.4	102854	146349	65343.5	493716	424969	298963	81883.2	41134.5	82408.2	42983	92923.6	55976.8	29974.8
Q02750|MP2K1_HUMAN	1	1	62.45	0.00238132	0.00170983	25.1997	0.944484	Competition	Control	Q02750	16147.9	4023.83	5905.19	5376.76	1832.73	4906.12	15162.2	691599	50740.2	86215.3	45592.3	73130.4	44686.6	1252.66	5391.47	1504.52	2145.2	28458.9	13077.6	5122.28	4505.02	7088.91	1720.78	8507.61	18753.2	1.41551e+06	83109.7	271680	71249.1	189906	39852.9	2406.49	5391.47	2541.34	2243.13	53952.1
P16615|AT2A2_HUMAN;H7C5W9|H7C5W9_HUMAN;O14983|AT2A1_HUMAN;Q93084|AT2A3_HUMAN;A0A0C4DH86|A0A0C4DH86_HUMAN;H3BTW4|H3BTW4_HUMAN;J3QSY6|J3QSY6_HUMAN	23	21	1355.25	0.00244002	0.00174676	2.61554	0.943241	Competition	Control	P16615	668859	962238	433961	801937	502922	912946	842288	2.34101e+06	1.3881e+06	2.29855e+06	1.67298e+06	2.65909e+06	1.24083e+06	2.30785e+06	802057	1.26819e+06	855729	1.34681e+06	541681	1.22492e+06	331066	1.0573e+06	472200	1.58312e+06	1.04177e+06	4.79138e+06	2.27363e+06	7.24315e+06	2.61443e+06	6.90518e+06	1.10661e+06	4.43363e+06	802057	2.14214e+06	894794	2.55328e+06
A0A087X054|A0A087X054_HUMAN;A0A087WWI4|A0A087WWI4_HUMAN;A0A087WW13|A0A087WW13_HUMAN	6	6	243.58	0.00247102	0.0017637	5.8714	0.942588	Competition	Control	A0A087X054	43603.2	39646.5	30086.9	81980.3	49931.1	40744.4	59698.1	78874	436235	514603	232567	357199	152827	39869.5	67104.8	22556.9	71449.7	35985.2	35312.5	50469.4	22953.1	108086	46881	70654.1	73836.9	161433	714529	1.62161e+06	363442	927582	136296	76593.6	67104.8	38101.8	74711.4	68220.6
Q9Y4K0|LOXL2_HUMAN;E5RFY0|E5RFY0_HUMAN;H0YAR1|H0YAR1_HUMAN;E5RI22|E5RI22_HUMAN;H0YAP6|H0YAP6_HUMAN	10	10	500.6	0.00249926	0.00177858	28.8234	0.941995	Competition	Probe	Q9Y4K0	13105.1	19974.6	46617.1	3947.68	17371.4	24208.1	47841.2	17565	245388	52503.7	822913	899671	23508.7	7430.05	4184.7	10962.9	23499.9	2781.55	10613.3	25427.4	35563.8	5204.76	16310.2	41978.9	59171.8	35950.5	401933	165449	1.286e+06	2.33628e+06	20965.8	14273.9	4184.7	18517.8	24572.7	5273.24
A0A1W2PR46|A0A1W2PR46_HUMAN;B4DIR1|B4DIR1_HUMAN	2	1	135.83	0.00257585	0.00182768	2.97854	0.940398	Control	Competition	A0A1W2PR46	617193	509039	247450	495058	298618	329947	162810	148707	46220.7	148107	95649.3	236939	149020	103875	269622	307878	306204	282810	499839	647999	188778	652703	280376	572155	201370	304361	75707	466711	149475	615287	132901	199555	269622	520049	320182	536149
Q5URX0|Q5URX0_HUMAN;H0YA83|H0YA83_HUMAN;H0Y9B6|H0Y9B6_HUMAN	3	3	101.99	0.00259083	0.00183124	14.964	0.940087	Competition	Control	Q5URX0	2038.91	2934.44	1279.73	5789.98	614.951	1155.24	5395.57	8598.18	77665.3	1088.92	95661.4	18292.2	32496.7	15579.3	47000.2	49074.9	11045.4	21692.3	1651.23	3735.51	976.294	7633.73	577.385	2003.28	6673.44	17598	127212	3431.38	149494	47501.5	28981.6	29929.6	47000.2	82894.4	11549.6	41124.1
F5GWZ1|F5GWZ1_HUMAN	1	1	57.94	0.0025961	0.00183124	11.2112	0.939978	Competition	Probe	F5GWZ1	14824.7	4447.28	5747.36	802.302	8933.13	625.489	14691.2	2184.49	77298.9	66853.8	95501	54272.4	25945.6	86.1557	1128.23	132.99	57.8501	371.683	12005.9	5661.32	4384.62	1057.78	8387.44	1084.65	18170.7	4471.03	126611	210668	149244	140936	23139.1	165.514	1128.23	224.639	60.491	704.635
P15924|DESP_HUMAN	14	12	465.7	0.00269826	0.00189774	1.69037	0.937875	Control	Competition	P15924	383194	488823	316533	540260	406049	389899	349206	231307	259304	163847	219127	270822	457659	462737	267214	372610	369593	279720	310333	622265	241481	712299	381245	676118	431911	473420	424726	516311	342440	703276	408155	888967	267214	629390	386465	530292
P30519|HMOX2_HUMAN;A0A087WT44|A0A087WT44_HUMAN;I3L159|I3L159_HUMAN;A0A1B0GXH0|A0A1B0GXH0_HUMAN	4	4	246.6	0.00271448	0.00190153	48.9671	0.937544	Competition	Control	P30519	2455.35	2807.41	1003.69	21494.5	2934.9	8964.68	9568.94	31287.4	69109.9	914572	329001	588522	70271.9	59467.1	8580.15	44561.8	3552.45	9185.32	1988.48	3573.8	765.708	28339.2	2755.62	15545.5	11835.2	64036.5	113198	2.88198e+06	514144	1.52828e+06	62670.8	114243	8580.15	75271.1	3714.62	17413.5
A0A087WUV8|A0A087WUV8_HUMAN;A0A087X2B5|A0A087X2B5_HUMAN;I3L192|I3L192_HUMAN	4	4	268.23	0.00271946	0.00190153	6.44192	0.937442	Competition	Probe	A0A087WUV8	70831.5	19321.7	59040.3	12910.1	91778	27111.7	123223	36559.2	513348	303737	457273	272001	77598.4	36410.5	58501.4	13558	37769.8	41011.6	57363.5	24596.3	45041.4	17021.1	86171.5	47013.9	152407	74826.3	840836	957132	714600	706337	69204.8	69948.6	58501.4	22901.3	39494	77749.6
H7C0V9|H7C0V9_HUMAN	1	1	65.86	0.00281308	0.00196129	55.2147	0.935543	Probe	Control	H7C0V9	3766.5	4126.32	938.645	1665.01	1691.04	271.759	11552.5	9461.75	92474.4	12461.1	23496.5	377.446	224913	88523.5	191955	2295.02	97099.7	83148.6	3050.33	5252.74	716.085	2195.22	1587.74	471.253	14288.6	19365.5	151468	39267	36718.9	980.159	200585	170063	191955	3876.61	101532	157633
P31689|DNJA1_HUMAN	4	4	151.9	0.00282159	0.00196154	2.12388	0.935371	Competition	Control	P31689	521381	348767	467036	347578	427893	182438	669235	711383	819500	891463	1.00692e+06	775996	604823	228544	712160	493186	518898	602270	422245	443976	356298	458260	401754	316362	827736	1.456e+06	1.3423e+06	2.80916e+06	1.57356e+06	2.01512e+06	539401	439058	712160	833060	542586	1.14178e+06
P06748|NPM_HUMAN;E5RI98|E5RI98_HUMAN;A0A087WTA1|A0A087WTA1_HUMAN;E5RGW4|E5RGW4_HUMAN	6	6	411.07	0.00287523	0.00199307	2.59075	0.934293	Competition	Control	P06748	555495	510877	573273	536540	509304	410478	1.12394e+06	396290	1.66102e+06	1.44448e+06	1.68567e+06	1.7095e+06	897193	962462	793695	730354	571225	703463	449873	650339	437345	707395	478192	711804	1.39013e+06	811093	2.72066e+06	4.55182e+06	2.63427e+06	4.43925e+06	800146	1.84899e+06	793695	1.23367e+06	597301	1.33362e+06
Q14195|DPYL3_HUMAN;H0YBT4|H0YBT4_HUMAN;E9PD68|E9PD68_HUMAN	5	3	250.31	0.00288704	0.00199551	8.23287	0.934056	Competition	Control	Q14195	28063.2	6531.05	41466.7	36546.2	17731.4	11100.3	199004	47829.9	454452	42620.9	323047	97494.1	90332	49287.5	66292.7	14533.9	34917.3	51480.9	22727.2	8313.94	31634.7	48183.8	16648.2	19248.9	246136	97894.2	744368	134306	504839	253175	80561	94686.6	66292.7	24549.7	36511.2	97597.1
P40227|TCPZ_HUMAN;Q92526|TCPW_HUMAN	3	3	110.95	0.0029322	0.00202091	12.8437	0.933155	Competition	Control	P40227	21370.8	6099.9	13310.7	21735	35422.6	3385.43	197033	28374.5	330414	55152.8	320914	369492	83715.8	4335.07	82193.2	23713.8	50874	26736.7	17307.3	7765.09	10154.6	28656.2	33258.8	5870.61	243698	58074.5	541200	173797	501507	959504	74660.5	8328.14	82193.2	40055.9	53196.4	50687.2
A0A499FI48|A0A499FI48_HUMAN	4	4	235.51	0.00295654	0.00203186	13.2199	0.932671	Competition	Control	A0A499FI48	8378.62	9358.71	11276.8	15179.7	10444.9	13314.8	35128.4	12360.3	154682	273200	326663	96303.6	16390.3	49640.3	32284.7	34516.4	4514.24	23964.3	6785.5	11913.5	8602.95	20013.5	9806.85	23089	43448.2	25298	253361	860904	510490	250083	14617.4	95364.5	32284.7	58303	4720.32	45431.4
A0A3B3IS84|A0A3B3IS84_HUMAN;A0A3B3IT15|A0A3B3IT15_HUMAN;A0A3B3ISK1|A0A3B3ISK1_HUMAN;A0A3B3ITV3|A0A3B3ITV3_HUMAN;A0A3B3ITI7|A0A3B3ITI7_HUMAN;A0A3B3IU89|A0A3B3IU89_HUMAN;A0A3B3IU78|A0A3B3IU78_HUMAN	9	9	301.92	0.00306434	0.00209995	2.31162	0.930544	Competition	Control	A0A3B3IS84	89606.2	186361	90404.3	58436.4	91353.5	76735.3	252821	148600	175702	146696	346863	299869	111495	94558.1	167945	113323	199354	165409	72568.4	237235	68968.7	77044.7	85773	133065	312699	304142	287791	462266	542059	778705	99435.2	181657	167945	191418	208455	313581
P22626|ROA2_HUMAN;A0A087WUI2|A0A087WUI2_HUMAN	9	7	569.26	0.00309614	0.00211289	3.01478	0.929922	Competition	Control	P22626	639700	636078	601654	592922	667510	873790	1.73042e+06	551992	2.04028e+06	3.18766e+06	2.8838e+06	1.70012e+06	1.20322e+06	438935	912101	1.05192e+06	734284	950025	518067	809719	458997	781730	626734	1.51522e+06	2.14025e+06	1.12977e+06	3.34187e+06	1.00449e+07	4.50665e+06	4.4149e+06	1.07307e+06	843242	912101	1.77684e+06	767804	1.80105e+06
E9PI39|E9PI39_HUMAN;H0YCK7|H0YCK7_HUMAN;E9PK06|E9PK06_HUMAN;E9PL71|E9PL71_HUMAN;E9PKK3|E9PKK3_HUMAN;E9PJD0|E9PJD0_HUMAN	6	4	312.9	0.00310661	0.00211289	5.59499	0.929718	Competition	Control	E9PI39	49941	20167.7	15393.2	55616.5	124713	110706	318382	144925	368895	331565	516095	426857	94376.3	248324	80431	8207.42	60714.2	89180.7	40445.2	25673.1	11743.4	73326.8	117094	191973	393787	296620	604230	1.04482e+06	806525	1.10847e+06	84167.9	477057	80431	13863.5	63485.8	169068
A0AVL1|A0AVL1_HUMAN	4	4	171.27	0.00310958	0.00211289	18.411	0.92966	Competition	Control	A0AVL1	11059.1	6214.02	9236.36	4540.63	4573.9	813.632	36508.4	7600.59	131407	353956	81733.5	59646.2	68687.8	53511.1	7783.86	65182.9	8201.9	17108.4	8956.27	7910.36	7046.35	5986.54	4294.5	1410.9	45155.1	15556.3	215238	1.11538e+06	127729	154890	61258	102801	7783.86	110103	8576.31	32434
H0Y5J4|H0Y5J4_HUMAN;B4DDD6|B4DDD6_HUMAN	2	2	74.9	0.00312855	0.00211979	2.90686	0.92929	Competition	Control	H0Y5J4	12010.2	5552.89	17304	19545.9	10270.2	4926.55	17863.5	48216.5	29735.9	40902.7	38696.7	26930.3	16854.8	7091.15	16155.3	19985	16077.2	31224.1	9726.53	7068.74	13201.1	25770	9642.84	8543.05	22094.2	98685.5	48705.8	128892	60472.9	69933.1	15031.7	13622.9	16155.3	33757.4	16811.1	59194.4
P60981|DEST_HUMAN;F6RFD5|F6RFD5_HUMAN	3	3	184.58	0.00315173	0.00212575	2.31395	0.928839	Competition	Control	P60981	64741.2	84931.8	55047.2	36774.4	46528.8	15782.2	105030	78924.9	106890	139421	123584	149139	92029.8	78435.4	77218.7	50283.6	110110	91143.6	52431.2	108117	41995.1	48484.7	43686.5	27367.7	129906	161537	175080	439341	193130	387288	82075.2	150683	77218.7	84936.1	115137	172789
Q8TCS8|PNPT1_HUMAN;H7BXF6|H7BXF6_HUMAN	4	4	225.04	0.00315502	0.00212575	4.40645	0.928775	Competition	Control	Q8TCS8	32974.2	13784.9	16110.7	46562.4	4809.36	15074.2	85019.5	35446.8	165454	81395.9	168692	33816.1	55086.8	10170.1	20322.6	19654.7	20101.7	9841.88	26704.5	17548	12290.7	61389.6	4515.57	26140	105155	72549.5	271004	256493	263622	87814.3	49128.2	19537.9	20322.6	33199.4	21019.4	18658.2
P55884|EIF3B_HUMAN	1	1	52.72	0.00319062	0.00213862	22.456	0.928086	Competition	Control	P55884	58.14	965.232	894.077	1001.9	3619.67	2903.62	22180.2	2562.22	53917.6	58562.4	5384.54	69436.6	10366.6	23539.7	3692.65	16499.5	1251.8	13534.4	47.0852	1228.73	682.084	1320.94	3398.56	5035.12	27433.3	5244.14	88314.1	184541	8414.65	180314	9245.23	45222.4	3692.65	27870	1308.94	25658.4
J3KTF8|J3KTF8_HUMAN;J3KRE2|J3KRE2_HUMAN;J3KRY1|J3KRY1_HUMAN	4	4	194.13	0.0031919	0.00213862	6.59187	0.928061	Competition	Control	J3KTF8	90300.7	52115	117234	77828.5	72123.6	72322.9	433020	442215	480963	836032	928625	55932.6	356615	83678.6	374254	189578	199366	185261	73130.9	66341.6	89437.2	102612	67717.8	125414	535576	905088	787791	2.63449e+06	1.4512e+06	145247	318040	160756	374254	320224	208467	351217
P31946|1433B_HUMAN;A0A0J9YWE8|A0A0J9YWE8_HUMAN;A0A0J9YWZ2|A0A0J9YWZ2_HUMAN	6	3	365.45	0.00325176	0.00217268	6.07807	0.926908	Competition	Control	P31946	69848.2	30063.1	74172.1	107580	65451.2	91999.6	253428	339940	872503	203517	933228	66350.9	382812	206275	261627	112580	222995	214713	56567.2	38269.9	56585.3	141838	61453	159535	313450	695762	1.42911e+06	641320	1.4584e+06	172301	341404	396278	261627	190163	233174	407052
P34897|GLYM_HUMAN;H0YIZ0|H0YIZ0_HUMAN;G3V241|G3V241_HUMAN;G3V2Y4|G3V2Y4_HUMAN	7	7	290.43	0.00326816	0.00217758	2.55109	0.926593	Competition	Control	P34897	110370	87123.3	128292	98932.2	137526	140144	344179	158896	341141	283093	489113	175436	259557	123701	213789	70281.9	101880	94464	89384.3	110907	97873.1	130436	129125	243021	425694	325214	558770	892078	764357	455576	231482	237642	213789	118716	106531	179084
P50991|TCPD_HUMAN	8	8	483	0.00332762	0.00220828	3.73064	0.925457	Competition	Control	P50991	163274	93333	95737	142209	224495	148859	561590	620860	480257	180672	844475	549989	415745	137794	401057	75516.2	310685	309371	132229	118812	73037	187493	210782	258133	694596	1.27072e+06	786635	569329	1.3197e+06	1.42822e+06	370775	264718	401057	127557	324868	586503
P17844|DDX5_HUMAN;J3KRZ1|J3KRZ1_HUMAN;J3QSF1|J3QSF1_HUMAN;J3QRQ7|J3QRQ7_HUMAN;A0A0U1RQJ0|A0A0U1RQJ0_HUMAN;J3KRX8|J3KRX8_HUMAN	12	7	422.11	0.00333259	0.00220828	2.57656	0.925362	Probe	Competition	P17844	2.79975e+08	2.99181e+08	1.56236e+08	2.00181e+08	2.19581e+08	3.57776e+08	1.25548e+08	1.62415e+08	1.34303e+08	1.69664e+08	1.57945e+08	1.94868e+08	2.99124e+08	4.55778e+08	1.82249e+08	2.443e+08	5.66669e+08	6.86068e+08	2.2674e+08	3.80854e+08	1.19191e+08	2.63926e+08	2.06167e+08	6.20413e+08	1.55282e+08	3.32418e+08	2.19982e+08	5.34642e+08	2.46827e+08	5.06036e+08	2.66768e+08	8.75599e+08	1.82249e+08	4.12657e+08	5.92537e+08	1.30064e+09
P35606|COPB2_HUMAN;D6R997|D6R997_HUMAN;D6RBG7|D6RBG7_HUMAN;H0Y938|H0Y938_HUMAN;H0YAC7|H0YAC7_HUMAN	9	8	290.69	0.0033989	0.00223881	6.8684	0.924105	Competition	Control	P35606	19637.2	21284.7	21780.3	5923.41	37318.5	6550.44	174286	67040	66523.6	107743	254736	102329	58121.4	64494.5	55339.4	3005.97	42529.3	32722.8	15903.4	27095.1	16616	7809.64	35038.9	11359	215564	137212	108962	339516	398087	265730	51834.6	123901	55339.4	5077.5	44470.7	62035.7
Q9BUF5|TBB6_HUMAN;K7ESM5|K7ESM5_HUMAN;K7EL29|K7EL29_HUMAN;K7EJ64|K7EJ64_HUMAN;K7ES63|K7ES63_HUMAN	16	5	962.07	0.00341082	0.00223881	7.0153	0.923879	Competition	Control	Q9BUF5	118716	29456.5	116802	39769.8	137744	118043	639069	189476	950570	745028	1.05039e+06	357760	223697	2.10465e+06	355180	82747.6	225154	163834	96143.2	37497.7	89107.1	52434	129330	204697	790426	387804	1.55698e+06	2.34772e+06	1.64149e+06	929037	199500	4.04327e+06	355180	139772	235432	310595
P17987|TCPA_HUMAN;E7ERF2|E7ERF2_HUMAN;E7EQR6|E7EQR6_HUMAN;F5H136|F5H136_HUMAN;F5H282|F5H282_HUMAN;F5H676|F5H676_HUMAN;F5H726|F5H726_HUMAN;F5GZI8|F5GZI8_HUMAN;F5H7Y1|F5H7Y1_HUMAN;F5GZ03|F5GZ03_HUMAN	13	13	511.9	0.00341252	0.00223881	5.3225	0.923847	Competition	Control	P17987	192521	150172	178036	121341	240274	140083	978659	974381	1.16359e+06	118528	1.20816e+06	998557	375896	292395	392854	60232.6	193351	154286	155915	191167	135822	159981	225596	242916	1.21044e+06	1.99428e+06	1.90589e+06	373503	1.88804e+06	2.59307e+06	335236	561723	392854	101741	202177	292494
A6NKB8|A6NKB8_HUMAN;A0A087WU27|A0A087WU27_HUMAN;C9JMZ3|C9JMZ3_HUMAN	2	2	84.43	0.00341589	0.00223881	15.2462	0.923784	Competition	Control	A6NKB8	11648.5	4776.41	7718.39	14498	4881.34	7667.82	118403	5350.37	47995.6	140017	272903	195789	56512.5	4041.57	10319	5922.65	13989.3	18795.5	9433.61	6080.3	5888.3	19114.6	4583.16	13296.6	146445	10950.7	78614.2	441219	426477	508429	50399.7	7764.29	10319	10004.2	14627.9	35632.3
P54578|UBP14_HUMAN;A6NJA2|A6NJA2_HUMAN;J3KS55|J3KS55_HUMAN	3	3	120.87	0.00342867	0.00224108	103.396	0.923543	Competition	Control	P54578	2285.67	1876.95	1938.1	2527.48	3125.61	0	144166	6892.7	288755	252822	198009	324656	136818	23413.6	38364.4	3120.9	4338.64	18373	1851.07	2389.33	1478.56	3332.33	2934.68	0	178311	14107.4	472965	796688	309437	843073	122019	44980.2	38364.4	5271.63	4536.7	34831.4
P36542|ATPG_HUMAN	4	4	113.54	0.00345745	0.00225377	3.76773	0.923001	Competition	Control	P36542	83868	61667.6	41072.6	76103	63542.6	16371.9	186627	101028	266774	227742	258038	250712	236556	30151.7	152052	64169.1	77674.2	45394.9	67921.3	78502	31334	100337	59661	28390.3	230828	206776	436961	717655	403247	651053	210968	57924.7	152052	108390	81220	86059.3
P08779|K1C16_HUMAN;K7ENW6|K7ENW6_HUMAN	26	11	1831.1	0.00347178	0.00225699	1.84914	0.922733	Control	Competition	P08779	8.69344e+06	9.28985e+06	8.87102e+06	7.35542e+06	7.46732e+06	7.306e+06	5.76617e+06	5.26079e+06	3.29992e+06	4.67057e+06	3.36692e+06	4.1253e+06	7.42813e+06	1.25704e+07	5.55978e+06	3.8958e+06	5.52016e+06	6.61063e+06	7.04046e+06	1.18258e+07	6.76763e+06	9.69766e+06	7.01117e+06	1.26692e+07	7.13182e+06	1.07674e+07	5.40509e+06	1.47178e+07	5.26163e+06	1.07127e+07	6.62465e+06	2.4149e+07	5.55978e+06	6.58054e+06	5.77216e+06	1.25324e+07
H7BYN3|H7BYN3_HUMAN	2	2	59.66	0.00349305	0.00225949	2.31078	0.922334	Probe	Competition	H7BYN3	1.02518e+06	1.09432e+06	987251	1.72533e+06	1.24567e+06	903904	495095	539611	445749	316766	708840	778633	1.21879e+06	1.48591e+06	571221	684431	1.33353e+06	2.29631e+06	830254	1.39305e+06	753166	2.27474e+06	1.16957e+06	1.56744e+06	612352	1.10443e+06	730113	998189	1.10774e+06	2.02197e+06	1.08695e+06	2.8546e+06	571221	1.1561e+06	1.39441e+06	4.35333e+06
A0A087WTP3|A0A087WTP3_HUMAN;M0QYH3|M0QYH3_HUMAN;M0QXW7|M0QXW7_HUMAN;M0R0I5|M0R0I5_HUMAN	5	5	376.06	0.00349442	0.00225949	6.32802	0.922309	Competition	Control	A0A087WTP3	11598.9	51553.4	55063.3	72720.5	36800.2	90934.1	176725	74405.2	363887	655770	330589	415176	387806	147570	127430	51355.3	93594.4	42982.5	9393.47	65626.8	42007.4	95877.4	34552.2	157687	218581	152286	596026	2.06645e+06	516625	1.07814e+06	345858	283498	127430	86746.3	97867	81486
A0A1W2PQ51|A0A1W2PQ51_HUMAN	8	3	288.78	0.00352636	0.00226861	12.3622	0.921712	Competition	Control	A0A1W2PQ51	26395.4	4253.39	27329.4	4368.54	30896.9	11503.7	192000	9955.4	285658	200834	338472	267986	60117.4	16581.4	57460.5	32048.3	118371	99441.2	21376.5	5414.5	20849.4	5759.65	29009.5	19948.5	237473	20375.9	467891	632864	528945	695910	53614.6	31854.7	57460.5	54134	123774	188520
A0A087WSV8|A0A087WSV8_HUMAN;E9PKG6|E9PKG6_HUMAN;A0A2R8Y6G7|A0A2R8Y6G7_HUMAN;H0YEG8|H0YEG8_HUMAN	4	3	184	0.00352737	0.00226861	4.51512	0.921693	Competition	Probe	A0A087WSV8	69038.6	24743.6	73317	38535.7	60099.3	210691	224060	85069	414539	129731	545292	561994	65515.3	51734.4	59476.2	175018	48970.8	33533.9	55911.5	31498.3	55932.9	50806.9	56428	365356	277126	174112	678992	408805	852151	1.4594e+06	58428.7	99387.4	59476.2	295630	51206.3	63573.3
E9PGZ1|E9PGZ1_HUMAN	1	1	65.41	0.00356634	0.00228755	2.85299	0.920968	Competition	Control	E9PGZ1	74738.1	46937.5	60282	40706.2	67168.4	22162.1	100445	195413	185116	149882	136812	122448	238259	76247.8	239973	84961.9	155972	44760.1	60527.3	59750.8	45988.7	53668.5	63065.3	38430.9	124234	399956	303210	472307	213802	317974	212487	146480	239973	143513	163092	84855.8
Q96AG4|LRC59_HUMAN;I3L223|I3L223_HUMAN	8	8	419.87	0.00360781	0.00230664	4.72788	0.9202	Competition	Control	Q96AG4	477411	510682	386299	524870	422017	164456	1.57203e+06	2.24846e+06	1.33172e+06	463629	2.68192e+06	3.4545e+06	948145	872629	822537	186031	732772	1.1917e+06	386636	650092	294705	692008	396237	285181	1.94435e+06	4.60196e+06	2.18129e+06	1.46098e+06	4.19115e+06	8.9707e+06	845586	1.67641e+06	822537	314233	766223	2.25923e+06
A0A087X2G1|A0A087X2G1_HUMAN	3	3	69.66	0.00361528	0.00230664	6.35763	0.920062	Competition	Control	A0A087X2G1	15784.2	10269.8	26118.5	9873.95	15540.3	1610.54	87438.6	38757.2	102264	41656.2	112531	120860	52647.2	55075.2	44557.7	3931.09	16268.7	25193.8	12783	13073.3	19925.6	13018.2	14591	2792.82	108147	79324.9	167502	131266	175857	313852	46952.5	105805	44557.7	6640.15	17011.3	47762.2
O00148|DX39A_HUMAN;Q13838|DX39B_HUMAN;F6WLT2|F6WLT2_HUMAN;K7EPJ3|K7EPJ3_HUMAN;K7EQN7|K7EQN7_HUMAN;A0A0A0MT12|A0A0A0MT12_HUMAN;A0A0G2JJZ9|A0A0G2JJZ9_HUMAN;A0A0D9SEM9|A0A0D9SEM9_HUMAN;A0A0G2JHN7|A0A0G2JHN7_HUMAN;A0A140T996|A0A140T996_HUMAN;H0Y400|H0Y400_HUMAN;A0A140T973|A0A140T973_HUMAN;H0YCC6|H0YCC6_HUMAN	7	7	356.57	0.00374662	0.00238412	2.5305	0.917652	Competition	Control	O00148	312861	253023	354613	292354	518681	251407	625953	418715	1.06626e+06	546138	1.21656e+06	1.1442e+06	543401	317300	767320	322317	665795	356619	253373	322095	270532	385450	486997	435960	774203	856991	1.74647e+06	1.72098e+06	1.90117e+06	2.97129e+06	484623	609568	767320	544439	696188	676077
A0A087WXM6|A0A087WXM6_HUMAN;A0A087WWH0|A0A087WWH0_HUMAN;A0A0A0MRF8|A0A0A0MRF8_HUMAN;A0A087WY81|A0A087WY81_HUMAN;J3KSJ0|J3KSJ0_HUMAN	5	4	343.72	0.00396027	0.00251341	1.33542	0.913801	Competition	Control	A0A087WXM6	2.95765e+06	3.59787e+06	3.44834e+06	3.87314e+06	3.35341e+06	4.11957e+06	4.733e+06	5.1949e+06	3.99736e+06	4.28233e+06	5.43234e+06	4.87132e+06	4.64663e+06	3.859e+06	5.02586e+06	3.49617e+06	4.65377e+06	5.17165e+06	2.39528e+06	4.58003e+06	2.63071e+06	5.10649e+06	3.14856e+06	7.14368e+06	5.85396e+06	1.06325e+07	6.54746e+06	1.34944e+07	8.48936e+06	1.26499e+07	4.14401e+06	7.41356e+06	5.02586e+06	5.90552e+06	4.86621e+06	9.80438e+06
P05556|ITB1_HUMAN;C9JPK5|C9JPK5_HUMAN;H7C4N8|H7C4N8_HUMAN;C9JJP8|C9JJP8_HUMAN	15	13	846.14	0.00398669	0.00252353	4.2553	0.913331	Competition	Control	P05556	240134	365733	460492	622963	198275	41734.7	776216	811928	1.94307e+06	1.57101e+06	2.31654e+06	791138	645786	679373	381954	123758	208457	391224	194475	465573	351306	821337	186163	72371.5	960054	1.66179e+06	3.18264e+06	4.95052e+06	3.62015e+06	2.05444e+06	575933	1.30515e+06	381954	209044	217973	741680
P31150|GDIA_HUMAN	6	1	266.71	0.00400633	0.0025293	5.82207	0.912982	Competition	Control	P31150	35708.4	88028.9	36283.4	28220.6	31660.9	15849.4	206676	32529.5	257333	460108	278032	137884	155048	101151	111496	33336.6	93076.8	46570.7	28918.8	112060	27680.3	37207.1	29726.9	27484.1	255625	66578.6	421498	1.44988e+06	434492	358059	138277	194323	111496	56310.1	97325.7	88288.4
B4DDD8|B4DDD8_HUMAN;B3KWE1|B3KWE1_HUMAN;E7ETE2|E7ETE2_HUMAN;D6RJE6|D6RJE6_HUMAN;A0A2R8YCI2|A0A2R8YCI2_HUMAN	5	5	168.66	0.00404931	0.00254974	3.17553	0.912221	Competition	Control	B4DDD8	33534.1	95194.9	22023.6	43182.9	29687.8	42733	62032.6	133013	85508.8	108603	227616	229048	58750.9	131212	41130.8	37424.8	50329.2	88552.5	27157.9	121182	16801.6	56933.9	27874.2	74102.6	76724.3	272240	140059	342229	355706	594796	52395.9	252072	41130.8	63215.7	52626.8	167877
Q15758|AAAT_HUMAN;M0QXM4|M0QXM4_HUMAN;M0QX44|M0QX44_HUMAN	3	3	101.78	0.00407203	0.00255736	3.64349	0.91182	Competition	Control	Q15758	145900	8142.21	82020	146762	77055.5	1.30651e+06	402927	800301	1.39487e+06	1.71707e+06	710000	1.41066e+06	453519	850513	439530	1.52661e+06	615441	947467	118159	10364.9	62572.4	193497	72348.5	2.26559e+06	498356	1.63799e+06	2.28471e+06	5.41079e+06	1.10955e+06	3.66323e+06	404463	1.63393e+06	439530	2.57866e+06	643536	1.7962e+06
G5E9Z2|G5E9Z2_HUMAN	4	4	165.24	0.00415191	0.00260073	6.19712	0.910416	Competition	Probe	G5E9Z2	12159	8509.81	28478.8	11164.9	6930.64	15839.3	16031.5	8446.14	60602	83682.2	69212.9	94869.9	3670.63	7303.85	4225.64	22951.8	11759	3798.66	9847.09	10832.9	21726.2	14720.2	6507.27	27466.7	19828.4	17286.9	99262.7	263698	108162	246360	3273.58	14031.5	4225.64	38768.8	12295.8	7201.47
H3BPJ9|H3BPJ9_HUMAN	1	1	44.51	0.00426293	0.00266334	3.67241	0.908484	Competition	Control	H3BPJ9	26253.1	61718.3	32771.3	106733	32975.7	53865.5	124648	49008.3	185412	227692	276360	291182	70870.2	86342.2	44408.2	131497	32639.1	35162	21261.3	78566.5	25001	140721	30961.3	93407.2	154169	100306	303694	717498	431880	756147	63204.4	165873	44408.2	222116	34129.1	66659.9
Q96S97|MYADM_HUMAN;A0A494C017|A0A494C017_HUMAN	2	2	70.6	0.00427741	0.00266547	8.34844	0.908233	Competition	Control	Q96S97	81725.5	16493.5	65685.8	47085.6	18662.3	58929.2	508972	58880.6	722477	101729	866202	150948	88358.7	14571.1	99982.5	73381.7	57073.2	41316.3	66186.1	20996	50111.2	62079.3	17522.3	102188	629516	120512	1.18338e+06	320568	1.35365e+06	391983	78801.2	27992.6	99982.5	123952	59678.6	78327.2
O14929|HAT1_HUMAN	2	2	135.55	0.00435358	0.00270592	37.4755	0.906922	Competition	Control	O14929	2965.45	1118.5	7.15607	12277.2	0	10114.1	137400	6187.5	224068	223888	243574	157323	36813.4	21672.1	35928.1	9080.87	11175.5	32530.3	2401.59	1423.84	5.45931	16186.7	0	17538.7	169941	12664.1	367012	705511	380644	408540	32831.4	41634.4	35928.1	15338.9	11685.7	61670.7
D6R9P3|D6R9P3_HUMAN;Q99729|ROAA_HUMAN	5	4	184.91	0.00438874	0.00272074	9.31139	0.906319	Competition	Control	D6R9P3	119446	117556	72750.2	42137.5	60538	34508.3	215860	66386.1	385612	1.61463e+06	504172	1.37493e+06	86532.7	210249	206516	168656	229370	65611.4	96734.5	149647	55500.5	55555.6	56840	59840.3	266985	135874	631611	5.08801e+06	787892	3.57045e+06	77172.7	403911	206516	284884	239840	124386
P02533|K1C14_HUMAN;P19012|K1C15_HUMAN;A0A3B3IS58|A0A3B3IS58_HUMAN;A8MT21|A8MT21_HUMAN;K7EMS3|K7EMS3_HUMAN;K7ESE1|K7ESE1_HUMAN;K7ENV3|K7ENV3_HUMAN;P35900|K1C20_HUMAN;C9JTG5|C9JTG5_HUMAN;Q8N1A0|KT222_HUMAN	29	6	2085.99	0.00450368	0.00277954	1.83386	0.904364	Control	Competition	P02533	2.36669e+07	2.40651e+07	2.24684e+07	2.38061e+07	2.23445e+07	2.67607e+07	1.3943e+07	1.78293e+07	9.69952e+06	1.54251e+07	8.78417e+06	1.23573e+07	2.41684e+07	4.01631e+07	1.53262e+07	1.29951e+07	1.58656e+07	2.3044e+07	1.91668e+07	3.06345e+07	1.7141e+07	3.13869e+07	2.09796e+07	4.64052e+07	1.72452e+07	3.64915e+07	1.58873e+07	4.86074e+07	1.37274e+07	3.20895e+07	2.15541e+07	7.71578e+07	1.53262e+07	2.19505e+07	1.65899e+07	4.36867e+07
P31948|STIP1_HUMAN;F5H783|F5H783_HUMAN;F5GXD8|F5GXD8_HUMAN;H0YGI8|H0YGI8_HUMAN	11	11	533.4	0.0045067	0.00277954	2.91006	0.904313	Competition	Control	P31948	391409	204574	404767	205205	443429	155640	919654	325903	1.09349e+06	1.21695e+06	1.08985e+06	606893	559426	266803	563515	330124	336908	134725	316986	260419	308794	270549	416342	269892	1.13746e+06	667032	1.79107e+06	3.83482e+06	1.70316e+06	1.57599e+06	498914	512558	563515	557626	352288	255411
H0Y9V7|H0Y9V7_HUMAN;H0Y8X9|H0Y8X9_HUMAN	3	3	155.66	0.00455715	0.00280347	1.50901	0.903461	Control	Competition	H0Y9V7	2.9696e+06	2.75912e+06	2.57409e+06	3.19492e+06	2.36233e+06	2.89816e+06	1.7056e+06	2.36833e+06	1.43773e+06	2.31998e+06	1.39317e+06	1.8806e+06	1.94161e+06	2.79257e+06	2.11201e+06	3.42642e+06	2.10029e+06	2.52063e+06	2.40495e+06	3.51232e+06	1.96375e+06	4.2123e+06	2.21802e+06	5.02564e+06	2.10956e+06	4.8473e+06	2.35492e+06	7.31068e+06	2.17717e+06	4.88357e+06	1.73159e+06	5.36483e+06	2.11201e+06	5.78771e+06	2.19617e+06	4.77859e+06
P62805|H4_HUMAN	8	7	515.45	0.00460537	0.00282591	1.83159	0.902651	Control	Competition	P62805	3.30629e+07	3.68742e+07	2.96169e+07	4.06544e+07	3.11752e+07	4.24987e+07	2.54218e+07	3.30259e+07	1.29974e+07	1.61114e+07	1.19628e+07	1.72545e+07	2.39786e+07	2.45217e+07	1.66626e+07	2.9016e+07	1.46417e+07	3.02136e+07	2.67763e+07	4.69403e+07	2.25945e+07	5.36003e+07	2.92708e+07	7.36962e+07	3.14427e+07	6.75947e+07	2.1289e+07	5.077e+07	1.86947e+07	4.48069e+07	2.13849e+07	4.71088e+07	1.66626e+07	4.90121e+07	1.53101e+07	5.72787e+07
Q16222|UAP1_HUMAN	6	6	266.24	0.00462044	0.00282794	3.48686	0.902398	Competition	Control	Q16222	147336	132894	138022	76464.3	161635	65367.3	475957	221152	606587	145527	772833	294473	305082	146526	299051	167934	221914	94524.2	119321	169172	105296	100813	151761	113352	588682	452636	993557	458583	1.20774e+06	764692	272082	281493	299051	283663	232044	179198
Q7Z7L1|SLN11_HUMAN	1	1	37.16	0.00466821	0.00284992	2.4996	0.901601	Probe	Competition	Q7Z7L1	15988.7	11145	26177.2	5873.62	19039.9	528.063	0	0	0	32390.4	0	0	8803.82	0	3643.38	4018.5	61516.3	2980.91	12948.6	14187.4	19970.4	7743.99	17876.8	915.704	0	0	0	102068	0	0	7851.53	0	3643.38	6787.8	64324.5	5651.19
E7EQR4|E7EQR4_HUMAN	9	3	352.56	0.0047627	0.00290025	4.50876	0.900033	Competition	Control	E7EQR4	11247.2	5977.73	14538.2	62659.6	18935.8	20604.9	34347.6	67613.7	105146	69068.6	259921	67911.9	43985.5	6769.08	46467.7	22349.5	12247.6	30748.9	9108.63	7609.56	11091.1	82612.7	17779.1	35730.6	42482.4	138386	172223	217648	406190	176355	39227.7	13004.1	46467.7	37751.4	12806.7	58293.5
J3KQ32|J3KQ32_HUMAN	3	3	93.88	0.00488048	0.00296447	4.42542	0.898097	Competition	Probe	J3KQ32	21442.7	27617.1	22912.9	78350.8	25628.1	188613	102902	45105.3	59847.9	55511.1	183578	78519.6	21042.1	10117	30803.3	20661.2	23001.2	13113.1	17365.6	35156.2	17480.1	103301	24062.6	327071	127274	92317.7	98027.6	174925	286886	203901	18766	19435.9	30803.3	34899.6	24051.2	24859.7
E5RJX2|E5RJX2_HUMAN;E5RIP1|E5RIP1_HUMAN	2	2	122.02	0.00493468	0.00298984	2.21469	0.897213	Competition	Control	E5RJX2	80813.5	175911	107879	126277	80238.7	105881	189006	146558	245500	337979	263068	317237	226177	61141.7	146592	176872	135925	94371.7	65447.6	223932	82300.1	166488	75337.1	183607	233770	299962	402115	1.06503e+06	411108	823806	201712	117460	146592	298762	142130	178909
Q9UHG3|PCYOX_HUMAN;F8W8W4|F8W8W4_HUMAN;C9K055|C9K055_HUMAN;C9JGT6|C9JGT6_HUMAN	7	7	424.95	0.00495408	0.00299405	5.64298	0.896897	Probe	Control	Q9UHG3	86117.8	157255	117351	87985.8	143821	70597.4	487523	136103	778287	312069	741791	231646	554770	1.17843e+06	808980	72129.1	624288	503427	69743.3	200184	89526.1	116004	135035	122422	602988	278564	1.27479e+06	983385	1.15923e+06	601543	494762	2.26389e+06	808980	121836	652787	954393
B5MD38|B5MD38_HUMAN;C9JE81|C9JE81_HUMAN	2	2	82.6	0.00501824	0.00302179	1.99323	0.895858	Competition	Probe	B5MD38	167763	205126	124657	124665	144363	171431	173988	186871	331932	301607	402336	373008	134236	128445	160205	258096	137075	69818.6	135864	261122	95099.6	164363	135544	297276	215195	382472	543686	950419	628749	968635	119716	246757	160205	435960	143333	132362
Q9H9B4|SFXN1_HUMAN;D6RDG7|D6RDG7_HUMAN;D6RAE9|D6RAE9_HUMAN;A0A0A0MS41|A0A0A0MS41_HUMAN	4	4	184.31	0.00502511	0.00302179	4.37402	0.895747	Competition	Control	Q9H9B4	81577.7	63868.5	19849.3	96822	27121.5	43180.6	37643.5	172897	242809	346332	290966	363361	143981	55169.8	45910.7	41190.2	59412.5	68628	66066.4	81303.7	15142.9	127654	25464.8	74878.7	46559	353872	397708	1.09136e+06	454706	943584	128407	105987	45910.7	69576	62124.7	130105
P33897|ABCD1_HUMAN	2	2	80.76	0.00516013	0.00309525	33.8254	0.89358	Competition	Control	P33897	1072.54	532.527	0	334.83	493.098	1947.49	1573.32	13815.4	28632.1	29695.6	41457.1	32998.1	2563.99	32.5904	1774.22	198.242	43.345	536.804	868.604	677.9	0	441.453	462.976	3377.11	1945.94	28276.1	46897.9	93576.4	64786.8	85690	2286.65	62.6098	1774.22	334.858	45.3237	1017.67
O75369|FLNB_HUMAN;E7EN95|E7EN95_HUMAN;A0A0A0MT44|A0A0A0MT44_HUMAN;A0A0C4DGA1|A0A0C4DGA1_HUMAN;H7C5L4|H7C5L4_HUMAN	24	22	967.9	0.00522956	0.00312909	2.80745	0.892476	Competition	Control	O75369	70618	136001	111363	196711	106882	193207	147288	369135	408520	492209	192448	677857	162992	257055	140783	201330	109889	199301	57190.6	173128	84958.1	259352	100353	335036	182172	755515	669134	1.55104e+06	300747	1.76027e+06	145361	493831	140783	340075	114905	377834
P61247|RS3A_HUMAN;D6RG13|D6RG13_HUMAN;D6RAT0|D6RAT0_HUMAN;E9PFI5|E9PFI5_HUMAN;D6RB09|D6RB09_HUMAN;H0Y9Y4|H0Y9Y4_HUMAN;D6R9B6|D6R9B6_HUMAN;D6RAS7|D6RAS7_HUMAN;D6RED7|D6RED7_HUMAN;D6RI02|D6RI02_HUMAN;D6RGE0|D6RGE0_HUMAN	10	10	584.9	0.00527714	0.00314972	2.98215	0.891723	Competition	Control	P61247	689294	515591	794793	972897	756763	439693	2.0247e+06	1.85424e+06	2.02424e+06	1.11988e+06	2.69059e+06	2.71901e+06	1.47043e+06	1.11536e+06	1.30361e+06	201128	1.13708e+06	1.14169e+06	558231	656341	606341	1.2827e+06	710535	762465	2.50423e+06	3.79511e+06	3.3156e+06	3.52896e+06	4.20469e+06	7.06077e+06	1.31138e+06	2.14272e+06	1.30361e+06	339733	1.18899e+06	2.1644e+06
P52597|HNRPF_HUMAN	3	2	178.82	0.00531048	0.00316098	8.22067	0.891197	Competition	Control	P52597	29937.2	5732.61	34574.5	59191.7	18991.9	3837.98	54763.2	167166	740277	47805.5	112561	129155	59853.7	78179.5	44648.5	16989.2	29672.2	22394.9	24244.9	7297.53	26376.6	78040.5	17831.7	6655.37	67733.2	342141	1.21253e+06	150644	175905	335391	53379.5	150191	44648.5	28697.1	31026.8	42456.2
Q14257|RCN2_HUMAN;H0YL43|H0YL43_HUMAN;A8MXP8|A8MXP8_HUMAN	6	6	403.78	0.00532228	0.00316098	9.47231	0.891011	Competition	Control	Q14257	37498.1	59658.8	75438.5	40569.7	44102.1	36457.4	217193	160267	59932.4	390609	1.83065e+06	123604	25932	40507.5	37252.6	44003.5	153955	97585.5	30368.2	75944.8	57551.5	53488.6	41408.1	63220.1	268632	328021	98166	1.23088e+06	2.86083e+06	320978	23127	77819.4	37252.6	74328.1	160983	185002
Q86Y82|STX12_HUMAN;B1AJQ6|B1AJQ6_HUMAN	2	2	73.03	0.00534162	0.00316466	5.23612	0.890707	Competition	Control	Q86Y82	10806.8	8815.88	6381.85	17450	4148.94	21989.8	61170.9	12471.2	77927.6	17979.9	135227	59622.8	75387.5	12267.7	49130.2	31833.7	45605.8	34814.7	8751.97	11222.5	4868.66	23006.8	3895.5	38132.1	75658.5	25524.9	127641	56657.8	211324	154829	67233	23567.5	49130.2	53771.5	47687.7	66001.5
P00390|GSHR_HUMAN	1	1	40.98	0.00536257	0.00316926	13.8515	0.890378	Competition	Control	P00390	7748.57	0	0	0	0	0	14457.1	19958.7	11521.5	15093.2	23868.7	22430.5	18032.2	0	13458	0	12046.8	0	6275.25	0	0	0	0	0	17881.1	40849.8	18871.6	47561.3	37300.7	58247.9	16081.7	0	13458	0	12596.8	0
P19367|HXK1_HUMAN;B1AR63|B1AR63_HUMAN;B1AR62|B1AR62_HUMAN;E9PB90|E9PB90_HUMAN;Q2TB90|HKDC1_HUMAN	10	10	410.71	0.00540504	0.00317908	2.8976	0.889714	Competition	Control	P19367	78997.3	99294.4	55310.7	60169.2	59393.9	82286.3	98512.8	66854.5	193476	317358	329524	256040	120053	56530.8	126199	48113.5	60769.6	37798.1	63976.6	126400	42196.1	79329.3	55765.7	142691	121844	136832	316903	1.00005e+06	514961	664890	107067	108602	126199	81270.4	63543.7	71657.4
Q04941|PLP2_HUMAN	2	1	94.77	0.00540563	0.00317908	15.1852	0.889704	Competition	Control	Q04941	87865.8	64983.7	79712.1	79167.6	83328.3	62251.1	716386	19390.8	1.51945e+06	2.18047e+06	1.20256e+06	1.30606e+06	574790	700045	691655	557315	293216	309628	71158.9	82723.3	60811.8	104377	78238	107949	886054	39687.5	2.48877e+06	6.87105e+06	1.8793e+06	3.39159e+06	512616	1.34486e+06	691655	941382	306601	586991
H0YFD6|H0YFD6_HUMAN;A0A2R8Y4F5|A0A2R8Y4F5_HUMAN;A0A2R8YG21|A0A2R8YG21_HUMAN;A0A2R8Y688|A0A2R8Y688_HUMAN	18	18	839.56	0.00554406	0.00325254	6.46421	0.887554	Competition	Control	H0YFD6	457542	59977.7	408388	159165	302085	62544.7	1.40282e+06	293262	402067	4.34131e+06	2.07999e+06	851723	1.5214e+06	357458	1.16186e+06	1.00175e+06	596035	631289	370544	76350.8	311556	209848	283631	108458	1.73506e+06	600223	658564	1.36803e+07	3.2505e+06	2.21177e+06	1.35683e+06	686715	1.16186e+06	1.6921e+06	623244	1.19679e+06
P49721|PSB2_HUMAN;A0A087WVV1|A0A087WVV1_HUMAN	6	5	203.74	0.00557628	0.00326349	7.7442	0.887057	Competition	Control	P49721	41814.6	72713.7	38639.6	53246.3	38235.9	47423.5	276546	22984.3	425613	376607	639225	520901	123211	36360.8	145403	108844	91375.5	86738.4	33863.9	92563.6	29477.9	70201.9	35900.2	82236.3	342043	47042.3	697131	1.18676e+06	998944	1.35268e+06	109884	69853	145403	183853	95546.8	164438
P15531|NDKA_HUMAN;E7ERL0|E7ERL0_HUMAN;O60361|NDK8_HUMAN;C9K028|C9K028_HUMAN	4	4	390.01	0.00571268	0.00332944	4.4482	0.884968	Competition	Control	P15531	341860	109293	189335	199748	284619	71565.9	1.10983e+06	634334	1.45614e+06	788269	707343	626008	725278	524925	810241	49998.7	292422	360277	276858	139129	144442	263355	267233	124101	1.37268e+06	1.2983e+06	2.38508e+06	2.48398e+06	1.1054e+06	1.62563e+06	646827	1.00844e+06	810241	84454.7	305771	683011
P50990|TCPQ_HUMAN;H7C4C8|H7C4C8_HUMAN;H7C2U0|H7C2U0_HUMAN	6	6	228.56	0.00571666	0.00332944	5.77998	0.884907	Competition	Control	P50990	61743	27203.1	17676.7	36545	53481.3	23212.7	80127.9	51141.9	231101	227660	333321	347446	124262	91695.2	117506	95590.2	12219.9	70033	50003.1	34629.1	13485.4	48182.2	50214.3	40252.8	99105.3	104673	378530	717397	520895	902253	110821	176156	117506	161465	12777.8	132768
I3L1P8|I3L1P8_HUMAN	1	1	49.79	0.00575427	0.00334325	10.7294	0.884335	Competition	Probe	I3L1P8	10107.3	23049.5	15356.7	28021.2	18155.1	97079.3	76686	32495.2	427869	251816	396123	21931.1	30532.4	7578.06	19494.3	12347.8	13818.8	28715.8	8185.49	29341.7	11715.5	36944.2	17046.1	168343	94848.2	66508.4	700827	793519	619038	56951.2	27229.7	14558.3	19494.3	20857.1	14449.7	54439.3
P13639|EF2_HUMAN;K7EJ74|K7EJ74_HUMAN	38	37	2251.84	0.0058189	0.00337266	1.67796	0.883356	Competition	Control	P13639	7.38275e+06	6.42847e+06	5.81844e+06	5.83761e+06	4.82646e+06	2.75184e+06	9.0704e+06	7.49949e+06	8.16907e+06	6.45301e+06	1.22997e+07	1.19576e+07	8.96191e+06	7.14929e+06	7.90544e+06	7.42045e+06	1.03898e+07	9.59819e+06	5.97898e+06	8.18336e+06	4.43885e+06	7.69652e+06	4.53163e+06	4.77192e+06	1.12186e+07	1.53493e+07	1.33805e+07	2.03346e+07	1.92213e+07	3.10517e+07	7.99252e+06	1.37346e+07	7.90544e+06	1.25342e+07	1.08641e+07	1.81962e+07
Q7Z589|EMSY_HUMAN	1	1	41.62	0.00587954	0.00339961	3.41894	0.882443	Control	Competition	Q7Z589	195073	592153	174101	546323	145536	285943	56581.4	229756	38664	123852	84271.3	34047.8	117740	188832	124515	387520	156301	254741	157982	753802	132820	720292	136645	495848	69982.1	470245	63329.5	390281	131694	88416	105004	362768	124515	654575	163436	482935
P38919|IF4A3_HUMAN	3	1	226.67	0.00596974	0.00344349	8.48128	0.881092	Competition	Control	P38919	2008.26	1869.69	754.877	3228.51	2464.67	2399.64	3743.63	7382.94	13826.2	30300.6	42500.1	10176.4	5447.72	4997.48	4745.85	15886.5	547.761	3057.96	1626.4	2380.09	575.89	4256.58	2314.12	4161.17	4630.27	15110.8	22646.6	95482.6	66416.7	26426.3	4858.45	9600.7	4745.85	26834.5	572.767	5797.27
E9PJ32|E9PJ32_HUMAN;H0YCU9|H0YCU9_HUMAN	2	2	46.23	0.00606824	0.00349193	72.0199	0.879628	Competition	Control	E9PJ32	1079.69	2067.96	1953.47	0	0	0	47550.4	28438	51665.5	43942.4	90933.2	104852	4702.78	0	17593	658.375	905.106	19273.5	874.398	2632.48	1490.29	0	0	0	58812.2	58204.5	84625.2	138470	142105	272282	4194.09	0	17593	1112.09	946.425	36538.5
H0Y7A7|H0Y7A7_HUMAN;E7EMB3|E7EMB3_HUMAN;F8WBR5|F8WBR5_HUMAN;G3V361|G3V361_HUMAN	3	3	196.5	0.00644247	0.00369843	73.6031	0.874166	Competition	Control	H0Y7A7	20013.6	22110.4	17216.4	34563	12213.3	11551.9	1.14748e+06	2227.91	1.44054e+06	1.2906e+06	2.27899e+06	2.50093e+06	59573	27741.9	32112.2	5398.01	42339	70631	16208.2	28146.2	13134.3	45569.1	11467.2	20031.9	1.41925e+06	4559.9	2.35953e+06	4.06691e+06	3.56147e+06	6.49446e+06	53129.1	53295.1	32112.2	9117.99	44271.8	133902
Q8N6L1|KTAP2_HUMAN	1	1	70.69	0.00654813	0.00373785	72.0631	0.872652	Competition	Control	Q8N6L1	8087.16	7555.66	445.346	69.4798	0	1621.44	111511	116935	240413	2540.43	415116	394700	163682	110631	91233.3	298.539	31976.2	22616.2	6549.46	9618.25	339.751	91.6048	0	2811.72	137922	239333	393784	8005.36	648720	1.02496e+06	145977	212535	91233.3	504.274	33435.9	42875.7
Q02790|FKBP4_HUMAN	3	3	92.95	0.00655339	0.00373785	7.48634	0.872577	Competition	Control	Q02790	5707.92	17436.3	10447.4	13969	9299.51	10581.7	110037	19647.6	14692.4	133183	171839	55493.7	62234.6	7267.7	35628.8	11283.5	30875.8	26757.6	4622.61	22196.2	7970.25	18417.3	8731.43	18349.5	136098	40213.2	24065.4	419683	268540	144107	55502.9	13962	35628.8	19059.4	32285.3	50726.9
A0A0U1RQF0|A0A0U1RQF0_HUMAN	11	10	494.37	0.00655776	0.00373785	2.69053	0.872515	Competition	Control	A0A0U1RQF0	120999	220136	74521.2	273970	61309.3	37456	268639	225723	368344	440254	400680	417547	258550	233534	378168	96964.7	190721	419573	97991.8	280230	56851.6	361212	57564.1	64951.8	332263	461992	603327	1.38732e+06	626160	1.08429e+06	230583	448644	378168	163787	199427	795423
D6RAA6|D6RAA6_HUMAN;D6RBY2|D6RBY2_HUMAN;H0Y8N0|H0Y8N0_HUMAN	3	3	119.48	0.00660773	0.00375743	4.98319	0.871804	Competition	Control	D6RAA6	31172.4	92189.5	41749.9	44434.9	23948.7	29528.2	114917	68649.7	224087	268720	416766	217559	101788	3681.04	102063	48938.4	45412	24986.5	25245.3	117356	31850.7	58584.6	22485.7	51204.4	142134	140507	367042	846784	651298	564961	90778.1	7071.69	102063	82663.7	47485.1	47369.2
P21980|TGM2_HUMAN;A2A299|A2A299_HUMAN;A2A2A0|A2A2A0_HUMAN	6	6	237.4	0.00686019	0.00389179	3.75779	0.86825	Competition	Control	P21980	60638.6	133422	65843.8	56124.1	50328.7	102191	224869	523693	65472.4	121726	313535	511412	180130	122534	161920	150810	122990	190495	49108.7	169844	50231.7	73996.1	47254.2	177207	278126	1.07185e+06	107240	383580	489974	1.32804e+06	160646	235401	161920	254739	128605	361139
P18085|ARF4_HUMAN;C9JAK5|C9JAK5_HUMAN;C9JPM4|C9JPM4_HUMAN;F5H0C7|F5H0C7_HUMAN;U3KQF2|U3KQF2_HUMAN;F5H1V1|F5H1V1_HUMAN	5	3	295.98	0.00689041	0.00389974	4.53378	0.867829	Competition	Control	P18085	157795	102419	129673	86461.4	158868	146143	609061	138075	994453	435499	1.00651e+06	358908	397937	54129.1	374228	88458.5	228718	173526	127792	130378	98926.4	113994	149163	253425	753310	282601	1.62886e+06	1.37234e+06	1.57292e+06	932019	354893	103988	374228	149419	239159	328970
H7C4G5|H7C4G5_HUMAN;H7C4I3|H7C4I3_HUMAN;J3QLR1|J3QLR1_HUMAN	2	2	80.3	0.00692565	0.00391048	4.20402	0.867339	Competition	Control	H7C4G5	14376.2	14584.1	18387.1	10911.4	30433.8	18772.4	66895.5	70470.4	150830	16481.4	81125.1	65981.9	35480.8	7837.66	46411.5	13721.2	26385.6	46374.7	11642.7	18565.4	14027.4	14386	28574.7	32552.9	82738.9	144233	247051	51935.9	126778	171343	31642.9	15057	46411.5	23177.1	27590.1	87916.9
O94925|GLSK_HUMAN;H7BZD1|H7BZD1_HUMAN;C9JIJ6|C9JIJ6_HUMAN	6	5	357.09	0.00696922	0.00392587	4.56311	0.866735	Competition	Control	O94925	131503	13919.1	100191	117546	114445	52995.9	365155	145196	666031	386203	723653	134953	143971	94622.1	163165	35592.6	170895	122598	106499	17718.8	76435.3	154977	107454	91899.3	451637	297175	1.09092e+06	1.21699e+06	1.13088e+06	350449	128398	181779	163165	60120.9	178697	232420
Q5SRN5|Q5SRN5_HUMAN;A0A1W2PS24|A0A1W2PS24_HUMAN;Q5SRN7|Q5SRN7_HUMAN;P13746|1A11_HUMAN;A0A0G2JIF2|A0A0G2JIF2_HUMAN;A0A0G2JL56|A0A0G2JL56_HUMAN;A0A0G2JI36|A0A0G2JI36_HUMAN;P05534|1A24_HUMAN;P30447|1A23_HUMAN;A0A0G2JPQ3|A0A0G2JPQ3_HUMAN;A0A0G2JNV5|A0A0G2JNV5_HUMAN;A0A0G2JNX1|A0A0G2JNX1_HUMAN;A0A1W2PP29|A0A1W2PP29_HUMAN	16	3	1592.94	0.00700367	0.00393605	2.74898	0.866259	Competition	Control	Q5SRN5	217097	299934	324849	281266	207119	146507	299252	279826	1.25416e+06	589350	973489	663542	419121	519165	323127	385685	296244	573511	175818	381811	247825	370832	194467	254055	370127	572725	2.05425e+06	1.85715e+06	1.52131e+06	1.7231e+06	373786	997373	323127	651476	309768	1.08726e+06
Q96RQ3|MCCA_HUMAN;E9PHF7|E9PHF7_HUMAN;E9PG35|E9PG35_HUMAN;F5GYT8|F5GYT8_HUMAN;G5E9X5|G5E9X5_HUMAN;F8WDI3|F8WDI3_HUMAN	22	21	1449.04	0.00746172	0.0041837	1.50299	0.860037	Control	Competition	Q96RQ3	1.16797e+07	8.43239e+06	1.21658e+07	1.25535e+07	1.05626e+07	1.1785e+07	6.6913e+06	5.91322e+06	5.91333e+06	5.69445e+06	7.0268e+06	1.34579e+07	9.28771e+06	1.04207e+07	9.39469e+06	1.017e+07	1.11227e+07	1.60076e+07	9.45893e+06	1.07343e+07	9.28117e+06	1.65511e+07	9.91735e+06	2.04361e+07	8.27605e+06	1.21027e+07	9.68571e+06	1.79443e+07	1.09811e+07	3.49478e+07	8.28308e+06	2.00193e+07	9.39469e+06	1.71785e+07	1.16304e+07	3.03471e+07
P17655|CAN2_HUMAN	6	6	230.71	0.00755064	0.00422371	6.5186	0.858852	Competition	Control	P17655	6616.21	17166.6	3696.77	3595.71	8924.75	21920	70619	11944	58063.5	14242.1	183675	65088.5	34421.3	21576.4	25418.7	13772.1	24392.8	8917.47	5358.19	21852.8	2820.24	4740.72	8379.56	38011.1	87344.4	24445.9	95104.8	44879.3	287037	169023	30698	41450.6	25418.7	23262.9	25506.4	16905.7
P61160|ARP2_HUMAN;F5H6T1|F5H6T1_HUMAN;A0A1B0GWD0|A0A1B0GWD0_HUMAN	4	4	250.41	0.00771073	0.00430326	3.57807	0.856736	Competition	Control	P61160	23005.8	31301.3	42684.5	101409	20499	44122.8	132054	131414	195362	36087	172834	273358	87370.6	34171	69632.5	33955.5	115129	75165.6	18631.4	39846.1	32563.7	133701	19246.8	76512.6	163330	268968	319993	113717	270096	709862	77919.9	65646.1	69632.5	57355.6	120385	142498
Q96AQ6|PBIP1_HUMAN	2	2	77.7	0.0080188	0.00446483	3.25387	0.852729	Competition	Control	Q96AQ6	45931.2	54831.4	28603.3	51296.8	26061.9	10557.6	46796	60743.3	108474	137552	152981	200461	33012.7	98708.4	62246.8	23251.8	21521.9	16562.7	37197.8	69799.6	21821.2	67631.6	24469.9	18307.8	57879	124324	177675	433453	239070	520560	29441.8	189630	62246.8	39275.5	22504.3	31399.4
Q14204|DYHC1_HUMAN;A0A2R8Y706|A0A2R8Y706_HUMAN;A0A2R8Y5T0|A0A2R8Y5T0_HUMAN;A0A2R8YFZ7|A0A2R8YFZ7_HUMAN;A0A2R8Y6H2|A0A2R8Y6H2_HUMAN;A0A2R8Y542|A0A2R8Y542_HUMAN;A0A2R8Y6I5|A0A2R8Y6I5_HUMAN;A0A2R8YGC7|A0A2R8YGC7_HUMAN;H0YJ21|H0YJ21_HUMAN	29	29	1196.57	0.00807676	0.00447807	3.17524	0.851984	Competition	Control	Q14204	138200	135794	47122.7	103841	87280.3	147641	263726	101583	338869	258856	459459	672779	237327	366113	187104	134241	120039	275910	111922	172864	35949.5	136908	81948.6	256021	326187	207911	555048	815701	718017	1.74709e+06	211656	703344	187104	226751	125519	523068
A0A087WYD6|A0A087WYD6_HUMAN;A0A140T9S0|A0A140T9S0_HUMAN;Q9NRK6|ABCBA_HUMAN	4	4	119.48	0.00808926	0.00447807	6.08009	0.851824	Competition	Control	A0A087WYD6	17709.6	15050.5	10365.3	58554.4	22319.6	264037	242805	218872	577243	502597	765684	52096.8	103659	195856	123368	146499	31214.4	15905.1	14342.3	19159	7907.59	77200.3	20956.2	457862	300310	447968	945493	1.58377e+06	1.19657e+06	135286	92446.2	376260	123368	247457	32639.3	30152.7
A0A087WW66|A0A087WW66_HUMAN;H7C378|H7C378_HUMAN;C9J9M4|C9J9M4_HUMAN	6	5	163.52	0.00809844	0.00447807	2.29305	0.851706	Competition	Control	A0A087WW66	174958	144470	154123	306935	143248	153226	248197	435231	622936	219268	663109	280783	270245	252270	174654	185968	252960	396792	141691	183908	117579	404674	134498	265707	306980	890794	1.02033e+06	690955	1.03627e+06	729142	241013	484638	174654	314126	264508	752235
P22314|UBA1_HUMAN;Q5JRR6|Q5JRR6_HUMAN;Q5JRR9|Q5JRR9_HUMAN;Q5JRS1|Q5JRS1_HUMAN	21	17	1228.09	0.00822867	0.00453965	1.85433	0.850045	Control	Probe	P22314	5.30867e+06	1.08339e+07	6.12575e+06	1.06699e+07	5.8265e+06	8.05313e+06	4.76957e+06	4.13672e+06	3.64843e+06	7.32223e+06	3.93402e+06	3.41603e+06	5.65509e+06	4.20257e+06	5.1768e+06	2.03672e+06	4.41585e+06	3.76086e+06	4.29928e+06	1.37914e+07	4.67329e+06	1.40676e+07	5.47058e+06	1.39648e+07	5.89919e+06	8.4667e+06	5.97592e+06	2.30737e+07	6.14786e+06	8.8708e+06	5.04339e+06	8.0736e+06	5.1768e+06	3.4403e+06	4.61744e+06	7.12981e+06
H0Y2Y8|H0Y2Y8_HUMAN;H7C3D3|H7C3D3_HUMAN	2	2	71.47	0.0083127	0.00456861	3.30324	0.848981	Competition	Probe	H0Y2Y8	24314.6	26803.5	48711	40864.3	24413.7	14767.7	109895	125539	126775	35513.2	145379	43648.2	36018.6	42928.4	24598.4	5046.47	12130.9	56905.7	19691.4	34120.5	37161.3	53877.1	22922.4	25608.4	135923	256943	207651	111908	227190	113347	32122.5	82470.1	24598.4	8524.19	12684.6	107881
P11413|G6PD_HUMAN;E7EM57|E7EM57_HUMAN	4	3	94.2	0.00834328	0.00456861	6.1292	0.848595	Competition	Control	P11413	10774.6	11378.5	13534.7	9822.39	12857.3	38665.9	87307.1	25136.7	43898.1	22112.8	171398	244884	37785.2	11989.1	26954.9	66126	19101.3	14487.4	8725.93	14484.6	10325.5	12950.2	12071.9	67049.8	107985	51447.6	71902.7	69681.6	267851	635920	33698.1	23032.3	26954.9	111696	19973.3	27465.1
Q96QK1|VPS35_HUMAN	2	2	95.06	0.00835522	0.00456861	3.5605	0.848444	Competition	Control	Q96QK1	31570	39435.9	9403.56	40035.5	31673.6	188388	160963	56195.8	372259	94548.5	276532	251875	96278.4	181821	80304.5	68111.2	91925.1	98600.1	25567.2	50201.4	7173.9	52784.3	29738.7	326680	199085	115017	609740	297939	432149	654075	85864.2	349298	80304.5	115049	96121.5	186925
P23526|SAHH_HUMAN	7	6	245.85	0.00836831	0.00456861	13.4225	0.848279	Competition	Control	P23526	69605.2	24577.9	7823.79	10393.3	9427.65	795.434	75287	1.14466e+06	49418.5	80950.2	126423	169172	92777.7	88572.9	34040.9	28305.5	36192.1	4523.94	56370.4	31287.3	5968.71	13702.9	8851.74	1379.35	93117.8	2.34279e+06	80944.8	255089	197566	439309	82742.1	170158	34040.9	47812	37844.3	8576.45
Q9NZM1|MYOF_HUMAN;H0YD14|H0YD14_HUMAN	8	7	360.38	0.00837613	0.00456861	2.87983	0.848181	Competition	Control	Q9NZM1	52519.3	7431.25	58475.4	32189.8	33471.4	3842	83651.2	57170.6	150993	72183.8	132999	44207.4	80884.8	65297.2	56898.8	108509	78981.7	69280.4	42533.3	9459.88	44610.4	42440.2	31426.7	6662.35	103463	117012	247318	227464	207843	114799	72135.6	125443	56898.8	183287	82587.2	131341
P61981|1433G_HUMAN	5	1	259.69	0.00857925	0.00466881	3.79409	0.845642	Competition	Control	P61981	33267.9	23176.4	22295.9	7191.31	33303.5	11520.8	108185	34403.9	81624.9	21765.4	187620	62499.2	85012.8	66797.1	83183.7	30739.4	121990	30829.3	26942.3	29503.2	17009.4	9481.29	31269.1	19978	133808	70415.1	133697	68586.8	293203	162299	75817.2	128325	83183.7	51923.1	127559	58446
A0A0A0MRJ6|A0A0A0MRJ6_HUMAN;F6S8N6|F6S8N6_HUMAN;C9J0F2|C9J0F2_HUMAN	4	3	107.95	0.00868153	0.00471381	5.70378	0.844375	Competition	Control	A0A0A0MRJ6	17857.1	14883.7	10878.3	7684.36	10925.2	7585	129196	54141.8	51545.6	10332.3	119353	33634.1	63085.9	37905.6	42355.7	8522.66	17357.4	16585.8	14461.8	18946.7	8299.01	10131.3	10257.8	13153	159794	110813	84428.9	32559	186518	87341.6	56262	72820.8	42355.7	14396	18149.8	31443.2
B1AH87|B1AH87_HUMAN	2	2	61.41	0.00890657	0.0048251	6.9776	0.841617	Competition	Control	B1AH87	4427.8	8349.01	9325.99	14363.5	5994.14	30305.1	16649	49800.5	26157.8	140447	34267.3	240407	14944.9	14575.9	8697.94	20555.5	5594.66	57162	3585.89	10628.2	7114.73	18937.3	5627.98	52551.5	20592.1	101928	42845	442573	53550.9	624294	13328.4	28001.8	8697.94	34721.1	5850.05	108367
I3L1D2|I3L1D2_HUMAN	1	1	34.99	0.00904905	0.00488756	21.3616	0.839891	Competition	Control	I3L1D2	10126.3	10356.3	2575.34	2734.71	6208.56	147.669	65521.5	65529.4	91473.7	132101	136108	196020	55541.1	541.823	47177.1	103.182	18697.4	26288.6	8200.9	13183.5	1964.7	3605.54	5829.3	256.07	81039.5	134120	149829	416273	212702	509028	49533.4	1040.9	47177.1	174.29	19551	49837.7
P30520|PURA2_HUMAN	1	1	52.93	0.0090625	0.00488756	9.76416	0.839728	Competition	Control	P30520	26850.2	5441.94	33085	8490.15	10115.4	40358	95330.3	25406.5	65426.2	725767	178347	123805	55790.3	32624	35051.1	198858	16820.5	20083.7	21744.9	6927.51	25240.3	11193.7	9497.44	69984.2	117908	52000	107164	2.28702e+06	278710	321499	49755.6	62674.2	35051.1	335900	17588.4	38074.5
A0A0A0MSG2|A0A0A0MSG2_HUMAN	4	3	148.13	0.00938921	0.00505243	16.8106	0.835828	Competition	Control	A0A0A0MSG2	2764.31	244.435	1527.81	4640.58	5122.72	4940.96	34608.5	1933.59	98567.8	43687.5	103749	40904.1	11959.3	3139	17537.6	1236.79	28143.7	19646.8	2238.7	311.162	1165.56	6118.31	4809.79	8568.03	42805.1	3957.51	161449	137667	162133	106221	10665.7	6030.36	17537.6	2089.11	29428.5	37246.3
P36578|RL4_HUMAN;H3BM89|H3BM89_HUMAN;H3BTP7|H3BTP7_HUMAN;H3BU31|H3BU31_HUMAN	13	12	827.11	0.00952358	0.00510924	1.70604	0.834245	Probe	Competition	P36578	5.45515e+06	8.45304e+06	5.22996e+06	6.83935e+06	5.20433e+06	8.1495e+06	3.69792e+06	5.84525e+06	3.96604e+06	4.74955e+06	5.98469e+06	5.97209e+06	5.29181e+06	7.72252e+06	6.84839e+06	1.02283e+07	9.27165e+06	1.21864e+07	4.4179e+06	1.07606e+07	3.9899e+06	9.01725e+06	4.88641e+06	1.41319e+07	4.57373e+06	1.19636e+07	6.49615e+06	1.49667e+07	9.35254e+06	1.55084e+07	4.71941e+06	1.48358e+07	6.84839e+06	1.7277e+07	9.6949e+06	2.31028e+07
P36957|ODO2_HUMAN;H0YJF9|H0YJF9_HUMAN	2	2	100.3	0.00955663	0.00510924	7.86758	0.833858	Probe	Control	P36957	85699.5	56507	73161.6	66232.6	65763.6	39361.6	350163	32724.9	291084	358415	488514	483055	220164	155758	166037	135232	950194	1.41521e+06	69404.5	71932.7	55814.4	87323.6	61746.3	68256.3	433095	66978.6	476779	1.12943e+06	763423	1.25441e+06	196349	299229	166037	228425	993571	2.68295e+06
H7C286|H7C286_HUMAN;H0YC94|H0YC94_HUMAN	2	2	69.68	0.00955851	0.00510924	2.6641	0.833836	Competition	Probe	H7C286	72818.3	100094	73897.8	296935	52814.1	182122	146478	259146	548662	492414	255684	220707	104836	253740	64562.7	115961	73269.6	109483	58972.5	127418	56376.1	391490	49587.9	315815	181170	530398	898678	1.55169e+06	399569	573137	93496.5	487461	64562.7	195875	76614.3	207558
Q6P2E9|EDC4_HUMAN	1	1	37.65	0.00960378	0.00512206	77.2908	0.833307	Competition	Control	Q6P2E9	0	0	0	3581.46	0	0	25937.2	59563.3	51371	14733.5	125209	0	5030.26	8799.87	7011.48	0	9240.31	18906	0	0	0	4721.93	0	0	32080.1	121909	84142.8	46428	195669	0	4486.15	16905.5	7011.48	0	9662.13	35841.9
O94919|ENDD1_HUMAN	3	3	166.09	0.00977318	0.00520088	13.7117	0.831339	Competition	Control	O94919	35783.4	28532.2	14024	5918.38	5632.98	4042.85	32130.7	16636.6	182904	286018	317898	452401	27278.1	40650.4	19431.8	1501.52	71074.1	28540.3	28979.5	36321	10698.8	7803.01	5288.88	7010.64	39740.5	34050.4	299587	901295	496793	1.1748e+06	24327.5	78093.9	19431.8	2536.27	74318.7	54106.5
Q9P2E9|RRBP1_HUMAN;A0A087WVV2|A0A087WVV2_HUMAN;F8W7S5|F8W7S5_HUMAN;A0A087WU26|A0A087WU26_HUMAN;A2A2S5|A2A2S5_HUMAN;C9J066|C9J066_HUMAN	12	10	685.53	0.00982752	0.00521568	5.09719	0.830711	Competition	Probe	Q9P2E9	40855.7	59826.5	59537.9	127131	38023.9	192193	292119	349691	409985	94557.2	961333	69372.6	65625.3	83116.4	60884.8	147147	38544.1	31791.4	33087.4	76158.3	45421	167614	35701.1	333279	361304	715718	671533	297967	1.50232e+06	180148	58526.8	159676	60884.8	248553	40303.6	60270
Q53G44|IF44L_HUMAN;C9JPJ0|C9JPJ0_HUMAN	2	2	53.28	0.00984437	0.00521568	38.3406	0.830517	Competition	Probe	Q53G44	0	2695.27	1853.55	3348.74	356.369	3425.32	8080.59	23920.9	54440.3	64307.2	7331.78	86642.8	0	0	2054.18	715.171	0	3613.53	0	3431.04	1414.06	4415.1	334.6	5939.79	9994.39	48959.2	89170.2	202644	11457.7	224996	0	0	2054.18	1208.02	0	6850.5
Q99536|VAT1_HUMAN;K7EM19|K7EM19_HUMAN;K7ERT7|K7ERT7_HUMAN;K7EJM4|K7EJM4_HUMAN;K7ER81|K7ER81_HUMAN;K7ESA3|K7ESA3_HUMAN	5	5	230.86	0.0100448	0.00531016	3.00475	0.828223	Competition	Control	Q99536	95523.3	78725.5	89475.9	63398.8	91187	325033	240743	187056	490281	342961	609120	363399	323200	400035	271294	54509.6	278093	201021	77360.4	100216	68260.4	83587.3	85616.7	563634	297761	382850	803054	1.08073e+06	951898	943681	288240	768511	271294	92074.3	290788	381094
P08729|K2C7_HUMAN;A0A1W2PRP1|A0A1W2PRP1_HUMAN;Q14CN4|K2C72_HUMAN	20	13	1051.06	0.0100886	0.00532162	4.43879	0.827725	Competition	Control	P08729	379667	573159	367484	275875	288601	175820	1.8324e+06	1.65216e+06	512180	270124	2.78084e+06	2.09888e+06	840324	207212	540063	337156	330581	658884	307477	729623	280350	363724	270971	304887	2.26639e+06	3.3815e+06	838923	851210	4.34575e+06	5.4504e+06	749428	398076	540063	569504	345673	1.24911e+06
P35527|K1C9_HUMAN;K7EQQ3|K7EQQ3_HUMAN	46	44	4756.5	0.01029	0.00541599	1.91361	0.825451	Control	Competition	P35527	2.23143e+08	1.58411e+08	1.27402e+08	1.69454e+08	1.99995e+08	1.80779e+08	1.09496e+08	1.3339e+08	8.45201e+07	9.76262e+07	5.21843e+07	7.62847e+07	2.16063e+08	1.65881e+08	8.05988e+07	7.719e+07	1.30249e+08	1.82063e+08	1.80715e+08	2.01654e+08	9.71942e+07	2.23415e+08	1.87778e+08	3.13486e+08	1.35429e+08	2.73012e+08	1.38439e+08	3.07638e+08	8.15507e+07	1.98097e+08	1.92692e+08	3.18675e+08	8.05988e+07	1.30385e+08	1.36195e+08	3.45153e+08
P13489|RINI_HUMAN;E9PIM9|E9PIM9_HUMAN;H0YCR7|H0YCR7_HUMAN;E9PIK5|E9PIK5_HUMAN	5	5	285.02	0.0104498	0.0054881	2.07688	0.823664	Competition	Control	P13489	167711	186491	228819	555642	240099	409156	447526	473342	440617	870449	571853	909496	383070	613488	295768	239139	192197	303878	135822	237400	174564	732579	225432	709511	553517	968798	721706	2.74294e+06	893660	2.3618e+06	341634	1.17858e+06	295768	403940	200970	576090
P37837|TALDO_HUMAN;F2Z393|F2Z393_HUMAN	3	3	118.51	0.0105962	0.00554322	67.1904	0.822041	Competition	Control	P37837	645.102	1024.36	456.849	294.776	1073.81	3249.1	655.39	5723.1	113185	113780	149173	70615	121458	969.282	59714	8225.56	1136.31	29029.4	522.442	1304	348.527	388.644	1008.21	5634.21	810.612	11713.6	185391	358542	233120	183374	108320	1862.1	59714	13894.1	1188.18	55033.8
Q96TA1|NIBA2_HUMAN	1	1	42.33	0.0106009	0.00554322	21.1347	0.82199	Competition	Control	Q96TA1	5973.79	287.825	842.24	6169.38	82.8141	2358.64	7298.44	6162.69	211424	79928.5	14187.5	13124.6	3798.91	9465.45	4544.13	11858.3	919.428	345.061	4837.93	366.397	642.538	8133.93	77.7552	4090.08	9027	12613.3	346300	251869	22171.3	34082.2	3388	18184.2	4544.13	20030.3	961.399	654.164
P19525|E2AK2_HUMAN;C9JZT2|C9JZT2_HUMAN	3	2	108.12	0.0109421	0.00570923	4.94833	0.818258	Competition	Control	P19525	35593.4	13852.1	27111.9	11196.1	40010.7	31110.8	131611	72541.2	153278	189685	223125	15926.7	51187.8	17128.8	62308.6	29377.8	51735.6	12955.6	28825.7	17633.6	20683.5	14761.3	37566.5	53948.6	162781	148471	251062	597731	348687	41358.8	45650.9	32906.4	62308.6	49623.2	54097.3	24561.2
Q08211|DHX9_HUMAN	9	8	335.85	0.0109846	0.00570988	2.58249	0.817798	Competition	Control	Q08211	193908	248304	192419	234773	207099	107727	455150	746451	506159	190769	568507	591226	283188	504180	308348	101094	217377	349747	157038	316088	146795	309534	194448	186808	562948	1.52777e+06	829061	601149	888430	1.53531e+06	252557	968585	308348	170761	227300	663049
Q14697|GANAB_HUMAN;F5H6X6|F5H6X6_HUMAN	23	8	1359.64	0.0109908	0.00570988	2.31556	0.81773	Competition	Control	Q14697	957791	196687	817765	483640	850869	202313	1.00766e+06	691296	1.22159e+06	1.35497e+06	2.34058e+06	1.50933e+06	1.48925e+06	747238	947568	1.41009e+06	1.06863e+06	917942	775675	250380	623866	637649	798892	350828	1.24631e+06	1.41489e+06	2.0009e+06	4.26976e+06	3.65773e+06	3.91946e+06	1.32816e+06	1.43553e+06	947568	2.38183e+06	1.11741e+06	1.74023e+06
Q5T5C7|Q5T5C7_HUMAN	2	2	86.55	0.0110854	0.00574663	6.55771	0.81671	Competition	Control	Q5T5C7	111684	70138.7	95504.6	72959	100200	133342	424679	918155	661550	196634	1.22758e+06	399975	148272	1.44431e+06	78129.9	112598	81449.2	1.03033e+06	90448	89285.5	72859.7	96191.8	94078.8	231227	525260	1.8792e+06	1.08358e+06	619629	1.9184e+06	1.03866e+06	132234	2.77468e+06	78129.9	190194	85167.4	1.95329e+06
Q8TDB4|HUMMR_HUMAN	1	1	45.65	0.0111528	0.00576914	30.2497	0.815986	Competition	Control	Q8TDB4	0	0	15924.9	40951.4	0	12843	20237.5	60939	757788	495435	690551	84033.9	450875	147.605	83528.6	53184.8	30767.4	23204.7	0	0	12149	53991.9	0	22270.8	25030.5	124725	1.24122e+06	1.56121e+06	1.07915e+06	218221	402105	283.566	83528.6	89836.5	32172	43991.4
A0A0D9SF53|A0A0D9SF53_HUMAN;O15523|DDX3Y_HUMAN;A0A0J9YVQ7|A0A0J9YVQ7_HUMAN;A0A087WVZ1|A0A087WVZ1_HUMAN;A0A2R8YDH3|A0A2R8YDH3_HUMAN;C9J081|C9J081_HUMAN	7	7	288.17	0.0112597	0.00581191	3.0277	0.814844	Competition	Control	A0A0D9SF53	60794.1	16282.5	189450	120869	48078.9	124147	320465	438485	127595	340756	331738	135326	168539	154893	96724.5	229927	189746	94519.9	49234.6	20727.4	144530	159358	45141.9	215282	396364	897455	208993	1.07379e+06	518421	351418	150308	297566	96724.5	388379	198408	179190
P28838|AMPL_HUMAN;H0Y9Q1|H0Y9Q1_HUMAN;H0Y983|H0Y983_HUMAN	10	10	330.71	0.0117799	0.00606741	2.10774	0.809374	Competition	Control	P28838	407561	411592	525040	307889	423630	175902	930186	417585	995688	880766	916387	605214	740899	314981	571437	166013	382437	272934	330067	523950	400549	405932	397752	305029	1.15049e+06	854678	1.63088e+06	2.77545e+06	1.43208e+06	1.57163e+06	660757	605112	571437	280420	399895	517426
H0YE58|H0YE58_HUMAN	1	1	21.86	0.0121387	0.00623885	1.70291	0.805684	Probe	Competition	H0YE58	5.36638e+06	4.77264e+06	3.38057e+06	2.75945e+06	3.60166e+06	3.38e+06	2.75275e+06	2.82782e+06	2.87746e+06	2.49325e+06	3.57468e+06	2.89671e+06	4.36855e+06	4.47841e+06	3.25594e+06	3.5563e+06	6.93974e+06	7.07026e+06	4.34601e+06	6.0755e+06	2.57901e+06	3.63816e+06	3.38165e+06	5.8612e+06	3.40471e+06	5.78775e+06	4.71312e+06	7.85669e+06	5.5863e+06	7.52223e+06	3.89601e+06	8.60351e+06	3.25594e+06	6.00709e+06	7.25654e+06	1.34038e+07
Q15181|IPYR_HUMAN	1	1	59.1	0.0121753	0.00624433	Infinity	0.80531	Competition	Control	Q15181	0	0	0	0	0	0	5323.15	0	0	24485.5	201705	205219	0	0	2934.05	0	0	0	0	0	0	0	0	0	6583.88	0	0	77158.3	315214	532916	0	0	2934.05	0	0	0
K7ENW5|K7ENW5_HUMAN	1	1	48.88	0.0123242	0.00630726	15.4017	0.803801	Competition	Control	K7ENW5	0	76.7285	0	0	0	6754.21	49300.1	44266.4	2594.94	7175.67	460.431	1410.26	45960.8	96.2911	0	28479	23009.6	4495.71	0	97.6743	0	0	0	11712.4	60976.3	90600.8	4250.36	22611.8	719.535	3662.2	40989.3	184.986	0	48105.1	24060	8522.94
Q15233|NONO_HUMAN	2	1	67.62	0.0123738	0.00631921	2.78559	0.8033	Competition	Control	Q15233	8265.97	4799.13	12224.1	29078.6	9997.43	6238.32	19601.3	19742.3	54334.9	21620.4	47518.6	33854.6	32474.4	14996	14888.8	3932.32	6871.71	5114.48	6694.27	6109.22	9325.66	38338.3	9386.72	10817.8	24243.6	40406.9	88997.6	68129.9	74259.4	87914.3	28961.8	28808.9	14888.8	6642.24	7185.4	9696
O75718|CRTAP_HUMAN;C9JP16|C9JP16_HUMAN	3	3	117.46	0.0129689	0.00660907	57.6246	0.79739	Competition	Control	O75718	589.24	2407.53	3482.02	861.732	169.502	395.376	46162.3	184.86	93367	110845	192390	12596.2	6902.22	1082.61	3063.39	6259.93	206.728	318.154	477.201	3064.75	2656.41	1136.14	159.148	685.614	57095.3	378.357	152930	349292	300656	32710	6155.62	2079.82	3063.39	10573.9	216.166	603.154
P69905|HBA_HUMAN;A0A2R8Y7C0|A0A2R8Y7C0_HUMAN;G3V1N2|G3V1N2_HUMAN;P02008|HBAZ_HUMAN	5	5	265.84	0.0131554	0.00668996	3.50866	0.795571	Probe	Competition	P69905	1.18647e+07	1.21727e+07	1.90965e+07	2.28756e+07	7.31425e+06	7.54404e+06	5.74961e+06	5.11127e+06	5.6672e+06	4.75859e+06	4.38284e+06	4.04407e+06	3.69109e+07	3.4423e+07	6.68447e+06	5.18637e+06	1.0371e+07	1.06791e+07	9.6087e+06	1.54957e+07	1.45686e+07	3.01601e+07	6.86745e+06	1.3082e+07	7.11133e+06	1.04613e+07	9.28257e+06	1.49952e+07	6.84926e+06	1.05017e+07	3.29184e+07	6.61303e+07	6.68447e+06	8.76049e+06	1.08444e+07	2.02454e+07
Q96QD8|S38A2_HUMAN;F8VQW8|F8VQW8_HUMAN	2	2	185.86	0.0131981	0.00669751	2.10869	0.795157	Competition	Control	Q96QD8	128984	120516	258307	550292	118028	343773	300015	554428	742282	609018	515193	484061	664889	479746	377978	376272	257628	278701	104459	153415	197060	725525	110818	596131	371070	1.13476e+06	1.21582e+06	1.91913e+06	805114	1.25702e+06	592969	921645	377978	635576	269389	528360
P42785|PCP_HUMAN;E9PIG4|E9PIG4_HUMAN;E9PKN6|E9PKN6_HUMAN;E9PL49|E9PL49_HUMAN;E9PR42|E9PR42_HUMAN	5	5	245.23	0.0135581	0.00686571	4.48732	0.791698	Probe	Control	P42785	75747	57075.2	71250	45686.7	34196.6	338594	196267	56865.3	149440	291804	648798	472789	560529	231169	495657	954495	464848	86876.3	61344.4	72655.9	54356.1	60235	32107.6	587149	242750	116387	244774	919527	1.01391e+06	1.22775e+06	499898	444101	495657	1.61228e+06	486068	164699
A0A0C4DGB6|A0A0C4DGB6_HUMAN;B7WNR0|B7WNR0_HUMAN;A0A087WWT3|A0A087WWT3_HUMAN;H7C013|H7C013_HUMAN	11	11	654.2	0.0136025	0.00687372	1.53585	0.791276	Probe	Competition	A0A0C4DGB6	2.27772e+07	1.64085e+07	2.22974e+07	2.08334e+07	1.69382e+07	1.76248e+07	1.2985e+07	2.21042e+07	1.10177e+07	9.9411e+06	1.24828e+07	1.3134e+07	1.93525e+07	3.23894e+07	1.6435e+07	1.91589e+07	1.49427e+07	2.31465e+07	1.84463e+07	2.08878e+07	1.70105e+07	2.74675e+07	1.59035e+07	3.05628e+07	1.60603e+07	4.52411e+07	1.80464e+07	3.13262e+07	1.95075e+07	3.41067e+07	1.72592e+07	6.22235e+07	1.6435e+07	3.23621e+07	1.56248e+07	4.38809e+07
D6R956|D6R956_HUMAN	1	1	45.25	0.0138541	0.00698615	54.0307	0.788898	Competition	Control	D6R956	0	0	0	0	5501.45	6472.15	120091	211.651	86366.8	131051	137254	171968	0	3131.09	28259.3	0	0	5970.19	0	0	0	0	5165.39	11223.2	148533	433.19	141464	412965	214493	446569	0	6015.17	28259.3	0	0	11318.2
Q96IX5|ATPMD_HUMAN	1	1	71.67	0.0140371	0.00706366	2.92605	0.787184	Competition	Control	Q96IX5	628048	526930	249549	308260	377971	405152	962240	610227	1.50801e+06	1.99713e+06	1.78806e+06	437486	1.1197e+06	275989	931379	902786	547031	656924	508630	670774	190379	406422	354882	702567	1.19014e+06	1.24896e+06	2.47004e+06	6.29331e+06	2.79428e+06	1.13607e+06	998588	530206	931379	1.52493e+06	572003	1.24539e+06
P28066|PSA5_HUMAN	3	3	266.51	0.0140953	0.00707811	7.02618	0.786642	Competition	Control	P28066	25856.2	30897.8	27369.7	25357	29878.8	24065.3	121460	264257	292343	250870	188228	31094.8	152008	18735.3	82438	4150.05	623.261	14695.9	20939.9	39332.4	20880.1	33431.6	28053.6	41731.3	150226	540860	478842	790536	294152	80747.5	135566	35992.6	82438	7010.02	651.713	27860.3
E9PP21|E9PP21_HUMAN;E9PND2|E9PND2_HUMAN;E9PS42|E9PS42_HUMAN	4	4	297.08	0.0142351	0.00713343	3.90479	0.785346	Competition	Control	E9PP21	67252	102178	49498.7	65509.8	168024	308338	385558	292410	130815	725432	691947	744608	111729	445526	195806	193350	37711.8	40713.9	54464.6	130072	37762.2	86370.5	157760	534684	476873	598481	214268	2.28597e+06	1.08133e+06	1.93361e+06	99643.9	855904	195806	326595	39433.3	77185.2
P05388|RLA0_HUMAN;F8VU65|F8VU65_HUMAN;F8VWS0|F8VWS0_HUMAN;F8VPE8|F8VPE8_HUMAN;G3V210|G3V210_HUMAN;F8VQY6|F8VQY6_HUMAN;Q8NHW5|RLA0L_HUMAN;F8VS58|F8VS58_HUMAN;F8VWV4|F8VWV4_HUMAN;F8W1K8|F8W1K8_HUMAN	9	9	588.1	0.0143628	0.00718247	7.49153	0.784169	Competition	Control	P05388	1.18343e+06	733628	1.22663e+06	969291	1.15322e+06	78389.4	6.82744e+06	4.2782e+06	7.63225e+06	4.10062e+06	9.24971e+06	7.95098e+06	3.55721e+06	3.81885e+06	3.34287e+06	51396.9	2.51171e+06	2.27917e+06	958415	933898	935789	1.27795e+06	1.08277e+06	135934	8.44444e+06	8.75627e+06	1.25012e+07	1.29218e+07	1.44549e+07	2.06473e+07	3.17243e+06	7.33643e+06	3.34287e+06	86816.5	2.62637e+06	4.32084e+06
P62899|RL31_HUMAN;B7Z4C8|B7Z4C8_HUMAN;B8ZZK4|B8ZZK4_HUMAN	7	7	265.97	0.0144653	0.00721873	1.81471	0.783229	Probe	Competition	P62899	1.66642e+07	1.40366e+07	1.49843e+07	1.45578e+07	1.39615e+07	1.54331e+07	8.14988e+06	2.05708e+07	4.32762e+06	5.18687e+06	6.12007e+06	6.25337e+06	1.21312e+07	2.78672e+07	1.19207e+07	8.09311e+06	1.16396e+07	2.0188e+07	1.34957e+07	1.78684e+07	1.14314e+07	1.91936e+07	1.31087e+07	2.67622e+07	1.00801e+07	4.21026e+07	7.0884e+06	1.63448e+07	9.5641e+06	1.62389e+07	1.0819e+07	5.35359e+07	1.19207e+07	1.36704e+07	1.21709e+07	3.82723e+07
P31327|CPSM_HUMAN;Q5R211|Q5R211_HUMAN;F8VPD4|F8VPD4_HUMAN	14	14	446.55	0.0145933	0.00726752	6.47053	0.782061	Control	Competition	P31327	4.1111e+06	3.97483e+06	1.6438e+07	1.78311e+07	2.7334e+06	1.12846e+06	1.66492e+06	628380	1.75923e+06	597127	1.50844e+06	984582	2.54297e+07	4.30354e+06	2.43046e+06	2.08102e+06	3.20677e+06	3.27728e+06	3.32941e+06	5.0599e+06	1.25405e+07	2.35092e+07	2.56643e+06	1.95683e+06	2.05924e+06	1.28612e+06	2.88153e+06	1.88166e+06	2.35731e+06	2.55678e+06	2.2679e+07	8.26756e+06	2.43046e+06	3.51513e+06	3.35316e+06	6.21304e+06
P00367|DHE3_HUMAN;P49448|DHE4_HUMAN	6	6	255.61	0.0146833	0.0072972	2.63005	0.781244	Competition	Control	P00367	196735	145280	100033	161171	76394.6	42168.3	258249	161039	269786	580562	386594	242092	325589	294705	107054	116048	90531.9	151664	159327	184940	76314.3	212493	71727.8	73123.4	319413	329600	441895	1.82946e+06	604147	628668	290371	566160	107054	196021	94664.7	287523
A0A0J9YVP6|A0A0J9YVP6_HUMAN;A0A0J9YVR6|A0A0J9YVR6_HUMAN;E9PN18|E9PN18_HUMAN;H0YCP8|H0YCP8_HUMAN	3	3	138.68	0.0148377	0.00735873	29.3563	0.779849	Competition	Probe	A0A0J9YVP6	2626.32	1809.61	0	502.14	0	5836.73	21401.4	3755.45	39452.3	17794.9	24111.8	16399	0	247.819	2146.97	0	1788.76	3.44437	2126.95	2303.61	0	662.041	0	10121.4	26470.1	7686.33	64620.7	56075	37680.5	42585.3	0	476.088	2146.97	0	1870.42	6.52981
P50416|CPT1A_HUMAN	2	2	54.9	0.0149173	0.00738302	3.39845	0.779133	Control	Probe	P50416	279246	197804	1.22381e+06	802452	499908	159219	585788	197804	406261	167150	410342	122193	90543.6	93065	644159	48401.6	27214	27171.8	226150	251801	933638	1.05798e+06	469370	276100	724526	404850	665433	526721	641259	317313	80749.7	178788	644159	81757.1	28456.3	51512.1
Q9Y6N5|SQOR_HUMAN;H3BNX3|H3BNX3_HUMAN;A0A1B0GXB4|A0A1B0GXB4_HUMAN;H3BNP9|H3BNP9_HUMAN	10	10	465.59	0.0149533	0.00738562	17.4756	0.778811	Competition	Probe	Q9Y6N5	6274.92	9473.38	33443.1	5940.14	11625.3	38653	35176.2	4244.16	317035	95497.5	121698	676331	22045.6	8989.45	21442.6	7762.35	8190.45	3096.86	5081.8	12059.5	25513.5	7831.69	10915.1	67027.5	43507.3	8686.6	519286	300930	190183	1.75631e+06	19661	17269.7	21442.6	13111.7	8564.34	5871
Q8WWI5|CTL1_HUMAN	1	1	41.05	0.0152427	0.00751315	14.8004	0.776233	Probe	Control	Q8WWI5	0	3427.83	4192.78	19289.7	0	5924.25	14464.6	8624.85	136491	192590	20496	21227.2	134980	88514.2	5724.18	117825	23686.7	115234	0	4363.58	3198.64	25432.3	0	10273.1	17890.4	17652.6	223564	606886	32030	55123.1	120379	170045	5724.18	199023	24768	218459
P61009|SPCS3_HUMAN	2	2	81.11	0.0154178	0.0075839	3.19908	0.77469	Competition	Control	P61009	71909.3	75829.5	37195.5	50065.6	33655.5	30605.5	110621	52264.1	135494	111607	164440	382933	74715.3	44628.9	35538.5	119917	150962	54575.5	58236.4	96529.9	28376.2	66008.3	31599.6	53072.4	136820	106970	221931	351694	256978	994406	66633.5	85736.9	35538.5	202557	157854	103464
A0A2R8Y811|A0A2R8Y811_HUMAN;E5RH77|E5RH77_HUMAN	6	6	343.59	0.0156052	0.00766042	1.55915	0.773049	Competition	Control	A0A2R8Y811	1.81424e+06	1.69691e+06	1.93914e+06	2.89143e+06	2.00382e+06	1.36263e+06	2.58585e+06	3.10694e+06	2.85431e+06	4.45745e+06	3.10397e+06	2.14624e+06	2.71486e+06	3.42117e+06	2.26401e+06	1.89356e+06	2.19525e+06	2.46959e+06	1.46928e+06	2.16015e+06	1.47935e+06	3.81217e+06	1.88141e+06	2.36291e+06	3.19828e+06	6.35902e+06	4.6752e+06	1.40462e+07	4.85071e+06	5.57339e+06	2.4212e+06	6.57244e+06	2.26401e+06	3.19849e+06	2.29546e+06	4.68184e+06
Q9NYU2|UGGG1_HUMAN;H7BZG0|H7BZG0_HUMAN	2	2	79.37	0.01592	0.00778797	24.8271	0.770323	Competition	Probe	Q9NYU2	8015.63	4497.27	1049.53	48406.4	2194.08	22234.9	14928.3	1.41363e+06	41684.1	82295.9	12387	137093	5626.63	1782.89	4382.07	46314.8	4456.71	5991.89	6491.53	5724.97	800.676	63820.8	2060.05	38557.2	18463.9	2.89331e+06	68276.3	259329	19357.6	356005	5018.01	3425.14	4382.07	78232.1	4660.16	11359.4
P28300|LYOX_HUMAN	6	6	385.56	0.0159411	0.00778797	16.6368	0.770141	Competition	Control	P28300	37025	19376	44190.6	36158.4	15285.2	71220.2	497666	19005.7	289614	202831	687919	2.01722e+06	83107.6	803903	46169.2	203489	75461.2	1.04129e+06	29985	24665.4	33712.7	47672.5	14351.5	123502	615533	38899.3	474372	639157	1.07504e+06	5.23835e+06	74118	1.54438e+06	46169.2	343721	78906.1	1.97407e+06
A0A2R8Y478|A0A2R8Y478_HUMAN	2	2	152.33	0.0159622	0.00778797	3.72913	0.76996	Competition	Control	A0A2R8Y478	328811	456875	290216	266138	428438	382391	1.08726e+06	515929	2.97903e+06	1.20653e+06	1.87126e+06	368314	1.20771e+06	250185	957042	575813	750220	422169	266290	581595	221404	350886	402266	663097	1.34476e+06	1.05596e+06	4.87949e+06	3.80199e+06	2.9243e+06	956444	1.07707e+06	480632	957042	972628	784468	800346
Q14566|MCM6_HUMAN	2	2	77.47	0.0162416	0.00790826	2.41374	0.767573	Competition	Probe	Q14566	81246.6	157543	107675	124174	70780.9	43789	54809	208491	149163	102495	224054	109168	52895.8	45819.2	57864.1	56410.4	55836.8	82570.3	65798.3	200550	82144.5	163715	66457.1	75933.7	67789.9	426723	244321	322982	350139	283490	47174.2	88023.6	57864.1	95284.9	58385.7	156536
A0A0A0MSW4|A0A0A0MSW4_HUMAN;B3KYB6|B3KYB6_HUMAN;B3KYB7|B3KYB7_HUMAN	6	6	172.33	0.0163486	0.0079443	7.66584	0.766665	Competition	Control	A0A0A0MSW4	14320.1	12512.4	17441	9412.5	9126.61	114083	97177.2	24752.6	357197	37122.3	634283	205520	43116.8	22465.2	55231.3	192240	22177.5	27587	11597.2	15928.1	13305.6	12409.8	8569.09	197829	120193	50661.6	585070	116979	991222	533698	38453	43158.1	55231.3	324720	23190	52299.3
P45974|UBP5_HUMAN	3	3	120.74	0.0167776	0.0081363	4.92163	0.763068	Control	Competition	P45974	1.06566e+07	4.61781e+07	6.6953e+06	1.12946e+07	1.10835e+07	3.54828e+07	2.59498e+06	5.67289e+06	3.67314e+06	4.94749e+06	2.6241e+06	5.15219e+06	2.2915e+06	5.02006e+06	5.82498e+06	1.89118e+07	1.64791e+07	2.69281e+07	8.63036e+06	5.87841e+07	5.10779e+06	1.48913e+07	1.04065e+07	6.15302e+07	3.20957e+06	1.16108e+07	6.01641e+06	1.55904e+07	4.10079e+06	1.33793e+07	2.04364e+06	9.64407e+06	5.82498e+06	3.19447e+07	1.72314e+07	5.10501e+07
Q13325|IFIT5_HUMAN	1	1	42.04	0.017449	0.00844487	16.7686	0.757556	Competition	Control	Q13325	4723.76	1980.39	1955.84	1211.62	0	5174.51	23407.3	4643.59	47139.5	78778.2	58814.2	39519.7	18478.4	8794.39	13469.3	4181.69	17378.2	11855.1	3825.58	2521.01	1492.09	1597.44	0	8973.02	28951	9504.11	77212	248244	91911.4	102625	16479.7	16895	13469.3	7063.45	18171.5	22474.8
J3QRU4|J3QRU4_HUMAN	1	1	36.8	0.0176519	0.00852592	10.3205	0.755917	Competition	Control	J3QRU4	0	7021.5	0	0	4249.59	0	5421.92	16231.9	54429.8	4119.79	25538.4	10582	0	0	9137.33	902.021	4490.37	0	0	8938.27	0	0	3990	0	6706.04	33222.1	89153	12982.2	39910	27479.6	0	0	9137.33	1523.64	4695.35	0
P13647|K2C5_HUMAN;F8W0C6|F8W0C6_HUMAN;H0YI76|H0YI76_HUMAN;H0YIN9|H0YIN9_HUMAN;F8VV57|F8VV57_HUMAN;F8VUG2|F8VUG2_HUMAN;F8VU69|F8VU69_HUMAN	28	15	1620.63	0.0177667	0.00856416	2.19336	0.754996	Control	Competition	P13647	7.43449e+06	5.5576e+06	6.69784e+06	7.11939e+06	7.43869e+06	4.00473e+06	3.89779e+06	6.16242e+06	2.27752e+06	1.86012e+06	1.90238e+06	1.34005e+06	1.06039e+07	7.18601e+06	4.26404e+06	1.70747e+06	5.89344e+06	5.04686e+06	6.02089e+06	7.07475e+06	5.10973e+06	9.38646e+06	6.98428e+06	6.94454e+06	4.82094e+06	1.26127e+07	3.73045e+06	5.86157e+06	2.97293e+06	3.47986e+06	9.45688e+06	1.38051e+07	4.26404e+06	2.88415e+06	6.16248e+06	9.5678e+06
A0A087X163|A0A087X163_HUMAN;H0Y6T8|H0Y6T8_HUMAN;Q5W0J0|Q5W0J0_HUMAN	3	3	95.41	0.01782	0.00856927	34.5363	0.75457	Competition	Control	A0A087X163	6725.54	474.39	9266.22	1216.02	4050.17	603.459	16570.8	2559.66	393407	31179.1	312071	15609.2	6198.65	4383.49	23643	2023.36	14513.1	424.137	5446.74	603.891	7069.13	1603.25	3802.76	1046.45	20495.4	5238.9	644378	98251.1	487686	40534.1	5528.16	8421.16	23643	3417.74	15175.6	804.077
O14933|UB2L6_HUMAN	2	2	44.21	0.0178485	0.00856927	4.21127	0.754342	Competition	Control	O14933	1368.46	5492.84	2908.49	3551.12	2085.02	4372.94	4852.04	2953.44	19908.4	17755.3	20453.7	17371.2	446.466	1086.58	9698.73	1481.67	1823.46	9180.06	1108.26	6992.31	2218.87	4681.93	1957.65	7583.04	6001.19	6044.86	32608.9	55950.2	31963.9	45109.9	398.172	2087.43	9698.73	2502.75	1906.7	17403.5
Q9H845|ACAD9_HUMAN;H0Y8Z9|H0Y8Z9_HUMAN	6	6	224.45	0.0183166	0.00877646	5.12828	0.750638	Competition	Control	Q9H845	18592.6	31536.8	9960.88	11817.7	25205	70615.2	109815	13241.5	73545.3	161266	219392	282898	45133.7	13858.1	39841.4	70899.7	30332.1	42074.2	15057.4	40145.9	7599.08	15580.8	23665.3	122453	135823	27101.7	120463	508179	342853	734635	40251.7	26622.9	39841.4	119760	31716.7	79764
Q5QNZ2|Q5QNZ2_HUMAN	3	3	159.31	0.0183697	0.00878441	9.08908	0.750221	Competition	Control	Q5QNZ2	3355.46	45677.1	1648.5	33982.4	5197.82	19662.5	114929	11014.6	263802	75867.9	210610	319247	4373.95	30818.3	43664.2	37240.2	524.812	15431.6	2717.45	58146.3	1257.63	44803.7	4880.3	34096.5	142149	22543.8	432094	239074	329129	829026	3900.83	59205.3	43664.2	62904	548.769	29255.1
Q15393|SF3B3_HUMAN	1	1	36.7	0.0185661	0.00886072	90.633	0.748689	Competition	Control	Q15393	543.818	584.754	114.886	58.9482	0	281.968	20403.2	7163.66	1305.41	8793.72	96216	9714.6	25117.2	34.1937	22085.7	71.5543	21483.1	48.9695	440.415	744.383	87.646	77.7194	0	488.956	25235.4	14662	2138.19	27710.6	150361	25227.1	22400.3	65.6898	22085.7	120.865	22463.8	92.836
H0Y2W2|H0Y2W2_HUMAN;Q5T9A4|ATD3B_HUMAN;Q5SV16|Q5SV16_HUMAN	5	5	275.98	0.0188185	0.00896341	2.4604	0.746735	Competition	Probe	H0Y2W2	46020	58629.4	19734.4	70472.1	36931.7	152035	69942.4	134971	213762	214089	95505.3	164138	18349.8	35742.3	41008.5	199832	43170.2	24604.8	37269.7	74634.4	15055.2	92913	34675.6	263641	86507.4	276247	350130	674633	149250	426236	16365	68664.9	41008.5	337544	45141	46645.6
B1AHC9|B1AHC9_HUMAN	10	10	450.31	0.0189034	0.00898605	4.30281	0.746082	Competition	Control	B1AHC9	200656	178704	48115.1	249142	188116	66548.3	375013	787006	1.16037e+06	144840	850181	689715	319885	86325	251807	408546	46681.1	449325	162503	227488	36706.6	328478	176624	115400	463831	1.61078e+06	1.90062e+06	456418	1.32861e+06	1.79107e+06	285284	165840	251807	690091	48812	851828
P18669|PGAM1_HUMAN;P15259|PGAM2_HUMAN;Q8N0Y7|PGAM4_HUMAN	9	9	506.77	0.0192992	0.00915609	4.73528	0.743064	Competition	Control	P18669	426938	48118.9	431004	530463	371168	55533.8	1.18674e+06	976224	2.12937e+06	251441	1.76227e+06	2.51684e+06	994247	903163	638271	121287	727487	449172	345760	61254.7	328810	699382	348494	96300.2	1.4678e+06	1.99805e+06	3.4878e+06	792336	2.75397e+06	6.53579e+06	886702	1.73508e+06	638271	204871	760697	851537
P53618|COPB_HUMAN;E9PP73|E9PP73_HUMAN	8	8	373.76	0.0202414	0.00958421	7.55208	0.736043	Competition	Control	P53618	42295.8	35931.6	7430.85	34673.1	30612	47099.9	220526	86865.6	306824	436460	363336	81628.1	150498	123813	134816	19816.8	2111.27	69516.5	34253.6	45740.5	5668.94	45714.3	28742	81675.1	272755	177789	502562	1.37536e+06	567800	211973	134219	237859	134816	33473.3	2207.65	131789
O15145|ARPC3_HUMAN	1	1	41.71	0.0204082	0.00962664	6.83608	0.734824	Competition	Control	O15145	24204.9	0	0	12398.3	7017.89	0	16820.7	8565.95	111275	1828.08	137717	21990.9	19725.8	20394.3	8910.63	12916.9	9839.82	12672	19602.6	0	0	16346.3	6589.19	0	20804.5	17532.1	182262	5760.63	215216	57106.5	17592.1	39179.7	8910.63	21818.4	10289	24023.4
K7ERG4|K7ERG4_HUMAN	1	1	38.59	0.0204111	0.00962664	2.38334	0.734803	Competition	Control	K7ERG4	44363.7	115591	178901	146617	68361.6	137350	189708	304987	160068	314752	306535	371276	182512	348432	176016	79933.1	56860.7	101368	35928.3	147145	136482	193305	64185.6	238176	234638	624222	262182	991841	479036	964137	162770	669376	176016	135018	59456.4	192174
Q10472|GALT1_HUMAN	2	2	84.3	0.0205324	0.00965796	6.70558	0.73392	Competition	Control	Q10472	12484.1	4483.93	2688.41	23054	4478.15	276.63	53515.4	6225.28	90317.3	43167.2	83550.6	41505.8	2031.3	55683.3	7717.47	13087.5	11391.8	40769.1	10110.3	5707.98	2050.97	30395.2	4204.6	479.698	66189.9	12741.4	147935	136028	130568	107783	1811.58	106974	7717.47	22106.6	11911.8	77289.9
I3L397|I3L397_HUMAN;Q6IS14|IF5AL_HUMAN;C9J4W5|C9J4W5_HUMAN	6	5	206.05	0.0205718	0.00965796	4.3401	0.733635	Competition	Control	I3L397	100860	149806	16651	138036	135807	75578.5	562106	54318.2	695853	291731	691754	380948	385909	184018	312564	120715	159730	253335	81682.1	190701	12702.9	181992	127511	131059	695234	111174	1.13977e+06	919297	1.08103e+06	989253	344166	353520	312564	203905	167022	480271
K7EL20|K7EL20_HUMAN;K7EP16|K7EP16_HUMAN	2	2	65.32	0.020603	0.00965796	13.8259	0.733409	Competition	Control	K7EL20	13968.3	8367.67	8616.57	4215.7	7099.16	3273.27	57669.9	3153.45	135086	18004.4	164855	250872	71327	11634.6	29613.3	16153.8	37938.7	8427.5	11312.4	10651.9	6573.51	5558.13	6665.49	5676.12	71328.3	6454.21	221264	56735.3	257626	651469	63611.7	22351.4	29613.3	27286	39670.6	15976.8
P46940|IQGA1_HUMAN;A0A0J9YXZ5|A0A0J9YXZ5_HUMAN;H0YLE8|H0YLE8_HUMAN;H0YKA5|H0YKA5_HUMAN;A0A087WWP1|A0A087WWP1_HUMAN;A0A087X225|A0A087X225_HUMAN;F2Z2E2|F2Z2E2_HUMAN	21	20	939.03	0.0206381	0.00965796	3.63003	0.733155	Probe	Control	P46940	193861	273987	206947	932117	239929	679238	712451	1.37284e+06	1.01968e+06	911348	1.22074e+06	1.04058e+06	399669	538589	720760	5.33239e+06	803319	1.375e+06	157000	348781	157878	1.22894e+06	225272	1.17785e+06	881187	2.80981e+06	1.67017e+06	2.87182e+06	1.9077e+06	2.7022e+06	356438	1.03469e+06	720760	9.00715e+06	839991	2.60672e+06
Q9NX47|MARH5_HUMAN	1	1	115.26	0.0208392	0.00973313	23.2957	0.731705	Competition	Control	Q9NX47	138.976	0	0	0	378.336	5149.63	2553.27	2701.76	33379.1	83570.4	7657.76	2152.93	3714.62	2322.78	3737.59	28065.7	21772.5	0	112.551	0	0	0	355.224	8929.88	3157.98	5529.75	54673.2	263346	11967.1	5590.77	3312.82	4462.32	3737.59	47407	22766.4	0
O60506|HNRPQ_HUMAN;B7Z645|B7Z645_HUMAN;F6UXX1|F6UXX1_HUMAN	5	3	192.56	0.020982	0.00978085	15.8645	0.730681	Competition	Control	O60506	12347.5	7565.15	3630.82	14730.7	21596.9	8287.39	179264	6782.25	233630	8791.58	337168	315661	31849.5	10510.4	30750.4	6937.93	25279.5	23242	9999.71	9630.32	2769.92	19421.5	20277.6	14371	221720	13881.3	382674	27703.9	526906	819713	28404.4	20191.6	30750.4	11719.1	26433.6	44062
P63104|1433Z_HUMAN;E7EX29|E7EX29_HUMAN;B0AZS6|B0AZS6_HUMAN;E7ESK7|E7ESK7_HUMAN;B7Z2E6|B7Z2E6_HUMAN;E5RGE1|E5RGE1_HUMAN;P31947|1433S_HUMAN	12	9	746.75	0.0210254	0.0097821	4.0955	0.730372	Competition	Control	P63104	958216	670500	894548	1.10592e+06	983531	392264	3.88384e+06	3.75136e+06	5.73071e+06	420814	5.85875e+06	852427	4.22914e+06	3.38727e+06	3.48431e+06	1.0897e+06	2.50151e+06	2.59199e+06	776020	853537	682444	1.45808e+06	923450	680218	4.80369e+06	7.67796e+06	9.38659e+06	1.32606e+06	9.15572e+06	2.2136e+06	3.77169e+06	6.50731e+06	3.48431e+06	1.84065e+06	2.61571e+06	4.91388e+06
Q12797|ASPH_HUMAN;E5RG29|E5RG29_HUMAN;A0A087WUJ2|A0A087WUJ2_HUMAN;E5RHJ2|E5RHJ2_HUMAN	3	2	128.17	0.0216356	0.0100316	32.74	0.726057	Competition	Control	Q12797	0	0	1806.34	3184.18	17084.7	30758.9	160439	42568	173899	5649.86	1.29347e+06	53765.4	55769.4	31106.1	3134.45	4256.29	33715.1	14703.6	0	0	1378.04	4198.14	16041	53338.4	198437	87124.5	284837	17803.7	2.02135e+06	139619	49736.9	59758.2	3134.45	7189.47	35254.1	27875
F5H365|F5H365_HUMAN;A0A2R8YFH5|A0A2R8YFH5_HUMAN;G3V1W4|G3V1W4_HUMAN	4	4	195.17	0.0216449	0.0100316	5.28256	0.725992	Competition	Control	F5H365	32597.8	20055.4	26263.4	8632.23	29079	19409.9	166680	70485.8	140877	12382.8	204775	123427	23506.6	10588.3	89273.1	59109.8	65026.9	42577.5	26399.6	25530.2	20036.1	11381	27302.7	33658.4	206157	144264	230749	39020.4	320011	320517	20964	20341.3	89273.1	99844.6	67995.4	80718.2
P23246|SFPQ_HUMAN;C9IZL7|C9IZL7_HUMAN;H0Y9K7|H0Y9K7_HUMAN	4	3	110.25	0.0221121	0.0102283	5.27403	0.722748	Competition	Control	P23246	15834.5	14046	15290	33377.8	8761.35	10754.2	72426.4	4351.22	111279	113594	97262.9	118277	43847.9	17062.6	18473.7	3576.6	12146.9	7182.41	12823.7	17880.3	11664.6	44006.5	8226.14	18648.6	89579.7	8905.71	182269	357957	151997	307143	39105	32779.1	18473.7	6041.37	12701.4	13616.4
Q9UBG0|MRC2_HUMAN	2	2	67.32	0.0222199	0.0102513	6.03643	0.722006	Probe	Control	Q9UBG0	0	0	0	438.327	2.27019	12492.3	324.094	9063.11	5654.6	19307.6	8867.62	1547.69	7389.27	18320.3	33406.8	0	3516.36	15435.6	0	0	0	577.906	2.13151	21662.6	400.852	18549.6	9261.92	60841.7	13857.8	4019.07	6589.99	35195.3	33406.8	0	3676.88	29262.7
P28482|MK01_HUMAN	1	1	45.7	0.0222469	0.0102513	6.22755	0.721821	Competition	Control	P28482	2062.35	8774.55	23013.3	76803.5	3645	7899.49	148812	50650.3	133343	38766.2	201364	188061	82738.3	92029.7	20417.6	87177.7	8407.22	1085.74	1670.21	11169.9	17556.7	101261	3422.34	13698.4	184056	103667	218408	122159	314680	488359	73788.7	176799	20417.6	147255	8791.01	2058.34
F8W696|F8W696_HUMAN	1	1	34.6	0.0223348	0.0102721	2.20361	0.721218	Control	Competition	F8W696	173667	230390	198148	212702	174060	268989	80225	159616	87911.1	125138	75558.1	42412.3	80664.6	168881	143314	300221	210586	49053.1	140646	293284	151166	280434	163427	466448	99225.4	326690	143994	394332	118078	110137	71939.3	324440	143314	507115	220199	92994.5
A0A087WUL9|A0A087WUL9_HUMAN	3	3	61.27	0.0223906	0.0102781	2.10717	0.720837	Probe	Control	A0A087WUL9	302205	325493	362948	410677	382319	149743	445275	588200	835500	326621	521304	208791	557537	522229	682747	1.2411e+06	460912	609433	244743	414349	276890	541452	358964	259667	550734	1.20388e+06	1.3685e+06	1.02924e+06	814664	542193	497229	1.00326e+06	682747	2.0964e+06	481953	1.15536e+06
P61158|ARP3_HUMAN;B4DXW1|B4DXW1_HUMAN;F8WDR7|F8WDR7_HUMAN;F8WE84|F8WE84_HUMAN	5	5	194.67	0.0231058	0.0105862	3.03645	0.716004	Competition	Control	P61158	442089	391570	208406	40759.1	224583	23410.9	656169	433359	797494	640904	841190	671842	580718	474013	378517	64051.1	403278	406989	358030	498463	158991	53738.3	210864	40596.4	811575	886964	1.30625e+06	2.01961e+06	1.31456e+06	1.74465e+06	517903	910631	378517	108191	421688	771567
C9JFK9|C9JFK9_HUMAN	1	1	108.3	0.0234335	0.010716	17.1864	0.713825	Competition	Control	C9JFK9	4405.76	2915.58	11166.6	0	0	0	65426.7	29591.5	56284.2	8917.27	77345.8	80174.8	0	10395	2937.63	0	0	12483.4	3568.04	3711.49	8518.9	0	0	0	80922.2	60565.5	92190.5	28099.9	120872	208199	0	19969.9	2937.63	0	0	23665.9
P62070|RRAS2_HUMAN;E9PK85|E9PK85_HUMAN;P10301|RRAS_HUMAN;E9PQC5|E9PQC5_HUMAN	3	3	160.04	0.0236506	0.0107947	4.85168	0.712394	Competition	Probe	P62070	34088.1	56571.5	18688.9	7830.8	18257.7	35678.4	101642	32842.7	16396.7	376602	107016	166080	26124.8	25826	27787.8	22016.4	42782.9	20473.1	27606.5	72014.7	14257.6	10324.4	17142.4	61869.2	125715	67219.7	26856.9	1.18674e+06	167239	431280	23298.9	49614.5	27787.8	37188.8	44735.9	38812.7
Q9P0L0|VAPA_HUMAN;J3QKM9|J3QKM9_HUMAN	4	3	294.49	0.0239359	0.0109042	5.64522	0.710527	Competition	Probe	Q9P0L0	83126.9	8804.8	109681	527498	54713.4	11019.7	136937	80634.9	313310	254140	417283	206244	20787.9	66218.2	86977.7	8337.58	31121.5	36069	67321	11208.4	83675.1	695472	51371.1	19109	169369	165037	513185	800842	652106	535577	18539.3	127212	86977.7	14083.3	32542.2	68379.4
P60842|IF4A1_HUMAN;J3KT12|J3KT12_HUMAN;J3KTB5|J3KTB5_HUMAN;J3KSZ0|J3KSZ0_HUMAN;J3QL43|J3QL43_HUMAN;E7EQG2|E7EQG2_HUMAN;J3KTN0|J3KTN0_HUMAN;J3QR64|J3QR64_HUMAN;J3QLN6|J3QLN6_HUMAN;J3KS25|J3KS25_HUMAN;E7EMV8|E7EMV8_HUMAN;I3L3H2|I3L3H2_HUMAN;E9PBH4|E9PBH4_HUMAN;J3QL52|J3QL52_HUMAN	15	13	1226.99	0.0239899	0.0109081	3.21593	0.710176	Competition	Control	P60842	1.49935e+06	507413	995144	471019	1.16874e+06	267200	3.21266e+06	1.09586e+06	2.68533e+06	1.5054e+06	4.84917e+06	2.43813e+06	2.12448e+06	219411	2.03018e+06	1.17684e+06	1.07163e+06	1.46679e+06	1.21426e+06	645930	759188	621008	1.09735e+06	463347	3.97355e+06	2.24291e+06	4.39842e+06	4.74378e+06	7.578e+06	6.33137e+06	1.89468e+06	421512	2.03018e+06	1.98784e+06	1.12055e+06	2.78072e+06
A0A0C4DGI3|A0A0C4DGI3_HUMAN;H0YIC4|H0YIC4_HUMAN;F8VPA1|F8VPA1_HUMAN	7	6	255.79	0.0240369	0.0109089	4.40772	0.70987	Control	Competition	A0A0C4DGI3	1.70216e+07	7.4071e+07	1.00114e+07	1.78421e+07	1.73531e+07	5.36534e+07	4.13842e+06	1.03891e+07	6.06035e+06	9.27667e+06	4.64409e+06	8.58687e+06	3.90279e+06	1.07297e+07	1.04683e+07	3.81704e+07	2.59605e+07	4.2111e+07	1.37851e+07	9.42914e+07	7.63765e+06	2.35237e+07	1.62931e+07	9.30395e+07	5.11856e+06	2.12635e+07	9.92652e+06	2.92325e+07	7.25753e+06	2.22985e+07	3.48064e+06	2.06128e+07	1.04683e+07	6.44751e+07	2.71456e+07	7.98337e+07
A0A0B4J2B5|A0A0B4J2B5_HUMAN	1	1	103.11	0.0243661	0.0110375	21.3059	0.707742	Control	Probe	A0A0B4J2B5	10402.2	340506	48813.8	39342.2	72573.5	1.83249e+06	2192.72	2543.36	1473.87	24430.4	4529.57	134257	5280.73	32309.3	10425.9	10518.1	9120.03	42368.6	8424.29	433460	37239.7	51870.3	68140.2	3.1777e+06	2712.04	5205.54	2414.13	76984.7	7078.55	348642	4709.53	62069.7	10425.9	17766.5	9536.36	80322
Q99832|TCPH_HUMAN;F8WAM2|F8WAM2_HUMAN;A0A0D9SG95|A0A0D9SG95_HUMAN	12	12	525.65	0.0263061	0.0118458	9.75735	0.695607	Competition	Probe	Q99832	45094	29065.8	13115.2	36999.7	30345.2	50600.6	263465	36201.3	615846	694038	10736.9	272668	11463.2	14789	62047.3	37616.5	26897.9	41189	36519.8	37000.3	10005.5	48781.8	28491.5	87745.6	325863	74093.8	1.00872e+06	2.18704e+06	16779.1	708070	10223.2	28411.3	62047.3	63539.5	28125.8	78085.8
P07814|SYEP_HUMAN;V9GYZ6|V9GYZ6_HUMAN;V9GZ76|V9GZ76_HUMAN	9	8	355.55	0.02633	0.0118458	7.10827	0.695461	Competition	Control	P07814	9054.52	6165.97	8708.29	2605.06	6290.49	36325.7	37471.6	18546.2	21989	168008	35194.6	210328	12443.7	4400.9	17923.2	135135	8057.03	3019.47	7332.88	7849.2	6643.49	3434.6	5906.22	62991.8	46346.3	37958.8	36016.8	529423	55000.2	546183	11097.7	8454.61	17923.2	228261	8424.83	5724.29
P24752|THIL_HUMAN;E9PRQ6|E9PRQ6_HUMAN	2	2	111.05	0.0263374	0.0118458	7.58185	0.695416	Competition	Control	P24752	44099.6	16987.2	17541.1	13884.8	21670.3	19720.8	167599	5430.05	254464	157728	270719	159299	129662	27244.9	89696	40402.4	49040.3	58070.4	35714.5	21624.5	13381.9	18306.3	20346.5	34197.5	207293	11113.8	416797	497030	423065	413669	115637	52340.5	89696	68245.2	51279	110089
A0A0A6YYJ8|A0A0A6YYJ8_HUMAN;B8ZZ12|B8ZZ12_HUMAN	5	3	190.46	0.0263475	0.0118458	2.65025	0.695355	Probe	Competition	A0A0A6YYJ8	567513	339267	697744	622534	778042	136539	282330	626715	214267	114072	303978	55912.6	490336	305312	648100	1.01494e+06	780450	994042	459605	431882	532303	820772	730514	236770	349197	1.28271e+06	350957	359462	475039	145195	437298	586537	648100	1.71437e+06	816077	1.8845e+06
Q5T948|Q5T948_HUMAN	1	1	34.64	0.0264302	0.0118608	43.0461	0.694853	Competition	Control	Q5T948	4341.68	0	3111.06	0	3484.75	120.92	35910.6	7727.02	119133	117405	70419.9	125426	16432.7	48593.3	13602.4	0	5435.67	7263.35	3516.15	0	2373.4	0	3271.88	209.684	44415.6	15815	195134	369964	110048	325709	14655.2	93353	13602.4	0	5683.81	13769.8
P27824|CALX_HUMAN;D6RGY2|D6RGY2_HUMAN;H0Y9Q7|H0Y9Q7_HUMAN;D6RAU8|D6RAU8_HUMAN;D6RFL1|D6RFL1_HUMAN;H0Y9H1|H0Y9H1_HUMAN;D6RAQ8|D6RAQ8_HUMAN;D6RD16|D6RD16_HUMAN	16	11	991.3	0.0266481	0.0119363	4.00882	0.693536	Competition	Control	P27824	1.65907e+06	1.55267e+06	1.15568e+06	1.73044e+06	1.03644e+06	311574	3.48182e+06	1.4874e+06	3.95862e+06	995426	9.04825e+06	1.08777e+07	2.12385e+06	1.5735e+06	1.52748e+06	855335	1.89382e+06	1.70838e+06	1.34362e+06	1.97652e+06	881657	2.28148e+06	973126	540295	4.30644e+06	3.0443e+06	6.484e+06	3.13677e+06	1.41401e+07	2.82473e+07	1.89412e+06	3.02287e+06	1.52748e+06	1.44478e+06	1.98027e+06	3.23874e+06
E7ESS4|E7ESS4_HUMAN	2	2	77.42	0.0267626	0.0119654	7.5806	0.692846	Competition	Control	E7ESS4	16966.3	8443.99	11437.6	6283.31	14290.8	15937.8	56906.3	13370.8	100402	313094	61548.2	10790.5	26315.9	44367	14628.5	40141.9	18145.7	9959.93	13740.3	10749.1	8725.67	8284.15	13417.8	27637.4	70383.9	27366.3	164452	986615	96184.1	28020.8	23469.4	85233.9	14628.5	67805.3	18974	18882
P32119|PRDX2_HUMAN;A6NIW5|A6NIW5_HUMAN	5	4	264.28	0.0269791	0.0120398	4.3723	0.69155	Competition	Control	P32119	73539.3	173851	57018.5	60616.6	71864.9	25641.7	191817	512623	376738	32089	301911	607151	151131	211395	132102	67960.4	142313	108607	59556.5	221310	43499	79919.2	67474.9	44464.8	237246	1.04919e+06	617077	101118	471809	1.57666e+06	134784	406112	132102	114795	148810	205896
A0A1W2PNV4|A0A1W2PNV4_HUMAN	3	3	129.32	0.0272607	0.0121429	4.0797	0.689874	Competition	Control	A0A1W2PNV4	61450.8	16858.6	83370.1	135589	76989	52511.5	339422	116180	325489	203271	469644	287085	247372	45635.8	172657	209637	68727	7625.22	49766.5	21460.8	63602.4	178766	72286	91059.3	419811	237787	533133	640543	733933	745508	220615	87671.4	172657	354107	71864.3	14455.8
B4DP62|B4DP62_HUMAN	2	2	54.91	0.0273472	0.0121589	13.1117	0.689362	Competition	Control	B4DP62	6615.69	5832.54	6225.01	270.495	342.859	1511.47	4922.13	10569.7	64665.7	126526	63586.4	2428.07	1354.04	19449.9	4603.27	962.211	2553.27	7143.7	5357.77	7424.74	4749.01	356.631	321.915	2621.01	6087.88	21633.3	105919	398706	99369.2	6305.25	1207.58	37365.4	4603.27	1625.31	2669.83	13543
G3XAM7|G3XAM7_HUMAN;E5RIB1|E5RIB1_HUMAN;E5RG03|E5RG03_HUMAN;E5RJ41|E5RJ41_HUMAN;E5RGY6|E5RGY6_HUMAN	5	4	267.21	0.0274212	0.0121693	10.9705	0.688925	Competition	Control	G3XAM7	17955	14570.7	21195.5	23094	56145.4	31256.1	241398	10229.3	390318	375268	396324	387999	235681	6063.22	168603	34055.2	135462	68957	14541	18548.3	16169.9	30447.9	52715.6	54200.7	298570	20936.5	639319	1.18254e+06	619353	1.00756e+06	210188	11648.1	168603	57524	141646	130728
K7EKP8|K7EKP8_HUMAN	2	1	84.64	0.0277992	0.0123143	28.7929	0.686706	Competition	Control	K7EKP8	6728.41	3565.26	2758.84	34.0045	19212.3	59.2831	91816.2	149231	134299	155325	195988	205023	61391.4	2962.49	52450.9	0	13904.1	7948.06	5449.06	4538.53	2104.7	44.8328	18038.7	102.802	113562	305434	219975	489457	306279	532409	54750.9	5691.27	52450.9	0	14538.8	15067.9
Q5JRX3|PREP_HUMAN;A0A0A0MRX9|A0A0A0MRX9_HUMAN;B1APQ0|B1APQ0_HUMAN;H0Y4F7|H0Y4F7_HUMAN;H0Y7L7|H0Y7L7_HUMAN	9	8	334.13	0.0279821	0.0123726	2.63256	0.68564	Competition	Probe	Q5JRX3	79494.6	70746.9	55272.2	198716	50334.4	901241	333354	269078	391116	921948	765453	417655	54550.3	137130	89208.7	415265	111667	369212	64379.4	90059.8	42166.8	261995	47259.6	1.56283e+06	412305	550727	640626	2.90523e+06	1.19621e+06	1.08457e+06	48649.7	263442	89208.7	701440	116765	699950
P00403|COX2_HUMAN	2	2	100.76	0.0288984	0.0127543	39.5961	0.680376	Competition	Probe	P00403	10387.8	593246	21061.8	9964.25	46903	20539.5	76094.9	4284.34	869170	1.51455e+06	316355	1.68691e+06	6242.54	23729.8	34509.2	19401.6	5777.5	23162.9	8412.62	755193	16067.9	13137.2	44037.8	35617.2	94117.1	8768.82	1.42365e+06	4.77263e+06	494382	4.38059e+06	5567.3	45587.5	34509.2	32771.9	6041.25	43912.1
H0YNA5|H0YNA5_HUMAN	1	1	39.61	0.0293462	0.0129282	20.3694	0.67785	Competition	Control	H0YNA5	0	1592.02	0	0	0	1447.91	2279.97	0	17835.2	3474.79	23331.7	14999.8	1298.79	3783.34	740.064	1245.97	98.8334	883.025	0	2026.62	0	0	0	2510.79	2819.95	0	29213.1	10949.7	36461.4	38951.7	1158.3	7268.21	740.064	2104.62	103.345	1674.03
O00303|EIF3F_HUMAN;H0YDT6|H0YDT6_HUMAN	2	2	81.25	0.0296473	0.013037	69.9542	0.676167	Competition	Control	O00303	948.071	659.39	126.493	104.55	336.646	21.9345	8589.95	51.1163	13787.1	37126.2	42900.1	51240.8	2281.59	8.45734	5662.73	277.211	5816.29	973.68	767.804	839.394	96.5002	137.842	316.082	38.0363	10624.4	104.62	22582.5	116992	67041.8	133063	2034.79	16.2475	5662.73	468.249	6081.8	1845.9
Q9NZL9|MAT2B_HUMAN;E5RJR3|E5RJR3_HUMAN	2	2	56.91	0.029742	0.0130547	14.8742	0.675641	Competition	Probe	Q9NZL9	1271.91	0	31568.8	5445.22	3913.38	1101.57	40255.9	8376.38	42775.5	154.191	57979	0	10053.7	0	0	0	0	0	1030.07	0	24083.6	7179.18	3674.33	1910.22	49790	17144.1	70063.9	485.883	90606.2	0	8966.24	0	0	0	0	0
A0A1B0GVU9|A0A1B0GVU9_HUMAN;A0A0U1RQE9|A0A0U1RQE9_HUMAN;A0A0U1RQX5|A0A0U1RQX5_HUMAN	2	2	111.79	0.0301367	0.0132039	2.69426	0.673459	Competition	Probe	A0A1B0GVU9	4169.99	29870	28607.6	17428.6	8659.12	11822.2	26849.3	6854.2	53266.8	57010.6	45535.2	35061.2	20155.7	0	23919.4	0	39278.7	0	3377.1	38024.1	21824.5	22978.5	8130.16	20500.7	33208.2	14028.6	87248.1	179651	71159.9	91047.5	17975.5	0	23919.4	0	41071.8	0
O95674|CDS2_HUMAN	1	1	85.82	0.0303202	0.0132341	20.4742	0.672453	Competition	Control	O95674	14750.6	16545.9	8869.43	4344.47	10337.6	7044.76	99271.4	87832.6	228256	155945	358120	337779	89885.5	1158.45	50814.6	3264.89	15698.4	0	11945.9	21062.7	6766.42	5727.91	9706.14	12216.2	122783	179768	373870	491410	559650	877152	80162.8	2225.5	50814.6	5514.85	16415	0
Q9UMX5|NENF_HUMAN	3	3	197.65	0.0303231	0.0132341	15.9121	0.672437	Competition	Control	Q9UMX5	27390.8	13113.2	25159.9	5259.84	26915.8	36907.1	455649	466326	569559	8681.99	624049	19835.7	72415.8	93463.9	82009.5	116713	50506.2	28913.6	22182.7	16692.9	19194.3	6934.77	25271.6	64000	563564	954438	932906	27358.5	975228	51509.8	64582.8	179554	82009.5	197144	52811.8	54814.2
J3QQ67|J3QQ67_HUMAN;H0YHA7|H0YHA7_HUMAN;F8VUA6|F8VUA6_HUMAN;G3V203|G3V203_HUMAN;F8VYV2|F8VYV2_HUMAN;A0A075B7A0|A0A075B7A0_HUMAN	8	7	537.65	0.0303706	0.0132341	1.41103	0.672177	Probe	Competition	J3QQ67	1.17446e+07	1.48042e+07	1.18318e+07	1.60681e+07	1.23277e+07	1.85731e+07	9.92039e+06	1.35482e+07	1.04748e+07	1.42488e+07	1.23977e+07	1.02973e+07	1.10196e+07	1.65451e+07	1.5234e+07	1.86577e+07	1.66076e+07	2.19599e+07	9.51147e+06	1.88456e+07	9.02641e+06	2.11848e+07	1.15746e+07	3.22073e+07	1.22699e+07	2.77294e+07	1.71571e+07	4.49005e+07	1.93744e+07	2.67401e+07	9.82761e+06	3.17849e+07	1.5234e+07	3.15155e+07	1.73658e+07	4.16314e+07
J3KRI4|J3KRI4_HUMAN;J3KRZ2|J3KRZ2_HUMAN	1	1	38.33	0.0304309	0.0132364	Infinity	0.671847	Competition	Control	J3KRI4	0	0	0	0	0	0	3717.15	0	0	183.514	0	35717	0	0	0	0	0	0	0	0	0	0	0	0	4597.51	0	0	578.285	0	92750.4	0	0	0	0	0	0
Q07065|CKAP4_HUMAN	24	24	1880.47	0.0305491	0.0132638	18.5107	0.671203	Competition	Control	Q07065	392592	535059	262957	290644	423671	91581	7.69007e+06	74038.5	6.86971e+06	1.50546e+06	1.19799e+07	8.83747e+06	2.66961e+06	992568	1.51019e+06	241772	311782	98506.8	317944	681123	200608	383195	397791	158809	9.51138e+06	151536	1.12522e+07	4.74399e+06	1.87215e+07	2.29493e+07	2.38084e+06	1.90683e+06	1.51019e+06	408387	326015	186749
P29401|TKT_HUMAN;A0A0B4J1R6|A0A0B4J1R6_HUMAN;E9PFF2|E9PFF2_HUMAN;F8W888|F8W888_HUMAN;F8WAX4|F8WAX4_HUMAN	10	10	376.46	0.0307123	0.0133106	3.98966	0.670317	Competition	Control	P29401	81076.6	76607.6	90377.4	93782.5	70399.1	113319	337608	143016	454625	82246.9	580321	498999	204229	15379.7	139618	267010	105262	100974	65660.6	97520.4	68948.2	123646	66098.7	196505	417567	292713	744650	259175	906892	1.29581e+06	182138	29546	139618	451018	110068	191426
P42224|STAT1_HUMAN;J3KPM9|J3KPM9_HUMAN;D2KFR9|D2KFR9_HUMAN;E7ENM1|E7ENM1_HUMAN;E9PH66|E9PH66_HUMAN;H7BZB5|H7BZB5_HUMAN;H7BZ88|H7BZ88_HUMAN	23	22	1538.84	0.0308088	0.0133284	1.38551	0.669794	Competition	Control	P42224	2.44277e+06	1.35813e+06	1.58011e+06	1.98974e+06	1.95858e+06	1.408e+06	2.39028e+06	2.32068e+06	2.70927e+06	2.00348e+06	3.42729e+06	2.02566e+06	2.66258e+06	1.88476e+06	2.59095e+06	1.78694e+06	2.36402e+06	2.80261e+06	1.9783e+06	1.72888e+06	1.20546e+06	2.62335e+06	1.83894e+06	2.44159e+06	2.95639e+06	4.74978e+06	4.43764e+06	6.31334e+06	5.35597e+06	5.26026e+06	2.37457e+06	3.62084e+06	2.59095e+06	3.01839e+06	2.47194e+06	5.31316e+06
Q15365|PCBP1_HUMAN;F8VTZ0|F8VTZ0_HUMAN	7	5	349.47	0.0309107	0.0133485	5.28828	0.669244	Competition	Control	Q15365	91724.4	77226.5	127128	126016	107975	50193.2	527771	294733	751552	29870.1	708577	756091	352712	435095	361158	160503	141482	176830	74283.8	98308.3	96984.8	166144	101379	87039.1	652767	603236	1.231e+06	94126.2	1.10732e+06	1.96343e+06	314560	835864	361158	271113	147941	335233
B1AH77|B1AH77_HUMAN	2	1	57.16	0.0311008	0.0133872	2.21635	0.668221	Competition	Control	B1AH77	344558	337013	378964	238487	211234	76796.1	363603	880725	430023	664358	546464	632291	459043	737445	353137	148231	198897	356685	279043	429013	289109	314430	198330	133171	449718	1.8026e+06	704354	2.09351e+06	853983	1.64195e+06	409389	1.41671e+06	353137	250383	207976	676200
Q969Q0|RL36L_HUMAN;H0Y5B4|H0Y5B4_HUMAN;H0Y3V9|H0Y3V9_HUMAN	5	5	166.43	0.0311116	0.0133872	1.91151	0.668163	Probe	Competition	Q969Q0	5.64841e+08	5.18676e+08	6.44079e+08	8.70874e+08	7.16558e+08	6.80299e+08	5.59823e+08	7.61057e+08	4.78368e+08	4.50178e+08	4.0811e+08	3.44228e+08	1.26057e+09	1.63044e+09	5.1358e+08	5.08706e+08	7.18476e+08	1.10613e+09	4.57442e+08	6.60267e+08	4.91363e+08	1.14819e+09	6.72786e+08	1.17969e+09	6.92411e+08	1.55767e+09	7.8354e+08	1.41859e+09	6.37771e+08	8.93898e+08	1.12421e+09	3.13225e+09	5.1358e+08	8.59276e+08	7.51275e+08	2.097e+09
A0A0A0MS74|A0A0A0MS74_HUMAN	1	1	37.67	0.031308	0.0134388	4.21439	0.667111	Competition	Control	A0A0A0MS74	17135	6671.15	12837.4	5144.44	33428.8	65616.7	46909	19132	219895	208228	71436	27927.4	74114.5	99020.8	22226.6	186897	48761.2	31255.4	13877	8492.28	9793.57	6782.61	31386.7	113785	58018.8	39157.8	360176	656163	111636	72522.5	66097.7	190230	22226.6	315696	50987.2	59253.8
G0XQ39|G0XQ39_HUMAN;E9PNJ4|E9PNJ4_HUMAN	2	2	149.64	0.0314727	0.0134388	15.8243	0.666233	Competition	Control	G0XQ39	11210.9	0	5336.79	0	0	13203.7	14539.3	28106.7	101406	92049.6	110228	124465	0	96991	3495.54	0	5373.8	40.846	9079.27	0	4071.4	0	0	22896.3	17982.8	57526.5	166097	290065	172258	323212	0	186330	3495.54	0	5619.12	77.4355
P49411|EFTU_HUMAN;H3BNU3|H3BNU3_HUMAN	19	19	1101.14	0.0314826	0.0134388	3.92191	0.66618	Competition	Control	P49411	610921	314897	510455	485275	412754	186808	1.57837e+06	1.36634e+06	598437	315758	2.79299e+06	3.23569e+06	838440	122248	681737	275614	674252	781369	494760	400859	389422	639804	387540	323941	1.95219e+06	2.7965e+06	980207	995011	4.36472e+06	8.40249e+06	747748	234851	681737	465550	705032	1.48131e+06
X5D2R7|X5D2R7_HUMAN;A0A140T998|A0A140T998_HUMAN	6	6	355.12	0.0315053	0.0134388	3.96646	0.66606	Competition	Control	X5D2R7	108626	101407	178421	117589	92391	153104	225453	145747	296321	903240	249933	1.16025e+06	197959	199145	177966	731264	102488	99047.9	87971.7	129090	136116	155034	86747.1	265495	278849	298303	485358	2.84627e+06	390581	3.01296e+06	176546	382579	177966	1.23521e+06	107166	187774
G3V1U3|G3V1U3_HUMAN;F8VQZ7|F8VQZ7_HUMAN;F8VSC4|F8VSC4_HUMAN;F8VY03|F8VY03_HUMAN	3	3	99.61	0.031511	0.0134388	10.6289	0.66603	Competition	Control	G3V1U3	3786.08	0	2485.37	0	0	2465.1	13584.5	84.1305	17767.6	7813.99	30664.4	22945.2	3331.58	1532.25	3829.19	82.3997	6265.2	2179.54	3066.19	0	1896.07	0	0	4274.68	16801.9	172.191	29102.4	24623.3	47920.7	59584.6	2971.21	2943.63	3829.19	139.185	6551.2	4131.97
A0A2R8YD50|A0A2R8YD50_HUMAN;A0A2R8Y7L2|A0A2R8Y7L2_HUMAN;E7ER27|E7ER27_HUMAN;E7EPL9|E7EPL9_HUMAN;A0A2R8YDT8|A0A2R8YDT8_HUMAN;A0A2R8Y7W2|A0A2R8Y7W2_HUMAN	7	7	381.48	0.0320838	0.0136589	2.48196	0.663006	Competition	Control	A0A2R8YD50	278590	1.15451e+06	165766	326569	328410	814568	899386	1.33178e+06	1.38932e+06	400109	1.70639e+06	1.88871e+06	527116	684803	427706	1.39498e+06	359685	790185	225619	1.46968e+06	126462	430560	308348	1.41253e+06	1.1124e+06	2.72578e+06	2.27563e+06	1.26082e+06	2.66665e+06	4.90464e+06	470099	1.31558e+06	427706	2.35632e+06	376105	1.49803e+06
E9PP50|E9PP50_HUMAN;E9PK25|E9PK25_HUMAN;E9PQB7|E9PQB7_HUMAN;E9PLJ3|E9PLJ3_HUMAN;E9PS23|E9PS23_HUMAN;Q9Y281|COF2_HUMAN	8	8	569.36	0.0321579	0.0136663	3.15804	0.662618	Competition	Control	E9PP50	1.99074e+06	336593	1.78904e+06	1.02112e+06	2.17765e+06	264547	6.33253e+06	2.86197e+06	3.02266e+06	780498	7.82065e+06	3.11862e+06	3.52857e+06	2.47711e+06	3.62634e+06	1.3251e+06	2.56219e+06	1.81055e+06	1.61222e+06	428478	1.36484e+06	1.34628e+06	2.04462e+06	458747	7.83232e+06	5.85765e+06	4.95095e+06	2.45949e+06	1.22217e+07	8.09849e+06	3.14689e+06	4.7588e+06	3.62634e+06	2.23828e+06	2.67916e+06	3.43242e+06
H0Y362|H0Y362_HUMAN	2	2	117.05	0.0326473	0.0138498	19.2964	0.660071	Competition	Control	H0Y362	32685.9	4272.45	46981.1	0	14140.8	22436.8	150713	33951.9	498861	646084	749222	246712	28820.5	123167	90990.3	116266	75815.1	23756.3	26470.9	5438.77	35841.5	0	13277	38907.3	186407	69489.9	817108	2.03593e+06	1.17084e+06	640666	25703	236618	90990.3	196390	79276.1	45037
O00116|ADAS_HUMAN;A0A1B0GWA2|A0A1B0GWA2_HUMAN;B8ZZ81|B8ZZ81_HUMAN	7	7	208.14	0.03276	0.0138731	7.23156	0.659489	Competition	Control	O00116	36397.6	19620.6	46419.8	34729.3	24153.5	8605.78	158015	20515.8	22303.9	216085	303606	508309	90267.9	33801.6	57238.9	19390.5	32932.9	56332.4	29476.9	24976.7	35413.3	45788.4	22678	14923.1	195439	41989.9	36532.6	680922	474458	1.31999e+06	80503.8	64936.5	57238.9	32753.2	34436.3	106795
Q8NI22|MCFD2_HUMAN	1	1	39.69	0.0331432	0.0140107	Infinity	0.65752	Competition	Control	Q8NI22	0	0	0	0	0	0	146.999	0	70947.5	0	0	13648.8	0	0	0	0	0	0	0	0	0	0	0	0	181.813	0	116208	0	0	35443.4	0	0	0	0	0	0
P20339|RAB5A_HUMAN	3	1	173.36	0.0334992	0.0141364	4.43067	0.655707	Competition	Control	P20339	15290	21178.8	14139.5	27887.3	23829.1	6517.53	11732.1	21175.5	145196	51021.4	130859	122260	11863	8783.8	28714.9	18938.4	35043.3	37891	12382.7	26960.3	10786.9	36767.7	22373.5	11301.9	14510.7	43340.2	237823	160778	204500	317488	10579.8	16874.6	28714.9	31989.6	36643	71833.6
P13645|K1C10_HUMAN;Q7Z3Y7|K1C28_HUMAN;A0A3B3ITG2|A0A3B3ITG2_HUMAN;Q7Z3Z0|K1C25_HUMAN;Q7Z3Y9|K1C26_HUMAN	58	50	5068.98	0.0335939	0.0141515	1.59113	0.655228	Probe	Competition	P13645	1.91856e+08	1.82177e+08	1.37883e+08	1.69569e+08	1.63213e+08	2.23771e+08	1.62657e+08	2.31005e+08	8.19692e+07	1.16227e+08	8.30598e+07	5.65496e+07	1.96328e+08	2.17463e+08	1.22382e+08	1.49719e+08	2.0641e+08	2.71556e+08	1.55377e+08	2.31908e+08	1.0519e+08	2.23565e+08	1.53242e+08	3.88037e+08	2.0118e+08	4.72801e+08	1.34261e+08	3.66253e+08	1.29801e+08	1.46849e+08	1.75091e+08	4.1777e+08	1.22382e+08	2.52896e+08	2.15833e+08	5.14814e+08
P50453|SPB9_HUMAN;A0A0C4DGW9|A0A0C4DGW9_HUMAN;P30740|ILEU_HUMAN	5	5	178.76	0.0339939	0.014295	2.63907	0.653213	Competition	Control	P50453	31806.3	243264	23088.5	16304.3	56487.4	55289.9	145091	95572.3	278902	69173	364450	171689	44147.5	86971.5	66566.3	22785.6	134439	114832	25758.6	309671	17614	21496.1	53036.8	95877.3	179454	195609	456825	217977	569542	445845	39372.1	167082	66566.3	38488	140576	217698
B0QY89|B0QY89_HUMAN;B0QY90|B0QY90_HUMAN;C9JHP4|C9JHP4_HUMAN;H7C3A0|H7C3A0_HUMAN	6	5	349.42	0.0341167	0.0143216	3.58087	0.652598	Competition	Control	B0QY89	97450.2	24700	59444.7	11878.8	34151.2	77431.3	85352.9	40120.8	135269	121280	428231	282114	74448.8	42662.3	80113.8	123247	23625.1	33288.5	78920.9	31442.7	45349.9	15661.5	32065	134272	105568	82115.9	221563	382176	669215	732598	66395.9	81958.9	80113.8	208182	24703.6	63108.1
A0A0G2JIW1|A0A0G2JIW1_HUMAN;V9GZ37|V9GZ37_HUMAN;P48741|HSP77_HUMAN	12	4	596.7	0.0342562	0.0143551	5.98282	0.651902	Competition	Control	A0A0G2JIW1	232728	227037	251129	173825	344816	74966.4	1.27573e+06	286141	1.3987e+06	167992	2.21966e+06	2.45639e+06	905327	795945	682265	96105.7	227449	173533	188477	289015	191585	229178	323752	129998	1.57788e+06	585649	2.291e+06	529374	3.46875e+06	6.37879e+06	807400	1.5291e+06	682265	162336	237832	328982
A0A0D9SF54|A0A0D9SF54_HUMAN;A0A0D9SFF6|A0A0D9SFF6_HUMAN;A0A1B0GTB7|A0A1B0GTB7_HUMAN	8	8	276.07	0.0343294	0.0143607	2.66377	0.651537	Competition	Probe	A0A0D9SF54	106551	60850.2	137063	26197.6	135713	59167.1	119378	173763	82610	155365	282858	318552	77951.7	12847	72286.6	111326	105320	45427.3	86291.3	77461.4	104564	34539.8	127423	102601	147652	355644	135311	489583	442035	827222	69519.8	24680.5	72286.6	188045	110128	86120.7
E9PEX6|E9PEX6_HUMAN	2	2	95.25	0.0356136	0.0148721	10.7949	0.645238	Competition	Control	E9PEX6	272.486	115.084	2936.49	8548.01	3998.67	23.0817	1227.66	3553.87	104521	5053.17	29032.9	28184.5	3902.1	2959.2	10329.4	1520.05	10898.1	1709.09	220.675	146.5	2240.23	11270	3754.4	40.0255	1518.41	7273.77	171199	15923.5	45371	73189.9	3480.02	5684.95	10329.4	2567.58	11395.6	3240.09
O15355|PPM1G_HUMAN	1	1	45.98	0.0356848	0.014876	Infinity	0.644894	Competition	Control	O15355	0	0	0	0	0	0	10406	17161.2	0	0	175721	30068	0	9025.25	0	0	0	7020.1	0	0	0	0	0	0	12870.5	35124	0	0	274607	78081.2	0	17338.5	0	0	0	13308.7
P28072|PSB6_HUMAN	1	1	69.37	0.0358819	0.0149323	9.25369	0.643945	Competition	Control	P28072	68986.7	50977.7	69676.4	32718.2	60455.5	56382.6	421921	23881.9	594435	615763	770536	712288	163598	707293	174391	87821.4	132181	9972.17	55869.5	64893.9	53155.6	43136.8	56762.5	97772.1	521848	48879.4	973652	1.94038e+06	1.20415e+06	1.84968e+06	145902	1.35879e+06	174391	148343	138215	18905.2
P48735|IDHP_HUMAN;H0YL11|H0YL11_HUMAN	5	5	149.75	0.0362185	0.0150463	18.3831	0.642333	Competition	Control	P48735	6154.71	2711.34	10401.1	5159.34	4365.15	0	29949.7	60306.8	132116	109920	167404	29582.8	109220	5931.84	12453	576.813	1017.66	16056.8	4984.44	3451.5	7934.89	6802.26	4098.5	0	37042.9	123431	216399	346377	261609	76821.1	97406.3	11395.7	12453	974.317	1064.12	30440.3
P30040|ERP29_HUMAN;F8VY02|F8VY02_HUMAN;F8W1G0|F8W1G0_HUMAN	2	2	46.42	0.0374023	0.0155113	5.45549	0.636755	Competition	Control	P30040	38102.5	36393.4	114075	2686.32	65053.5	2653.45	95907.4	41160.3	173946	403380	482038	216345	200791	30929.2	52566.5	3463.61	73416.3	37696.2	30857.7	46328.3	87027.1	3541.75	61079.6	4601.3	118622	84243.4	284914	1.27112e+06	753302	561808	179072	59418.3	52566.5	5850.53	76767.8	71464.1
O94776|MTA2_HUMAN	2	2	100.43	0.0376101	0.0155707	7.32596	0.635791	Competition	Probe	O94776	7742.5	700.408	558.224	837.23	14136.8	1128.1	12298.1	5001.71	36943.6	67039.9	11514.9	1694.44	112.747	1234.38	11766.4	90.6476	2261.76	2892.42	6270.34	891.61	425.865	1103.83	13273.2	1956.22	15210.8	10237.1	60511.6	211255	17994.8	4400.14	100.552	2371.38	11766.4	153.116	2365.01	5483.44
K7EM49|K7EM49_HUMAN;K7EMN2|K7EMN2_HUMAN	2	2	63.94	0.0379402	0.0156803	9.26373	0.634267	Competition	Control	K7EM49	39272.6	7663.53	26879.3	35165.4	17424.8	70820.5	54850.7	10942.1	526570	127251	693414	414022	49653.1	85838.3	55367.7	68799.9	85483.4	188433	31805.3	9755.56	20506	46363.4	16360.4	122809	67841.5	22395.4	862492	400993	1.08363e+06	1.07514e+06	44282.2	164905	55367.7	116213	89385.7	357231
A8MYV2|A8MYV2_HUMAN;B8ZZ09|B8ZZ09_HUMAN	3	1	150.2	0.0381417	0.0157366	1.94139	0.633342	Control	Competition	A8MYV2	495217	369809	699220	860639	674375	183068	286073	319905	275452	168002	354004	287277	471299	288813	526935	433711	613127	607743	401056	470762	533429	1.1347e+06	633179	317455	353826	654754	451175	529404	553217	746007	420320	554842	526935	732599	641117	1.15215e+06
O15144|ARPC2_HUMAN	2	2	52.98	0.038289	0.0157703	15.6114	0.632668	Competition	Control	O15144	798.44	1489.88	0	15.275	3446.87	0	5004.62	10752.7	3562.5	16641.5	4953.12	48858.4	12436.7	2723.48	1546.72	0	2594.57	79.3879	646.623	1896.59	0	20.1391	3236.31	0	6189.9	22007.8	5835.19	52440.5	7740.46	126876	11091.4	5232.09	1546.72	0	2713.01	150.503
J3KNQ4|J3KNQ4_HUMAN	1	1	49.69	0.0387991	0.0159531	9.93056	0.630351	Competition	Control	J3KNQ4	1325.12	2317.66	0	0	11039.9	2832.34	10100.6	2599.56	32792.5	71859.6	42412.5	14169.1	8798.9	10757.5	22423.6	132.024	15692.9	3733.85	1073.16	2950.34	0	0	10365.5	4911.5	12492.9	5320.56	53712.4	226443	66279.8	36794.5	7847.14	20666.3	22423.6	223.007	16409.3	7078.61
P23490|LORI_HUMAN	1	1	34.23	0.0388745	0.0159568	4.48969	0.63001	Probe	Competition	P23490	192222	124687	109170	141481	150909	5520.18	11644.9	66908.6	29079.9	22941.1	50163.3	18847.8	190842	207609	93908.9	37463.9	127916	238337	155673	158725	83285	186534	141690	9572.44	14402.9	136943	47631.3	72291.6	78392.4	48944.4	170199	398840	93908.9	63281.8	133756	451838
Q7KZF4|SND1_HUMAN;H7C597|H7C597_HUMAN	5	4	190.19	0.0396829	0.0162609	9.35312	0.626393	Competition	Control	Q7KZF4	24863.9	3645.88	32789	1465.11	26666.3	5176.73	186627	46337.6	241521	64923.9	316286	29175.1	69587.8	1312.36	62740.7	997.715	36406.3	112109	20136.3	4641.16	25014.5	1931.65	25037.4	8976.88	230827	94839.8	395597	204587	494274	75762.3	62060.7	2521.19	62740.7	1685.28	38068.2	212535
Q8WY22|BRI3B_HUMAN	1	1	48.87	0.0400481	0.0163826	33.3558	0.624779	Competition	Probe	Q8WY22	4956.43	0	15495.9	9361.14	0	12387.3	102344	40083.6	238175	22258.4	420897	273447	0	10341	3297.57	15164.7	0	4090.73	4014.01	0	11821.7	12342.1	0	21480.6	126583	82039.7	390117	70140.1	657755	710093	0	19866.3	3297.57	25615.2	0	7755.18
A0A0C4DFM1|A0A0C4DFM1_HUMAN	3	3	111.89	0.0402236	0.0164265	7.11939	0.624007	Competition	Control	A0A0C4DFM1	9036.98	6219.56	11271.1	5080.79	5421.37	16493	81232.9	12968.4	14805.4	46416.4	120877	104750	63579.6	3428.58	75167.6	2322.2	24179.2	30308.6	7318.68	7917.41	8598.64	6698.7	5090.2	28600.3	100472	26542.7	24250.5	146266	188899	272018	56702.3	6586.68	75167.6	3922.52	25283	57458.8
Q9H0U4|RAB1B_HUMAN;P62820|RAB1A_HUMAN;E9PLD0|E9PLD0_HUMAN;Q92928|RAB1C_HUMAN;E7END7|E7END7_HUMAN	5	4	259.4	0.0406587	0.016576	2.22287	0.622105	Competition	Control	Q9H0U4	812318	586453	649540	655740	736152	291759	1.30661e+06	823203	521294	2.3305e+06	1.77501e+06	1.53903e+06	1.07604e+06	399437	996943	604475	1.04832e+06	1.13304e+06	657863	746546	495529	864551	691183	505935	1.61607e+06	1.68486e+06	853851	7.34383e+06	2.77388e+06	3.99659e+06	959646	767363	996943	1.02104e+06	1.09618e+06	2.148e+06
E9PBS1|E9PBS1_HUMAN;D6RF62|D6RF62_HUMAN	7	6	329.93	0.0408216	0.0165947	4.9281	0.621398	Competition	Control	E9PBS1	33550.5	40587	45294	69896	40655.3	20066.8	197536	12529.8	163610	248878	330242	279473	107045	21707.6	88004	52868.3	49136.8	91872	27171.1	51666.6	34554.5	92153.5	38171.8	34797.5	244320	25645	267985	784259	516084	725740	95466.3	41702.7	88004	89301.9	51379.9	174170
G8JLD5|G8JLD5_HUMAN;O00429|DNM1L_HUMAN;F8VZ52|F8VZ52_HUMAN	5	5	217.59	0.0408425	0.0165947	3.12444	0.621307	Competition	Control	G8JLD5	7322.42	16792.2	33194	7207.93	32306.8	10463.9	34615.4	34089.5	46220	131021	61221	28046.1	36997.5	1083.77	18311.7	43175.3	9371.04	8401.4	5930.13	21376.2	25323.5	9503.2	30333.3	18145.2	42813.7	69771.6	75705.8	412871	95672.6	72830.7	32995.6	2082.05	18311.7	72929.2	9798.83	15927.3
F8VZY9|F8VZY9_HUMAN	9	7	432.99	0.0413971	0.0167917	3.29457	0.618915	Competition	Control	F8VZY9	117513	144907	137012	320439	84094.8	211017	783991	117530	341979	157556	1.0819e+06	860978	329125	224193	187678	147878	112492	147624	95169	184464	104525	422479	78957.7	365921	969671	240550	560142	496488	1.69073e+06	2.2358e+06	293524	430698	187678	249787	117627	279865
Q96AY3|FKB10_HUMAN;H0Y827|H0Y827_HUMAN	2	2	44.59	0.0419279	0.0169784	2.34395	0.61665	Competition	Probe	Q96AY3	69068.2	139046	64326.9	31063.9	95973	224121	121432	192961	101237	234413	220837	407447	33188.2	44000.9	69230.3	179722	150160	69072.8	55935.5	177004	49074.5	40955.8	90110.3	388644	150191	394936	165821	738679	345112	1.05807e+06	29598.3	84530.6	69230.3	303576	157014	130948
C9JNW5|C9JNW5_HUMAN	5	4	282.17	0.0420343	0.0169908	1.99082	0.616199	Probe	Competition	C9JNW5	855045	747729	666297	883898	819227	337749	554732	468071	578734	88982.7	876624	492571	982454	996015	1.02623e+06	623843	1.13211e+06	1.3307e+06	692466	951848	508313	1.16536e+06	769183	585685	686114	958010	947935	280401	1.36994e+06	1.27912e+06	876184	1.91345e+06	1.02623e+06	1.05376e+06	1.18379e+06	2.52273e+06
Q567V2|M17L2_HUMAN	1	1	49.16	0.042161	0.0169908	3.57338	0.615663	Probe	Control	Q567V2	96973.7	167583	58631.5	91673	69872.3	17554.3	92615.3	10135.6	185122	550272	93611.2	158510	334719	308355	280270	461432	172112	237978	78535	213330	44729.5	120865	65604.1	30440.7	114550	20744.7	303220	1.73401e+06	146290	411622	298513	592383	280270	779422	179969	451158
Q9NX62|IMPA3_HUMAN	2	2	36.3	0.0422051	0.0169908	2.22802	0.615477	Competition	Probe	Q9NX62	7459.59	21729	5132.37	4810.99	4426.72	15139	5260.24	5427.05	67860.1	0	2925.97	3964.18	0	0	0	0	14218.5	24128.3	6041.22	27660.7	3915.44	6342.99	4156.3	26252.4	6506.07	11107.6	111151	0	4572.54	10294.3	0	0	0	0	14867.6	45742.3
Q04695|K1C17_HUMAN;F5GWP8|F5GWP8_HUMAN;K7EPJ9|K7EPJ9_HUMAN	13	2	915.91	0.0422412	0.0169908	2.32376	0.615325	Control	Probe	Q04695	526512	560086	510209	828312	420713	315276	493037	247826	263779	90456.1	217626	103851	352272	221453	216904	23528.2	270060	276123	426400	712981	389234	1.09208e+06	395013	546715	609807	507230	432055	285044	340093	269682	314168	425436	216904	39742.4	282388	523472
Q8N766|EMC1_HUMAN;A0A286YEW0|A0A286YEW0_HUMAN	2	2	44.26	0.0425907	0.0171028	3.94282	0.613855	Competition	Control	Q8N766	5449.31	6248.95	3859.02	18988.3	2802.65	14708.5	12578.1	24597.4	9585.59	45674.9	91012	21802	14456.2	5526.81	6207.03	8833.62	522.373	20214.3	4413.17	7954.82	2944.01	25034.8	2631.44	25505.7	15557.1	50343.8	15700.7	143930	142228	56615.9	12892.5	10617.6	6207.03	14921.2	546.219	38322.2
P06756|ITAV_HUMAN	1	1	77.03	0.0429748	0.0172283	13.643	0.612251	Competition	Control	P06756	2392.72	0	0	0	2144.3	0	0	25151.5	0	2405.17	2247.83	32094.2	6284.9	9609.95	3415.36	935.84	6867.04	5925.22	1937.77	0	0	0	2013.31	0	0	51477.9	0	7579.13	3512.78	83342.7	5605.08	18461.8	3415.36	1580.76	7180.53	11233
P01834|IGKC_HUMAN	1	1	126.93	0.0431142	0.0172554	5.50356	0.611672	Control	Competition	P01834	525843	444666	72933.1	69329.1	1.14311e+06	809146	118391	77070.1	105244	87543.7	123326	45342.3	301199	247997	64821.8	53576.3	109969	106522	425859	566053	55640.1	91406	1.07328e+06	1.40313e+06	146431	157741	172383	275866	192727	117746	268619	476429	64821.8	90497.8	114989	201943
P56192|SYMC_HUMAN;F5H2V6|F5H2V6_HUMAN;H0YHV5|H0YHV5_HUMAN;H0YIP0|H0YIP0_HUMAN	4	4	159.97	0.0433014	0.0173015	4.06929	0.610896	Competition	Probe	P56192	6169.59	5821.56	7490.26	4598.63	6166.43	37171.2	21057.2	5892.05	100335	12226	29564.9	23153.9	18843.9	6782.99	5442.4	3028.03	8840.43	4301.07	4996.5	7410.76	5714.26	6063.01	5789.74	64458	26044.3	12059.4	164343	38526.4	46202.3	60126.5	16805.6	13030.9	5442.4	5114.77	9244	8153.93
B4DR61|B4DR61_HUMAN;F8W776|F8W776_HUMAN;A6NIF9|A6NIF9_HUMAN	5	5	275.9	0.0433834	0.0173056	3.42245	0.610557	Competition	Control	B4DR61	131778	411955	129838	208512	81920.5	420279	214227	194864	508638	1.14881e+06	1.18654e+06	1.48455e+06	150137	332121	177019	608476	344498	262817	106721	524413	99052.3	274910	76916.2	728798	264964	398832	833121	3.62012e+06	1.85425e+06	3.85511e+06	133897	638041	177019	1.0278e+06	360224	498246
E9PMD7|E9PMD7_HUMAN;P62136|PP1A_HUMAN;F8VR82|F8VR82_HUMAN;F8W0W8|F8W0W8_HUMAN;A0A087WYY5|A0A087WYY5_HUMAN;P62140|PP1B_HUMAN;C9J9S3|C9J9S3_HUMAN;E7ETD8|E7ETD8_HUMAN;F5H037|F5H037_HUMAN	4	4	130.89	0.0435732	0.0173525	2.08487	0.609775	Competition	Control	E9PMD7	194967	217644	169708	182215	207052	204642	390774	358601	161771	193644	491646	855842	211396	236979	255425	158237	244556	282293	157896	277057	129469	240239	194404	354866	483325	733956	264972	610208	768316	2.22247e+06	188529	455263	255425	267284	255720	535170
O95197|RTN3_HUMAN	1	1	106.49	0.044198	0.0175722	2.6692	0.60722	Competition	Probe	O95197	46166.8	38844.3	2712.26	402198	40506.9	42225.4	156991	143344	276692	177213	202159	279027	21305.9	189146	81895.8	18163.8	50642.7	101690	37388.6	49448.2	2069.16	530272	38032.5	73222.3	194172	293384	453207	558432	315922	724581	19001.3	363370	81895.8	30681.3	52954.5	192783
P31153|METK2_HUMAN	3	3	191.51	0.0443438	0.0176011	11.3172	0.606628	Competition	Control	P31153	8024.71	11324.1	8761.84	1695.11	8672.56	0	72853.7	14353.3	147873	6327.52	141170	52887.5	35122.9	68435.1	13453.9	22772.3	27434.8	58056	6498.88	14415.5	6684.34	2234.9	8142.78	0	90108.2	29377.2	242208	19939.2	220613	137339	31323.7	131471	13453.9	38465.5	28687.2	110062
G3V295|G3V295_HUMAN;G3V3I1|G3V3I1_HUMAN	5	5	233.34	0.0448488	0.0177722	6.21964	0.604589	Competition	Control	G3V295	30235.2	15983	38434.7	21964.6	33550.1	26772.3	154392	14308.4	320074	26418.9	313912	209201	85421.6	29068.1	67486	78551.4	45607.5	26631	24486.2	20346.1	29321.5	28958.9	31500.6	46425.4	190958	29285.3	524263	83250.9	490564	543257	76181.8	55843	67486	132684	47689.4	50486.8
P61204|ARF3_HUMAN;C9J1Z8|C9J1Z8_HUMAN;H0YGG7|H0YGG7_HUMAN	4	2	284.24	0.0449438	0.0177806	5.02414	0.604208	Competition	Control	P61204	498014	84436.9	534736	364781	451895	326634	2.04895e+06	218530	3.45879e+06	416879	3.22322e+06	1.99069e+06	1.00538e+06	664171	948354	175805	371584	427410	403321	107487	407946	480940	424290	566410	2.53422e+06	447269	5.6653e+06	1.31366e+06	5.03707e+06	5.16947e+06	896629	1.27594e+06	948354	296960	388547	810282
Q8NC51|PAIRB_HUMAN	1	1	44.49	0.0450731	0.0178024	3.2364	0.60369	Competition	Control	Q8NC51	6586.14	6097.91	10027.8	11872	8877.31	244.352	35245.6	22959.1	34831.6	17811.2	11983.9	18617	12205.1	4059.13	17728.2	3283.46	16097.4	10207.9	5333.84	7762.55	7650.13	15652.4	8335.02	423.727	43593.2	46990.8	57052.3	56126.3	18727.7	48345	10884.9	7798.04	17728.2	5546.22	16832.3	19352.1
A0A096LP07|A0A096LP07_HUMAN;J3QQX0|J3QQX0_HUMAN	1	1	51.71	0.0452779	0.017854	39.5408	0.602872	Competition	Control	A0A096LP07	51.6449	0	0	0	0	3321.13	2678.73	0	32918.7	24417.6	26602.9	46744	2913.55	0	1433.81	3751.96	24.6732	0	41.8251	0	0	0	0	5759.11	3313.16	0	53919.1	76944.4	41573.4	121386	2598.4	0	1433.81	6337.58	25.7996	0
J3KR24|J3KR24_HUMAN;A0A0A0MSX9|A0A0A0MSX9_HUMAN	2	2	61.4	0.0456883	0.0179864	5.04697	0.601242	Competition	Control	J3KR24	62144	25028.1	78434.7	85721.7	63058.2	33554.3	278364	371958	34564.1	321890	383164	366107	202195	23324.9	146963	9352.39	114428	229397	50327.8	31860.4	59837.2	113019	59206.2	58186	344292	761292	56614.1	1.01433e+06	598786	950714	180324	44809.6	146963	15797.5	119651	434889
O76094|SRP72_HUMAN;D6RDY6|D6RDY6_HUMAN	3	2	84.56	0.0470999	0.0185117	9.13804	0.595727	Probe	Control	O76094	2493.22	0	2728.83	89.6115	1804.55	495.4	2676.91	5783.1	405.665	5393.87	12491.8	23209.2	4896.54	9828.82	2630.9	47210.2	1770.59	3218.08	2019.16	0	2081.8	118.147	1694.32	859.064	3310.9	11836.4	664.458	16997.1	19521.5	60270.1	4366.89	18882.2	2630.9	79744.7	1851.42	6100.81
K7EID3|K7EID3_HUMAN;K7EPB2|K7EPB2_HUMAN	1	1	39.65	0.0480249	0.0188445	8.92947	0.592187	Probe	Control	K7EID3	30438.9	12933.7	6886.53	22526	11522.4	0	98831.3	48050.6	138332	58526.5	186949	55695.4	64673.1	26050.8	415252	77048.4	47047.6	122750	24651.2	16464.4	5253.68	29699.1	10818.6	0	122238	98346	226581	184428	292153	144631	57677.5	50046.4	415252	130146	49195.3	232709
Q96A33|CCD47_HUMAN	1	1	70.74	0.0485239	0.0190093	21.6495	0.590301	Competition	Control	Q96A33	0	1069.52	941.05	2133.47	0	2167.75	829.86	1386.41	41416.9	46020.3	2868.94	44125	1460.35	4538.14	0	0	1079.49	0	0	1361.49	717.92	2812.84	0	3759.06	1026.4	2837.59	67838.6	145018	4483.42	114585	1302.39	8718.27	0	0	1128.77	0
A0A075B7C0|A0A075B7C0_HUMAN;U3KQE2|U3KQE2_HUMAN	1	1	28.75	0.0487821	0.0190794	7.8793	0.589331	Competition	Control	A0A075B7C0	30133.8	13017.6	8013.48	2571.23	25404.8	81002.4	208388	9903.01	274292	197956	335834	235443	157096	9968.05	121411	1115.47	59621.8	11758.4	24404.1	16571.2	6113.42	3390.01	23852.9	140465	257742	20268.6	449276	623797	524823	611402	140103	19149.7	121411	1884.18	62343.6	22291.4
P00558|PGK1_HUMAN;P07205|PGK2_HUMAN	10	10	568.44	0.0489634	0.0191192	1.84596	0.588653	Competition	Control	P00558	2.68235e+06	850126	1.6668e+06	485698	1.73097e+06	663602	2.07192e+06	2.12365e+06	2.38105e+06	2.96347e+06	3.00644e+06	2.36795e+06	1.89345e+06	1.23299e+06	1.48474e+06	724408	3.59076e+06	1.63516e+06	2.17233e+06	1.0822e+06	1.27159e+06	640363	1.62523e+06	1.15074e+06	2.56263e+06	4.34652e+06	3.90003e+06	9.33844e+06	4.6983e+06	6.14914e+06	1.68864e+06	2.36871e+06	1.48474e+06	1.22363e+06	3.75468e+06	3.09993e+06
G3V1V0|G3V1V0_HUMAN;F8VZU9|F8VZU9_HUMAN;F8W1I5|F8W1I5_HUMAN	2	2	66.4	0.0491803	0.0191648	3.22224	0.587844	Competition	Probe	G3V1V0	51633.2	65898.4	50356.6	53206.3	108777	81585.7	108245	215733	198046	286182	156492	136697	5264.09	0	150696	2703.5	3804.23	179343	41815.6	83887.8	38416.6	70149.2	102132	141476	133881	441544	324389	901812	244556	354979	4694.69	0	150696	4566.59	3977.89	339997
H0YGW7|H0YGW7_HUMAN	1	1	43.82	0.0492395	0.0191648	8.89562	0.587624	Competition	Control	H0YGW7	467.059	17091.9	2634.17	9374.94	2340.75	4985.16	72628.1	61068.3	68850.8	3751.72	116157	5739.01	13849.1	63237.2	1834.43	32955.5	4942.56	45585.5	378.252	21757.7	2009.59	12360.3	2197.76	8644.68	89829.2	124989	112774	11822.4	181523	14903.2	12351	121486	1834.43	55666.4	5168.19	86420.6
H3BQB4|H3BQB4_HUMAN	1	1	56.12	0.0496498	0.0192665	21.1289	0.586104	Competition	Control	H3BQB4	0	0	5368.58	2846.19	0	6498.93	5448.15	4428.88	194122	81381.6	3720.65	21783.8	0	0	7475.23	9416.74	0	4238.07	0	0	4095.65	3752.52	0	11269.7	6738.48	9064.65	317961	256448	5814.42	56568.6	0	0	7475.23	15906.2	0	8034.49
A0A0C4DGQ8|A0A0C4DGQ8_HUMAN	1	1	37.61	0.049661	0.0192665	5.854	0.586062	Competition	Probe	A0A0C4DGQ8	5506.09	15978.5	4655.99	10379.6	10257.1	114839	34634.9	56397.7	5140.82	59254.4	143477	134800	19684.8	6063.16	17677.8	11588.4	11606.5	7466.35	4459.16	20340.4	3552.02	13684.9	9630.56	199140	42837.8	115430	8420.37	186722	224218	350050	17555.5	11648	17677.8	19574.4	12136.4	14154.7
H0YF90|H0YF90_HUMAN	1	1	55.24	0.0502693	0.0194711	6.75246	0.583829	Competition	Probe	H0YF90	14618.7	24661.1	13296	35794.3	12936.5	117744	16216.3	18076	9609.85	48688.9	46748.7	226124	19389.5	0	15418.2	0	5353.93	13961.5	11839.1	31393.2	10143.4	47192.5	12146.2	204178	20056.9	36996.4	15740.4	153428	73056.2	587204	17292.2	0	15418.2	0	5598.34	26468.2
P13674|P4HA1_HUMAN	3	3	98.62	0.0517391	0.0200082	3.87551	0.578524	Control	Probe	P13674	1.03702e+06	240226	848091	185807	159506	110480	114249	95694.4	194146	1.10896e+06	253337	216767	178542	28904.3	278143	105487	24192.9	50742	839842	305804	647002	244975	149762	191581	141308	195859	318001	3.49455e+06	395900	562904	159230	55528.3	278143	178182	25297.3	96196.4
Q9P2X0|DPM3_HUMAN	2	2	76.66	0.0526385	0.0203233	19.2036	0.57534	Competition	Control	Q9P2X0	1734.6	1597.42	5008.28	0	0	4387.93	19876.4	4592.3	35728.1	115988	50316	17926.6	7419.81	0	270.56	2620.59	2361.59	9757.83	1404.78	2033.49	3820.78	0	0	7609.03	24583.9	9399.13	58520.7	365499	78631	46552	6617.22	0	270.56	4426.55	2469.39	18498.8
P46783|RS10_HUMAN;A0A1W2PQS6|A0A1W2PQS6_HUMAN;Q9NQ39|RS10L_HUMAN	2	2	58	0.0528	0.020353	2.60294	0.574773	Competition	Probe	P46783	120362	125809	65375.2	25613.3	102267	95591.6	161712	56323.3	202998	184720	186740	174837	130664	3996.79	89938	24684.7	38364.7	83981.5	97475.9	160154	49874.2	33769.6	96019.5	165764	200012	115278	332500	582085	291826	454021	116530	7678.27	89938	41696	40116	159212
M0QYS1|M0QYS1_HUMAN;Q8J015|Q8J015_HUMAN;A0A096LPE0|A0A096LPE0_HUMAN;Q6NVV1|R13P3_HUMAN	5	4	216.54	0.0535444	0.0206069	1.7313	0.572179	Competition	Probe	M0QYS1	636457	538976	475147	541515	544922	789251	690079	843451	870180	805066	1.40226e+06	1.41869e+06	812201	171138	839485	225419	676582	757942	515440	686109	362486	713954	511634	1.36863e+06	853517	1.72631e+06	1.42531e+06	2.53691e+06	2.19138e+06	3.68407e+06	724347	328774	839485	380763	707468	1.4369e+06
P62241|RS8_HUMAN;Q5JR95|Q5JR95_HUMAN	11	10	632.83	0.0538969	0.0207094	1.47116	0.570962	Probe	Competition	P62241	9.71264e+06	1.19077e+07	9.01072e+06	1.13548e+07	1.02652e+07	1.32548e+07	9.38963e+06	3.19604e+06	8.1583e+06	9.30219e+06	9.41896e+06	1.1035e+07	1.02638e+07	1.31071e+07	1.10438e+07	1.58192e+07	9.90137e+06	1.41585e+07	7.86587e+06	1.51584e+07	6.8742e+06	1.49706e+07	9.63809e+06	2.29849e+07	1.16135e+07	6.54139e+06	1.33629e+07	2.93129e+07	1.47194e+07	2.8656e+07	9.15361e+06	2.51802e+07	1.10438e+07	2.67209e+07	1.03534e+07	2.68415e+07
Q01518|CAP1_HUMAN;Q5T0R1|Q5T0R1_HUMAN	6	6	334.31	0.0550662	0.021125	7.99379	0.566972	Competition	Control	Q01518	100527	75819.1	61639.2	19839.3	63387.4	60965.8	320744	25096	943151	460925	920966	384166	215016	1.13209e+06	274583	16284.9	141854	255430	81412.8	96516.6	47024	26156.8	59515.3	105720	396709	51364.4	1.54483e+06	1.45246e+06	1.43923e+06	997611	191758	2.17488e+06	274583	27507.4	148329	484243
F8W1I6|F8W1I6_HUMAN;F8VW18|F8VW18_HUMAN;H0YHL1|H0YHL1_HUMAN	2	2	67.66	0.0553163	0.0211872	8.85535	0.566128	Competition	Probe	F8W1I6	52822.7	3530.26	6195.95	4316.79	154865	6316.61	2487.52	159471	325324	51840.4	97580.1	152581	4744.4	55485.1	2750.31	2215.84	3500.61	20434.5	42778.9	4493.96	4726.84	5691.42	145405	10953.5	3076.66	326392	532862	163358	152493	396226	4231.21	106593	2750.31	3742.86	3660.41	38739.6
Q86XL3|ANKL2_HUMAN	2	2	111.35	0.0554944	0.0212216	9.76791	0.565529	Competition	Control	Q86XL3	1928.29	28339.1	1753.94	9770.07	0	0	40525.1	426.187	203022	16723.2	83313	64204.9	61720.9	4887.53	10645.2	24891.5	3065.17	2679.95	1561.65	36075.2	1338.07	12881.2	0	0	50123.1	872.284	332539	52697.8	130197	166729	55044.7	9389.48	10645.2	42045.2	3205.09	5080.63
P13473|LAMP2_HUMAN	2	2	115.25	0.0557555	0.0212876	1.4159	0.564653	Probe	Control	P13473	8784.95	92417.2	4977.49	11096.4	11032	605858	46170.6	78806.5	119085	239059	107100	165408	84685	121240	69740.7	489544	111607	162691	7114.57	117646	3797.29	14629.8	10358.1	1.05061e+06	57105.6	161295	195054	753317	167369	429533	75524.8	232916	69740.7	826908	116702	308428
J3KTE4|J3KTE4_HUMAN	2	2	92.28	0.0565212	0.021529	1.70681	0.562107	Probe	Competition	J3KTE4	1.34236e+06	1.06351e+06	1.55427e+06	1.96357e+06	1.10542e+06	788736	927845	1.35646e+06	908297	361173	1.09952e+06	1.95432e+06	1.50705e+06	1.8712e+06	1.50234e+06	2.8578e+06	1.38424e+06	2.15534e+06	1.08712e+06	1.35383e+06	1.18574e+06	2.58885e+06	1.0379e+06	1.36773e+06	1.14759e+06	2.77629e+06	1.48774e+06	1.13812e+06	1.71827e+06	5.07501e+06	1.34404e+06	3.59477e+06	1.50234e+06	4.82722e+06	1.44743e+06	4.08608e+06
P30086|PEBP1_HUMAN	4	4	111.26	0.0565926	0.021529	2.61884	0.561871	Competition	Control	P30086	84297.7	26735.6	77503.4	102488	56300.5	33919.5	254733	80769	103075	73383.9	392743	93715.2	147991	81390	83590.1	42370.6	73530.2	109981	68269.3	34034	59126.7	135124	52861.2	58819.1	315064	165311	168831	231246	613757	243361	131983	156359	83590.1	71569.8	76886.9	208501
D6RB85|D6RB85_HUMAN	6	1	257.09	0.0566564	0.021529	19.1716	0.56166	Competition	Control	D6RB85	2560.74	2113.99	2511.53	6033.49	2744.29	5022.97	23985.4	591.501	47035.3	14517.6	112287	203937	5993	41477.8	7748.97	3103.73	2561.27	6553.79	2073.84	2691.08	1916.03	7954.78	2576.65	8710.25	29666.1	1210.63	77041.3	45747.6	175476	529588	5344.75	79683.3	7748.97	5242.62	2678.2	12424.6
P35998|PRS7_HUMAN;C9JLS9|C9JLS9_HUMAN	3	3	122.61	0.0585757	0.0222232	5.37387	0.555418	Competition	Control	P35998	11046.1	3341.28	7646.29	5767.12	9207.86	3215.71	95936.2	21723.9	23294.2	15997.9	49391.8	9816.69	82823.1	24026.9	41672.9	1262.67	29627	9738	8945.81	4253.4	5833.3	7603.59	8645.38	5576.31	118658	44462.7	38154.6	50412.3	77186.7	25492.2	73864.3	46158.4	41672.9	2132.83	30979.5	18461.2
A0A0A0MRI2|A0A0A0MRI2_HUMAN	1	1	49.69	0.0586786	0.0222272	10.5232	0.555089	Competition	Probe	A0A0A0MRI2	104.908	5617.03	54.4576	10963.7	27.451	19835.2	24051.1	30368.1	207.379	32633.6	108053	133979	0	0	8564.4	0	4297.12	18430.6	84.9605	7150.4	41.5453	14454.9	25.7741	34396	29747.4	62154.8	339.676	102834	168858	347920	0	0	8564.4	0	4493.28	34940.6
Q8TC12|RDH11_HUMAN	1	1	90.01	0.0592845	0.0224214	8.10215	0.553158	Competition	Probe	Q8TC12	37371.1	411489	8627.78	73995.4	8979	49456.7	64617.5	93418.3	85733.4	192270	178164	58034.3	6576.08	40984.9	18193.2	7899.8	0	9316.23	30265.3	523819	6582.06	97558.3	8430.5	85762	79921.4	191201	140427	605878	278424	150705	5864.76	78736.5	18193.2	13343.9	0	17661.6
Q9C0H2|TTYH3_HUMAN	1	1	76.67	0.0597694	0.0225693	15.8545	0.551625	Probe	Control	Q9C0H2	0.490838	4894.59	138.472	3478.13	2279.17	11406.4	5064.69	2931.51	633.663	291.052	10115.1	9352.54	131327	2295.34	127326	4073.48	70251.8	16651.4	0.397509	6230.74	105.639	4585.69	2139.94	19779.7	6264.2	5999.97	1037.91	917.159	15807.3	24286.8	117122	4409.61	127326	6880.68	73458.8	31567.5
H0YKD8|H0YKD8_HUMAN;H0YMF4|H0YMF4_HUMAN;H0YLP6|H0YLP6_HUMAN	7	7	308.64	0.0599009	0.0225835	1.79149	0.551211	Control	Competition	H0YKD8	1.81924e+06	1.56681e+06	1.76744e+06	2.64348e+06	1.65179e+06	1.97491e+06	1.33532e+06	1.85544e+06	1.03569e+06	438653	1.63883e+06	72712	1.86183e+06	1.33637e+06	1.73394e+06	2.03398e+06	2.02659e+06	2.02578e+06	1.47333e+06	1.99453e+06	1.34837e+06	3.48527e+06	1.55089e+06	3.42465e+06	1.65157e+06	3.79755e+06	1.6964e+06	1.38228e+06	2.56108e+06	188820	1.66044e+06	2.56732e+06	1.73394e+06	3.43568e+06	2.11911e+06	3.84046e+06
P25786|PSA1_HUMAN;F5GX11|F5GX11_HUMAN;B4DEV8|B4DEV8_HUMAN	4	4	196.12	0.0607423	0.0228649	3.48358	0.548581	Competition	Probe	P25786	162195	85227.1	287698	32618.2	151674	164026	208261	54532.7	315528	673876	219937	610327	66670.3	79915	221713	47130.2	43489.6	138876	131355	108493	219483	43005.1	142408	284435	257585	111613	516817	2.12351e+06	343706	1.58491e+06	59458.8	153525	221713	79609.5	45474.9	263281
R4GMN1|R4GMN1_HUMAN;R4GMW5|R4GMW5_HUMAN	3	3	118.8	0.061089	0.0229595	2.87207	0.547507	Competition	Control	R4GMN1	27639.1	26885.8	18115.6	49816.5	18773.4	33817.8	54195.4	17511.7	71793.1	100429	78874.3	179947	73293.6	37755.3	32156	111989	34261.6	23329.5	22383.8	34225.3	13820.3	65679.8	17626.5	58642.8	67031	35841.5	117593	316470	123260	467290	65365.6	72532	32156	189165	35825.7	44227.8
A0A3B3IRQ9|A0A3B3IRQ9_HUMAN;A0A3B3ISX1|A0A3B3ISX1_HUMAN;A0A3B3ITG9|A0A3B3ITG9_HUMAN;A0A3B3ISU1|A0A3B3ISU1_HUMAN	5	4	150.68	0.0612667	0.0229904	2.28455	0.546959	Competition	Control	A0A3B3IRQ9	206590	70852.1	76311.4	103086	132622	134186	155895	368289	399549	452621	203571	73281.3	225891	311345	194598	129720	167507	166123	167308	90193.7	58217.4	135913	124520	232689	192817	753783	654440	1.42629e+06	318130	190298	201457	598128	194598	219115	175153	314936
Q09028|RBBP4_HUMAN;E9PIC4|E9PIC4_HUMAN	3	2	210.81	0.0614528	0.0230243	2.75259	0.546386	Competition	Control	Q09028	52456.7	26255.2	69414.8	56764.6	57955.7	39009.2	114971	21840.9	245659	158363	160247	129806	114375	71525.9	103557	75705.1	43074	58167.6	42482.5	33422.5	52956	74840.5	54415.4	67645.1	142201	44702.2	402376	499030	250425	337083	102003	137409	103557	127876	45040.3	110274
J3KQ48|J3KQ48_HUMAN	4	4	289.78	0.0616974	0.0230651	5.28238	0.545635	Competition	Control	J3KQ48	4501.01	3713.1	22490.7	4383.04	7128.49	179685	206062	49117.9	246015	5160.76	393268	272545	76839.7	52794.1	59897.7	1903.92	26735.6	7659.83	3645.18	4726.72	17158	5778.77	6693.03	311589	254865	100530	402959	16262.5	614576	707750	68528.1	101423	59897.7	3215.99	27956	14521.5
P07954|FUMH_HUMAN	1	1	34.06	0.0617536	0.0230651	30.2085	0.545463	Competition	Control	P07954	19455.8	4499.39	4099.9	1896.7	7910.92	42830.4	148873	1.35505e+06	203852	232328	292649	204873	51275.1	0	92875.4	0	89164.3	65187.8	15756.4	5727.67	3127.78	2500.68	7427.66	74271.5	184131	2.77339e+06	333898	732109	457336	532019	45728.8	0	92875.4	0	93234.7	123583
P30041|PRDX6_HUMAN	4	4	142.91	0.0620367	0.0231349	10.7248	0.544598	Competition	Control	P30041	114713	42397	47349.2	50036.9	74804.8	5281.43	574469	738202	90724.3	12997.7	869108	1.30282e+06	299443	32407.7	237879	52899.7	205590	299679	92901.1	53970.8	36122.4	65970.4	70235.2	9158.43	710525	1.51089e+06	148601	40958.1	1.35819e+06	3.38318e+06	267053	62258.8	237879	89354.9	214975	568130
H0YLF3|H0YLF3_HUMAN	1	1	41.99	0.0623599	0.0232195	4.94269	0.543615	Competition	Control	H0YLF3	14243	53852.3	174717	61262.1	14639.6	158792	268819	66842.8	853567	64103.6	789663	317170	378137	38251.7	316917	261939	153602	51945.4	11534.9	68553.2	133290	80770.2	13745.3	275359	332485	136808	1.3981e+06	202002	1.23404e+06	823633	337235	73485.7	316917	442452	160614	98477.7
Q9HDC9|APMAP_HUMAN;H0Y512|H0Y512_HUMAN	2	2	58.94	0.0644111	0.0239462	3.69627	0.537477	Competition	Control	Q9HDC9	59297.9	36684.8	69193.4	29772.3	61975.7	14727.9	129895	27488.4	347716	135371	170019	193612	98737.3	142690	87814.7	8963.98	46588.9	9232.53	48022.9	46699.2	52787.1	39252.9	58189.8	25539.4	160659	56261	569539	426578	265696	502774	88057.1	274123	87814.7	15141.4	48715.7	17503
H7C3P7|H7C3P7_HUMAN;C9J6B1|C9J6B1_HUMAN	3	3	155.41	0.0651981	0.0242013	3.88252	0.535168	Competition	Control	H7C3P7	39355.3	28189.2	44764	31207.7	39234.6	51281.1	48198.6	61256.8	79198.4	317757	51540.6	350681	57353.7	141805	46044.8	71030.4	24779.1	11987.2	31872.2	35884.5	34150.1	41145.3	36837.8	88925.6	59613.9	125375	129723	1.00131e+06	80544.7	910656	51149.9	272423	46044.8	119980	25910.3	22725.2
A0A0C4DFQ1|A0A0C4DFQ1_HUMAN	3	3	105.57	0.0655545	0.0242961	15.5182	0.53413	Competition	Control	A0A0C4DFQ1	12822.2	6088.03	17003.5	204.636	1195.41	3893.87	13035.2	12753.2	1551.46	212216	134022	265892	17027.4	19115.5	5591.31	17594.3	6094.78	1610.91	10384.2	7749.98	12971.8	269.8	1122.39	6752.3	16122.5	26102.1	2541.21	668731	209442	690473	15185.6	36723	5591.31	29719.2	6373.01	3053.96
Q02818|NUCB1_HUMAN;C9JKZ2|C9JKZ2_HUMAN;H7BZI1|H7BZI1_HUMAN;C9J3C1|C9J3C1_HUMAN	10	10	400.72	0.0667136	0.0246877	2.98779	0.53079	Competition	Control	Q02818	67630.4	151087	69256.1	198487	76978.4	168518	147847	313021	412258	414132	487023	412650	56405.3	1.22767e+06	80090.9	363240	83979.8	126362	54771	192332	52835	261693	72276	292223	182863	640665	675256	1.305e+06	761092	1.07158e+06	50304.1	2.35848e+06	80090.9	613563	87813.5	239555
Q9Y305|ACOT9_HUMAN;H7C5Q2|H7C5Q2_HUMAN;C9J7L8|C9J7L8_HUMAN	5	5	153.78	0.0670562	0.0247763	2.47367	0.529812	Competition	Control	Q9Y305	52135.3	36627.8	73124.1	25769.6	67959.7	89363.2	104567	72631.6	280853	65930.6	276545	52839.7	96635.7	36077.6	89290.5	56496.8	57368	52449.3	42222.2	46626.7	55785.8	33975.6	63808.2	154963	129332	148656	460021	207759	432168	137215	86182.9	69309.1	89290.5	95430.9	59986.9	99433.1
P23284|PPIB_HUMAN	7	7	469.95	0.0677364	0.0249893	15.3394	0.527885	Competition	Control	P23284	3.94237e+06	5.18887e+06	3.58998e+06	4.89763e+06	3.57875e+06	5.01371e+06	4.97339e+06	5.76697e+06	5.14436e+06	2.05373e+08	5.40748e+06	1.75401e+08	4.57817e+06	5.95848e+06	4.21733e+06	5.53206e+06	3.43939e+06	4.21857e+06	3.19276e+06	6.60536e+06	2.73877e+06	6.45722e+06	3.36014e+06	8.69419e+06	6.15128e+06	1.18033e+07	8.42619e+06	6.47168e+08	8.4505e+06	4.55483e+08	4.08296e+06	1.14469e+07	4.21733e+06	9.34441e+06	3.5964e+06	7.99753e+06
P20020|AT2B1_HUMAN;E7ERY9|E7ERY9_HUMAN	3	2	84.12	0.0683666	0.0251831	2.56933	0.526114	Competition	Probe	P20020	87580.8	36855.4	106306	68481	69769.4	436553	93933	106993	199296	354545	126376	292813	80813.5	58292.4	64950.7	61923.2	90076.2	100856	70928.1	46916.4	81100.2	90287.9	65507.4	757019	116180	218984	326436	1.11723e+06	197494	760383	72072.1	111986	64950.7	104597	94188.1	191201
P61224|RAP1B_HUMAN;A6NIZ1|RP1BL_HUMAN;E7ESV4|E7ESV4_HUMAN;B7ZB78|B7ZB78_HUMAN;F5H004|F5H004_HUMAN;P62834|RAP1A_HUMAN;A0A075B6Q0|A0A075B6Q0_HUMAN	5	5	222.47	0.0687686	0.0252925	2.2522	0.524993	Competition	Control	P61224	341586	93176.9	201023	158582	170612	65381.7	201362	267900	329232	570540	509820	441724	203982	1.02719e+06	326243	250995	131253	121878	276637	118613	153359	209080	160190	113377	249052	548316	539264	1.79788e+06	796717	1.14708e+06	181918	1.97335e+06	326243	423966	137244	231056
A0A096LNZ9|A0A096LNZ9_HUMAN	5	5	388.51	0.0691702	0.0254014	3.20311	0.523878	Competition	Control	A0A096LNZ9	740544	285302	594752	597217	718953	1.00101e+06	1.56731e+06	389448	1.48786e+06	5.26044e+06	2.50924e+06	1.39882e+06	1.3591e+06	600468	930899	3.28454e+06	783589	717071	599736	363186	453731	787392	675034	1.73583e+06	1.93851e+06	797091	2.43704e+06	1.65766e+07	3.92129e+06	3.63249e+06	1.21209e+06	1.15356e+06	930899	5.54805e+06	819360	1.35942e+06
Q9ULV4|COR1C_HUMAN;B4E3S0|B4E3S0_HUMAN;F8VRE9|F8VRE9_HUMAN;H0YHL7|H0YHL7_HUMAN	3	3	147.61	0.0692793	0.0254026	2.60802	0.523576	Competition	Control	Q9ULV4	20812.8	34260	28363.5	2119.34	8591.24	2576.53	4657.93	35001.6	49554.5	83859.1	56929.4	22254.2	54460.1	29482.6	33072.4	36377.2	26779.7	28078.5	16855.4	43612.5	21638.3	2794.22	8066.42	4467.91	5761.11	71638.4	81167.6	264255	88966.1	57790.2	48569.3	56639.4	33072.4	61446.2	28002.2	53231
A0A087WUZ3|A0A087WUZ3_HUMAN;F8W6C1|F8W6C1_HUMAN	7	6	316.14	0.0698078	0.0255575	10.0684	0.52212	Competition	Control	A0A087WUZ3	23796	3477.66	563.858	4128.7	2730.96	0	40636.7	4112.45	78666	42345.9	164740	18843.1	14.0885	8273.01	23743.1	3629.36	902.501	1578.91	19271.4	4427.02	430.163	5443.44	2564.14	0	50261.1	8417.02	128851	133440	257446	48932.1	12.5646	15893.4	23743.1	6130.5	943.701	2993.28
A0A087WYV6|A0A087WYV6_HUMAN	1	1	54.66	0.0700261	0.0255984	5.02218	0.521521	Probe	Control	A0A087WYV6	26181.4	6017.61	35470.7	3044.7	17239.9	1345.03	22317.6	75576.9	13035.4	122433	55861.4	86832.6	24611.3	171644	102779	2102.86	113566	33773.9	21203.2	7660.34	27060.3	4014.24	16186.7	2332.4	27603.2	154684	21351.2	385809	87297.1	225489	21949.2	329746	102779	3552.03	118750	64028.3
F8W6I7|F8W6I7_HUMAN;A0A2R8Y4L2|A0A2R8Y4L2_HUMAN;F8VTQ5|F8VTQ5_HUMAN;F8VZ49|F8VZ49_HUMAN;Q32P51|RA1L2_HUMAN;H0YH80|H0YH80_HUMAN;F8VYN5|F8VYN5_HUMAN;F8W646|F8W646_HUMAN	11	9	735.44	0.0705601	0.0257197	1.90212	0.520064	Competition	Control	F8W6I7	1.20762e+06	868312	1.06599e+06	836946	1.11306e+06	650838	2.59809e+06	1.1306e+06	2.9495e+06	914989	2.11265e+06	1.21759e+06	1.41554e+06	322738	1.57014e+06	318316	1.16638e+06	1.00165e+06	977998	1.10535e+06	813233	1.10346e+06	1.04507e+06	1.12861e+06	3.21341e+06	2.31403e+06	4.83112e+06	2.8833e+06	3.30152e+06	3.16187e+06	1.26242e+06	620016	1.57014e+06	537680	1.21963e+06	1.89893e+06
P04264|K2C1_HUMAN;F8VP67|F8VP67_HUMAN;A0A1W2PRT3|A0A1W2PRT3_HUMAN	52	43	5653.31	0.0705718	0.0257197	1.61618	0.520032	Control	Competition	P04264	3.0717e+08	3.06409e+08	1.82234e+08	2.13061e+08	3.40425e+08	3.90732e+08	2.0869e+08	3.12557e+08	1.38124e+08	1.92176e+08	1.04166e+08	1.20917e+08	3.55666e+08	4.37442e+08	1.47857e+08	1.79987e+08	2.16577e+08	2.83297e+08	2.48764e+08	3.90054e+08	1.39025e+08	2.80908e+08	3.1963e+08	6.77562e+08	2.58115e+08	6.39715e+08	2.26239e+08	6.05582e+08	1.62785e+08	3.14e+08	3.17195e+08	8.40375e+08	1.47857e+08	3.04023e+08	2.26464e+08	5.37073e+08
H0Y449|H0Y449_HUMAN;C9J5V9|C9J5V9_HUMAN;A0A0D9SEI8|A0A0D9SEI8_HUMAN	9	8	524.1	0.0708234	0.0257724	2.8119	0.519349	Control	Competition	H0Y449	804322	490004	460481	429178	485654	131411	394244	48588.9	284175	11063.3	226676	31396.2	175592	37034.4	358340	8918.3	374783	61279	651387	623768	351297	565844	455987	227877	487616	99447.7	465462	34862.4	354236	81530.1	156598	71147.1	358340	15064.3	391892	116172
Q70UQ0|IKIP_HUMAN	3	2	105.07	0.0710602	0.0258195	7.50171	0.518708	Competition	Control	Q70UQ0	35779.8	20398.9	10645.5	38838.5	22978.1	11647.5	4686.28	17682.3	175964	276289	168766	409015	85140.6	7548.54	13915.8	34240.9	6775.78	3723.59	28976.6	25967.6	8121.36	51206.2	21574.4	20197.7	5796.17	36190.6	288219	870638	263738	1.06214e+06	75931.2	14501.6	13915.8	57837.7	7085.09	7059.16
P11142|HSP7C_HUMAN;E9PKE3|E9PKE3_HUMAN;E9PN89|E9PN89_HUMAN;E9PNE6|E9PNE6_HUMAN;E9PLF4|E9PLF4_HUMAN;E9PK54|E9PK54_HUMAN;A8K7Q2|A8K7Q2_HUMAN;E9PI65|E9PI65_HUMAN;E9PPY6|E9PPY6_HUMAN;E9PN25|E9PN25_HUMAN;P54652|HSP72_HUMAN;E9PS65|E9PS65_HUMAN;E9PM13|E9PM13_HUMAN	27	22	2153.07	0.0712652	0.0258549	1.67139	0.518155	Competition	Control	P11142	3.6045e+06	2.34528e+06	3.00205e+06	2.81032e+06	4.44643e+06	2.90458e+06	5.45145e+06	4.26527e+06	3.46844e+06	4.76205e+06	8.03694e+06	5.9615e+06	5.06852e+06	4.20943e+06	4.59763e+06	1.59336e+06	5.54686e+06	5.2796e+06	2.91913e+06	2.98551e+06	2.29024e+06	3.70523e+06	4.17482e+06	5.03678e+06	6.74256e+06	8.72979e+06	5.68111e+06	1.50061e+07	1.25597e+07	1.54809e+07	4.52027e+06	8.08677e+06	4.59763e+06	2.69141e+06	5.80007e+06	1.0009e+07
A6NLH6|A6NLH6_HUMAN	1	1	40.46	0.0714905	0.0258976	3.92613	0.517549	Competition	Control	A6NLH6	66459.1	38458.5	22838.3	101615	58071.9	19343.6	27631.4	119879	271458	400816	188026	196674	57735	49765.5	71448	11351.7	294054	98114.5	53822.5	48957.2	17423.2	133973	54524.5	33543.4	34175.6	245358	444633	1.26304e+06	293836	510728	51490	95605	71448	19174.7	307478	186005
Q99808|S29A1_HUMAN	1	1	65.48	0.0716108	0.0259022	249.24	0.517225	Competition	Control	Q99808	0	0	0	958.999	0	0	17737.8	1926.83	104526	0	114831	0	814.419	586.898	0	0	0	0	0	0	0	1264.38	0	0	21938.8	3943.68	171208	0	179451	0	726.325	1127.5	0	0	0	0
A0A3B3ITP9|A0A3B3ITP9_HUMAN	1	1	47.86	0.0723211	0.0261198	27.8126	0.515328	Competition	Control	A0A3B3ITP9	379.171	0	5712.67	7710.66	3495.83	587.841	107583	14946.8	171456	141089	18259.7	44126.5	12608.8	0	23261.6	15090.2	13497.1	23428	307.075	0	4358.15	10166	3282.28	1019.36	133063	30591.9	280835	444598	28535.3	114588	11244.9	0	23261.6	25489.5	14113.3	44414.6
Q9P2J5|SYLC_HUMAN	5	4	209.8	0.0726792	0.0262098	3.0011	0.514377	Competition	Control	Q9P2J5	41459.3	34030.9	9012.1	81014.9	46220.4	152675	85436.8	596949	125907	72270.5	103950	109124	24456.1	52367.2	32752.9	98100.2	56704	136125	33576.2	43320.9	6875.26	106813	43396.9	264751	105672	1.22178e+06	206229	227738	162447	283376	21810.7	100603	32752.9	165705	59292.5	258065
A0A0A0MRM8|A0A0A0MRM8_HUMAN	1	1	49.15	0.0732352	0.0263635	56.4103	0.51291	Competition	Control	A0A0A0MRM8	2.72609	621.019	6.67953	1778.36	964.777	0	32531	6.07544	17228.2	53517.8	45885.9	41134.6	31007.3	16470.1	17142.8	0	8269.77	9077.03	2.20774	790.549	5.09576	2344.65	905.842	0	40235.6	12.4347	28218.8	168644	71708	106819	27653.3	31640.9	17142.8	0	8647.28	17208.2
A0A0B4J207|A0A0B4J207_HUMAN	1	1	34.09	0.0733246	0.0263635	248.689	0.512675	Competition	Control	A0A0B4J207	0	0	0	0	25.3086	1273.79	58425.6	0	70020.8	0	193146	1478.62	0	0	0	6118.17	0	0	0	0	0	0	23.7626	2208.86	72263	0	114690	0	301838	3839.71	0	0	0	10334.4	0	0
U3KQT1|U3KQT1_HUMAN	2	2	93.35	0.073586	0.026418	3.76082	0.51199	Competition	Control	U3KQT1	35946.8	31760.2	5293.12	19111.1	7843.71	36938.1	48229.8	19200.5	121387	138037	86232.9	101743	96685	130274	23808.1	35365.7	4340.22	64220.9	29111.9	40430.3	4038.08	25196.7	7364.56	64053.7	59652.5	39298	198826	434980	134760	264207	86226.9	250270	23808.1	59737.6	4538.35	121750
I3L1E8|I3L1E8_HUMAN	1	1	110.55	0.0737726	0.0264455	4.24961	0.511501	Competition	Probe	I3L1E8	28437	60853.7	17251.1	3344.92	32198.5	22615.4	41845.1	25491.5	89801.2	260893	168668	18114.9	22414.1	4963.94	26589.8	9595.34	38837.7	39921.3	23029.9	77465.9	13160.7	4410.07	30231.6	39216.9	51755.7	52173.9	147089	822122	263585	47041	19989.6	9536.27	26589.8	16207.9	40610.6	75682.6
J3KPF3|J3KPF3_HUMAN;H0YFS2|H0YFS2_HUMAN;F5GZI0|F5GZI0_HUMAN;F5H0E2|F5H0E2_HUMAN;F5H867|F5H867_HUMAN	4	4	199.36	0.0742445	0.0265751	2.67498	0.510272	Competition	Control	J3KPF3	74652.2	7164.16	63452	116334	50366.9	69139.7	68862.8	143110	249932	293275	100641	163637	208115	89126.4	134462	30663.3	95433	31957	60457.8	9119.88	48407.1	153379	47290.1	119894	85172.2	292906	409374	924164	157276	424935	185603	171221	134462	51794.6	99789.5	60583.9
E7EPB3|E7EPB3_HUMAN	3	3	184.88	0.0745953	0.026661	1.92595	0.509363	Control	Competition	E7EPB3	1.88291e+06	1.74567e+06	1.94786e+06	2.49237e+06	949873	823023	648534	1.89803e+06	403952	356383	1.32503e+06	478139	2.14422e+06	845269	1.78388e+06	2.08604e+06	1.57241e+06	484106	1.52489e+06	2.22221e+06	1.48601e+06	3.28604e+06	891848	1.42719e+06	802132	3.88473e+06	661652	1.12303e+06	2.07067e+06	1.24164e+06	1.91228e+06	1.62385e+06	1.78388e+06	3.52361e+06	1.64419e+06	917765
Q13217|DNJC3_HUMAN	1	1	56.06	0.0774487	0.0276397	Infinity	0.502109	Competition	Control	Q13217	0	0	0	0	0	0	111866	0	112647	0	173112	0	7154.45	0	0	0	0	0	0	0	0	0	0	0	138361	0	184510	0	270529	0	6380.57	0	0	0	0	0
P41250|GARS_HUMAN	3	3	97.99	0.0813534	0.0289902	22.7889	0.492569	Competition	Control	P41250	9054.39	725.279	6230.62	1835.72	2599.8	172.906	66357	1123.88	189302	44490.5	166203	2400.28	23204.2	1444.69	24203.6	89.578	4381.3	6244.26	7332.78	923.27	4753.29	2420.28	2440.99	299.833	82072.9	2300.27	310067	140198	259733	6233.09	20694.2	2775.41	24203.6	151.31	4581.3	11837.8
A0A494C0R8|A0A494C0R8_HUMAN;O75153|CLU_HUMAN;I3L318|I3L318_HUMAN	12	11	586.58	0.0815564	0.0290195	1.92018	0.492085	Competition	Control	A0A494C0R8	142785	381538	166917	1.32431e+06	497300	3.28216e+06	1.36885e+06	2.12929e+06	1.3006e+06	1.82244e+06	1.91214e+06	2.59412e+06	813958	2.29989e+06	552701	2.51872e+06	263813	1.83506e+06	115636	485693	127339	1.74601e+06	466921	5.69154e+06	1.69305e+06	4.35806e+06	2.1303e+06	5.74285e+06	2.98819e+06	6.73647e+06	725914	4.41834e+06	552701	4.25448e+06	275856	3.47889e+06
G3V279|G3V279_HUMAN	1	1	43.52	0.0821577	0.0291272	1.61176	0.490657	Probe	Control	G3V279	58544.4	107401	370164	107059	59444.9	21482.4	231338	279516	157473	185606	135558	134513	293803	144033	103564	247653	273414	104598	47412.7	136720	282395	141150	55813.6	37252.3	286128	572089	257932	584877	211842	349306	262023	276704	103564	418321	285895	198297
P20700|LMNB1_HUMAN;A0A0D9SFE5|A0A0D9SFE5_HUMAN;A0A0D9SFY5|A0A0D9SFY5_HUMAN	4	4	157.48	0.0822104	0.0291272	9.21752	0.490532	Competition	Control	P20700	6605.67	15779.4	8933.31	0	4027.71	7997.98	70054.7	24371.1	121859	5330.37	122169	55741.2	23525.4	19798.7	7725.8	18787.7	6136.04	21117.1	5349.66	20087	6815.15	0	3781.66	13869.2	86646.3	49880.7	199598	16797	190919	144750	20980.7	38035.4	7725.8	31735	6416.15	40033.7
P17302|CXA1_HUMAN	2	2	60.91	0.0822222	0.0291272	8.274	0.490504	Competition	Control	P17302	23967.7	4881.11	24406.1	4366.18	17145.3	6666.5	72673	45066.9	219265	127626	207987	1158.39	138853	119387	103330	8604.8	68731.1	41114.2	19410.5	6213.58	18619.3	5756.54	16097.9	11560.3	89884.8	92239.1	359145	402172	325030	3008.13	123834	229355	103330	14534.7	71868.7	77943.9
P02538|K2C6A_HUMAN;P48668|K2C6C_HUMAN;O95678|K2C75_HUMAN	26	3	1502.92	0.0825329	0.0291942	3.16059	0.48977	Control	Competition	P02538	758881	603427	848743	943919	392155	68382.7	524049	44215.8	291330	65967.8	156771	61601.2	499526	152065	208118	80879.8	382092	605724	614586	768154	647499	1.2445e+06	368199	118581	648164	90497.2	477182	207877	244993	159967	445493	292133	208118	136617	399534	1.14833e+06
G3V1C3|G3V1C3_HUMAN;E9PQK6|E9PQK6_HUMAN;H0YER7|H0YER7_HUMAN	3	3	120.66	0.0827677	0.0292343	12.848	0.489218	Competition	Control	G3V1C3	6741.66	10668	3598.53	825.029	3746.89	2515.78	25196.7	729.949	139661	15756.3	162312	17319.1	37056.8	4949.64	30907.2	12604.9	4243.38	26777.8	5459.79	13580.2	2745.29	1087.75	3518.01	4362.58	31164.3	1494	228758	49651.1	253652	44974.4	33048.5	9508.8	30907.2	21291.5	4437.09	50765.1
P04844|RPN2_HUMAN;Q5JYR4|Q5JYR4_HUMAN;F2Z3K5|F2Z3K5_HUMAN;H0Y5M1|H0Y5M1_HUMAN	7	7	348.52	0.0829623	0.0292601	2.7625	0.488761	Competition	Probe	P04844	345734	97508.8	93908.6	75467.1	209591	80465.2	464580	260318	271751	64466.6	944211	425900	292318	66001.2	192559	42268.4	155475	131460	279996	124127	71642.1	99498.6	196788	139533	574611	532796	445113	203146	1.47556e+06	1.10598e+06	260698	126795	192559	71397.2	162572	249221
A0A286YEX5|A0A286YEX5_HUMAN	1	1	44.19	0.0832066	0.0293033	Infinity	0.488188	Competition	Control	A0A286YEX5	0	0	0	0	0	0	0	53585.3	0	0	10458.1	136772	0	0	0	4024.85	0	0	0	0	0	0	0	0	0	109674	0	0	16343.3	355171	0	0	0	6798.53	0	0
R4GMT0|R4GMT0_HUMAN;A0A1B0GVS3|A0A1B0GVS3_HUMAN	3	3	96.5	0.0837922	0.0294664	3.56046	0.486823	Competition	Control	R4GMT0	43035.4	28343.9	68139.4	234965	45845.9	199473	69507.8	535754	568379	634091	316874	82177.2	49640.9	358856	42688.9	298453	36599.3	85841.9	34852.6	36081.4	51983	309787	43045.3	345903	85969.9	1.09654e+06	930973	1.99814e+06	495192	213399	44271.4	689401	42688.9	504128	38270.1	162738
B4DT28|B4DT28_HUMAN;A0A286YEZ8|A0A286YEZ8_HUMAN	5	3	146.08	0.0848552	0.0297966	3.64853	0.484367	Competition	Probe	B4DT28	26950.9	13885.2	6697.53	22084.1	3824	31597.9	18289	21746.9	5815.2	50448.7	74357.8	77439.6	6552.16	26341.6	3328.73	16714.1	3060.52	12002.1	21826.4	17675.7	5109.5	29116.5	3590.4	54793.3	22620.5	44509.7	9524.98	158973	116202	201096	5843.43	50605	3328.73	28232.4	3200.23	22753.5
O75306|NDUS2_HUMAN	1	1	38.93	0.0861235	0.0301979	58.5481	0.481473	Competition	Control	O75306	2646.44	0	0	0	2373.97	0	22691.9	55649.4	75781.4	9235.13	130578	0	8244.32	11140.8	5.79064	19581.1	0	0	2143.24	0	0	0	2228.95	0	28066.2	113899	124126	29101.6	204060	0	7352.55	21402.7	5.79064	33075.2	0	0
Q9UIQ6|LCAP_HUMAN	3	3	123.98	0.0864297	0.0302612	6.14588	0.480781	Competition	Control	Q9UIQ6	59671.4	29808	46409.9	21027.6	17243.7	35388.3	28463	36231.7	520388	248731	432073	21975	72749.3	75531.1	53225	103647	90215.3	99058.9	48325.4	37945.1	35405.7	27723.5	16190.3	61366.3	35204.1	74156.1	852367	783796	675219	57065.2	64880.2	145103	53225	175075	94333.6	187795
A0A286YER3|A0A286YER3_HUMAN	1	1	61.82	0.0876427	0.0306413	7.84337	0.478059	Competition	Control	A0A286YER3	12342	17455.3	885.029	9466.69	24128.2	21084	109076	35666.6	150960	166884	200430	6503.81	53339	16886.9	59738.9	243.988	7393.41	27371.3	9995.31	22220.4	675.181	12481.2	22654.3	36561.3	134909	72999.4	247264	525881	313221	16889.2	47569.4	32441.6	59738.9	412.129	7730.92	51890.4
P39748|FEN1_HUMAN;F5H1Y3|F5H1Y3_HUMAN;I3L3E9|I3L3E9_HUMAN	4	4	181.7	0.0914107	0.0319122	4.23106	0.469826	Competition	Control	P39748	19680.4	18903.6	38473	18572.2	41533	46964.2	37537.3	101601	124094	306131	56603.9	153082	95144.6	1375.79	81090.9	35839.5	27149.4	88366.8	15938.4	24064.1	29350.7	24486.3	38995.9	81439.9	46427.6	207949	203259	964675	88457.4	397526	84853	2643.04	81090.9	60537.9	28388.8	167525
P55060|XPO2_HUMAN	18	18	796.47	0.0919782	0.0320559	4.13969	0.468614	Competition	Control	P55060	268632	73991	183546	65137.5	214578	39748	585954	62206	1.23383e+06	318689	1.16447e+06	135501	257562	121893	357849	154221	359895	232572	217554	94189.4	140026	85879.7	201470	68926.3	724730	127318	2.02095e+06	1.00425e+06	1.81976e+06	351873	229702	234170	357849	260500	376324	440908
J3KPX7|J3KPX7_HUMAN;F5GWA7|F5GWA7_HUMAN;F5H0C5|F5H0C5_HUMAN	4	3	182.4	0.0920889	0.0320559	7.22986	0.468378	Competition	Probe	J3KPX7	4865.86	7235.77	1983.74	3439.57	4710.52	331892	16780.8	51179.1	139464	151560	151480	3012.32	5827.18	47413.1	7095.28	478.496	3524.28	6683.17	3940.66	9211.04	1513.38	4534.86	4422.77	575528	20755.1	104749	228435	477592	236725	7822.45	5196.87	91085.8	7095.28	808.246	3685.17	12669.9
Q12906|ILF3_HUMAN;K7EKJ9|K7EKJ9_HUMAN;K7ER69|K7ER69_HUMAN;K7EJ09|K7EJ09_HUMAN;K7EKY0|K7EKY0_HUMAN;K7EQR9|K7EQR9_HUMAN	6	6	193.67	0.0935794	0.0325151	2.86492	0.465232	Competition	Control	Q12906	130344	102589	117870	114990	140719	99771.7	366394	112046	619885	235419	483746	205954	325520	43001	178716	550291	101604	37963.8	105560	130594	89921.9	151607	132123	173012	453170	229326	1.01534e+06	741846	755971	534826	290309	82609.7	178716	929518	106242	71971.6
I3L2G1|I3L2G1_HUMAN	1	1	66.12	0.0936783	0.0325151	11.4632	0.465024	Competition	Control	I3L2G1	3374.27	2328.84	0	4153.65	1635.41	4209.17	13195.9	69295.6	50023.7	2140.43	16156.5	29175.1	2450.73	0	0	7778.53	1634.2	7284.97	2732.68	2964.58	0	5476.33	1535.51	7299.05	16321.2	141828	81936	6744.89	25248.5	75762.4	2185.64	0	0	13139	1708.8	13810.8
B0QY95|B0QY95_HUMAN	1	1	37.05	0.0938451	0.0325261	1.98441	0.464676	Control	Probe	B0QY95	2.04668e+06	2.80393e+06	1.95927e+06	3.67049e+06	2.80852e+06	4.91248e+06	2.37244e+06	4.05608e+06	677460	1.3508e+06	624395	1.14065e+06	982541	2.22294e+06	1.63893e+06	3.47579e+06	192934	659067	1.65752e+06	3.56937e+06	1.49471e+06	4.83931e+06	2.63695e+06	8.51864e+06	2.93433e+06	8.30164e+06	1.10964e+06	4.25661e+06	975769	2.96205e+06	876262	4.27051e+06	1.63893e+06	5.87109e+06	201741	1.24945e+06
Q92538|GBF1_HUMAN	1	1	84.96	0.0964472	0.033369	3193.76	0.459308	Competition	Probe	Q92538	7166.42	35.4624	0	518.884	0	11355.1	3209.83	0	21090.9	0	17640.5	143175	0	19.9121	0	0	0	38.0497	5803.79	45.1432	0	684.116	0	19690.6	3970.05	0	34545.7	0	27567.6	371799	0	38.2533	0	0	0	72.1344
A0A3B3IRK6|A0A3B3IRK6_HUMAN;C9J8D4|C9J8D4_HUMAN;A0A3B3IS52|A0A3B3IS52_HUMAN	3	3	99.38	0.0965548	0.033369	6.54846	0.459089	Competition	Probe	A0A3B3IRK6	23480.5	6753.28	16408.6	26962.1	7174.47	22251	10333.5	16485.9	46613.4	206969	12284.1	284999	17861.5	5587.95	4471.57	19061.4	8568.6	32666	19015.9	8596.83	12518	35547.8	6736.21	38585	12780.9	33741.9	76350.2	652197	19196.9	740091	15929.4	10735.1	4471.57	32197.4	8959.76	61928
H0Y3V8|H0Y3V8_HUMAN	1	1	39.91	0.0980218	0.0338274	9.74727	0.456127	Competition	Control	H0Y3V8	23329.9	2421.21	2598.37	6399.55	117.243	0	2889.3	56491.9	96955	23495.9	114522	45496.6	13180.4	0	1756.38	25089.3	5090.5	487.489	18893.9	3082.17	1982.28	8437.4	110.081	0	3573.6	115623	158807	74039.9	178969	118146	11754.7	0	1756.38	42379.3	5322.88	924.179
P08133|ANXA6_HUMAN;E5RK69|E5RK69_HUMAN;E7EMC6|E7EMC6_HUMAN;E5RFF0|E5RFF0_HUMAN	6	6	226.74	0.0983614	0.033896	1.26322	0.455448	Control	Competition	P08133	2.08201e+06	2.33423e+06	2.53152e+06	2.58784e+06	1.98165e+06	2.68866e+06	2.29744e+06	1.49589e+06	1.6132e+06	1.82113e+06	1.62644e+06	2.3917e+06	2.30202e+06	2.39814e+06	2.23746e+06	2.33208e+06	1.39191e+06	1.82542e+06	1.68614e+06	2.97144e+06	1.93128e+06	3.41191e+06	1.86059e+06	4.66235e+06	2.84157e+06	3.06167e+06	2.64234e+06	5.73871e+06	2.54171e+06	6.21081e+06	2.05302e+06	4.60709e+06	2.23746e+06	3.93921e+06	1.45545e+06	3.46062e+06
A0A087X253|A0A087X253_HUMAN;A0A087WU93|A0A087WU93_HUMAN;C9J1E7|C9J1E7_HUMAN;K7EN71|K7EN71_HUMAN	6	6	250.08	0.0991366	0.0341143	1.67265	0.453904	Competition	Control	A0A087X253	258793	450126	132557	149769	223650	158346	464333	302035	254533	362493	461968	451592	364567	68309.3	368811	169777	303389	244254	209586	573004	101127	197461	209988	274585	574305	618180	416912	1.14228e+06	721937	1.1727e+06	325133	131230	368811	286778	317239	463055
B4DUR8|B4DUR8_HUMAN;Q5SZX6|Q5SZX6_HUMAN;E9PQ35|E9PQ35_HUMAN	11	11	492.72	0.100003	0.0343631	3.55127	0.452194	Competition	Probe	B4DUR8	90317.9	40823.7	113726	45452.7	114967	1.77407e+06	296218	83954.3	290455	507317	538457	479762	103669	114646	150840	122292	74876.4	52093.9	73144.8	51968	86760.5	59926.6	107944	3.07638e+06	366373	171831	475750	1.59865e+06	841470	1.24585e+06	92455.6	220247	150840	206568	78294.5	98759.3
E5RI99|E5RI99_HUMAN;A0A0B4J213|A0A0B4J213_HUMAN	2	2	156.73	0.100389	0.0344468	2.66671	0.451434	Competition	Probe	E5RI99	121134	114085	163455	173254	98979.9	104328	189817	42236.7	531207	206006	498635	226493	205048	96918.4	122416	59784.3	101527	49694.7	98101.3	145229	124698	228425	92933.5	180914	234773	86446.5	870087	649163	779239	588162	182868	186191	122416	100984	106162	94210.9
K7ER96|K7ER96_HUMAN;K7EML9|K7EML9_HUMAN	2	2	114.84	0.101378	0.0347365	2.98124	0.449507	Competition	Control	K7ER96	2775.83	7829.28	2924.5	564.146	1954.44	95795	2743.6	27368	149256	29801.9	25490.9	98770.7	5110.34	55886.3	3889.38	5411.73	3358.6	39166.6	2248.03	9966.56	2231.07	743.792	1835.05	166116	3393.39	56014.6	244474	93911.2	39835.8	256489	4557.56	107364	3889.38	9141.17	3511.92	74251.8
F5GX14|F5GX14_HUMAN;H0YG07|H0YG07_HUMAN	2	2	98.26	0.101564	0.0347508	2.03102	0.449145	Competition	Control	F5GX14	86337.4	44140	59636.3	12720.6	9990.12	15277.5	50769.6	26669.9	61625.8	134987	58056.3	131172	45809.5	51636.4	30568.9	33411.1	68960.8	33351.5	69921.1	56189.6	45496.1	16771.3	9379.85	26492.4	62793.8	54585.6	100940	425368	90727	340629	40854.4	99199.2	30568.9	56436	72108.8	63227.5
A0A494C128|A0A494C128_HUMAN	2	2	52.45	0.102933	0.035169	3.36916	0.446511	Probe	Control	A0A494C128	4218.03	14675.5	11182.1	1816.56	37681.6	0	53001.3	73479.6	17438.5	11538.1	34505.5	10606.9	17592.9	25981	42149.2	96715	14441.4	37525.6	3416.01	18681.7	8530.74	2395.02	35379.8	0	65554	150392	28563.3	36358.7	53923.2	27544.2	15689.9	49912.3	42149.2	163365	15100.7	71140.7
H3BMQ5|H3BMQ5_HUMAN	1	1	100.16	0.104863	0.0357776	17.9982	0.442852	Competition	Control	H3BMQ5	0	4579.65	3056.96	383.294	583.157	0	41080.2	112.348	69819.2	36507.6	2401.34	4918.71	0	0	3638.57	48.8692	301.208	27314.8	0	5829.83	2332.13	505.348	547.534	0	50809.6	229.944	114360	115042	3752.68	12773	0	0	3638.57	82.5469	314.959	51783.2
A0A087WZN1|A0A087WZN1_HUMAN	1	1	100.66	0.105649	0.035995	5.05315	0.441379	Competition	Control	A0A087WZN1	17407	2536.53	12023.1	13623.8	10247.9	70957.5	106398	3259.88	187895	87826.9	157542	97797.4	89035.6	30936.8	40113.6	3833.25	29061	6995.23	14097.2	3228.97	9172.36	17962.2	9621.88	123046	131597	6672.05	307761	276759	246198	253962	79404.8	59433.1	40113.6	6474.89	30387.7	13261.5
A0A087WTT1|A0A087WTT1_HUMAN;E7EQV3|E7EQV3_HUMAN;E7ERJ7|E7ERJ7_HUMAN;H0YAR2|H0YAR2_HUMAN;Q9H361|PABP3_HUMAN;H0YAP2|H0YAP2_HUMAN;H0YB86|H0YB86_HUMAN;B1ANR0|B1ANR0_HUMAN;E5RJB9|E5RJB9_HUMAN;H0YBN4|H0YBN4_HUMAN;Q4VXU2|PAP1L_HUMAN;B1ANR1|B1ANR1_HUMAN;E5RFD8|E5RFD8_HUMAN;H0YAS6|H0YAS6_HUMAN;H0YEU6|H0YEU6_HUMAN	9	9	335.76	0.105938	0.0360423	4.13826	0.440841	Competition	Control	A0A087WTT1	91837.1	15010.5	39224.4	14320.3	69070.5	2341.58	190997	112122	329505	15134.9	285044	26464.8	111796	56013.1	113993	35914.5	38331.1	35080.4	74375.1	19108.1	29924	18880.4	64851.2	4060.49	236233	229481	539711	47692.7	445451	68724.2	99703.5	107607	113993	60664.5	40080.9	66505.1
P20930|FILA_HUMAN	2	2	77.81	0.106928	0.0363277	2.27053	0.439008	Control	Competition	P20930	75247.2	80044.4	71133.4	98415.5	97751.3	32618.9	60050.5	76810.3	43609.2	911.809	17355.7	1749.08	79091.6	24436.5	32563.1	3368.27	35278.7	42492.1	60939.6	101895	54267.1	129755	91780	56563.9	74272.8	157209	71429.5	2873.28	27122.5	4542.03	70536.5	46945.1	32563.1	5689.49	36889.2	80556.2
A0A0A0MSQ0|A0A0A0MSQ0_HUMAN;H7C4N2|H7C4N2_HUMAN;P13796|PLSL_HUMAN;Q14651|PLSI_HUMAN;U3KQI3|U3KQI3_HUMAN;Q5TBN3|Q5TBN3_HUMAN;C9JAM8|C9JAM8_HUMAN	12	12	627.85	0.108007	0.0366425	5.78096	0.437028	Competition	Control	A0A0A0MSQ0	165578	104455	160925	120195	147417	35419.3	481121	107427	930956	56838.9	1.14459e+06	1.52223e+06	405216	38499	374318	115852	313100	301899	134095	132970	122768	158470	138412	61420.1	595070	219873	1.52485e+06	179110	1.78871e+06	3.95296e+06	361385	73960.7	374318	195690	327393	572337
P51149|RAB7A_HUMAN;C9J8S3|C9J8S3_HUMAN;C9IZZ0|C9IZZ0_HUMAN;C9J4V0|C9J4V0_HUMAN;C9J592|C9J592_HUMAN;C9J4S4|C9J4S4_HUMAN;C9J7D1|C9J7D1_HUMAN	10	10	363.17	0.1088	0.0368594	1.33805	0.435587	Competition	Control	P51149	1.16199e+06	1.20481e+06	1.0283e+06	1.62298e+06	887914	2.32696e+06	1.47708e+06	1.99693e+06	1.59029e+06	1.60629e+06	2.43681e+06	1.9087e+06	1.32818e+06	1.72559e+06	1.29025e+06	1.58468e+06	1.5743e+06	2.19547e+06	941048	1.53371e+06	784486	2.1398e+06	833674	4.03513e+06	1.82691e+06	4.08715e+06	2.6048e+06	5.06172e+06	3.8081e+06	4.95656e+06	1.18451e+06	3.31505e+06	1.29025e+06	2.67674e+06	1.64617e+06	4.16216e+06
Q15286|RAB35_HUMAN;F5H157|F5H157_HUMAN	3	2	106.2	0.109365	0.0369987	2.16516	0.434565	Probe	Competition	Q15286	5.67678e+06	2.26295e+06	4.04625e+06	4.9734e+06	4.00256e+06	4.90035e+06	3.12309e+06	3.58339e+06	4.08822e+06	5.84704e+06	4.00394e+06	4.75378e+06	5.21437e+06	7.5069e+06	3.50483e+06	3.46307e+06	1.34039e+07	2.19007e+07	4.59739e+06	2.88071e+06	3.08685e+06	6.55712e+06	3.75805e+06	8.49762e+06	3.86276e+06	7.33418e+06	6.69627e+06	1.84251e+07	6.25713e+06	1.23447e+07	4.65034e+06	1.44216e+07	3.50483e+06	5.84961e+06	1.40158e+07	4.15191e+07
P28288|ABCD3_HUMAN	1	1	48.5	0.110718	0.037404	28.9705	0.432139	Competition	Control	P28288	410.77	17062.6	5134.2	0	13.4786	81.8193	12031.3	0	114466	265549	22810.9	242856	41999.4	65483.3	24188.9	4294.38	5539.39	2432.26	332.666	21720.5	3916.84	0	12.6553	141.881	14880.7	0	187489	836794	35647.6	630653	37456.5	125801	24188.9	7253.81	5792.26	4611.05
A0A087X270|A0A087X270_HUMAN	1	1	44.28	0.111559	0.0375861	18.3562	0.430646	Competition	Control	A0A087X270	0	6653.5	5179.49	0	3844.26	4517.45	96012.3	6447.93	26448.9	115255	14142.2	112393	39737.3	15637.5	0	21773.9	5142.07	0	0	8469.81	3951.39	0	3609.42	7833.63	118752	13197.1	43321.9	363189	22100.7	291863	35439	30041.3	0	36779.1	5376.81	0
P00387|NB5R3_HUMAN;B1AHF3|B1AHF3_HUMAN	9	9	534.3	0.11157	0.0375861	4.3184	0.430627	Competition	Control	P00387	509835	565443	387104	3.2198e+06	516066	3.16008e+06	5.03006e+06	2.63576e+06	2.36265e+06	495081	1.3743e+07	1.18281e+07	1.00291e+06	9.39027e+06	915239	908818	682992	3.05544e+06	412894	719801	295319	4.2451e+06	484541	5.47984e+06	6.22137e+06	5.39465e+06	3.86989e+06	1.56009e+06	2.14767e+07	3.07155e+07	894424	1.80397e+07	915239	1.53512e+06	714171	5.79248e+06
O43790|KRT86_HUMAN;A0A087X106|A0A087X106_HUMAN;A6NCN2|KR87P_HUMAN;U3KPR1|U3KPR1_HUMAN	8	1	449.46	0.111991	0.0376226	12.6169	0.429883	Probe	Competition	O43790	20747.7	29113.8	356931	69094.4	32568.8	33871.1	22085.7	26667.1	11119.4	8914.08	16246.1	30466.2	30315.8	36106.1	14172.9	33547	516219	826870	16802.7	37061.5	272300	91096.7	30579.3	58735.3	27316.5	54579.9	18213	28089.9	25388.5	79115.1	27036.6	69363.7	14172.9	56665.5	539785	1.56757e+06
P78385|KRT83_HUMAN	8	1	433.59	0.111991	0.0376226	12.6169	0.429883	Probe	Competition	P78385	11884.1	16676.1	204446	39576.6	18655.1	19401	12650.5	15274.6	6369.07	5105.89	9305.6	17450.7	17364.6	20681.2	8118.08	19215.3	295685	473622	9624.41	21228.4	155971	52179.2	17515.5	33643	15646.6	31262.8	10432.2	16089.6	14542.3	45316.3	15486.3	39730.8	8118.08	32457.4	309183	897890
Q8TCJ2|STT3B_HUMAN	2	2	54.91	0.112518	0.0377468	146.684	0.428957	Competition	Control	Q8TCJ2	214.854	15.8063	96.9499	0	112.559	0	0	310.676	3875.34	40081.1	3978.82	16319.7	0	759.964	20.5571	0	174.545	1798.52	174.002	20.1213	73.9623	0	105.683	0	0	635.866	6347.6	126303	6217.88	42379.3	0	1459.97	20.5571	0	182.513	3409.62
P19338|NUCL_HUMAN;H7BY16|H7BY16_HUMAN	5	5	225.38	0.11316	0.0379094	1.97403	0.427834	Competition	Control	P19338	131359	137390	122632	92580.4	194443	149530	342768	127058	366471	136809	464655	196604	184708	178121	227423	73716.2	320893	241078	106382	174895	93554.9	122061	182565	259297	423949	260051	600259	431110	726136	510545	164728	342190	227423	124517	335542	457034
P34810|CD68_HUMAN	1	1	83.75	0.113928	0.0381137	29.402	0.426498	Probe	Control	P34810	0	3838.78	0.745158	0	2595.56	0	0	0	16554.2	1941.9	42417.9	134.984	55453.7	61236.3	50282.5	0	17190.5	5041.36	0	4886.71	0.568476	0	2437	0	0	0	27114.8	6119.29	66288.3	350.528	49455.4	117642	50282.5	0	17975.2	9557.37
A0A087X2D0|A0A087X2D0_HUMAN	3	1	103.43	0.114536	0.0382639	2.0742	0.425447	Competition	Control	A0A087X2D0	199273	141091	369358	187145	254542	58130.1	206042	411243	567833	636778	539106	147817	136439	71897.9	200119	126953	375906	421353	161383	179607	281780	246739	238993	100802	254841	841697	930079	2.0066e+06	842485	383855	121680	138124	200119	214441	393066	798798
D6RB48|D6RB48_HUMAN	1	1	57.93	0.116263	0.0387868	28.9977	0.422493	Competition	Probe	D6RB48	4240.74	0	0	10617.1	8796.09	0	9942.15	10703	60831.1	10425.8	110931	0	4299.99	0	2694.8	0	0	0	3434.4	0	0	13998	8258.77	0	12296.8	21906	99638	32853.5	173357	0	3834.87	0	2694.8	0	0	0
Q9NZT1|CALL5_HUMAN	3	3	131.93	0.116662	0.0388663	2.37655	0.421815	Control	Probe	Q9NZT1	128509	84997.6	378684	382251	85222.8	326269	347820	68435.5	244102	93493.3	96474	122881	76714.5	57132.6	64185.3	248633	50127.5	86378	104074	108201	288895	503974	80016.8	565778	430198	140068	399827	294614	150764	319100	68416.5	109758	64185.3	419976	52415.9	163755
Q99436|PSB7_HUMAN;Q5TBG5|Q5TBG5_HUMAN	2	2	72.97	0.117321	0.0390316	4.87843	0.420703	Competition	Control	Q99436	38384.4	47686	34798.9	82116.3	13271.3	4417.71	51485.4	13853.8	60716.6	462539	65765.5	422186	27916.5	27699.9	25053.5	42553.7	27237.2	76055	31086	60703.6	26547.8	108265	12460.6	7660.68	63679.2	28354.8	99450.5	1.45754e+06	102775	1.09634e+06	24896.8	53214.6	25053.5	71879.2	28480.6	144185
Q9Y4W6|AFG32_HUMAN	2	2	43.26	0.117677	0.0390739	8.04596	0.420104	Competition	Control	Q9Y4W6	1773.92	187.517	2675.88	3406.5	998.112	2343.53	10850.6	7462.51	3214.21	25548.6	21801.1	22730	0	2681	1258.48	10732.6	9757.4	998.95	1436.62	238.706	2041.41	4491.26	937.14	4063.88	13420.4	15273.6	5264.7	80508.4	34069.6	59025.6	0	5150.5	1258.48	18128.9	10202.8	1893.8
Q9NSB4|KRT82_HUMAN	4	1	178.96	0.117773	0.0390739	Infinity	0.419944	Control	Competition	Q9NSB4	0	331409	0	0	1800.06	6727.65	0	0	0	0	0	0	0	0	0	0	8758.36	0	0	421879	0	0	1690.1	11666.3	0	0	0	0	0	0	0	0	0	0	9158.18	0
P30154|2AAB_HUMAN	4	1	343.57	0.118428	0.0392126	6.07043	0.418849	Competition	Probe	P30154	1412.22	219.969	463.801	4761.78	460.597	1266.35	741.72	709.343	17625.1	1987.27	1491.64	3885	463.347	1165.21	452.269	506.368	588.059	1180.31	1143.7	280.017	353.831	6278.1	432.46	2195.96	917.388	1451.82	28869	6262.24	2331.05	10088.6	413.228	2238.49	452.269	855.325	614.904	2237.62
P00813|ADA_HUMAN;F5GWI4|F5GWI4_HUMAN;F5GXW0|F5GXW0_HUMAN	2	2	46.35	0.118517	0.0392126	2.09741	0.4187	Competition	Control	P00813	78064.5	97123.2	62134.4	47641.8	81054.4	133062	114888	38769.8	175547	69143.6	247637	400791	174816	183540	84462.9	235649	145766	181320	63221.2	123636	47401.8	62812.7	76103	230740	142098	79350.8	287537	217884	386993	1.04078e+06	155906	352601	84462.9	398043	152421	343745
Q5T749|KPRP_HUMAN	7	7	283.28	0.123234	0.040651	1.72086	0.41099	Control	Probe	Q5T749	1.27473e+06	1.63812e+06	737398	814378	1.31361e+06	897515	1.24654e+06	301046	539279	411360	616962	780963	822728	127241	807118	150363	961797	1.01006e+06	1.03235e+06	2.08531e+06	562556	1.07371e+06	1.23336e+06	1.55636e+06	1.54177e+06	616155	883309	1.29627e+06	964153	2.02802e+06	733736	244444	807118	253985	1.0057e+06	1.91486e+06
Q9UBR2|CATZ_HUMAN	3	3	175.44	0.12346	0.040651	5.13584	0.410627	Probe	Control	Q9UBR2	13311.2	34569	17851.9	42125.7	25376.1	48703	5986.71	153441	134306	254605	46499.9	129763	297624	306056	169220	13273.4	62463.4	85762.8	10780.2	44005.9	13619	55540	23825.9	84455	7404.59	314049	219986	802305	72667.4	336971	265430	587967	169220	22420.6	65314.8	162588
M0R2N5|M0R2N5_HUMAN;M0R3C3|M0R3C3_HUMAN	4	4	196.98	0.123489	0.040651	1.86476	0.410581	Competition	Probe	M0R2N5	325820	289025	553288	402918	256139	280937	566218	178393	636959	599029	708640	531905	453458	449274	403864	41939.9	145312	233530	263868	367925	422099	531222	240493	487168	700320	365121	1.0433e+06	1.88765e+06	1.10742e+06	1.38126e+06	404409	863104	403864	70842.3	151946	442724
Q5HYB6|Q5HYB6_HUMAN;A0A087WWU8|A0A087WWU8_HUMAN;A0A2R2Y2Q3|A0A2R2Y2Q3_HUMAN;Q5VU61|Q5VU61_HUMAN;A0A0S2Z4G6|A0A0S2Z4G6_HUMAN;A0A494C034|A0A494C034_HUMAN	4	2	280.82	0.123541	0.040651	1.92646	0.410499	Competition	Control	Q5HYB6	51318.4	53220.8	58747	239194	42626.3	18325.4	119470	54365.1	148018	159122	258294	153512	277910	98538.5	49107	35773.9	80420.2	40865.8	41560.6	67749.4	44817.6	315362	40022.4	31777.7	147765	111270	242446	501422	403647	398642	247849	189303	49107	60427.1	84091.4	77473.1
H0YDD8|H0YDD8_HUMAN;P05387|RLA2_HUMAN	3	3	83.52	0.123861	0.0407008	6.04203	0.409987	Probe	Competition	H0YDD8	6.64297e+06	5.62675e+06	4.24004e+07	5.67709e+07	5.43798e+06	4.48807e+06	3.42805e+06	4.74791e+06	4.6712e+06	3.64429e+06	3.01813e+06	1.85103e+06	4.94532e+07	6.07137e+07	4.27135e+06	2.2638e+06	4.56175e+06	7.79763e+06	5.37987e+06	7.16277e+06	3.23469e+07	7.48488e+07	5.10579e+06	7.78269e+06	4.23995e+06	9.71762e+06	7.65116e+06	1.14838e+07	4.71656e+06	4.80678e+06	4.41039e+07	1.16638e+08	4.27135e+06	3.82387e+06	4.76999e+06	1.47827e+07
P29279|CCN2_HUMAN	1	1	35.91	0.124538	0.0408676	5.18593	0.408909	Competition	Control	P29279	2959.52	54459.2	3477.91	4975.44	2581.11	10246.5	105968	56329.6	155366	3851.95	65400.2	21214.7	155593	2571.47	0	9112.29	7988.67	449.654	2396.79	69325.8	2653.27	6559.8	2423.44	17768.2	131065	115291	254481	12138.2	102204	55090.7	138763	4940.07	0	15391.9	8353.36	852.451
C9JGV6|C9JGV6_HUMAN;P43487|RANG_HUMAN	1	1	23.7	0.126418	0.0414279	21.5814	0.405949	Competition	Control	C9JGV6	2863.83	1360.41	3536.95	9205.71	2736.86	0	72.2887	13174.1	28348.7	24779.1	71365.9	287495	15508.5	18617.3	10265.8	107705	4951.73	5290.28	2319.3	1731.78	2698.31	12137.1	2569.67	0	89.4095	26963.7	46433.6	78083.3	111527	746572	13831	35765.9	10265.8	181929	5177.78	10029.3
P56537|IF6_HUMAN;B7ZBH1|B7ZBH1_HUMAN;A0A0B4J1Y7|A0A0B4J1Y7_HUMAN;A0A0U1RQV5|A0A0U1RQV5_HUMAN	4	3	140.5	0.128582	0.0420797	6.90401	0.402596	Competition	Control	P56537	9577.02	1439.22	12762.8	8586.02	18856.8	2278.8	67189.8	109675	1006.14	68037.4	87261.1	36200.5	53599	21691.7	33823.8	3259.64	14211.2	4262.01	7756.03	1832.1	9736.67	11320.1	17704.9	3951.63	83102.9	224473	1648.01	214398	136367	94006	47801.4	41672.2	33823.8	5505.98	14860	8079.89
Q96RS6|NUDC1_HUMAN	1	1	47.72	0.128827	0.0421025	46.2269	0.40222	Competition	Probe	Q96RS6	0	0	1787.49	315.677	0	6433.41	31727	0	16776.9	19400.5	9823.85	0	0	0	1681.45	0	0	0	0	0	1363.66	416.2	0	11156.1	39241.1	0	27479.6	61134.6	15352.2	0	0	0	1681.45	0	0	0
H3BR35|H3BR35_HUMAN;Q8IYD1|ERF3B_HUMAN	2	2	75.09	0.129187	0.0421629	1.43315	0.401669	Control	Probe	H3BR35	323720	209854	497696	395605	345945	387425	450851	250455	369653	265570	365143	258757	243290	215031	389086	387358	116443	156136	262168	267141	379689	521581	324812	671827	557630	512611	605471	836858	570624	671946	216974	413097	389086	654301	121758	296002
P10599|THIO_HUMAN	1	1	52.91	0.129658	0.0422594	2.95546	0.400949	Competition	Control	P10599	53533.3	36929.9	34164	11085.1	22771	160708	53784.1	68228.2	58675.7	404611	51403.4	306655	37124.4	224543	29839.4	24858.8	48258.4	16483.6	43354.4	47011.2	26063.5	14615	21380	278681	66522.2	139644	96107.6	1.275e+06	80330.3	796327	33108.8	431371	29839.4	41989.9	50461.4	31249.5
P33993|MCM7_HUMAN	3	3	102.35	0.131934	0.0429429	16.3092	0.397512	Competition	Control	P33993	8.83222	1317.12	18.0639	2846.78	0	2049.77	2695.73	3349.54	69292.3	1486.75	23139.9	1814.59	49.7304	26102.7	7221.93	19396.6	0	2234.34	7.15285	1676.68	13.7808	3753.3	0	3554.47	3334.18	6855.55	113497	4685.01	36161.7	4712.17	44.3512	50146.1	7221.93	32763.6	0	4235.84
H0YKD0|H0YKD0_HUMAN;H0YLI6|H0YLI6_HUMAN;H0YL72|H0YL72_HUMAN;H0YM64|H0YM64_HUMAN;H0YMU3|H0YMU3_HUMAN	3	3	84.59	0.137344	0.0446434	3.4344	0.389575	Competition	Control	H0YKD0	27512.8	26984.3	17076.4	45186.8	21176.3	39745.1	70439.6	52344.1	72245.5	142970	103383	168847	88406.2	16250.6	54093.1	205577	51475.2	1340.15	22281.5	34350.6	13027.4	59576	19882.7	68921.3	87122.4	107134	118334	450524	161562	438464	78843.5	31219.2	54093.1	347248	53825.1	2540.66
P60201|MYPR_HUMAN;B1B1G1|B1B1G1_HUMAN	2	2	110.93	0.138525	0.0449664	2.86938	0.387885	Control	Competition	P60201	1.94129e+06	1.80653e+06	902859	1.22302e+06	870891	766182	703519	49526.6	636557	453043	517377	257538	627314	27486.6	744468	603037	631499	2.32796e+06	1.57217e+06	2.29969e+06	688784	1.61248e+06	817691	1.32862e+06	870140	101367	1.04265e+06	1.42762e+06	808528	668779	559459	52804.8	744468	1.01861e+06	660327	4.41334e+06
Q96P70|IPO9_HUMAN	1	1	17.02	0.138952	0.0450443	2.71162	0.387277	Competition	Probe	Q96P70	41361.7	192086	49811	59590.5	76746.6	73401	47826.6	164826	181471	52448	57810.7	402111	27443.4	44830.4	46778.4	9281.93	126380	79584.9	33497.1	244522	38000.4	78566.3	72058.3	127283	59153.8	337353	297240	165273	90343.3	1.04421e+06	24474.9	86124.1	46778.4	15678.5	132150	150876
P53396|ACLY_HUMAN;K7EIE7|K7EIE7_HUMAN;K7ESG8|K7ESG8_HUMAN	9	7	405.81	0.14095	0.0456307	3.07237	0.384459	Probe	Control	P53396	188949	349217	155192	138959	193095	189929	236706	343556	534110	334329	277587	344477	193581	403795	190064	2.33665e+06	262177	347712	153022	444548	118395	183209	181299	329352	292768	703161	874843	1.05353e+06	433797	894545	172642	775735	190064	3.94692e+06	274145	659189
Q5JR08|Q5JR08_HUMAN;C9JNR4|C9JNR4_HUMAN;U3KQA9|U3KQA9_HUMAN;E9PLA2|E9PLA2_HUMAN	5	5	203.04	0.141145	0.0456322	3.15312	0.384187	Competition	Control	Q5JR08	59013.6	57397.6	71953.5	63814.2	79300.9	112006	333944	170834	71032.1	57994.1	670326	94236.6	275541	85644.3	172102	119908	56951.8	117786	47792.7	73066.4	54892.8	84135	74456.6	194228	413035	349648	116347	182750	1.04755e+06	244715	245737	164532	172102	202542	59551.6	223298
P42766|RL35_HUMAN;F2Z388|F2Z388_HUMAN	3	3	135.84	0.142481	0.0459771	2.62506	0.382328	Control	Competition	P42766	1.6141e+06	1.18448e+06	1.75521e+06	1.94723e+06	1.22177e+06	1.65047e+06	554237	1.20429e+06	406325	289705	612311	503818	1.33212e+06	2.185e+06	1.0019e+06	53521.3	1.21234e+06	2.24986e+06	1.3072e+06	1.50782e+06	1.33903e+06	2.5673e+06	1.14714e+06	2.86205e+06	685501	2.46485e+06	665538	912913	956884	1.30832e+06	1.18803e+06	4.19762e+06	1.0019e+06	90404.9	1.26769e+06	4.26527e+06
Q9Y3I0|RTCB_HUMAN	1	1	57.06	0.142594	0.0459771	10.4651	0.382171	Competition	Probe	Q9Y3I0	715.494	16248.7	826.832	400.626	8613.18	32364	149949	132374	164973	16435.2	148181	0	0	40149.4	17157.9	1164.56	0	0	579.449	20684.4	630.784	528.2	8087.03	56121.8	185462	270932	270217	51790.3	231569	0	0	77131.3	17157.9	1967.1	0	0
A0A0A0MR06|A0A0A0MR06_HUMAN	1	1	124.45	0.147586	0.0474654	20.4628	0.375385	Competition	Control	A0A0A0MR06	13295.7	21696.3	16458.2	21236.5	6197.23	17624.5	204011	5690.54	412860	417468	469142	465662	7344.48	96123.7	112371	0	36482.9	45176.7	10767.7	27619.1	12555.9	27999	5818.66	30562.3	252329	11646.9	676242	1.31552e+06	733149	1.20924e+06	6550.05	184664	112371	0	38148.4	85645.7
Q10713|MPPA_HUMAN	1	1	38.41	0.147604	0.0474654	26.7374	0.375361	Competition	Control	Q10713	4770.87	43.9071	13172.8	2649.9	4845.43	4743.75	134014	3025.24	1040.89	216362	200576	253165	27001.3	0	18072.1	4526.21	3981.2	2835.94	3863.73	55.8931	10049.4	3493.73	4549.44	8226.06	165754	6191.8	1704.91	681795	313449	657424	24080.7	0	18072.1	7645.39	4162.94	5376.36
C9JTK4|C9JTK4_HUMAN;A0A087WY71|A0A087WY71_HUMAN	2	1	38.38	0.148969	0.0478216	3.13462	0.373547	Competition	Probe	C9JTK4	28671.6	23932.3	9111.69	2.79497	12442.2	0	39468.7	0	44323.6	9899.66	4481.71	2628.33	0	0	31601.5	0	556.163	0	23219.9	30465.5	6951.24	3.68499	11682.1	0	48816.4	0	72599.6	31195.6	7003.76	6825.29	0	0	31601.5	0	581.552	0
H0YCD9|H0YCD9_HUMAN	1	1	55.74	0.14911	0.0478216	Infinity	0.373361	Competition	Control	H0YCD9	0	0	0	0	0	0	0	0	38836	0	24332.4	337523	0	0	0	57536	8632.28	0	0	0	0	0	0	0	0	0	63611.2	0	38025.3	876487	0	0	0	97186.3	9026.35	0
A0A024R4M0|A0A024R4M0_HUMAN;B5MCT8|B5MCT8_HUMAN;A8MXK4|A8MXK4_HUMAN	10	10	383.51	0.149542	0.0478963	1.49247	0.372791	Control	Competition	A0A024R4M0	2.36393e+06	2.12937e+06	2.48365e+06	2.12213e+06	2.33891e+06	1.95127e+06	2.00126e+06	1.14399e+06	1.90698e+06	1.04115e+06	2.2829e+06	594963	2.23389e+06	1.57628e+06	2.92425e+06	665285	1.80001e+06	1.50842e+06	1.91445e+06	2.71066e+06	1.89476e+06	2.79789e+06	2.19603e+06	3.38367e+06	2.47523e+06	2.34141e+06	3.12354e+06	3.28084e+06	3.56759e+06	1.54501e+06	1.99225e+06	3.02821e+06	2.92425e+06	1.12376e+06	1.88218e+06	2.85966e+06
H0YBX6|H0YBX6_HUMAN	1	1	55.99	0.150434	0.0481181	5.83151	0.371619	Competition	Control	H0YBX6	3701.34	11883.8	2106.86	6195.98	0	0	2935.69	6653.56	300.959	7797.11	1021.82	120594	3010.93	47761.9	696.494	32960.9	3506.29	20194.1	2997.56	15127.9	1607.31	8169	0	0	3630.97	13618	492.954	24570.1	1596.84	313160	2685.24	91755.8	696.494	55675.5	3666.36	38283.9
P61026|RAB10_HUMAN;A0A087WWB9|A0A087WWB9_HUMAN;A0A2R8Y7G7|A0A2R8Y7G7_HUMAN	6	5	241.51	0.151285	0.0482786	1.81564	0.370508	Control	Competition	P61026	2.14128e+06	2.13724e+06	2.17331e+06	1.78488e+06	1.41626e+06	1.21606e+06	1.23197e+06	946114	1.16766e+06	647867	1.17181e+06	820910	1.74257e+06	1.52345e+06	1.74356e+06	242937	1.67105e+06	1.83831e+06	1.73413e+06	2.72068e+06	1.658e+06	2.35325e+06	1.32975e+06	2.10874e+06	1.52375e+06	1.93643e+06	1.91257e+06	2.04155e+06	1.83123e+06	2.13175e+06	1.55408e+06	2.92671e+06	1.74356e+06	410355	1.74733e+06	3.48505e+06
Q13637|RAB32_HUMAN	2	2	79.38	0.151338	0.0482786	2.25522	0.370439	Competition	Probe	Q13637	42539.9	85610.2	77520.6	74033.2	94174.5	118352	49234.7	15619.7	200322	112885	176234	125797	40745.8	3905.89	53684.4	140569	40974.7	21684.4	34451.3	108981	59139.8	97608.1	88421.7	205232	60895.3	31969.2	328117	355722	275408	326672	36338.4	7503.65	53684.4	237441	42845.2	41109.1
Q9UJZ1|STML2_HUMAN	1	1	55.84	0.155747	0.0496194	3.85765	0.364786	Competition	Control	Q9UJZ1	0	0	23215.3	1702.37	0	14315.6	15635.4	4729.14	6480.33	5613.04	6219.56	112671	7196.75	10270.1	16948.9	18736.5	0	0	0	0	17710.7	2244.47	0	24824.4	19338.4	9679.21	10614.4	17687.7	9719.58	292585	6418.3	19730	16948.9	31648.5	0	0
M0QZC5|M0QZC5_HUMAN;M0R1H6|M0R1H6_HUMAN;M0R1H5|M0R1H5_HUMAN	9	9	383.58	0.158983	0.0505835	1.90861	0.360741	Competition	Control	M0QZC5	1.08384e+06	979747	854762	983767	845557	909403	2.11287e+06	608974	2.24421e+06	1.39846e+06	2.30606e+06	2.12658e+06	2.13803e+06	1.16264e+06	1.7105e+06	387819	1.8568e+06	1.95835e+06	877761	1.2472e+06	652092	1.29703e+06	793904	1.57698e+06	2.61328e+06	1.2464e+06	3.67589e+06	4.40681e+06	3.60377e+06	5.52234e+06	1.90676e+06	2.23355e+06	1.7105e+06	655081	1.94156e+06	3.71263e+06
Q9BWD1|THIC_HUMAN	3	3	89.22	0.159312	0.0506212	1.78468	0.360335	Competition	Probe	Q9BWD1	584787	167033	414918	290482	614066	72837.1	459200	282380	410207	451552	524391	620229	581287	95526.4	348323	58265	289283	167061	473595	212631	316537	382982	576554	126306	567957	577952	671897	1.42292e+06	819489	1.61062e+06	518410	183517	348323	98417.7	302489	316714
Q13509|TBB3_HUMAN;A0A0B4J269|A0A0B4J269_HUMAN;G3V2A3|G3V2A3_HUMAN;G3V2N6|G3V2N6_HUMAN	15	3	1136.47	0.160238	0.0508483	1.44965	0.359196	Competition	Control	Q13509	819311	993309	727584	614022	987823	1.08573e+06	1.24136e+06	1.69474e+06	670266	779172	1.46711e+06	1.72581e+06	788384	524415	1.09165e+06	899346	1.08333e+06	1.02144e+06	663526	1.26447e+06	555068	809550	927480	1.88274e+06	1.53536e+06	3.46865e+06	1.09786e+06	2.45531e+06	2.29272e+06	4.4816e+06	703107	1.00746e+06	1.09165e+06	1.51912e+06	1.13279e+06	1.93645e+06
E9PKG1|E9PKG1_HUMAN;E9PIX6|E9PIX6_HUMAN;E9PNR9|E9PNR9_HUMAN;E9PQ98|E9PQ98_HUMAN;E9PMW9|E9PMW9_HUMAN;Q9NR22|ANM8_HUMAN	7	7	407.39	0.161957	0.0513258	5.09988	0.3571	Competition	Control	E9PKG1	118231	110943	84546.4	51686.7	64551.3	68243.7	435798	57064.8	525647	590052	905298	26905	206162	19700.3	238197	29651.7	189230	68819.9	95750	141229	64499.8	68145.6	60608	118340	539012	116795	860980	1.85936e+06	1.41475e+06	69867.4	183862	37846.4	238197	50085.9	197868	130468
A0A494C0X0|A0A494C0X0_HUMAN	1	1	36.03	0.16274	0.0515063	4.88924	0.356152	Competition	Probe	A0A494C0X0	88553.4	72471.4	33403.5	4071.2	50296.8	106754	214241	634709	221792	136305	298999	211034	21052.3	65000	112788	60932.3	91423	0	71715.7	92255	25483.2	5367.62	47224.4	185120	264982	1.29907e+06	363284	429521	467258	548016	18775.1	124872	112788	102923	95596.4	0
P35908|K22E_HUMAN;Q01546|K22O_HUMAN;F8VS61|F8VS61_HUMAN;H0YID6|H0YID6_HUMAN	48	37	3833.07	0.163524	0.0516582	1.43018	0.355209	Control	Competition	P35908	5.48247e+07	6.02083e+07	3.36768e+07	4.33239e+07	4.95929e+07	6.23631e+07	4.83411e+07	6.6661e+07	2.46841e+07	3.10886e+07	2.08358e+07	2.09421e+07	6.36355e+07	6.53717e+07	3.02673e+07	2.4912e+07	4.05573e+07	6.2221e+07	4.44002e+07	7.66443e+07	2.56918e+07	5.71198e+07	4.65634e+07	1.08143e+08	5.97901e+07	1.36436e+08	4.04312e+07	9.79659e+07	3.2561e+07	5.4383e+07	5.67522e+07	1.25586e+08	3.02673e+07	4.20798e+07	4.24087e+07	1.17958e+08
P40925|MDHC_HUMAN;B9A041|B9A041_HUMAN;B8ZZ51|B8ZZ51_HUMAN;C9JF79|C9JF79_HUMAN;C9JRL4|C9JRL4_HUMAN;C9JLV6|C9JLV6_HUMAN	6	5	234.59	0.16365	0.0516582	2.80507	0.355058	Competition	Control	P40925	31433.7	30105.5	23701.7	38685.8	36071.9	11955.4	89541.2	22990.4	78532.8	13611.3	120943	156725	59170.6	20758.7	23314.2	68658	31113.8	39853.1	25456.9	38323.9	18081.9	51004.7	33868.4	20731.7	110748	47054.8	128632	42891.6	189003	406987	52770.2	39879.7	23314.2	115973	32534.1	75553.2
Q8N111|CEND_HUMAN	1	1	45.76	0.168754	0.0531995	Infinity	0.349034	Competition	Control	Q8N111	0	0	0	0	0	0	0	0	0	0	0	57369.2	3752.81	0	2866	0	15176.8	0	0	0	0	0	0	0	0	0	0	0	0	148977	3346.88	0	2866	0	15869.6	0
P33947|ERD22_HUMAN;O43731|ERD23_HUMAN	2	1	95.49	0.169855	0.0532219	11.28	0.347758	Competition	Control	P33947	2665.17	2715.21	331.016	2161.31	2490.14	225.013	3489.13	6450.35	86195.1	4845.18	18055.9	394.882	4782.57	7664.33	3265.85	188.397	3702.89	4407.32	2158.41	3456.43	252.53	2849.56	2338.02	390.191	4315.49	13202	141183	15268	28216.7	1025.44	4265.25	14724	3265.85	318.229	3871.93	8355.36
P62701|RS4X_HUMAN;C9JEH7|C9JEH7_HUMAN;Q8TD47|RS4Y2_HUMAN	14	14	725.4	0.169859	0.0532219	2.32434	0.347754	Competition	Control	P62701	942154	694861	813417	830077	804999	945711	2.43964e+06	1.7014e+06	2.53379e+06	575051	3.98921e+06	455164	1.73842e+06	1.26353e+06	1.72234e+06	1.00776e+06	1.59757e+06	922994	763011	884548	620550	1.0944e+06	755825	1.63994e+06	3.01744e+06	3.48228e+06	4.15022e+06	1.81209e+06	6.23412e+06	1.18198e+06	1.55038e+06	2.42739e+06	1.72234e+06	1.70225e+06	1.6705e+06	1.74981e+06
P05091|ALDH2_HUMAN;S4R3S4|S4R3S4_HUMAN	2	2	58.38	0.169884	0.0532219	1.62608	0.347725	Probe	Competition	P05091	12373.1	0	23198.3	471.081	20068	196.227	8381.98	4989.36	11000.1	9466.48	19298	2795.86	38985.6	12570.3	19643	2841.65	8274.13	8635.14	10020.5	0	17697.8	621.09	18842.1	340.275	10367.2	10211.8	18017.6	29830.6	30157.8	7260.35	34768.6	24149	19643	4799.95	8651.85	16370.4
P29966|MARCS_HUMAN	6	6	484.06	0.170111	0.0532219	13.1713	0.347464	Competition	Control	P29966	94422.6	43457.9	21605.2	46069.8	53694.9	76006.9	449492	1975.01	1.75755e+06	365574	1.51158e+06	329590	30448.9	22592.5	59259.8	75841.7	242898	63689.8	76469	55321.3	16482.4	60740.1	50414.9	131802	555948	4042.29	2.87878e+06	1.15199e+06	2.36222e+06	855885	27155.3	43402.7	59259.8	128107	253986	120743
A0A096LP68|A0A096LP68_HUMAN	1	1	69.46	0.170206	0.0532219	1.27272	0.347354	Control	Probe	A0A096LP68	737157	517370	715490	778600	752814	758455	683468	778999	650331	746932	596958	590229	525785	517227	650041	754014	679141	220858	596993	658605	545842	1.02653e+06	706827	1.31522e+06	845339	1.59439e+06	1.06521e+06	2.35372e+06	932893	1.53272e+06	468912	993649	650041	1.27363e+06	710143	418702
H0YDU8|H0YDU8_HUMAN	1	1	72.48	0.170272	0.0532219	7.31012	0.347278	Competition	Probe	H0YDU8	0	7829.66	3503.24	17871.1	27.9173	7721.67	18543	20166.7	27311.8	2357.89	29414.8	18726.6	5374.46	3221.87	4897.33	0	1538.4	907.589	0	9967.05	2672.59	23561.9	26.2119	13390	22934.6	41275.6	44735.3	7430.15	45967.8	48629.5	4793.12	6189.56	4897.33	0	1608.63	1720.6
A0A1W2PPX5|A0A1W2PPX5_HUMAN;A0A1W2PPU6|A0A1W2PPU6_HUMAN	5	5	264.38	0.170373	0.0532219	3.3084	0.347162	Competition	Control	A0A1W2PPX5	589813	407527	427327	236376	429946	163792	436372	168736	1.91025e+06	3.1489e+06	866717	928725	1.50501e+06	1.4522e+06	1.44595e+06	103371	1.19293e+06	957781	477665	518776	326005	311647	403682	284028	539722	345356	3.12889e+06	9.92277e+06	1.35446e+06	2.41173e+06	1.34221e+06	2.78984e+06	1.44595e+06	174608	1.24739e+06	1.81575e+06
Q96FQ6|S10AG_HUMAN	2	2	63.78	0.170844	0.0532997	2.50256	0.346621	Competition	Control	Q96FQ6	5639.14	25628.6	64.3798	16039.5	4625.48	6472.76	7827.08	13516.2	61463.6	3099.25	44304.4	16113.5	19867.2	30422.4	17502.4	4747.99	37801.4	22928.9	4566.9	32624.8	49.1148	21147	4342.93	11224.3	9680.84	27663.7	100674	9766.3	69236.4	41843.9	17718.2	58444.7	17502.4	8020.01	39527	43468.4
O00151|PDLI1_HUMAN	3	3	102.71	0.172745	0.053823	2.50961	0.344455	Competition	Control	O00151	192764	192389	229784	174819	195475	421176	357050	549014	377351	1.6677e+06	366696	211722	190616	978626	278921	811814	244985	145824	156112	244909	175300	230488	183534	730354	441613	1.12368e+06	618080	5.25524e+06	573052	549803	169997	1.88005e+06	278921	1.37127e+06	256169	276453
A0A286YFL6|A0A286YFL6_HUMAN	2	1	90.94	0.174189	0.0542026	10.5849	0.342826	Probe	Competition	A0A286YFL6	31.2939	3980.05	43.5108	5.27284	57.8907	3401.72	1488.12	9.69097	1812.66	1353.03	31.1938	1.34057	14467.2	179.363	31594.9	1638.06	116.832	1710.54	25.3437	5066.54	33.194	6.9519	54.3543	5898.87	1840.56	19.8347	2969.03	4263.63	48.7479	3.48123	12902.3	344.576	31594.9	2766.91	122.166	3242.83
Q08554|DSC1_HUMAN	2	2	135.92	0.174959	0.0543421	2.67617	0.341963	Control	Competition	Q08554	270875	343433	301337	97286.5	422086	437078	247674	153757	87890	89472.8	52024.9	68725.4	161318	865717	183748	35990.6	161887	8835.5	219371	437185	229887	128266	396302	757930	306333	314697	143959	281945	81301.6	178467	143869	1.66314e+06	183748	60793.1	169277	16750.3
P16152|CBR1_HUMAN;A8MTM1|A8MTM1_HUMAN	2	2	99.07	0.175089	0.0543421	3.77799	0.341817	Competition	Probe	P16152	4793.36	7304.95	9439.02	10208	6159.79	41965	9154.6	5956.96	148448	66736.4	15219.3	27855.7	1975.05	29173.9	6160.01	13244.1	14439.2	7366.37	3881.94	9299.1	7200.95	13458.6	5783.51	72770.8	11322.8	12192.2	243149	210298	23783.8	72336.2	1761.41	56046.3	6160.01	22371.2	15098.3	13965.1
P08648|ITA5_HUMAN	3	3	150.5	0.175479	0.0543628	3.50243	0.341382	Competition	Probe	P08648	75264.6	219093	21286.2	101577	74627.4	6933.2	172399	47593	434568	27063	327042	407002	131257	78500	89013	36073.8	34666.7	34685.6	60953.7	278903	16239.1	133923	70068.6	12022.7	213230	97409.4	711798	85280.3	511082	1.05691e+06	117059	150807	89013	60933.6	36249.3	65756.8
Q5T7C4|Q5T7C4_HUMAN;B2RPK0|HGB1A_HUMAN;D6R9A6|D6R9A6_HUMAN	6	6	263.33	0.175608	0.0543628	2.51582	0.341239	Probe	Control	Q5T7C4	78757.5	81848.9	96919.1	76679.3	106332	80776.3	192653	440674	229117	112142	262111	32598.3	155951	139488	191826	580325	60063.6	183875	63782.5	104192	73938.8	101097	99836.6	140073	238281	901936	375281	353381	409612	84651.8	139082	267973	191826	980250	62805.5	348589
H7BY10|H7BY10_HUMAN	1	1	41.72	0.176343	0.0544956	2.73788	0.340422	Probe	Control	H7BY10	29975	3347.13	32313	31552	47005.5	0	50322	45815.1	53553.5	20226.6	76389.5	12327.4	50798	37594.7	60408.1	134974	58670.9	52335.8	24275.5	4260.85	24651.3	41599.3	44134.1	0	62240.2	93770.6	87717.7	63737.6	119377	32011.9	45303.3	72223.5	60408.1	227991	61349.2	99217.8
C9JY26|C9JY26_HUMAN	2	2	97.19	0.176508	0.0544956	2.06363	0.34024	Competition	Probe	C9JY26	14424	23382.9	14224.4	13261.4	47520.5	65215.8	7941.43	13014.6	51615.2	48433.7	48592.2	20435.2	29718	3625.96	6232.41	30006.1	16837.6	5666.52	11681.4	29766.1	10851.7	17484.3	44617.6	113090	9822.26	26637.1	84542.9	152624	75937.1	53066.6	26503.4	6965.87	6232.41	50684.4	17606.2	10742.6
M0R117|M0R117_HUMAN;M0R0P7|M0R0P7_HUMAN	5	5	213.81	0.176716	0.0544956	1.3333	0.340009	Competition	Control	M0R117	1.84437e+06	1.52018e+06	2.18921e+06	1.77528e+06	2.32701e+06	1.28287e+06	2.02523e+06	2.92832e+06	2.42571e+06	1.95134e+06	3.62404e+06	1.63022e+06	2.97342e+06	2.29409e+06	2.96885e+06	1.35062e+06	2.61663e+06	2.22598e+06	1.49368e+06	1.93517e+06	1.67013e+06	2.34059e+06	2.18486e+06	2.22459e+06	2.50489e+06	5.99343e+06	3.97318e+06	6.14903e+06	5.66345e+06	4.23338e+06	2.65179e+06	4.4072e+06	2.96885e+06	2.28138e+06	2.73608e+06	4.21999e+06
P43686|PRS6B_HUMAN	1	1	61.09	0.177619	0.0547038	6.41271	0.339013	Competition	Probe	P43686	0	2531.23	0	0	0	27013.5	0	3527.18	3889.41	26579.8	15246.6	32243.1	0	9630.13	0	178.195	733.205	2165.43	0	3222.22	0	0	0	46843.7	0	7219.14	6370.63	83757.9	23826.6	83729.5	0	18500.5	0	300.995	766.676	4105.21
O95573|ACSL3_HUMAN;F5H062|F5H062_HUMAN	3	2	166.94	0.178254	0.0547765	4.30266	0.338315	Competition	Control	O95573	91859.5	70613.7	36221.9	49320.7	62358.1	72003.1	67567.4	23508.4	278520	991704	177861	106076	50503.8	35509.5	70011.2	125971	104143	62126.3	74393.2	89890.3	27633.4	65026.2	58548.9	124859	83570	48114.9	456201	3.12504e+06	277951	275461	45040.9	68217.7	70011.2	212782	108897	117779
A2A274|A2A274_HUMAN	5	5	216.02	0.17831	0.0547765	2.41395	0.338254	Competition	Control	A2A274	198665	69498.8	397314	120274	89420.7	533737	213209	146985	447501	983457	417692	1.1922e+06	231300	1.15215e+06	149114	123718	154809	134009	160890	88470.9	303108	158573	83958.3	925545	263705	300836	732982	3.09905e+06	652746	3.09592e+06	206281	2.2134e+06	149114	208978	161876	254054
A0A0B4J1Z1|A0A0B4J1Z1_HUMAN;F8WEA1|F8WEA1_HUMAN	2	1	51.58	0.179076	0.0549416	2.91597	0.337416	Competition	Control	A0A0B4J1Z1	57720.6	43422.2	47220	68798.7	81827.1	5327.51	86910.4	124785	220076	239696	189080	26828.9	59933.8	26907.4	64520.2	5899.45	125383	191942	46745.6	55275.8	36023.8	90706.7	76828.6	9238.34	107494	255399	360472	755324	295484	69669.9	53450.9	51692	64520.2	9965	131106	363882
Q09666|AHNK_HUMAN;E9PJC6|E9PJC6_HUMAN	3	3	90.52	0.180513	0.0552323	3.02828	0.335856	Competition	Control	Q09666	3150.38	14035.3	1344.73	7039.55	7608.93	24507.1	25469.3	6358.35	28878.9	24659.7	73216.1	16107.1	25344	604.086	16620.8	2395.75	7310.9	44389.6	2551.36	17866.7	1025.88	9281.2	7144.12	42497.4	31501.4	13013.7	47302.1	77707.2	114418	41827.3	22602.6	1160.52	16620.8	4046.76	7644.65	84153.5
Q7Z794|K2C1B_HUMAN	8	3	441.12	0.180832	0.0552323	4.76462	0.335511	Probe	Competition	Q7Z794	87011.2	83124.5	46897.6	90413.1	101372	109372	68448.5	178169	31616.9	70696.7	23225.7	36953.2	157681	1.44082e+06	42016.2	71174.8	68700.3	168865	70466.8	105816	35777.8	119204	95179.4	189660	84659.7	364661	51786.8	222778	36295.8	95960.9	140625	2.76797e+06	42016.2	120224	71836.5	320133
P48960|CD97_HUMAN	1	1	126	0.180853	0.0552323	16.8059	0.335489	Competition	Control	P48960	0	12796.8	0	0	0	0	0	67871.6	58884.6	0	84777	3528.66	93376.3	0	0	0	1826.14	0	0	16290.2	0	0	0	0	0	138914	96449.8	0	132485	9163.29	83276	0	0	0	1909.51	0
F8WAE5|F8WAE5_HUMAN	1	1	36.37	0.180942	0.0552323	2.90689	0.335393	Competition	Probe	F8WAE5	24362.6	64317.9	17128.5	2479.7	40518.3	5177.39	36260.7	28629	4677.42	58844.1	134136	120523	1189.72	13516.3	2562.48	16722.7	10215.2	87573.5	19730.2	81875.8	13067.2	3269.32	38043.2	8978.02	44848.7	58595.5	7661.36	185428	209620	312975	1061.03	25966.2	2562.48	28247	10681.5	166021
Q02878|RL6_HUMAN;F8VZ45|F8VZ45_HUMAN;F8VR69|F8VR69_HUMAN;F8VU16|F8VU16_HUMAN	14	13	744.02	0.181216	0.0552457	1.34519	0.335098	Control	Competition	Q02878	3.02449e+06	2.75403e+06	3.57742e+06	3.6456e+06	2.99704e+06	2.67022e+06	2.50232e+06	1.57495e+06	2.38868e+06	2.09104e+06	2.94009e+06	2.38106e+06	3.23006e+06	2.15236e+06	3.45772e+06	1.30922e+06	3.36185e+06	3.62603e+06	2.44941e+06	3.50584e+06	2.72919e+06	4.80649e+06	2.81396e+06	4.63039e+06	3.09497e+06	3.22348e+06	3.91252e+06	6.58925e+06	4.59461e+06	6.18318e+06	2.88067e+06	4.13491e+06	3.45772e+06	2.21146e+06	3.51532e+06	6.8742e+06
Q8TB61|S35B2_HUMAN	2	2	111.03	0.181907	0.0553862	2.67402	0.334355	Competition	Control	Q8TB61	33011.5	24240.7	33050.8	56379.2	29534.7	110308	94300	10880	156165	164382	177502	162945	80828.7	31407.2	110837	20676.9	60704.8	32833.5	26734.7	30858.1	25214.2	74332.4	27730.5	191284	116634	22268.3	255790	517996	277390	423139	72085.7	60336.6	110837	34926.1	63476	62245.6
P15880|RS2_HUMAN;E9PQD7|E9PQD7_HUMAN;H0YEN5|H0YEN5_HUMAN;E9PMM9|E9PMM9_HUMAN;E9PPT0|E9PPT0_HUMAN;I3L404|I3L404_HUMAN;E9PM36|E9PM36_HUMAN;H3BNG3|H3BNG3_HUMAN;H0YE27|H0YE27_HUMAN	12	12	554.16	0.183479	0.0557941	3.00681	0.332677	Competition	Control	P15880	1.30275e+06	579477	1.21455e+06	842044	1.00786e+06	461953	3.67992e+06	353883	4.75601e+06	1.26306e+06	5.10463e+06	1.10522e+06	2.59299e+06	828567	2.24346e+06	826320	1.08907e+06	1.15562e+06	1.05505e+06	737666	926574	1.11018e+06	946292	801064	4.55147e+06	724298	7.79009e+06	3.98013e+06	7.97723e+06	2.87006e+06	2.31251e+06	1.59177e+06	2.24346e+06	1.39577e+06	1.13878e+06	2.19082e+06
Q8NFQ8|TOIP2_HUMAN	2	1	68.9	0.184259	0.0559607	2.48741	0.33185	Competition	Control	Q8NFQ8	8315.06	15802.3	8218.04	9225.72	13627.4	22182.6	13316	14797.1	16456.4	98459.5	18396.7	31028.1	14062	6888.46	6748.85	4386.27	29506.6	36098	6734.03	20116.1	6269.48	12163.5	12795	38466.5	16469.8	30285.4	26954.7	310264	28749.3	80574.2	12541	13233.5	6748.85	7409.03	30853.6	68434.3
C9JLV4|C9JLV4_HUMAN	1	1	39.14	0.187185	0.0567492	2.55249	0.32878	Competition	Probe	C9JLV4	475639	1.07864e+06	769398	1.51155e+06	630078	579720	1.38821e+06	98235.5	2.09205e+06	1.75966e+06	2.07906e+06	1.87754e+06	1.2393e+06	66479.3	852900	917865	551485	13426.7	385200	1.37309e+06	586968	1.99288e+06	591589	1.00528e+06	1.71699e+06	201060	3.42666e+06	5.54502e+06	3.24904e+06	4.87564e+06	1.10525e+06	127714	852900	1.5504e+06	576660	25454.3
Q9Y6C9|MTCH2_HUMAN;E9PIE4|E9PIE4_HUMAN	6	5	213.87	0.187429	0.0567492	5.54647	0.328527	Competition	Control	Q9Y6C9	15243.3	38143.6	29886.1	59868.2	23935.6	32067.3	24319.2	8776.84	172361	228868	399166	271056	34147.2	118257	45558.8	38120.8	18149.2	183690	12344.9	48556.3	22799.9	78932.4	22473.4	55607.4	30078.9	17963.7	282318	721206	623793	703882	30453.6	227184	45558.8	64391.4	18977.7	348239
P11498|PYC_HUMAN;E9PS68|E9PS68_HUMAN;A0A494C016|A0A494C016_HUMAN;A0A494C0T2|A0A494C0T2_HUMAN	24	24	1194.36	0.187563	0.0567492	1.60495	0.328387	Control	Competition	P11498	4.30807e+06	2.29807e+06	5.3349e+06	3.97036e+06	3.4565e+06	1.75032e+06	2.43329e+06	2.52192e+06	1.91823e+06	2.02038e+06	2.4666e+06	1.79776e+06	2.37749e+06	2.34991e+06	4.50469e+06	1.2644e+06	3.23805e+06	4.18009e+06	3.48893e+06	2.92541e+06	4.06996e+06	5.23467e+06	3.24535e+06	3.0352e+06	3.00959e+06	5.16165e+06	3.14195e+06	6.36657e+06	3.85467e+06	4.66845e+06	2.12032e+06	4.51443e+06	4.50469e+06	2.13575e+06	3.38587e+06	7.92458e+06
Q8NBJ5|GT251_HUMAN;M0QX72|M0QX72_HUMAN	3	2	114.98	0.191227	0.057785	1.98963	0.324625	Competition	Control	Q8NBJ5	393048	327860	373547	431264	379093	4.32726e+06	1.01169e+06	650740	1.12263e+06	4.2125e+06	1.29324e+06	4.10874e+06	880557	8.20326e+06	680500	518277	774714	757020	318313	417361	284976	568595	355936	7.50383e+06	1.25129e+06	1.33188e+06	1.83881e+06	1.32744e+07	2.021e+06	1.06697e+07	785309	1.57594e+07	680500	875442	810079	1.43515e+06
Q8N1N4|K2C78_HUMAN;H0YIC5|H0YIC5_HUMAN	6	4	401.74	0.193013	0.0582516	3.26358	0.322818	Control	Competition	Q8N1N4	45999.3	93931.1	9181.18	38594.2	73763.3	38992.7	31842.8	21657.3	14230.4	0	17903.2	6431.3	42179.9	18797.1	28279.8	16304.7	10424.5	58695	37252.9	119573	7004.25	50884	69257.3	67616.5	39384.4	44326.3	23308.6	0	27978.1	16700.9	37617.4	36111.3	28279.8	27541	10900.4	111274
H0YDD4|H0YDD4_HUMAN	1	1	44.4	0.196402	0.0592	63.5994	0.31944	Competition	Control	H0YDD4	0	0	0	18.8564	2309.97	13.876	92.2409	3193.96	0	140378	266.168	5064.19	0	22825.2	3300.85	1358.44	118.846	0	0	0	0	24.8609	2168.86	24.0621	114.087	6537.12	0	442357	415.952	13150.8	0	43849.8	3300.85	2294.6	124.272	0
P11387|TOP1_HUMAN;E5RIC7|E5RIC7_HUMAN	2	2	88.07	0.197735	0.0595272	89.7562	0.318128	Competition	Control	P11387	606.589	0	0	0	0	0	0	0	5941.39	42011.9	0	6491.81	0	0	0	0	833.809	0	491.251	0	0	0	0	0	0	0	9731.67	132387	0	16858.1	0	0	0	0	871.872	0
A0A2R8Y5V9|A0A2R8Y5V9_HUMAN;A0A2R8YGX3|A0A2R8YGX3_HUMAN	3	1	201.66	0.1983	0.0596229	1.89564	0.317574	Competition	Probe	A0A2R8Y5V9	28490.7	33171.3	36845.2	141580	28808.6	8863.44	82408.5	22874	102007	52604.7	123714	54100	58727.1	29305.3	35493	23969.1	51492.4	31915.7	23073.4	42226.7	28108.9	186664	27048.8	15369.9	101926	46816.7	167082	165767	193334	140488	52374.7	56298.7	35493	40487.1	53843	60505.6
Q8WXG1|RSAD2_HUMAN	1	1	67.88	0.198825	0.0597058	10.6305	0.317063	Competition	Control	Q8WXG1	20992.3	8762.99	8827.67	31198.3	35694.3	19835.1	135255	31528.3	551029	384343	120400	109565	101272	53573	46482	0	38660.8	37313	17000.8	11155.2	6734.56	41133	33513.8	34395.7	167289	64529.6	902556	1.21113e+06	188155	284521	90317.9	102920	46482	0	40425.7	70737.7
O15270|SPTC2_HUMAN	2	2	59.28	0.202304	0.0606748	40.8092	0.313704	Competition	Control	O15270	0	2290.66	5316.92	0	0	0	1967.42	0	9524.82	44896.8	254070	0	11008.8	0	20083	2339.48	6099.26	1878.41	0	2915.98	4056.24	0	0	0	2433.38	0	15601.1	141478	397047	0	9817.98	0	20083	3951.7	6377.69	3561.08
Q96GC9|VMP1_HUMAN;K7EK01|K7EK01_HUMAN;K7EL46|K7EL46_HUMAN;K7EPE7|K7EPE7_HUMAN	4	4	160.22	0.203039	0.0608195	12.4644	0.313003	Competition	Control	Q96GC9	13927.8	7967.5	15967.6	10948.6	8298.53	3629.67	90401.7	9542.46	337517	2985.43	306972	9663.15	31338.1	14084.2	40271.4	5164.84	24716.7	5929.33	11279.5	10142.5	12181.5	14435	7791.6	6294.15	111812	19530.7	552835	9407.65	479719	25093.4	27948.3	27057.3	40271.4	8724.13	25845	11240.8
K7EPV0|K7EPV0_HUMAN	2	2	44.64	0.20331	0.0608249	1.75583	0.312745	Competition	Control	K7EPV0	54754.5	120727	75101.7	115137	67269	51243.8	95002.1	138604	133179	120533	229866	133049	24331.8	5144.6	75179.7	209267	87017.3	165243	44343.5	153684	57294.5	151801	63159.7	88861.1	117502	283682	218139	379822	359222	345504	21699.9	9883.33	75179.7	353481	90989.7	313267
A0A087X1I3|A0A087X1I3_HUMAN;A0A494C1T6|A0A494C1T6_HUMAN;H0Y8X1|H0Y8X1_HUMAN	3	3	88.44	0.204154	0.0610014	2.01396	0.311944	Competition	Probe	A0A087X1I3	140044	124628	117042	64410.2	133927	126417	318945	51353.8	184703	113030	403295	147724	168384	56679	172785	64595.2	127343	15511.9	113416	158650	89290.5	84920.8	125746	219217	394483	105107	302533	356177	630246	383612	150171	108887	172785	109110	133157	29407.4
B8ZZZ7|B8ZZZ7_HUMAN;C9JGM8|C9JGM8_HUMAN	2	2	62.26	0.206258	0.0615539	2.85692	0.309962	Competition	Control	B8ZZZ7	16485.4	8395.55	4576.62	252.897	3770.59	6654.09	6557.94	3576.58	6983.24	56917.6	23500.6	17127.1	7503.4	0	0	17284.5	25308.4	6574.78	13350.9	10687.4	3491.47	333.429	3540.25	11538.7	8111.12	7320.24	11438.2	179358	36725.4	44476	6691.78	0	0	29195.9	26463.7	12464.4
K7EJE8|K7EJE8_HUMAN;K7ER27|K7ER27_HUMAN	2	2	87.69	0.210629	0.0627803	2.93256	0.305917	Control	Competition	K7EJE8	1.06264e+06	7.27142e+06	526724	1.93331e+06	1.37487e+06	4.2498e+06	742427	2.01611e+06	405389	679005	522342	1.23351e+06	288888	1.71705e+06	1.20451e+06	3.23165e+06	2.0535e+06	4.25862e+06	860588	9.25641e+06	401834	2.54895e+06	1.29088e+06	7.3695e+06	918262	4.1264e+06	664005	2.13967e+06	816287	3.20321e+06	257640	3.29864e+06	1.20451e+06	5.45871e+06	2.14724e+06	8.07347e+06
C9J0E4|C9J0E4_HUMAN;P01040|CYTA_HUMAN	2	2	71.53	0.211028	0.0628214	2.89032	0.305552	Probe	Competition	C9J0E4	177397	148695	99840.3	113094	115288	30090.9	79331.1	142910	44891.9	32760.6	60783.2	41232.2	68860.9	153049	80377.3	705750	88776	64833.2	143667	189286	76167.4	149107	108245	52180	98119.8	292497	73530.5	103235	94988.5	107073	61412.3	294025	80377.3	1.19211e+06	92828.6	122910
Q9UMS4|PRP19_HUMAN;F5GY56|F5GY56_HUMAN;H0YGF3|H0YGF3_HUMAN	3	3	86.67	0.216979	0.0645132	1.75498	0.3002	Competition	Probe	Q9UMS4	65548.7	85019.8	79200.3	150660	94794.2	255426	160202	58963	220664	181971	179886	406718	122521	67003.8	129502	274839	39027.2	55664.6	53085.2	108229	60421.3	198636	89003.5	442930	198144	120680	361435	573424	281116	1.05617e+06	109268	128722	129502	464242	40808.8	105529
Q5JWF2|GNAS1_HUMAN;A0A0A0MR13|A0A0A0MR13_HUMAN	3	2	137.94	0.217466	0.0645781	7.09364	0.29977	Competition	Control	Q5JWF2	26568.9	22554	29619.6	16182.4	29562.7	878.216	166866	26694.8	240770	3103.23	291677	160189	66609.3	1962.4	134812	32740	84231.3	22464.6	21517.1	28710.9	22596.6	21335.4	27756.8	1522.9	206387	54636.6	394368	9778.83	455816	415981	59404.3	3769.98	134812	55302.4	88076.4	42588.2
A0A0G2JM12|A0A0G2JM12_HUMAN	1	1	40.57	0.2178	0.0645976	11.0711	0.299475	Competition	Probe	A0A0G2JM12	3042.23	4443.55	5130.6	0	3587.69	9737.18	9760.08	2743.63	44887.6	180305	4861.95	3333.52	24.0637	0	8448.88	2163.08	3030.52	8543.76	2463.77	5656.57	3914.09	0	3368.53	16885.1	12071.6	5615.44	73523.5	568173	7597.97	8656.55	21.4608	0	8448.88	3653.74	3168.86	16197.2
Q8NBN3|TM87A_HUMAN;H3BTS6|H3BTS6_HUMAN	2	2	49.88	0.219334	0.0649725	18.859	0.298127	Probe	Control	Q8NBN3	4549.74	894.455	0	1433.42	0	2105.31	832.19	1935.99	2938.06	14637.6	7023.19	4527.13	8227.89	79913.2	40693.4	1175	0.17131	39399.4	3684.65	1138.63	0	1889.87	0	3650.77	1029.28	3962.43	4812.39	46125.8	10975.4	11756.1	7337.9	153522	40693.4	1984.75	0.179131	74693.2
P27695|APEX1_HUMAN;G3V3M6|G3V3M6_HUMAN;A0A0C4DGK8|A0A0C4DGK8_HUMAN;G3V5D9|G3V5D9_HUMAN	4	4	125.94	0.219739	0.0650122	1.4943	0.297773	Competition	Control	P27695	47067.9	25883.4	35880.8	78789	50916.5	48396.8	68934.9	140572	62006.9	70357.9	48091.2	38804.4	56222.1	57355.4	68242.9	39115.1	37923.7	53661.2	38118.4	32949.2	27373.2	103878	47806.2	83924	85261.3	287711	101564	221711	75154.2	100768	50140.7	110186	68242.9	66070.9	39654.9	101731
Q9HD20|AT131_HUMAN	3	2	119.02	0.220513	0.065161	8.98372	0.297099	Competition	Control	Q9HD20	13767	6123.19	0	5644.48	3866.22	14250.3	2633.62	202957	33463.9	15734.1	38571	98790.5	2318.44	0	5274.68	19191.1	3037.71	21595.7	11149.4	7794.73	0	7441.89	3630.05	24711.2	3257.37	415396	54812.1	49581	60276.6	256541	2067.66	0	5274.68	32416.4	3176.39	40941
O75947|ATP5H_HUMAN;F5H608|F5H608_HUMAN	3	2	74.34	0.223224	0.0658812	130.872	0.294756	Probe	Control	O75947	1.06974	0	27.9597	0	0	2183.66	1114.82	0	13261.2	0	6873.11	41602.6	1277.07	0	153.388	287995	143.037	12.1967	0.86634	0	21.3302	0	0	3786.65	1378.85	0	21721.2	0	10740.9	108034	1138.93	0	153.388	486464	149.566	23.1225
O60684|IMA7_HUMAN;O15131|IMA6_HUMAN;P52294|IMA5_HUMAN;Q5TFJ7|Q5TFJ7_HUMAN;C9JYI4|C9JYI4_HUMAN;S4R3E5|S4R3E5_HUMAN	5	4	160.03	0.225472	0.0664632	1.30067	0.292837	Control	Competition	O60684	1.06932e+06	1.19786e+06	1.19614e+06	1.45995e+06	1.41156e+06	1.5591e+06	1.33623e+06	684712	902707	1.09041e+06	786737	1.26831e+06	1.20408e+06	2.41513e+06	1.08699e+06	1.25791e+06	748130	1.09543e+06	866002	1.52486e+06	912524	1.92485e+06	1.32533e+06	2.7036e+06	1.6527e+06	1.40141e+06	1.47858e+06	3.4361e+06	1.22947e+06	3.29356e+06	1.07384e+06	4.63973e+06	1.08699e+06	2.12479e+06	782282	2.07671e+06
E9PLE4|E9PLE4_HUMAN	1	1	81.42	0.226099	0.0665665	112.773	0.292306	Competition	Control	E9PLE4	8246.97	0	0	0	0	0	131151	0	274180	0	524706	0	0	0	23025.2	0	0	0	6678.88	0	0	0	0	0	162212	0	449092	0	819980	0	0	0	23025.2	0	0	0
A0A024R571|A0A024R571_HUMAN	1	1	73	0.229521	0.0674913	4.77447	0.289435	Competition	Control	A0A024R571	7631.85	5141.42	28747.4	1475.7	3129.18	0	10431.5	25351.4	42927.5	78958.6	39917.8	22638.2	25734.8	0	4022.39	47453.4	2887.95	10379.7	6180.72	6544.95	21931.2	1945.61	2938.03	0	12902.1	51887.2	70312.8	248813	62381.3	58787.3	22951.1	0	4022.39	80155.4	3019.78	19677.7
Q9Y277|VDAC3_HUMAN;E5RFP6|E5RFP6_HUMAN;E5RHE1|E5RHE1_HUMAN;E5RK27|E5RK27_HUMAN;E5RFL1|E5RFL1_HUMAN	7	6	277.52	0.232344	0.0682381	2.40754	0.287101	Competition	Control	Q9Y277	185192	191440	46057.5	165410	155400	141110	149160	88717.7	259143	205073	531233	896407	260304	317265	173949	73613.1	236997	221593	149980	243700	35136.9	218083	145907	244696	184487	181580	424462	646223	830180	2.32781e+06	232147	609501	173949	124343	247816	420095
Q7Z2W4|ZCCHV_HUMAN	2	2	103.47	0.233904	0.0686125	2.28831	0.285826	Competition	Control	Q7Z2W4	4394	554.443	38842.4	2865.23	5382.14	12525.5	34667.3	40067.7	37183.6	23783.9	5569.19	6469.61	6479.46	39268.1	14636.8	28908.3	1154.21	2035.66	3558.52	705.798	29632.5	3777.62	5053.36	21720.2	42877.8	82007.3	60904.7	74947.4	8703.22	16800.4	5778.59	75438.3	14636.8	48830.2	1206.9	3859.19
P13010|XRCC5_HUMAN;C9JZ81|C9JZ81_HUMAN;H7C0H9|H7C0H9_HUMAN	9	9	475.66	0.234821	0.0687976	1.72471	0.28508	Competition	Control	P13010	205135	113115	221260	111550	247439	95203.7	406169	142536	175762	252057	497340	239985	277132	71041.8	380320	215407	187230	77224	166130	143994	168797	147072	232323	165091	502366	291730	287888	794278	777215	623197	247155	136479	380320	363852	195777	146401
Q14525|KT33B_HUMAN;O76011|KRT34_HUMAN	6	1	395.72	0.236992	0.0693491	5.80351	0.283328	Probe	Control	Q14525	33379.1	24401.2	74250.6	58350.3	11507.9	34429.3	10355.2	486459	21649.2	29068.7	31972.8	33601.5	11876.2	56581.1	32934.2	308433	485686	475966	27032.3	31062.4	56645.2	76931.1	10804.9	59703.2	12807.8	995645	35460.2	91600.9	49965.3	87256.9	10591.6	108698	32934.2	520986	507857	902333
Q99595|TI17A_HUMAN	3	3	167.87	0.239043	0.0698642	6.80111	0.28169	Competition	Control	Q99595	42500.4	35081.5	42782.5	18242.5	55464	21160.3	198343	16680.9	669450	20213.5	516932	42192.3	119258	55891.4	109314	19083.5	58974.5	19179.6	34419.3	44658.2	32638.5	24051.6	52075.8	36693.7	245318	34141	1.09652e+06	63696.3	807833	109566	106358	107373	109314	32234.7	61666.7	36360.6
B4DJ81|B4DJ81_HUMAN	1	1	33.3	0.241177	0.0703394	19.171	0.280001	Competition	Control	B4DJ81	5405.05	5.26001	2710.24	3621.82	1032.21	9424.94	8871.76	17180.3	331588	14457.1	21900.5	31589.4	4018.87	112340	8673.92	144504	0	4003.86	4377.33	6.69592	2067.62	4775.14	969.16	16343.6	10972.9	35163.2	543123	45557	34224.9	82031.9	3584.16	215817	8673.92	244087	0	7590.5
P55263|ADK_HUMAN	2	2	63.91	0.241253	0.0703394	1.83017	0.279941	Control	Competition	P55263	164842	1.21165e+06	367227	127713	150949	583844	115672	841083	87392.2	102387	170326	107169	156072	199846	475389	470691	252364	737536	133499	1.54241e+06	280154	168382	141728	1.01243e+06	143067	1.72146e+06	143144	322642	266176	278299	139190	383925	475389	795063	263884	1.39822e+06
P54136|SYRC_HUMAN;E5RJM9|E5RJM9_HUMAN;E5RH09|E5RH09_HUMAN	5	5	240.06	0.24441	0.0711735	2.98199	0.277475	Competition	Control	P54136	141721	390855	152399	2722.81	240178	110397	34995.1	559923	619062	695852	771022	415261	204889	162838	192801	11184.3	401498	184391	114774	497553	116264	3589.86	225506	191438	43283.3	1.146e+06	1.01399e+06	2.19276e+06	1.20491e+06	1.07836e+06	182727	312830	192801	18891.8	419826	349568
F5GYJ8|F5GYJ8_HUMAN;J3KR44|J3KR44_HUMAN;F5H6Q1|F5H6Q1_HUMAN	2	2	98.19	0.247202	0.0718995	5.65673	0.275324	Competition	Control	F5GYJ8	94751.9	28018.9	58776.9	98631.5	39354.1	204.844	318269	10924.9	431443	23916.5	844314	179804	141556	72680.3	88564.8	15422.3	65671.1	17018	76735.7	35667.6	44840.5	130039	36950	355.217	393648	22360.2	706680	75365.3	1.31945e+06	466919	126244	139627	88564.8	26050.5	68669	32262.6
P49207|RL34_HUMAN	4	4	135.46	0.248494	0.0721879	2.0728	0.274338	Control	Competition	P49207	5.74388e+06	4.87094e+06	6.02021e+06	6.98951e+06	5.26475e+06	5.98492e+06	4.14335e+06	484583	2.62547e+06	2.15933e+06	3.50776e+06	3.90417e+06	5.81356e+06	81276.5	4.85119e+06	3.54037e+06	2.4588e+06	6.12996e+06	4.65173e+06	6.20064e+06	4.59277e+06	9.21523e+06	4.94315e+06	1.03783e+07	5.12465e+06	991803	4.30038e+06	6.80446e+06	5.48172e+06	1.01384e+07	5.18472e+06	156141	4.85119e+06	5.98017e+06	2.57104e+06	1.16211e+07
P62266|RS23_HUMAN;D6RD47|D6RD47_HUMAN;D6R9I7|D6R9I7_HUMAN	4	4	254.26	0.25062	0.0727177	1.2489	0.272727	Probe	Control	P62266	420159	293504	614447	624869	481553	261952	602672	448893	511585	315655	559669	296626	654568	513919	682488	465525	564686	486465	340269	373626	468757	823851	452136	454246	745408	918756	837949	994686	874620	770283	583765	987294	682488	786337	590464	922236
H0Y7Z1|H0Y7Z1_HUMAN	1	1	43.06	0.253581	0.0734883	3.79764	0.27051	Competition	Control	H0Y7Z1	6934.4	9575.94	13875.9	0	0	8001.08	19370.1	2994.38	39866.5	35238	45923.9	2388.41	51738	0	0.00707066	6408.51	25567.3	799.512	5615.89	12190	10585.8	0	0	13874.5	23957.6	6128.65	65299.2	111041	71767.3	6202.26	46141.6	0	0.00707066	10824.9	26734.5	1515.71
Q9H1C4|UN93B_HUMAN	1	1	34.75	0.25633	0.0741956	47.081	0.268477	Competition	Control	Q9H1C4	0	4556.16	0	3200.32	0	0	72056.2	1.77654	110275	10084	172766	0	15684.1	0	6285.61	87080.8	0	4820.81	0	5799.92	0	4219.42	0	0	89121.9	3.63608	180624	31776.4	269989	0	13987.6	0	6285.61	147092	0	9139.26
P78386|KRT85_HUMAN;F5GYI5|F5GYI5_HUMAN	8	1	289	0.257063	0.0743181	6.70041	0.26794	Probe	Competition	P78386	8572.76	23543.7	63499.2	77981.9	8022.97	29537.9	21538.3	18400.7	8546.06	8000.38	9410.36	19185.6	5837.06	25657.3	14975.6	29430.7	94440.5	399739	6942.72	29970.8	48443.1	102814	7532.87	51221.1	26639.4	37661	13998	25210.6	14706	49821.5	5205.68	49290.5	14975.6	49712.5	98751.7	757823
P35579|MYH9_HUMAN;P35749|MYH11_HUMAN;P35580|MYH10_HUMAN;Q5BKV1|Q5BKV1_HUMAN;Q7Z406|MYH14_HUMAN;A0A0C4DFM8|A0A0C4DFM8_HUMAN;A0A2R8Y4C3|A0A2R8Y4C3_HUMAN;B1AH99|B1AH99_HUMAN;M0QY43|M0QY43_HUMAN	22	22	885.63	0.257925	0.0744778	1.57307	0.26731	Probe	Control	P35579	162467	418476	169027	265849	400805	330549	304070	201704	438194	351027	311373	424479	681671	608793	455119	156559	337355	508920	131575	532714	128950	350505	376321	573200	376086	412832	717737	1.10615e+06	486595	1.1023e+06	607936	1.16956e+06	455119	264450	352755	964807
Q8IZL8|PELP1_HUMAN;C9JFV4|C9JFV4_HUMAN;I3L1P4|I3L1P4_HUMAN;E7EV54|E7EV54_HUMAN;I3L445|I3L445_HUMAN	3	3	145.5	0.259656	0.0748878	5.32704	0.266051	Competition	Control	Q8IZL8	10078.7	26200.1	13126.5	11794.6	9763.3	14164.3	5775.59	110997	271191	20742.3	29957.4	14815	8337.73	119409	14291.1	17727	38519	62546.2	8162.29	33352.3	10014.1	15550.4	9166.89	24562	7143.47	227178	444195	65362.8	46815.7	38471.8	7435.85	229398	14291.1	29943.4	40277.4	118575
M0R0Y2|M0R0Y2_HUMAN;M0R027|M0R027_HUMAN;M0R058|M0R058_HUMAN;M0R213|M0R213_HUMAN;A0A087WZQ7|A0A087WZQ7_HUMAN	5	5	235.66	0.260154	0.0749417	1.37226	0.265691	Control	Competition	M0R0Y2	848588	763703	909222	850024	720666	648166	615991	453235	587323	581052	718699	498135	744401	749252	878044	220404	709716	888642	687236	972184	693639	1.1207e+06	676643	1.12397e+06	761881	927645	962002	1.831e+06	1.12314e+06	1.29357e+06	663881	1.43939e+06	878044	372293	742114	1.68468e+06
P20337|RAB3B_HUMAN	2	1	96	0.262857	0.0756298	2.91175	0.26375	Competition	Probe	P20337	5159.83	12202.2	1207.52	6918.39	1068.39	18236.2	6146.57	6984.31	75822.4	7828.48	3949.57	18195.5	2586.93	16889.3	1122.28	15567	758.855	3919.53	4178.74	15533.2	921.209	9121.47	1003.13	31623	7602.31	14294.9	124193	24669	6172.16	47250.4	2307.11	32446.1	1122.28	26294.8	793.497	7430.61
Q3ZCQ8|TIM50_HUMAN;M0R0C3|M0R0C3_HUMAN;M0QXC3|M0QXC3_HUMAN;M0R047|M0R047_HUMAN	6	5	215.21	0.265774	0.0762991	3.03122	0.26168	Competition	Control	Q3ZCQ8	50286.2	7662.96	57224.3	3628.12	12148.9	10823.5	118261	107068	55921.5	73396.4	68764.1	6337.87	151647	2538.95	70402.4	5153.49	91265.7	30787.2	40724.8	9754.85	43656	4783.44	11406.7	18768.9	146270	219137	91596.4	231285	107461	16458.3	135243	4877.61	70402.4	8704.96	95432	58366.1
A0A286YES1|A0A286YES1_HUMAN;A0A0A0MS07|A0A0A0MS07_HUMAN	2	2	49.77	0.265818	0.0762991	4.54532	0.261649	Probe	Competition	A0A286YES1	2.54438e+06	2.1765e+06	5.68054e+06	9.58649e+06	1.75461e+06	2.3637e+06	1.79699e+06	1.62595e+06	1.39608e+06	1.75632e+06	1.35159e+06	1.5605e+06	1.39395e+07	2.27193e+07	1.60517e+06	657478	1.86376e+06	2.33818e+06	2.06058e+06	2.77065e+06	4.33364e+06	1.26392e+07	1.64742e+06	4.09885e+06	2.22259e+06	3.32786e+06	2.28671e+06	5.53449e+06	2.11218e+06	4.05233e+06	1.24317e+07	4.36463e+07	1.60517e+06	1.11057e+06	1.94884e+06	4.43271e+06
E9PEB5|E9PEB5_HUMAN;C9JSZ1|C9JSZ1_HUMAN	4	3	132.62	0.266904	0.0765195	2.34628	0.260885	Competition	Probe	E9PEB5	23405.7	40416.2	8226.37	65192.5	34720.2	196181	71435.3	12446.2	144583	144144	167103	141308	94258.6	18430.5	61821.6	19419.5	57637.5	38686.8	18955.3	51449.3	6275.84	85952.2	32599.2	340194	88353.9	25473.9	236820	454224	261139	366951	84062.9	35407.1	61821.6	32802.3	60268.7	73342.1
E9PSI1|E9PSI1_HUMAN	3	1	98.96	0.267727	0.076664	2.37982	0.260309	Competition	Control	E9PSI1	1616.65	41469.8	8880.87	12431.1	85.3915	88919.4	7756.32	23985.6	7707.37	107480	127699	90443.9	25644.9	57068.9	6652.05	78729.8	4446.04	8242.38	1309.26	52790.5	6775.15	16389.6	80.1752	154194	9593.31	49091.6	12624.2	338689	199560	234866	22871	109636	6652.05	132986	4649	15625.8
Q02809|PLOD1_HUMAN	2	2	81.82	0.269261	0.0770117	9.10504	0.25924	Competition	Control	Q02809	5664.15	1334.63	954.013	3294.48	2506.32	1040.41	22567.6	4749.53	26106.7	5642.22	58160.1	17473.8	28297.1	22901.9	11533.8	0	3181.25	3839.8	4587.16	1698.96	727.809	4343.56	2353.22	1804.16	27912.4	9720.93	42761.3	17779.7	90889.3	45376.4	25236.3	43997.1	11533.8	0	3326.47	7279.47
A0A075B716|A0A075B716_HUMAN;H0YN73|H0YN73_HUMAN	3	3	109.24	0.272821	0.0779372	4.18922	0.256785	Competition	Control	A0A075B716	22727.5	38416.3	19504	30524.5	37346.4	36326.1	64956.9	4321.17	365194	90482.1	140434	108968	20783	25295.8	54019.6	67365.4	37937.9	60023.7	18406	48903.4	14879.4	40244.6	35065	62992.5	80341.2	8844.21	598168	285126	219462	282970	18535	48595.9	54019.6	113790	39669.7	113793
Q7RTV2|GSTA5_HUMAN	2	2	61.05	0.273922	0.078159	1.55248	0.256034	Probe	Competition	Q7RTV2	361206	304903	319579	389444	238355	53454.3	205275	308333	194659	94277.9	208733	119406	266850	301619	276967	251137	235286	423509	292526	388137	243805	513458	223795	92694.1	253892	631071	318840	297087	326196	310076	237985	579442	276967	424206	246026	802885
P53701|CCHL_HUMAN	2	2	81.56	0.275873	0.0786224	8.67133	0.254711	Competition	Control	P53701	15599.2	25670.3	10928.2	6738.27	22192.5	185.803	111795	145635	220701	489.322	222737	3744.74	120359	66046.6	87600.4	5458.26	43967.5	19009.7	12633.1	32677.9	8337.01	8883.99	20836.8	322.198	138272	298073	361496	1541.94	348081	9724.41	107340	126883	87600.4	9219.76	45974.6	36038.4
F8W7Q4|F8W7Q4_HUMAN;E9PH05|E9PH05_HUMAN	2	2	110.84	0.278818	0.0793676	7.293	0.252733	Competition	Control	F8W7Q4	41027.9	6714.56	21683.7	35839.1	23824.7	24839.9	163446	2740.89	502100	22923.6	346512	84888.6	31285.4	40317.6	55198.2	82070.9	17958.4	95256.9	33226.8	8547.54	16542.3	47251.5	22369.3	43074.5	202156	5609.83	822413	72236.4	541509	220440	27901.4	77454.5	55198.2	138629	18778.2	180587
A0A087X1B7|A0A087X1B7_HUMAN	1	1	39.3	0.2854	0.0811451	4.3338	0.248401	Control	Competition	A0A087X1B7	112960	0	179241	209277	21826.7	0	0	39519.2	3333.01	66214.3	0	11683.1	31159.3	103053	64241.1	36767.9	23060.2	61733.1	91481.3	0	136742	275918	20493.4	0	0	80884.7	5459.29	208653	0	30338.9	27788.9	197975	64241.1	62106.1	24112.9	117033
O76013|KRT36_HUMAN;Q6A162|K1C40_HUMAN	2	1	145.14	0.287828	0.0816935	2.36477	0.246831	Probe	Competition	O76013	1.04368e+06	730111	532363	114146	774770	80293.8	682091	44270.6	204586	807694	303244	805958	808862	792392	346448	273213	2.44435e+06	2.06924e+06	845234	929421	406135	150495	727442	139236	843637	90609.4	335101	2.54519e+06	473892	2.09293e+06	721369	1.52227e+06	346448	461495	2.55593e+06	3.92285e+06
J3KPP4|J3KPP4_HUMAN;D6RDI2|D6RDI2_HUMAN	3	3	241.41	0.288008	0.0816935	2.5835	0.246716	Probe	Competition	J3KPP4	544439	476698	808503	751369	742512	49517	214894	233550	257089	237092	279715	143248	482212	379541	878992	78802.9	941149	767302	440919	606829	616801	990633	697155	85866.5	265789	478011	421097	747121	437123	371989	430052	729139	878992	133109	984112	1.45465e+06
P49189|AL9A1_HUMAN	2	2	73.93	0.28871	0.0817961	26.4534	0.246265	Competition	Control	P49189	0	2704.99	1869.68	0	0	0	0	21370.8	2555.84	30080.1	67008.6	0	6443.83	0	0	0	0	5221.74	0	3443.41	1426.37	0	0	0	0	43739.9	4186.33	94787.8	104717	0	5746.81	0	0	0	0	9899.33
Q14315|FLNC_HUMAN	8	4	380.77	0.290343	0.082162	3.19423	0.245222	Competition	Control	Q14315	43631.6	17868.6	39929.3	16394.1	45622.7	17935.1	94706.5	26114.6	38609.7	10805.3	227010	182127	57469.2	18594.8	72123.6	25021.9	50666.8	110367	35335.4	22746.5	30461.7	21614.6	42835.7	31100.9	117137	53449.1	63240.6	34049.6	354758	472952	51252.9	35722.6	72123.6	42265.4	52979.7	209232
A0A087WZT3|A0A087WZT3_HUMAN	1	1	65.01	0.293736	0.0830245	8.90852	0.243077	Competition	Control	A0A087WZT3	1122.4	7238.57	7721.99	11558.5	12517.2	54616.3	83125.6	9769.36	56950.5	170958	208198	315304	28353	209982	13918.8	0	22009.2	159732	908.984	9214.6	5891.05	15239.2	11752.6	94709.2	102813	19995.1	93281.9	538718	325360	818786	25286.1	403398	13918.8	0	23013.9	302820
B5MDF5|B5MDF5_HUMAN;J3KQE5|J3KQE5_HUMAN;F5H018|F5H018_HUMAN;H0YFC6|H0YFC6_HUMAN;B4DV51|B4DV51_HUMAN	8	8	394.94	0.296528	0.0837153	2.23347	0.241332	Competition	Control	B5MDF5	1.47681e+06	1.25247e+06	1.00376e+06	1.08639e+06	1.35815e+06	991112	2.65312e+06	356590	3.87944e+06	1.29486e+06	4.16944e+06	3.65765e+06	2.33188e+06	1.57067e+06	1.9598e+06	1.14031e+06	1.56381e+06	1.17424e+06	1.19601e+06	1.59438e+06	765764	1.43234e+06	1.27518e+06	1.71867e+06	3.28149e+06	729839	6.35431e+06	4.08033e+06	6.51576e+06	9.49824e+06	2.07964e+06	3.01742e+06	1.9598e+06	1.92615e+06	1.6352e+06	2.22611e+06
H0YKF0|H0YKF0_HUMAN	1	1	27.45	0.30218	0.085211	1.799	0.23786	Competition	Control	H0YKF0	7199.4	37378	1462.38	33475.6	35522.9	224775	36268.9	87292	9008.44	10184.3	15469.2	453101	33018.4	81564.4	50627.7	279858	77205.2	75034.6	5830.5	47581.6	1115.64	44135.4	33352.9	389778	44858.7	178662	14755.3	32092.5	24174.4	1.17662e+06	29446.8	156694	50627.7	472720	80729.6	142250
Q3KNR6|Q3KNR6_HUMAN	1	1	48.82	0.303006	0.0852806	3.75913	0.237359	Competition	Control	Q3KNR6	41816.1	39654.2	162140	28997.5	22443.2	0	245000	32725.4	30344.6	337266	445089	18710.1	20453.5	25213	266399	10919.8	121700	29620.9	33865.1	50479.2	123696	38231.4	21072.2	0	303025	66979.6	49702.8	1.06279e+06	695559	48586.8	18241.1	48437	266399	18445	127256	56155.2
Q9BV86|NTM1A_HUMAN	1	1	57.26	0.303423	0.0852806	1.64761	0.237107	Competition	Control	Q9BV86	6562.51	9509.63	14690.1	33493.9	4357.15	23618.4	28713.7	16484.9	12148.4	30682.9	32185.5	31746.7	15287.4	0	9530.03	52450.1	13909.8	4307.47	5314.7	12105.6	11207	44159.6	4090.98	40956.2	35514.3	33739.9	19898.4	96687.5	50297.6	82440.3	13633.8	0	9530.03	88595.5	14544.8	8166.08
E7EPK1|E7EPK1_HUMAN;G3V1Q4|G3V1Q4_HUMAN;A0A0U1RRD1|A0A0U1RRD1_HUMAN;A0A0U1RRE1|A0A0U1RRE1_HUMAN	3	2	102.5	0.30349	0.0852806	2.51721	0.237066	Competition	Control	E7EPK1	78040.2	45076.2	80293	54600	58886.1	94368.8	59261	125802	342400	383587	90581	33605.8	67522.8	45904.2	177948	140536	53736.3	24323.5	63201.6	57381.4	61254.9	71986.7	55288.9	163643	73296.2	257481	560833	1.20875e+06	141555	87268.1	60219	88187	177948	237385	56189.3	46112.4
P22528|SPR1B_HUMAN	2	2	50.21	0.306676	0.085994	2.6571	0.235151	Control	Competition	P22528	336153	143585	191549	113445	260167	74009.5	125197	66783.2	108034	44788.8	49000.9	27295.8	99291.5	0	106781	145984	57249.1	59190.6	272236	182781	146131	149570	244274	128339	154849	136686	176954	141138	76575.9	70882.2	88551.4	0	106781	246587	59862.5	112213
P22059|OSBP1_HUMAN;A0A0A0MSB4|A0A0A0MSB4_HUMAN	3	3	129.47	0.306744	0.085994	2.52224	0.235111	Competition	Control	P22059	300421	511509	255191	330906	376806	458534	290442	1.03202e+06	1.98332e+06	184058	505276	1.63796e+06	175670	1.1625e+06	348498	542075	524250	409960	243298	651144	194683	436278	353788	795137	359229	2.11225e+06	3.24857e+06	580001	789617	4.25349e+06	156668	2.2333e+06	348498	915640	548182	777199
X6R2S6|X6R2S6_HUMAN	1	1	37.08	0.31032	0.0868951	9.28484	0.232991	Competition	Control	X6R2S6	23614.8	69808.7	44918.1	108446	56485	38493.8	327378	93004.4	647436	736370	762198	606858	211459	1.57737e+06	114046	0	50461.9	337089	19124.6	88865.5	34267.7	142979	53034.5	66751.4	404914	190354	1.06047e+06	2.32043e+06	1.19112e+06	1.5759e+06	188586	3.03031e+06	114046	0	52765.4	639051
A0A0A0MRB1|A0A0A0MRB1_HUMAN	1	1	77	0.313623	0.0877178	3.82851	0.231058	Competition	Control	A0A0A0MRB1	24944	38516.3	7109.56	26582.5	28047.6	41176.2	66098.7	5196.98	144717	67794.5	183655	169511	98772.6	90595.2	62795.9	2726.1	1436.2	48057.3	20201.1	49030.7	5423.83	35047.4	26334.3	71403	81753.5	10636.7	237038	213633	287005	440189	88088.6	174043	62795.9	4604.77	1501.76	91106.7
A0A2R8YEM3|A0A2R8YEM3_HUMAN;E7ENU7|E7ENU7_HUMAN;A0A2R8Y738|A0A2R8Y738_HUMAN	7	7	510.04	0.313987	0.0877178	1.36255	0.230846	Probe	Control	A0A2R8YEM3	3.77869e+06	2.85037e+06	4.2266e+06	4.86299e+06	4.45505e+06	1.96312e+06	4.20749e+06	3.18306e+06	4.39297e+06	2.75594e+06	5.12753e+06	3.23647e+06	4.59687e+06	5.04032e+06	5.35964e+06	2.19061e+06	5.35842e+06	7.61655e+06	3.06021e+06	3.62848e+06	3.22444e+06	6.41154e+06	4.18291e+06	3.40421e+06	5.20398e+06	6.51482e+06	7.19544e+06	8.68447e+06	8.01302e+06	8.40452e+06	4.09964e+06	9.68301e+06	5.35964e+06	3.70024e+06	5.60303e+06	1.44394e+07
E5RHJ4|E5RHJ4_HUMAN	1	1	53.31	0.314574	0.0877798	2.71715	0.230505	Competition	Control	E5RHJ4	31926.4	24506	46772.9	35211.3	48051.3	55641.1	87721.5	0	304299	0	175914	89912.2	203483	156049	151230	30307.2	2746.7	63959.4	25855.9	31195.8	35682.7	46423.8	45116	96486.3	108497	0	498426	0	274908	233486	181473	299787	151230	51193.1	2872.08	121254
O60488|ACSL4_HUMAN;H0Y9A0|H0Y9A0_HUMAN	2	1	85.24	0.318682	0.0888231	7.31361	0.228143	Competition	Control	O60488	2389.92	4625.62	4727.17	3156.37	1556.21	2102.22	6796.68	2616.58	7768.31	108541	4433.48	5565.98	25382.6	609.02	16481.9	10550.3	7439.5	914.028	1935.5	5888.35	3606.32	4161.47	1461.14	3645.43	8406.39	5355.41	12724.1	342033	6928.39	14453.8	22637	1169.99	16481.9	17820.9	7779.12	1732.81
Q16543|CDC37_HUMAN;K7EQA9|K7EQA9_HUMAN;K7EKQ2|K7EKQ2_HUMAN;K7EL68|K7EL68_HUMAN;K7EIU0|K7EIU0_HUMAN	7	6	258.45	0.325976	0.0907509	2.156	0.224035	Competition	Control	Q16543	507149	424187	403685	226311	378350	87709.3	724954	203467	1.42915e+06	256582	1.40733e+06	349582	417954	152582	610344	434593	664578	686140	410719	539984	307968	298377	355238	152095	896651	416440	2.34087e+06	808536	2.19929e+06	907801	372745	293126	610344	734087	694916	1.30078e+06
A0A2R8Y543|A0A2R8Y543_HUMAN	2	2	71.55	0.330503	0.0919048	5.66804	0.221541	Competition	Control	A0A2R8Y543	35671.4	8558.98	6656.96	1046.23	6258.9	2552.2	44908.5	2621.91	129475	69595.9	96325.4	1377.07	46468	1823.57	61692.2	775.568	11321.6	2178.31	28888.8	10895.5	5078.54	1379.39	5876.56	4425.72	55544.6	5366.32	212073	219309	150532	3576	41441.6	3503.28	61692.2	1310.04	11838.4	4129.63
Q9Y3U8|RL36_HUMAN;J3QSB5|J3QSB5_HUMAN;J3KTD3|J3KTD3_HUMAN	4	4	249.05	0.331215	0.0919964	2.02844	0.221152	Control	Competition	Q9Y3U8	541606	665641	725761	417754	734705	762243	616089	128266	449272	253424	449832	0	470374	159236	814229	277073	15541.8	1.35157e+06	438624	847351	553678	550783	689824	1.32179e+06	762002	262524	735883	798584	702972	0	419495	305909	814229	468015	16251.3	2.5623e+06
Q13011|ECH1_HUMAN;M0R248|M0R248_HUMAN;M0QZW4|M0QZW4_HUMAN;M0QXS7|M0QXS7_HUMAN	8	7	359.64	0.331636	0.0920073	1.40638	0.220923	Competition	Probe	Q13011	1.5124e+06	1.14468e+06	1.33901e+06	1.20716e+06	1.16585e+06	1.07301e+06	1.03891e+06	592977	1.08067e+06	2.10378e+06	1.77978e+06	2.22041e+06	1.66128e+06	418574	975416	365925	1.84729e+06	1.00046e+06	1.22483e+06	1.45716e+06	1.02152e+06	1.59156e+06	1.09463e+06	1.86069e+06	1.28497e+06	1.21366e+06	1.77007e+06	6.6294e+06	2.78133e+06	5.76601e+06	1.48158e+06	804126	975416	618098	1.93162e+06	1.89666e+06
G3V325|G3V325_HUMAN	1	1	42.61	0.332508	0.0921429	1.84472	0.220449	Competition	Control	G3V325	1111.48	14139.7	3512.07	12940.8	6.32687	89939.5	6071.59	8269.47	172716	24968.3	7491.58	4892.24	5361.85	7581.76	7855.22	40266.4	12503.9	48488.3	900.14	17999.7	2679.33	17061.6	5.94038	155962	7509.58	16925.3	282900	78679.5	11707.4	12704.3	4781.87	14565.4	7855.22	68015.5	13074.7	91923.8
Q13151|ROA0_HUMAN	4	3	241.35	0.33689	0.0932498	1.65929	0.218089	Control	Probe	Q13151	9207.68	8725.1	20206.3	20898.2	11480.3	19686.9	13769.6	13622.5	29816.3	19767.8	551.698	1745.82	11389	125.836	14351.6	654.758	11572.4	16269.8	7456.92	11106.9	15415.2	27553	10779	34138.8	17030.8	27881.5	48837.4	62292	862.162	4533.58	10157	241.745	14351.6	1105.98	12100.7	30844.1
A0A0A6YYA0|A0A0A6YYA0_HUMAN;G3V2Y2|G3V2Y2_HUMAN	5	5	224.91	0.339962	0.0939918	21.7673	0.216458	Competition	Control	A0A0A6YYA0	8440.6	7305.23	14837.4	26071.9	15037.4	7710.39	262588	53.8978	860324	37727.3	315983	251707	144464	15202.7	78851.8	255207	35182.3	47967.8	6835.7	9299.45	11319.3	34374.1	14118.8	13370.5	324779	110.314	1.40916e+06	118885	493801	653637	128838	29206.1	78851.8	431080	36788.4	90937.1
O43242|PSMD3_HUMAN	1	1	58.81	0.341985	0.0944426	3.91908	0.215392	Competition	Control	O43242	51935.3	48462.8	40595.3	122506	87581.9	115157	314923	107247	594256	16664.9	632244	161891	223715	27881.3	167411	208080	6197.37	149657	42060.3	61692.4	30969.9	161516	82231.8	199691	389509	219504	973358	52514.1	988034	420401	199516	53562.9	167411	351477	6480.28	283719
Q5D862|FILA2_HUMAN	19	19	1248.59	0.343789	0.0948319	2.33229	0.214449	Control	Competition	Q5D862	1.43072e+06	732846	924305	1.00299e+06	1.21284e+06	103118	720301	1.05959e+06	270366	50930	191748	25308.6	1.40508e+06	1.12928e+06	572951	9192.03	775177	994022	1.15868e+06	932903	705145	1.32238e+06	1.13876e+06	178815	890896	2.16868e+06	442844	160490	299653	65721.9	1.25309e+06	2.16946e+06	572951	15526.6	810563	1.88446e+06
E7ETT1|E7ETT1_HUMAN;C9JQS9|C9JQS9_HUMAN;F8WBI9|F8WBI9_HUMAN;E7ENC1|E7ENC1_HUMAN	4	4	267.07	0.347086	0.0956318	2.47534	0.21274	Control	Competition	E7ETT1	869794	1.08466e+06	1.12581e+06	987603	693229	67744.3	460234	424227	310498	92345.4	347001	316470	442301	286595	681298	47831.2	495377	551301	704410	1.38075e+06	858870	1.30209e+06	650882	117474	569236	868272	508579	290997	542273	821816	394458	550579	681298	80793.6	517991	1.04515e+06
F6SFZ6|F6SFZ6_HUMAN	1	1	71.54	0.35048	0.0964565	3.09216	0.211001	Probe	Competition	F6SFZ6	18360.5	397.209	25228.4	95.3699	1094.97	1647.52	13002.5	0	4852.62	8134.84	1228.7	6537.95	24180.5	9893.13	37112	606.71	22724.4	9864.26	14869.5	505.641	19246.5	125.739	1028.08	2856.93	16082	0	7948.33	25634.4	1920.15	16977.9	21564.9	19005.8	37112	1024.82	23761.8	18700.6
A0A0A0MTN3|A0A0A0MTN3_HUMAN;A0A3B3IRM5|A0A3B3IRM5_HUMAN	2	2	67.86	0.352004	0.0967651	4.53262	0.210226	Competition	Control	A0A0A0MTN3	10787.5	6.1798	6108.87	1482.18	1099.45	3478.04	2280.91	7800.1	2990.07	30917.8	1461.87	58628.3	8157.4	589.714	2802.71	58425.8	2661.67	181.039	8736.35	7.8668	4660.41	1954.16	1032.28	6031.2	2821.11	15964.6	4897.57	97427.7	2284.52	152247	7275.03	1132.9	2802.71	98689.3	2783.17	343.213
Q16658|FSCN1_HUMAN	2	1	68.81	0.358132	0.0983373	1.98996	0.207153	Control	Probe	Q16658	8238.76	1124.14	15596.5	11262.8	20445.2	13679.2	2440.11	11118.4	29821.9	16306.8	5142.47	2956.38	0	4506.46	7890.37	8143.01	9769.55	5041.38	6672.23	1431.01	11898.5	14849.3	19196.2	23720.9	3018.02	22756.2	48846.6	51385.6	8036.36	7677.17	0	8657.41	7890.37	13754.7	10215.5	9557.41
Q12805|FBLN3_HUMAN;A0A0U1RQV3|A0A0U1RQV3_HUMAN;C9J4J8|C9J4J8_HUMAN	3	3	135.4	0.360328	0.0988274	3.81747	0.206068	Competition	Probe	Q12805	13285.5	16921.6	71229	21493.9	23046.1	12323.6	18675	6940.8	10352.2	136718	137975	216765	24124.2	43292.5	8728.04	43133.8	11447.3	7435.37	10759.4	21541	54340.1	28338.4	21638.3	21370.1	23097.9	14205.9	16956.3	430823	215620	562899	21514.7	83169.5	8728.04	72858.9	11969.8	14095.9
P60059|SC61G_HUMAN	2	2	46.23	0.36102	0.0989044	1.63944	0.205727	Competition	Probe	P60059	5764.09	105224	5815.99	28413.3	16854.1	91356.7	31902.9	34541.3	108216	24278.8	52822.6	89889.5	2078.31	17923.3	17234.3	94340.7	20357.9	56461	4668.1	133949	4436.98	37461.1	15824.5	158420	39458.8	70696.3	177252	76506.9	82548.2	233427	1853.5	34432.5	17234.3	159355	21287.2	107038
Q9UL25|RAB21_HUMAN	4	4	304.94	0.362147	0.0991002	1.97722	0.205175	Competition	Control	Q9UL25	75408.4	41118.9	68568.9	49391.6	103412	42297.3	88003.8	15997	148759	98950.3	257940	142082	79487	165795	61698.1	27868.6	37392	30242.7	61070.1	52343.8	52310.7	65119.8	97094.5	73347	108846	32741.3	243659	311810	403094	368961	70889.1	318510	61698.1	47074	39098.9	57333.9
D6R9I9|D6R9I9_HUMAN	2	2	63.45	0.363958	0.0994826	3.55816	0.204291	Competition	Control	D6R9I9	32804.3	19355.3	21502.7	9833.94	38391.2	0	35905.6	13632.2	248481	15285.5	95400.4	24990.1	29128.3	7164.94	68934.5	15856.3	36711.1	445.411	26566.8	24639.1	16404.2	12965.4	36046	0	44409.4	27901.4	406998	48167.4	149086	64894.9	25977.6	13764.6	68934.5	26783.5	38387	844.406
Q92688|AN32B_HUMAN;H0YN26|H0YN26_HUMAN	3	3	122.01	0.368739	0.100675	2.92412	0.201982	Competition	Probe	Q92688	65106.2	41839.4	74105.3	936590	162156	18089.1	207358	32331.9	384411	308000	392766	27048.6	124734	12135	97205.4	24536	176890	26831.8	52726.8	53261	56534.3	1.23483e+06	152250	31368	256469	66174.2	629644	970564	613792	70240.2	111242	23312.7	97205.4	41444.7	184965	50867.6
Q86YZ3|HORN_HUMAN	20	20	2361.98	0.371755	0.101383	1.83698	0.200545	Control	Competition	Q86YZ3	4.03299e+06	4.52538e+06	1.64113e+06	2.08323e+06	4.13174e+06	838432	1.94037e+06	1.25232e+06	4.25182e+06	622000	1.12155e+06	203951	3.34217e+06	2.0849e+06	1.55387e+06	32892.1	1.71864e+06	1.44165e+06	3.26615e+06	5.76075e+06	1.25201e+06	2.74661e+06	3.87935e+06	1.45391e+06	2.39993e+06	2.56315e+06	6.96425e+06	1.96004e+06	1.75269e+06	529624	2.98066e+06	4.00532e+06	1.55387e+06	55559.3	1.79709e+06	2.73307e+06
Q9UHB9|SRP68_HUMAN	2	2	67	0.374231	0.101943	1.59534	0.199375	Probe	Control	Q9UHB9	206794	56573.9	156424	254682	194465	134070	268730	454245	252847	254991	186120	65426	417039	269126	160202	151341	151557	450878	167474	72017.8	119335	335783	182586	232488	332376	929711	414150	803524	290858	169899	371929	517020	160202	255637	158476	854772
A0A3B3IUA7|A0A3B3IUA7_HUMAN	1	1	19.71	0.379834	0.103352	18.7037	0.196763	Competition	Control	A0A3B3IUA7	0	2292.64	0	620.622	2011.45	1468.44	4513.85	0	6656.59	96066.3	8591.69	3746.92	5354.33	61.473	0	0	2874.94	1625.74	0	2918.5	0	818.251	1888.58	2546.39	5582.91	0	10903.1	302722	13426.6	9730.08	4775.16	118.096	0	0	3006.18	3082.08
M0QXG9|M0QXG9_HUMAN	1	1	105.91	0.382015	0.103829	9.14527	0.195759	Competition	Control	M0QXG9	4288.3	3287.73	7098.9	0	0	0	1926.66	7378.18	28475	61379.1	35047.2	0	25896.6	34155.9	0	0	0	18668.1	3472.92	4185.23	5415.69	0	0	0	2382.97	15101	46640.5	193417	54769.7	0	23095.4	65617.2	0	0	0	35390.9
F5GX59|F5GX59_HUMAN	1	1	41.67	0.385366	0.104621	1.36412	0.19423	Control	Competition	F5GX59	7.36715e+06	1.26829e+07	9.16513e+06	1.25379e+07	1.15855e+07	2.1972e+07	7.95354e+06	1.60836e+07	5.59671e+06	1.06283e+07	5.0877e+06	9.85824e+06	1.03699e+07	2.02074e+07	7.78666e+06	1.60564e+07	6.01468e+06	1.08851e+07	5.96635e+06	1.61452e+07	6.992e+06	1.65305e+07	1.08778e+07	3.81013e+07	9.83724e+06	3.29186e+07	9.1671e+06	3.34919e+07	7.95077e+06	2.56001e+07	9.24817e+06	3.88207e+07	7.78666e+06	2.71215e+07	6.28925e+06	2.06359e+07
E7EMC7|E7EMC7_HUMAN	1	1	32.74	0.387567	0.1051	3.72952	0.193235	Probe	Control	E7EMC7	46241.3	8116.49	45338.1	2902.36	35777.2	37569.6	20357.5	48538.5	29866.1	122980	5333.39	146164	231947	3855.05	177320	41814.9	161755	39496.9	37448.9	10332.2	34588.1	3826.57	33591.6	65148.8	25179	99344.6	48919	387533	8334.72	379561	206858	7405.97	177320	70631.1	169140	74878
P04181|OAT_HUMAN	2	2	95.31	0.388248	0.105166	1.36265	0.192928	Control	Competition	P04181	2.1565e+07	2.09254e+07	2.38746e+07	3.19189e+07	1.93592e+07	4.65609e+07	1.91854e+07	3.81007e+07	1.21714e+07	2.61151e+07	1.23683e+07	1.25624e+07	2.50396e+07	4.63287e+07	1.78831e+07	3.90436e+07	1.15843e+07	1.8105e+07	1.74646e+07	2.66378e+07	1.82138e+07	4.20831e+07	1.81766e+07	8.07404e+07	2.37293e+07	7.79813e+07	1.99361e+07	8.22934e+07	1.93285e+07	3.26223e+07	2.23312e+07	8.90025e+07	1.78831e+07	6.595e+07	1.21132e+07	3.43233e+07
A0A087WZJ8|A0A087WZJ8_HUMAN;Q9BT22|ALG1_HUMAN	1	1	24.59	0.389798	0.105467	3.01342	0.192233	Competition	Probe	A0A087WZJ8	27602.8	29595.1	20557.6	12390.2	21162.1	4841.07	21932.9	5100.08	182023	66281.5	14368.7	2809.6	30828.2	0	18996.4	3629.89	30627.7	12988.8	22354.4	37674.1	15683.2	16335.7	19869.3	8394.82	27127.5	10438.4	298143	208865	22454.6	7296.02	27493.6	0	18996.4	6131.4	32025.9	24624.2
O60725|ICMT_HUMAN	1	1	39.18	0.391127	0.105695	Infinity	0.191639	Competition	Control	O60725	0	0	0	0	0	0	0	0	0	58038.1	0	0	0	0	0	0	0	0	0	0	0	0	0	0	0	0	0	182888	0	0	0	0	0	0	0	0
H0Y4R1|H0Y4R1_HUMAN;A0A3B3IRL5|A0A3B3IRL5_HUMAN	3	2	108.32	0.391517	0.105695	11.6712	0.191465	Competition	Control	H0Y4R1	7730.2	1553.28	103.969	159.774	3220.88	489.886	27048.8	0	16429.1	13473	64348.3	33437.1	7351.48	0	14509.1	669.189	2134.97	0	6260.38	1977.3	79.3175	210.652	3024.13	849.504	33455	0	26910	42455.8	100560	86830	6556.29	0	14509.1	1130.35	2232.43	0
H0YC23|H0YC23_HUMAN;E5RHC1|E5RHC1_HUMAN	2	2	74.61	0.394681	0.106429	7.26593	0.190064	Competition	Control	H0YC23	6955.85	22273.1	16469.4	4591.84	2015.41	13512.3	3748.33	4416.22	62439.9	236014	5786.11	165825	120403	7253.03	6322.49	82497.3	6098.52	26419	5633.25	28353.4	12564.4	6054.05	1892.3	23431.5	4636.08	9038.74	102273	743722	9042.21	430618	107379	13933.9	6322.49	139349	6376.91	50085
Q52LJ0|FA98B_HUMAN	1	1	38.02	0.397935	0.107187	2.51906	0.188637	Competition	Probe	Q52LJ0	18652.3	5829.01	15087.4	18224.5	16214.3	0	14172.2	4906.03	59416.1	69008	6770.96	28309.9	41120	4380.01	9864.33	4297.32	7191.21	5627.76	15105.7	7420.25	11510.1	24027.9	15223.8	0	17528.7	10041.3	97320.4	217457	10581.3	73515.7	36672.1	8414.47	9864.33	7258.76	7519.49	10669.1
H7C075|H7C075_HUMAN	1	1	38.83	0.398961	0.107343	1.89222	0.188191	Probe	Competition	H7C075	59354.4	129440	72236.2	569024	113701	111560	110091	61611	122845	140480	139648	147552	300526	98262.3	111574	554798	152745	148708	48068.7	164776	55108.4	750222	106756	193455	136165	126100	201214	442679	218233	383167	268019	188773	111574	937131	159718	281919
H0YH33|H0YH33_HUMAN	1	1	41.79	0.40022	0.107561	2.41063	0.187644	Competition	Probe	H0YH33	29546.4	7969.72	6174.51	22617.9	19053.5	12502.7	0	0	62606.4	85491.7	7775.15	12718.5	0	0	20486	10469.7	27108.2	11872.8	23928.4	10145.3	4710.48	29820.3	17889.6	21680.7	0	0	102546	269400	12150.6	33027.7	0	0	20486	17684.8	28345.7	22508.3
H0YHG0|H0YHG0_HUMAN	1	1	79.97	0.401981	0.107914	8.61436	0.186884	Competition	Probe	H0YHG0	8164.03	6267.31	1045.45	0	7082.25	5638.64	0	0	15732.7	142086	77557.4	0	17094.3	0	10229.4	0	0	0	6611.71	7978.2	797.563	0	6649.62	9777.88	0	0	25769.3	447739	121202	0	15245.3	0	10229.4	0	0	0
P42574|CASP3_HUMAN;A8MVM1|A8MVM1_HUMAN;P55212|CASP6_HUMAN	2	2	47.94	0.405228	0.108664	4.91043	0.185491	Competition	Probe	P42574	8342.66	13418.6	5468.11	15134	1805.49	5666.7	79495.2	11002.6	67213.2	1258.97	74786.4	2848.7	4294.2	14360.7	6639.64	6869.05	10344.7	5675.88	6756.38	17081.7	4171.58	19953.2	1695.2	9826.53	98322.7	22519.1	110091	3967.23	116872	7397.56	3829.71	27588.5	6639.64	11602.8	10816.9	10760.3
O43819|SCO2_HUMAN	1	1	41.47	0.41008	0.109745	Infinity	0.183437	Competition	Control	O43819	0	0	0	0	0	0	0	0	0	0	0	87268.6	0	0	0	5848.74	0	5976.87	0	0	0	0	0	0	0	0	0	0	0	226621	0	0	0	9879.33	0	11330.9
A0A0B4J2C3|A0A0B4J2C3_HUMAN	2	2	54.53	0.41017	0.109745	3.90588	0.1834	Competition	Control	A0A0B4J2C3	169089	72126.9	195177	127286	219671	18545.2	892967	81191.7	71377.6	774816	1.18509e+06	126666	669573	18905.9	671157	17409.5	381933	114377	136939	91816.5	148899	167819	206252	32158.9	1.10446e+06	166176	116913	2.44159e+06	1.85199e+06	328930	597147	36320.3	671157	29407	399368	216836
A0A2R8YFA9|A0A2R8YFA9_HUMAN	2	2	59.1	0.420577	0.112294	15.7823	0.179095	Competition	Control	A0A2R8YFA9	1886.31	1520.6	0	60.732	15.2126	2206.52	6295.49	1931.35	0	16945.5	30152.8	34466.1	168.535	11974.3	0	0	2231.4	9578.98	1527.65	1935.7	0	80.0713	14.2833	3826.28	7786.51	3952.92	0	53398.2	47121.1	89502.1	150.305	23004	0	0	2333.27	18159.8
Q99733|NP1L4_HUMAN;C9J6D1|C9J6D1_HUMAN;C9JZI7|C9JZI7_HUMAN;E9PP22|E9PP22_HUMAN;A8MXH2|A8MXH2_HUMAN;E9PKI2|E9PKI2_HUMAN;E9PKT8|E9PKT8_HUMAN;C9J1B1|C9J1B1_HUMAN;H0YCI4|H0YCI4_HUMAN	4	3	262.55	0.420631	0.112294	26.5211	0.179073	Competition	Control	Q99733	6739.09	91853.1	4880.41	0	14486.8	3153.48	435998	0	673734	369887	898638	833797	63101.6	313033	44688.9	80.85	46579.9	39468.5	5457.71	116928	3723.23	0	13601.9	5468.39	539259	0	1.10354e+06	1.16558e+06	1.40434e+06	2.16522e+06	56276.1	601371	44688.9	136.567	48706.3	74824.2
Q15717|ELAV1_HUMAN	2	2	106.85	0.422073	0.112429	4.2715	0.178487	Competition	Control	Q15717	3853.52	5606.09	13350.1	5628.31	11305.7	9664.25	28285	1438.23	73568.8	50431.2	54023.7	3298.83	19973.1	0	15842.6	4124.52	8779.94	24534.5	3120.81	7136.48	10184.7	7420.58	10615	16758.6	34984	2943.65	120502	158918	84425.2	8566.46	17812.7	0	15842.6	6966.88	9180.75	46512.4
O43493|TGON2_HUMAN	2	2	100.15	0.422074	0.112429	10.8124	0.178487	Competition	Control	O43493	2176.26	1725.77	356.899	464.285	3948.38	12285.2	12692	3369.44	23411.4	177671	1779.13	7671.24	13148.8	8559.97	11362.2	35802.1	3173.9	0	1762.47	2196.88	272.276	612.131	3707.18	21303.5	15698	6896.3	38346.5	559873	2780.33	19920.8	11726.5	16444.6	11362.2	60474.7	3318.79	0
A0A2R8Y6J3|A0A2R8Y6J3_HUMAN;Q5T7N0|Q5T7N0_HUMAN;A0A2R8Y4A2|A0A2R8Y4A2_HUMAN	8	8	348.58	0.42569	0.113267	1.7926	0.177028	Competition	Probe	A0A2R8Y6J3	1.06726e+06	936480	896044	720695	700517	980385	1.36783e+06	240404	1.43828e+06	1.00153e+06	1.55811e+06	3.79611e+06	1.32254e+06	39716.6	952228	960720	1.48974e+06	480089	864331	1.19213e+06	683585	950191	657724	1.70007e+06	1.69179e+06	492038	2.35583e+06	3.156e+06	2.43493e+06	9.85781e+06	1.17948e+06	76299.9	952228	1.62279e+06	1.55775e+06	910150
A0A2R8Y4D6|A0A2R8Y4D6_HUMAN;A0A2R8YCK2|A0A2R8YCK2_HUMAN	2	2	56.93	0.427251	0.113557	1.8146	0.176403	Competition	Probe	A0A2R8Y4D6	12228	63266.6	3583.34	0	6797.44	3219.37	4485.69	1484.27	37878.5	23649.1	20685.3	58969.3	504.057	22875.8	4193.75	10510.2	40103.5	2905.87	9902.92	80537.5	2733.7	0	6382.21	5582.66	5548.07	3037.88	62042.9	74522.5	32325.8	153133	449.534	43947	4193.75	17753.2	41934.2	5508.92
Q9NR31|SAR1A_HUMAN;D6RAA2|D6RAA2_HUMAN;H0Y5E8|H0Y5E8_HUMAN	2	2	79.81	0.42899	0.113893	13.028	0.175711	Competition	Control	Q9NR31	4252.87	6410.62	11665.9	2873.21	13615.9	12740.5	55324.4	5327.69	194822	322.171	106291	309621	13248	1030.26	23976.2	38919.4	69871.7	7740.52	3444.22	8160.63	8899.84	3788.15	12784.1	22093	68427.4	10904.3	319108	1015.22	166106	804030	11815	1979.25	23976.2	65740.3	73061.4	14674.4
F5H6E2|F5H6E2_HUMAN	2	2	59.8	0.43019	0.114086	1.79497	0.175235	Probe	Control	F5H6E2	70030.9	58196.7	77245.6	58873.5	117393	72055.9	120550	64539.4	51291.6	71077.2	169651	19550.5	226732	41391.2	178924	35410.5	179147	152944	56715.2	74083.6	58930.1	77620.9	110221	124951	149101	132094	84012.8	223977	265121	50769.2	202207	79517	178924	59813.3	187326	289950
Q9HB40|RISC_HUMAN;I3L4Z3|I3L4Z3_HUMAN	3	3	115.83	0.434584	0.115124	2.35155	0.173507	Competition	Control	Q9HB40	7469.16	237101	12721.5	281808	20506.9	74697.2	250768	57884.4	452138	169363	336126	225318	178620	0	302910	151281	43739	264049	6048.97	301826	9705.16	371546	19254.2	129531	310160	118473	740578	533694	525279	585110	159300	0	302910	255535	45735.7	500582
Q01650|LAT1_HUMAN	2	2	70.62	0.443194	0.117276	2.31932	0.170183	Competition	Control	Q01650	23955.7	5365.19	24462.3	17217.4	18867.2	31688.2	39679	5957.91	38806.1	52783.5	130762	13938.3	19378.6	14202.5	36695	35090.9	16194.1	9500.63	19400.7	6829.82	18662.1	22700.1	17714.6	54950	49076.6	12194.2	63562.2	166330	204347	36195.3	17282.4	27284.6	36695	59273.5	16933.3	18011.2
P27105|STOM_HUMAN;F8VSL7|F8VSL7_HUMAN	2	2	91.41	0.444706	0.117547	4.81168	0.169608	Competition	Control	P27105	0	0	0	0	0	21092.6	14060.3	0	0	0	36803.8	50626.6	47463.9	9817.71	0	0	3319.45	0	0	0	0	0	0	36576.2	17390.4	0	0	0	57514.9	131468	42329.8	18860.9	0	0	3470.99	0
P05121|PAI1_HUMAN	5	5	167.07	0.4468	0.117971	1.2376	0.168815	Control	Competition	P05121	1.25701e+06	905311	914005	1.55181e+06	1.0745e+06	970665	748483	1.10683e+06	651602	945322	698155	1.24177e+06	737924	632625	1.02806e+06	884330	1.01509e+06	1.92836e+06	1.018e+06	1.15245e+06	697287	2.04596e+06	1.00887e+06	1.68321e+06	925753	2.26536e+06	1.06729e+06	2.97888e+06	1.09104e+06	3.22464e+06	658104	1.21534e+06	1.02806e+06	1.49376e+06	1.06143e+06	3.65577e+06
A0A494C0W5|A0A494C0W5_HUMAN;A0A494C0T1|A0A494C0T1_HUMAN;A0A494C1N5|A0A494C1N5_HUMAN	4	4	189.31	0.44874	0.118353	1.54566	0.168085	Probe	Competition	A0A494C0W5	3.80762e+07	1.07042e+08	3.55885e+07	6.83962e+07	5.17994e+07	1.5804e+08	3.16296e+07	1.32226e+08	2.84129e+07	4.08162e+07	3.90252e+07	6.44681e+07	3.75923e+07	7.60052e+07	3.29206e+07	1.06652e+08	9.79649e+07	1.69102e+08	3.08363e+07	1.36263e+08	2.71502e+07	9.0176e+07	4.86351e+07	2.74054e+08	3.91207e+07	2.70629e+08	4.65387e+07	1.28619e+08	6.09863e+07	1.67412e+08	3.35261e+07	1.46014e+08	3.29206e+07	1.8015e+08	1.02437e+08	3.20582e+08
H0YL69|H0YL69_HUMAN;H0YKT8|H0YKT8_HUMAN;H0YLS6|H0YLS6_HUMAN;H0YKS0|H0YKS0_HUMAN;H0YMI6|H0YMI6_HUMAN	3	2	212.83	0.450943	0.118774	3.47516	0.16726	Competition	Control	H0YL69	126880	35101	133970	16413.3	69955.1	4738.74	248154	7592.73	475460	12104	508972	92807.8	122307	7770.97	201202	84.8735	95337.1	24860.7	102755	44683	102205	21640	65681.7	8217.37	306927	15540.2	778778	38141.8	795392	241005	109077	14928.9	201202	143.363	99689.3	47130.7
A0A024RA52|A0A024RA52_HUMAN;C9JCK5|C9JCK5_HUMAN;H3BT36|H3BT36_HUMAN	3	3	183.81	0.451324	0.118774	3.70722	0.167118	Competition	Control	A0A024RA52	18108.6	26470.9	15432.1	26004.3	23173.7	82459.7	12868.1	57911.2	302087	301693	12030	23896.6	46906.3	36906	18628.2	42727.7	28201.3	18471.4	14665.4	33697.1	11773	34285	21758.1	142992	15915.7	118528	494802	950688	18799.8	62055.2	41832.6	70900.4	18628.2	72173.1	29488.7	35018
E5RIP4|E5RIP4_HUMAN	1	1	111.18	0.454753	0.119427	2.75797	0.165847	Competition	Probe	E5RIP4	143991	85028.1	78581.8	98910.1	195625	63196.7	69267.4	87317.4	914576	106205	43198.8	86134.4	42933	51887.4	55495.6	39982	169058	114434	116612	108240	59949.4	130407	183675	109588	85672.6	178714	1.49803e+06	334672	67508.7	223675	38289	99681.3	55495.6	67535.1	176776	216942
Q6ZXV5|TMTC3_HUMAN	1	1	50.31	0.4548	0.119427	5.79176	0.165829	Competition	Control	Q6ZXV5	0	0	0	9716.09	0	33469.6	0	100791	132432	2101.6	0	14796.7	0	38638	0	25177.5	0	0	0	0	0	12810	0	58039.1	0	206290	216917	6622.52	0	38424.3	0	74227.9	0	42528.2	0	0
Q9Y3Z3|SAMH1_HUMAN;A0A2R8YCS7|A0A2R8YCS7_HUMAN;A0A2R8YD90|A0A2R8YD90_HUMAN;A0A2R8Y5D2|A0A2R8Y5D2_HUMAN;A0A2R8Y586|A0A2R8Y586_HUMAN;A0A2R8Y755|A0A2R8Y755_HUMAN;A0A2R8YDI8|A0A2R8YDI8_HUMAN;A0A2R8YFV6|A0A2R8YFV6_HUMAN	14	14	550.07	0.455868	0.119577	6.27714	0.165436	Competition	Control	Q9Y3Z3	576358	457926	608684	389892	562584	936679	983306	219973	642590	1.87164e+07	1.24357e+06	365769	757970	233043	684976	658143	709203	488869	466769	582934	464360	514048	528217	1.62428e+06	1.21619e+06	450223	1.05253e+06	5.89789e+07	1.94338e+06	949835	675982	447701	684976	1.1117e+06	741578	926794
B3KQ25|B3KQ25_HUMAN;K7ENH2|K7ENH2_HUMAN;A0A087WTV2|A0A087WTV2_HUMAN;K7EKR3|K7EKR3_HUMAN	2	2	110.6	0.457981	0.120001	5.38698	0.164661	Competition	Control	B3KQ25	48192.6	26396.1	23428.4	15001.8	24029	8615.32	172426	52486.7	189204	25851.7	331810	12908.2	109217	78920.3	80792	0	60450.3	24520.5	39029.2	33601.9	17873.4	19778.9	22561.1	14939.7	213263	107425	309905	81463.5	518533	33520.3	97403.4	151615	80792	0	63209.9	46485.7
A0A1W2PPH1|A0A1W2PPH1_HUMAN	2	1	97.1	0.460172	0.120444	8.95674	0.163862	Competition	Control	A0A1W2PPH1	2471.06	0	28768.4	1048.03	3047.8	0	20128.4	228319	39724.2	0	15335.4	12981.8	8679.87	0	8607.95	21333.8	10700.8	2299.57	2001.21	0	21947.2	1381.76	2861.62	0	24895.6	467304	65066.1	0	23965.4	33711.3	7740.99	0	8607.95	36035.8	11189.3	4359.5
P62906|RL10A_HUMAN	6	6	293.74	0.465826	0.121791	3.23935	0.161822	Competition	Control	P62906	321206	202012	359037	314629	633227	234780	933230	47092.9	1.56163e+06	393475	2.03006e+06	1.72341e+06	937842	571953	462770	40997.3	480813	560084	260132	257158	273906	414818	594545	407127	1.15425e+06	96385.7	2.55787e+06	1.23991e+06	3.17247e+06	4.47539e+06	836397	1.09878e+06	462770	69250.2	502762	1.0618e+06
O94826|TOM70_HUMAN	3	3	82.74	0.467581	0.122061	1.35172	0.161196	Competition	Probe	O94826	115845	109046	128331	84817.3	89568.5	60129.3	62101.6	60534.9	184928	131575	101270	141026	80917	116996	103647	40625.3	76237.3	85701	93818.1	138814	97903.1	111826	84097	104269	76809.7	123898	302901	414617	158259	366218	72164.4	224762	103647	68621.7	79717.5	162471
Q5BJH7|YIF1B_HUMAN	1	1	56.94	0.467873	0.122061	4.50717	0.161092	Competition	Control	Q5BJH7	2039.68	2.869	1815.7	3257.32	935.612	26328.5	2847.1	2023.4	6184.37	118378	8950.69	16571.5	4590.72	16513	8841.52	0	2410.73	85572.6	1651.85	3.65219	1385.19	4294.57	878.459	45655.8	3521.4	4141.32	10129.7	373031	13987.6	43033.1	4094.16	31723.3	8841.52	0	2520.78	162228
Q86V85|GP180_HUMAN	1	1	78.15	0.471794	0.12295	1.45583	0.159703	Competition	Control	Q86V85	86385.3	80830	9922.03	127063	51015.7	27163.8	49454.3	72958.7	39085	81352.1	53337.1	260492	83203.6	59414.4	77164.4	77118.8	70711.4	69618.4	69959.9	102896	7569.44	167524	47899.3	47104.3	61167	149326	64019.1	256355	83352.2	676451	74203.7	114142	77164.4	130264	73939.3	131982
E9PLL6|E9PLL6_HUMAN;E9PJD9|E9PJD9_HUMAN;E9PLX7|E9PLX7_HUMAN	4	4	158.71	0.47329	0.123207	1.24358	0.159178	Probe	Competition	E9PLL6	1.33839e+06	1.51071e+06	1.57063e+06	1.88912e+06	1.94663e+06	2.3707e+06	1.66511e+06	204070	1.82014e+06	1.92777e+06	2.11142e+06	2.1025e+06	2.132e+06	3.02535e+06	2.33629e+06	1.55027e+06	1.71284e+06	1.46894e+06	1.08391e+06	1.92311e+06	1.19822e+06	2.49069e+06	1.82772e+06	4.11099e+06	2.05947e+06	417674	2.98129e+06	6.07476e+06	3.29961e+06	5.4598e+06	1.90139e+06	5.81203e+06	2.33629e+06	2.61862e+06	1.79104e+06	2.7848e+06
Q9NX40|OCAD1_HUMAN;D6R918|D6R918_HUMAN;D6RBN5|D6RBN5_HUMAN	2	1	70.45	0.474212	0.123313	3.65434	0.158855	Competition	Control	Q9NX40	5657.11	241542	8189.54	16533.1	3006.31	340.364	183248	7885.48	258.53	131936	491002	191592	49986.2	1787.73	38494.1	4566.62	9280.48	344701	4581.46	307479	6247.73	21797.8	2822.66	590.219	226649	16139.3	423.457	415753	767310	497530	44579.3	3434.43	38494.1	7713.66	9704.13	653482
P31937|3HIDH_HUMAN	1	1	35.11	0.475769	0.123585	6.90238	0.158311	Competition	Control	P31937	5525.99	5899.09	5595.69	0	0	5253.79	0	4882.44	5170.32	0	136795	6899.79	0	0	0	4763.99	22717.2	0	4475.28	7509.46	4268.91	0	0	9110.51	0	9992.97	8468.7	0	213775	17917.5	0	0	0	8047.03	23754.2	0
P19022|CADH2_HUMAN	2	2	112.89	0.480472	0.124672	2.41308	0.156683	Competition	Probe	P19022	32669.8	10750.6	32896.5	2370.51	7494.4	11.7439	11057.9	7287.72	106310	23564.4	2320.7	10082.1	23514	8.06075	29753.9	363.186	7466.63	5457.75	26457.9	13685.3	25096.5	3125.37	7036.59	20.3649	13676.9	14915.9	174130	74255.6	3626.66	26181.5	20970.5	15.4856	29753.9	613.471	7807.49	10346.8
P55809|SCOT1_HUMAN;E9PDW2|E9PDW2_HUMAN	9	9	467.84	0.481549	0.124816	12.2952	0.156313	Control	Probe	P55809	4.62336e+06	3.79307e+06	104951	69642.1	58524.1	37784.6	91012.4	110962	85182	294121	142220	255810	71091	110083	75266.4	305799	82160.4	62164.9	3.74427e+06	4.82852e+06	80066.1	91818.7	54949.1	65521.7	112568	227107	139523	926830	222253	664292	63401.3	211482	75266.4	516536	85911.1	117852
P09960|LKHA4_HUMAN;B4DEH5|B4DEH5_HUMAN	2	2	86.62	0.489495	0.126629	3.04872	0.153615	Probe	Control	P09960	1714.55	7699.69	29987.9	3968.29	3747.42	3416.57	14769.6	82.7714	3398.55	30005.6	31620	40815.5	3504.55	78074.2	9221.5	9008.1	22251.7	32005.6	1388.55	9801.6	22877.6	5231.94	3518.51	5924.61	18267.6	169.41	5566.64	94553.2	49414	105990	3125.47	149989	9221.5	15215.9	23267.5	60676
K7ERC8|K7ERC8_HUMAN	2	2	81.61	0.489595	0.126629	3.02094	0.153582	Competition	Control	K7ERC8	11131.1	9021.35	25165.7	45170.6	10651.5	28866	62660.4	2668.6	20947.6	121147	59193.6	126125	32135.1	13933.7	26361.4	6700.36	45528.5	89315.4	9014.62	11484.1	19198.7	59554.6	10000.9	50056.1	77500.8	5461.88	34311.1	381755	92504.4	327524	28659.2	26768.1	26361.4	11317.8	47606.9	169323
P62072|TIM10_HUMAN	2	2	65.05	0.492239	0.127176	1.79552	0.152697	Competition	Probe	P62072	24501.8	10557.1	44594	34233	36156.4	19638.7	19263.1	47113.8	10669.7	72498.2	32242.5	109253	16965.1	13962.6	26212.1	51300.8	15799.3	37852.8	19843	13439	34020.4	45134	33947.7	34055.1	23825.3	96428.6	17476.4	228455	50386.7	283711	15130	26823.6	26212.1	86654.1	16520.5	71761.1
Q92896|GSLG1_HUMAN;H3BM42|H3BM42_HUMAN;H3BQT1|H3BQT1_HUMAN;H3BQU9|H3BQU9_HUMAN	20	20	1037.33	0.495726	0.12794	1.8194	0.15154	Competition	Control	Q92896	793231	572138	878935	681260	747650	1.21918e+06	871794	369217	2.19071e+06	3.46463e+06	798849	1.20603e+06	1.29348e+06	1.97226e+06	952728	767357	674327	708779	642405	728323	670533	898198	701979	2.11415e+06	1.07827e+06	755682	3.58827e+06	1.09177e+07	1.2484e+06	3.13183e+06	1.15357e+06	3.78893e+06	952728	1.29617e+06	705110	1.3437e+06
A0A087WY00|A0A087WY00_HUMAN	1	1	35.69	0.496811	0.128082	2.6854	0.151182	Control	Probe	A0A087WY00	72435.3	410805	63946.1	19344.7	24353.6	651830	160952	58019.9	97322.3	39471.4	61580	294892	40157.2	260819	27817.3	9795.85	44679.8	79497.4	58662.4	522949	48784	25504.8	22865.9	1.13033e+06	199072	118750	159409	124381	96233.8	765780	35813.5	501062	27817.3	16546.6	46719.5	150711
Q9BRR6|ADPGK_HUMAN	1	1	72.98	0.501623	0.129184	139.705	0.149606	Competition	Probe	Q9BRR6	2903.44	11509.1	1358.65	23268.3	0	580705	829.997	0	40525.8	747729	77435	986933	7397.68	935.196	0	2643.27	2047.17	243.563	2351.37	14650.9	1036.5	30677.8	0	1.00699e+06	1026.57	0	66379	2.35623e+06	121011	2.56289e+06	6597.49	1796.61	0	4464.85	2140.62	461.745
[truncated: 212 more rows]
