# Supplementary material for: Harnessing affinity-based protein profiling to reveal a novel target of nintedanib
Source: Royal Society of Chemistry journal article supplement (doi:10.1039/d1cc00354b), 2021-01-01
Supplement: d1cc00354b2.xlsx [file d1cc00354b2.xlsx]

## Sheet: Probe vs Control
Supplementary Excel S2: Results of Potential Targets by Statistical Analysis (Probe/Control)
Total proteins count:301
Accession	Peptide count	Unique peptides	Confidence score	Anova (p)	q Value	Max fold change	Power	Highest mean condition	Lowest mean condition	Probe/Control	Protein names	Gene name
Q8WYP5|ELYS_HUMAN	1	1	28.56	0.0158542	0.0297299	739.078	0.743277	Probe	Control	Q8WYP5	Protein ELYS (Embryonic large molecule derived from yolk sac) (Protein MEL-28) (Putative AT-hook-containing transcription factor 1)	AHCTF1
H7C0V9|H7C0V9_HUMAN	1	1	65.86	0.000845699	0.00306427	55.2147	0.987803	Probe	Control	H7C0V9	Amyloid-beta precursor protein (Fragment)	APP
A0A286YFF7|A0A286YFF7_HUMAN;A0A286YFE3|A0A286YFE3_HUMAN;E9PIA8|E9PIA8_HUMAN;E9PK48|E9PK48_HUMAN;E9PSE5|E9PSE5_HUMAN	6	5	374.21	3.65736e-09	7.37691e-07	37.9403	1	Probe	Control	A0A286YFF7	Palmitoyl-protein thioesterase 1	PPT1
O60262|GBG7_HUMAN	1	0	55.88	0.021153	0.0364664	37.6941	0.69259	Probe	Control	O60262	Guanine nucleotide-binding protein G(I)/G(S)/G(O) subunit gamma-7	GNG7
P37837|TALDO_HUMAN;F2Z393|F2Z393_HUMAN	3	3	118.51	0.011025	0.0227686	36.42	0.800482	Probe	Control	P37837	Transaldolase (EC 2.2.1.2)	TALDO1
P34810|CD68_HUMAN	1	1	83.75	0.0454067	0.0652629	29.402	0.541278	Probe	Control	P34810	Macrosialin (Gp110) (CD antigen CD68)	CD68
A0A286YFL6|A0A286YFL6_HUMAN	2	1	90.94	6.04703e-05	0.000451737	28.2533	0.999957	Probe	Control	A0A286YFL6	Palmitoyl-protein thioesterase 1 (Fragment)	PPT1
C9JIZ6|C9JIZ6_HUMAN;Q5BJH1|Q5BJH1_HUMAN;A0A0J9YXB8|A0A0J9YXB8_HUMAN	17	17	926.75	7.62039e-09	9.23428e-07	25.4169	1	Probe	Control	C9JIZ6	Prosaposin	PSAP
Q8N6L1|KTAP2_HUMAN	1	1	70.69	0.0387693	0.0568023	23.6478	0.574081	Probe	Control	Q8N6L1	Keratinocyte-associated protein 2 (KCP-2) (Dolichyl-diphosphooligosaccharide--protein glycosyltransferase subunit KCP2) (Oligosaccharyl transferase subunit KCP2)	KRTCAP2
A0A1B0GVD5|A0A1B0GVD5_HUMAN;A0A1B0GVP3|A0A1B0GVP3_HUMAN;A0A1B0GV23|A0A1B0GV23_HUMAN;A0A1B0GU03|A0A1B0GU03_HUMAN;H7C469|H7C469_HUMAN;C9JH19|C9JH19_HUMAN;F8WD96|F8WD96_HUMAN;H7C1V0|H7C1V0_HUMAN;F8W787|F8W787_HUMAN;A0A1B0GV01|A0A1B0GV01_HUMAN;A0A1B0GVF1|A0A1B0GVF1_HUMAN	16	16	1274.87	6.68148e-10	4.04297e-07	23.2973	1	Probe	Control	A0A1B0GVD5	Cathepsin D	CTSD
F8VNT9|F8VNT9_HUMAN	1	1	49.38	0.000411957	0.00171914	22.6617	0.99631	Probe	Control	F8VNT9	CD63 antigen (Fragment)	CD63
A0A0A0MTI1|A0A0A0MTI1_HUMAN;H7C4B7|H7C4B7_HUMAN	2	2	107.15	4.96473e-05	0.000380274	19.6693	0.999976	Probe	Control	A0A0A0MTI1	Delta(24)-sterol reductase	DHCR24
O15118|NPC1_HUMAN;K7EQ23|K7EQ23_HUMAN	3	3	121.99	0.000153971	0.000870727	16.5489	0.999514	Probe	Control	O15118	NPC intracellular cholesterol transporter 1 (Niemann-Pick C1 protein)	NPC1
P07858|CATB_HUMAN;R4GMQ5|R4GMQ5_HUMAN;E9PCB3|E9PCB3_HUMAN	5	5	356.13	2.37663e-09	7.19051e-07	16.4515	1	Probe	Control	P07858	Cathepsin B (EC 3.4.22.1) (APP secretase) (APPS) (Cathepsin B1) [Cleaved into: Cathepsin B light chain; Cathepsin B heavy chain]	CTSB
Q9C0H2|TTYH3_HUMAN	1	1	76.67	0.0476746	0.0680376	15.8545	0.531062	Probe	Control	Q9C0H2	Protein tweety homolog 3 (hTTY3)	TTYH3
K7ENW5|K7ENW5_HUMAN	1	1	48.88	0.0495257	0.0700188	14.9381	0.523051	Probe	Control	K7ENW5	Thymidine kinase (EC 2.7.1.21)	TK1
P17813|EGLN_HUMAN;F5GX88|F5GX88_HUMAN	4	4	212.84	8.7767e-06	0.000104133	14.8752	1	Probe	Control	P17813	Endoglin (CD antigen CD105)	ENG
Q8WWI5|CTL1_HUMAN	1	1	41.05	0.0292696	0.0456471	14.8004	0.630762	Probe	Control	Q8WWI5	Choline transporter-like protein 1 (CDw92) (Solute carrier family 44 member 1) (CD antigen CD92)	SLC44A1
Q5URX0|Q5URX0_HUMAN;H0YA83|H0YA83_HUMAN;H0Y9B6|H0Y9B6_HUMAN	3	3	101.99	3.24401e-05	0.000280422	14.2891	0.999994	Probe	Control	Q5URX0	Beta-hexosaminidase subunit beta (ENC-1AS) (Epididymis luminal protein 248) (Epididymis secretory protein Li 111)	HEXB
X6RJP6|X6RJP6_HUMAN	6	6	248.67	2.2678e-05	0.00022133	13.6425	0.999998	Probe	Control	X6RJP6	Transgelin-2 (Fragment)	TAGLN2
O15269|SPTC1_HUMAN	2	2	77.35	0.00184221	0.00583624	12.3565	0.964616	Probe	Control	O15269	Serine palmitoyltransferase 1 (EC 2.3.1.50) (Long chain base biosynthesis protein 1) (LCB 1) (Serine-palmitoyl-CoA transferase 1) (SPT 1) (SPT1)	SPTLC1
Q10589|BST2_HUMAN	3	3	250.52	0.000192378	0.000985904	10.6123	0.999197	Probe	Control	Q10589	Bone marrow stromal antigen 2 (BST-2) (HM1.24 antigen) (Tetherin) (CD antigen CD317)	BST2
E9PS44|E9PS44_HUMAN;E9PQN9|E9PQN9_HUMAN	4	4	398.65	0.000103899	0.000641525	10.5822	0.999813	Probe	Control	E9PS44	Interferon-induced transmembrane protein 3	IFITM3
A0A3B3IRI2|A0A3B3IRI2_HUMAN;A0A3B3IRQ8|A0A3B3IRQ8_HUMAN;A0A3B3ISY3|A0A3B3ISY3_HUMAN	3	2	124.2	0.00189074	0.00595879	10.4787	0.96347	Probe	Control	A0A3B3IRI2	CTP synthase (EC 6.3.4.2) (UTP--ammonia ligase)	CTPS1
D6RB85|D6RB85_HUMAN	6	1	257.09	0.000447694	0.00181812	9.54627	0.995714	Probe	Control	D6RB85	Calnexin (Fragment)	CANX
Q9NRX5|SERC1_HUMAN	2	2	131.29	0.00175088	0.00563544	9.3553	0.966777	Probe	Control	Q9NRX5	Serine incorporator 1 (Tumor differentially expressed protein 1-like) (Tumor differentially expressed protein 2)	SERINC1
Q09160|1A80_HUMAN	7	0	559.22	1.30744e-06	3.03162e-05	9.3495	1	Probe	Control	Q09160	HLA class I histocompatibility antigen, A-80 alpha chain (Aw-80) (HLA class I histocompatibility antigen, A-1 alpha chain) (MHC class I antigen A*80)	HLA-A
Q9Y277|VDAC3_HUMAN;E5RFP6|E5RFP6_HUMAN;E5RHE1|E5RHE1_HUMAN;E5RK27|E5RK27_HUMAN;E5RFL1|E5RFL1_HUMAN	7	6	277.52	0.000478839	0.00190623	9.32878	0.995173	Probe	Control	Q9Y277	Voltage-dependent anion-selective channel protein 3 (VDAC-3) (hVDAC3) (Outer mitochondrial membrane protein porin 3)	VDAC3
P33947|ERD22_HUMAN;O43731|ERD23_HUMAN	2	1	95.49	0.00807546	0.017769	9.18505	0.843037	Probe	Control	P33947	ER lumen protein-retaining receptor 2 (ERD2-like protein 1) (ELP-1) (KDEL endoplasmic reticulum protein retention receptor 2) (KDEL receptor 2)	KDELR2
P01893|HLAH_HUMAN	7	0	544.78	5.43532e-06	7.64865e-05	9.04167	1	Probe	Control	P01893	Putative HLA class I histocompatibility antigen, alpha chain H (HLA-12.4) (HLA-AR) (MHC class I antigen H)	HLA-H
X6R5C5|X6R5C5_HUMAN;Q5JZH0|Q5JZH0_HUMAN	4	4	221.12	7.63036e-09	9.23428e-07	8.92648	1	Probe	Control	X6R5C5	Carboxypeptidase (EC 3.4.16.-)	CTSA
K7EK43|K7EK43_HUMAN	1	0	60.11	0.0314194	0.0478889	8.66426	0.616709	Probe	Control	K7EK43	Tubulin beta-6 chain (Fragment)	TUBB6
M0QXU7|M0QXU7_HUMAN;M0QXM9|M0QXM9_HUMAN;M0R124|M0R124_HUMAN	3	3	154.08	0.0218508	0.0372448	8.625	0.686622	Probe	Control	M0QXU7	Mitochondrial import inner membrane translocase subunit TIM44 (Fragment)	TIMM44
B7Z7P8|B7Z7P8_HUMAN;I3L492|I3L492_HUMAN	2	1	76.01	0.0167809	0.0306405	8.38822	0.733641	Probe	Control	B7Z7P8	Eukaryotic peptide chain release factor subunit 1 (cDNA FLJ56175, highly similar to Eukaryotic peptide chain release factor subunit1)	ETF1
G5E994|G5E994_HUMAN;U3KQD2|U3KQD2_HUMAN	3	3	145.54	7.30285e-05	0.000503341	8.16243	0.999927	Probe	Control	G5E994	G protein-coupled receptor 107, isoform CRA_c (Protein GPR107)	GPR107
H3BN98|H3BN98_HUMAN;H3BPJ2|H3BPJ2_HUMAN	3	1	120.53	0.00121186	0.00411964	8.15191	0.979495	Probe	Control	H3BN98	Uncharacterized protein (Fragment)
A0A0A6YYA0|A0A0A6YYA0_HUMAN;G3V2Y2|G3V2Y2_HUMAN	5	5	224.91	0.00756948	0.0170271	8.01783	0.851105	Probe	Control	A0A0A6YYA0	Protein TMED7-TICAM2	TMED7-TICAM2
P36957|ODO2_HUMAN;H0YJF9|H0YJF9_HUMAN	2	2	100.3	0.00257907	0.00761266	7.87353	0.947444	Probe	Control	P36957	Dihydrolipoyllysine-residue succinyltransferase component of 2-oxoglutarate dehydrogenase complex, mitochondrial (EC 2.3.1.61) (2-oxoglutarate dehydrogenase complex component E2) (OGDC-E2) (Dihydrolipoamide succinyltransferase component of 2-oxoglutarate dehydrogenase complex) (E2K)	DLST
P21796|VDAC1_HUMAN;C9JI87|C9JI87_HUMAN	22	21	2429.62	4.54113e-05	0.000352287	7.82255	0.999982	Probe	Control	P21796	Voltage-dependent anion-selective channel protein 1 (VDAC-1) (hVDAC1) (Outer mitochondrial membrane protein porin 1) (Plasmalemmal porin) (Porin 31HL) (Porin 31HM)	VDAC1
P28300|LYOX_HUMAN	6	6	385.56	0.0107148	0.0223657	7.53484	0.804637	Probe	Control	P28300	Protein-lysine 6-oxidase (EC 1.4.3.13) (Lysyl oxidase)	LOX
Q6P2E9|EDC4_HUMAN	1	1	37.65	0.0159188	0.0297299	7.48695	0.742594	Probe	Control	Q6P2E9	Enhancer of mRNA-decapping protein 4 (Autoantigen Ge-1) (Autoantigen RCD-8) (Human enhancer of decapping large subunit) (Hedls)	EDC4
C9J7K9|C9J7K9_HUMAN;C9J9P4|C9J9P4_HUMAN;C9J0H3|C9J0H3_HUMAN	4	3	150.98	1.47821e-06	3.03162e-05	7.48513	1	Probe	Control	C9J7K9	Phospholipid scramblase	PLSCR1
A0A140T921|A0A140T921_HUMAN;A2AEA2|A2AEA2_HUMAN;A0A1W2PRU9|A0A1W2PRU9_HUMAN;Q31612|1B73_HUMAN	11	0	759.19	4.79864e-06	7.08211e-05	7.3878	1	Probe	Control	A0A140T921	HLA class I histocompatibility antigen, Cw-6 alpha chain	HLA-C
Q9HC07|TM165_HUMAN;D6RBL0|D6RBL0_HUMAN;V9GY93|V9GY93_HUMAN	2	2	89.65	0.000101462	0.000632935	7.31756	0.999824	Probe	Control	Q9HC07	Transmembrane protein 165 (Transmembrane protein PT27) (Transmembrane protein TPARL)	TMEM165
P55884|EIF3B_HUMAN	1	1	52.72	0.0157442	0.0297299	7.29506	0.744446	Probe	Control	P55884	Eukaryotic translation initiation factor 3 subunit B (eIF3b) (Eukaryotic translation initiation factor 3 subunit 9) (Prt1 homolog) (hPrt1) (eIF-3-eta) (eIF3 p110) (eIF3 p116)	EIF3B
P06756|ITAV_HUMAN	1	1	77.03	0.00591953	0.0139374	7.28193	0.879315	Probe	Control	P06756	Integrin alpha-V (Vitronectin receptor) (Vitronectin receptor subunit alpha) (CD antigen CD51) [Cleaved into: Integrin alpha-V heavy chain; Integrin alpha-V light chain]	ITGAV
P54578|UBP14_HUMAN;A6NJA2|A6NJA2_HUMAN;J3KS55|J3KS55_HUMAN	3	3	120.87	0.0263956	0.0423661	7.02753	0.650919	Probe	Control	P54578	Ubiquitin carboxyl-terminal hydrolase 14 (EC 3.4.19.12) (Deubiquitinating enzyme 14) (Ubiquitin thioesterase 14) (Ubiquitin-specific-processing protease 14)	USP14
O96008|TOM40_HUMAN;K7EKG4|K7EKG4_HUMAN;K7EJ57|K7EJ57_HUMAN	3	3	137.05	0.00693738	0.0158408	7.02603	0.861552	Probe	Control	O96008	Mitochondrial import receptor subunit TOM40 homolog (Protein Haymaker) (Translocase of outer membrane 40 kDa subunit homolog) (p38.5)	TOMM40
B0UXQ0|B0UXQ0_HUMAN;A0A1W2PQS8|A0A1W2PQS8_HUMAN;A0A140T941|A0A140T941_HUMAN	13	0	1203.89	3.101e-07	1.84781e-05	7.02156	1	Probe	Control	B0UXQ0	HLA class I histocompatibility antigen, A-3 alpha chain (MHC class I antigen) (MHC class I protein)	HLA-A
A0A0A0MR02|A0A0A0MR02_HUMAN;Q5JSD1|Q5JSD1_HUMAN;A2A3S1|A2A3S1_HUMAN	14	14	1111.03	0.000193889	0.000985904	6.92619	0.999183	Probe	Control	A0A0A0MR02	Voltage-dependent anion-selective channel protein 2 (Fragment)	VDAC2
P02786|TFR1_HUMAN;G3V0E5|G3V0E5_HUMAN;H7C3V5|H7C3V5_HUMAN;F8WBE5|F8WBE5_HUMAN	8	8	376.48	2.23909e-05	0.00022133	6.87744	0.999998	Probe	Control	P02786	Transferrin receptor protein 1 (TR) (TfR) (TfR1) (Trfr) (T9) (p90) (CD antigen CD71) [Cleaved into: Transferrin receptor protein 1, serum form (sTfR)]	TFRC
A0A140T913|A0A140T913_HUMAN	10	0	822.88	7.36512e-07	2.2855e-05	6.84131	1	Probe	Control	A0A140T913	HLA class I histocompatibility antigen, A-3 alpha chain	HLA-A
P04083|ANXA1_HUMAN;Q5T3N1|Q5T3N1_HUMAN;Q5T3N0|Q5T3N0_HUMAN	15	14	1107.18	0.000274965	0.00129986	6.83316	0.998298	Probe	Control	P04083	Annexin A1 (Annexin I) (Annexin-1) (Calpactin II) (Calpactin-2) (Chromobindin-9) (Lipocortin I) (Phospholipase A2 inhibitory protein) (p35)	ANXA1
Q95604|1C17_HUMAN	10	0	819.02	3.8244e-07	1.84781e-05	6.81719	1	Probe	Control	Q95604	HLA class I histocompatibility antigen, Cw-17 alpha chain (MHC class I antigen Cw*17)	HLA-C
P16189|1A31_HUMAN;P16190|1A33_HUMAN;P30453|1A34_HUMAN;P10314|1A32_HUMAN;P30457|1A66_HUMAN;A0A140T8Y4|A0A140T8Y4_HUMAN;A0A0G2JPD3|A0A0G2JPD3_HUMAN;A0A140T975|A0A140T975_HUMAN;A0A140T8W8|A0A140T8W8_HUMAN;P01891|1A68_HUMAN	16	2	1393.56	2.57525e-07	1.84781e-05	6.75369	1	Probe	Control	P16189	HLA class I histocompatibility antigen, A-31 alpha chain (MHC class I antigen A*31)	HLA-A
Q04826|1B40_HUMAN	8	0	702.98	0.000109177	0.000667302	6.70635	0.999789	Probe	Control	Q04826	HLA class I histocompatibility antigen, B-40 alpha chain (Bw-60) (MHC class I antigen B*40)	HLA-B
A0AVL1|A0AVL1_HUMAN	4	4	171.27	0.000166652	0.000923042	6.42471	0.999417	Probe	Control	A0AVL1	ADAM9 protein (Disintegrin and metalloproteinase domain-containing protein 9)	ADAM9
O00264|PGRC1_HUMAN	3	2	160.98	0.0271796	0.0430535	6.39857	0.645253	Probe	Control	O00264	Membrane-associated progesterone receptor component 1 (mPR) (Dap1) (IZA)	PGRMC1
P30508|1C12_HUMAN;Q07000|1C15_HUMAN;A0A140T912|A0A140T912_HUMAN;A0A140T9J9|A0A140T9J9_HUMAN;P30510|1C14_HUMAN;A0A140T930|A0A140T930_HUMAN;A0A140T962|A0A140T962_HUMAN;A0A1W2PRX1|A0A1W2PRX1_HUMAN;P30504|1C04_HUMAN;P30505|1C08_HUMAN;Q29865|1C18_HUMAN;A0A0G2JH50|A0A0G2JH50_HUMAN;A0A1W2PP77|A0A1W2PP77_HUMAN;Q29960|1C16_HUMAN;A0A0G2JIF0|A0A0G2JIF0_HUMAN;A0A1W2PS56|A0A1W2PS56_HUMAN;P30501|1C02_HUMAN;A0A…	14	0	1210.64	3.96365e-07	1.84781e-05	6.38004	1	Probe	Control	P30508	HLA class I histocompatibility antigen, Cw-12 alpha chain (MHC class I antigen Cw*12)	HLA-C
P07711|CATL1_HUMAN	1	1	43.36	0.000158218	0.000886464	6.36762	0.999483	Probe	Control	P07711	Cathepsin L1 (EC 3.4.22.15) (Cathepsin L) (Major excreted protein) (MEP) [Cleaved into: Cathepsin L1 heavy chain; Cathepsin L1 light chain]	CTSL
P28288|ABCD3_HUMAN	1	1	48.5	0.0294725	0.0457278	6.34006	0.6294	Probe	Control	P28288	ATP-binding cassette sub-family D member 3 (70 kDa peroxisomal membrane protein) (PMP70)	ABCD3
P42785|PCP_HUMAN;E9PIG4|E9PIG4_HUMAN;E9PKN6|E9PKN6_HUMAN;E9PL49|E9PL49_HUMAN;E9PR42|E9PR42_HUMAN	5	5	245.23	7.24642e-05	0.000503341	6.3398	0.999929	Probe	Control	P42785	Lysosomal Pro-X carboxypeptidase (EC 3.4.16.2) (Angiotensinase C) (Lysosomal carboxypeptidase C) (Proline carboxypeptidase) (Prolylcarboxypeptidase) (PRCP)	PRCP
Q6NUK1|SCMC1_HUMAN	2	2	71.43	0.000872706	0.00314331	6.31684	0.987212	Probe	Control	Q6NUK1	Calcium-binding mitochondrial carrier protein SCaMC-1 (Mitochondrial ATP-Mg/Pi carrier protein 1) (Mitochondrial Ca(2+)-dependent solute carrier protein 1) (Small calcium-binding mitochondrial carrier protein 1) (Solute carrier family 25 member 24)	SLC25A24
P16188|1A30_HUMAN	13	0	1300.09	7.52412e-07	2.2855e-05	6.30607	1	Probe	Control	P16188	HLA class I histocompatibility antigen, A-30 alpha chain (MHC class I antigen A*30)	HLA-A
P30460|1B08_HUMAN;A0A140T951|A0A140T951_HUMAN;A0A1W2PPR8|A0A1W2PPR8_HUMAN;A0A140T9D4|A0A140T9D4_HUMAN;P30486|1B48_HUMAN	8	0	674.55	7.81918e-05	0.000508752	6.28088	0.999912	Probe	Control	P30460	HLA class I histocompatibility antigen, B-8 alpha chain (MHC class I antigen B*8)	HLA-B
P17302|CXA1_HUMAN	2	2	60.91	0.000407676	0.00171914	6.27713	0.996379	Probe	Control	P17302	Gap junction alpha-1 protein (Connexin-43) (Cx43) (Gap junction 43 kDa heart protein)	GJA1
P60602|ROMO1_HUMAN	1	1	64.23	0.0254556	0.0412955	6.25844	0.65789	Probe	Control	P60602	Reactive oxygen species modulator 1 (ROS modulator 1) (Epididymis tissue protein Li 175) (Glyrichin) (Mitochondrial targeting GxxxG motif protein) (MTGM) (Protein MGR2 homolog)	ROMO1
A0A286YFD6|A0A286YFD6_HUMAN;C9JXC1|C9JXC1_HUMAN	2	2	64.04	0.0196977	0.0347497	6.21614	0.705519	Probe	Control	A0A286YFD6	Ribonucleoside-diphosphate reductase subunit M2	RRM2
H0Y2P0|H0Y2P0_HUMAN;H0YE40|H0YE40_HUMAN;E9PKC6|E9PKC6_HUMAN;J3KN83|J3KN83_HUMAN	4	4	210.44	0.000430781	0.00177324	6.1678	0.995999	Probe	Control	H0Y2P0	CD44 antigen (Fragment)	CD44
Q9UBR2|CATZ_HUMAN	3	3	175.44	0.000278536	0.00130653	6.10638	0.998253	Probe	Control	Q9UBR2	Cathepsin Z (EC 3.4.18.1) (Cathepsin P) (Cathepsin X)	CTSZ
Q7KZF4|SND1_HUMAN;H7C597|H7C597_HUMAN	5	4	190.19	0.0488816	0.0694326	6.05538	0.525807	Probe	Control	Q7KZF4	Staphylococcal nuclease domain-containing protein 1 (EC 3.1.31.1) (100 kDa coactivator) (EBNA2 coactivator p100) (Tudor domain-containing protein 11) (p100 co-activator)	SND1
A0A3B3ISF9|A0A3B3ISF9_HUMAN;B4DKB2|B4DKB2_HUMAN;E9PHZ1|E9PHZ1_HUMAN;E9PJG1|E9PJG1_HUMAN	18	17	1086.86	2.82001e-05	0.000258544	6.01797	0.999996	Probe	Control	A0A3B3ISF9	Endothelin-converting enzyme 1	ECE1
P30492|1B54_HUMAN;P30493|1B55_HUMAN;P18463|1B37_HUMAN;P30462|1B14_HUMAN;A0A140T9S9|A0A140T9S9_HUMAN;A0A140TA02|A0A140TA02_HUMAN	10	0	927.97	1.64072e-06	3.20258e-05	6.01524	1	Probe	Control	P30492	HLA class I histocompatibility antigen, B-54 alpha chain (Bw-22) (Bw-54) (MHC class I antigen B*54)	HLA-B
A0A0A0MSG2|A0A0A0MSG2_HUMAN	4	3	148.13	0.027951	0.0439303	6.00745	0.639804	Probe	Control	A0A0A0MSG2	Four and a half LIM domains protein 2	FHL2
H3BMH2|H3BMH2_HUMAN;B4DQU5|B4DQU5_HUMAN	5	5	192.56	5.41777e-05	0.000409787	5.96413	0.999969	Probe	Control	H3BMH2	Ras-related protein Rab-11A (Fragment)	RAB11A
P18464|1B51_HUMAN	9	0	876.51	1.46186e-06	3.03162e-05	5.8381	1	Probe	Control	P18464	HLA class I histocompatibility antigen, B-51 alpha chain (MHC class I antigen B*51)	HLA-B
Q06481|APLP2_HUMAN	2	2	70.02	0.000703896	0.00258138	5.83662	0.990823	Probe	Control	Q06481	Amyloid-like protein 2 (APLP-2) (APPH) (Amyloid protein homolog) (CDEI box-binding protein) (CDEBP)	APLP2
P10319|1B58_HUMAN;P18465|1B57_HUMAN;P30487|1B49_HUMAN;A0A140T9G0|A0A140T9G0_HUMAN;P03989|1B27_HUMAN;P30475|1B39_HUMAN;P30483|1B45_HUMAN;A0A140T953|A0A140T953_HUMAN;P30485|1B47_HUMAN;P30461|1B13_HUMAN;A0A140T997|A0A140T997_HUMAN	11	0	1055.33	1.50303e-06	3.03162e-05	5.81269	1	Probe	Control	P10319	HLA class I histocompatibility antigen, B-58 alpha chain (Bw-58) (MHC class I antigen B*58)	HLA-B
A0A3B3IUB5|A0A3B3IUB5_HUMAN;A0A075B6F6|A0A075B6F6_HUMAN;A0A0C4DGU3|A0A0C4DGU3_HUMAN	4	3	172.55	0.000187795	0.000979615	5.80196	0.999238	Probe	Control	A0A3B3IUB5	Minor histocompatibility antigen H13	HM13
O60664|PLIN3_HUMAN;K7ERZ3|K7ERZ3_HUMAN;K7EL96|K7EL96_HUMAN;K7ER39|K7ER39_HUMAN	6	6	205.61	8.10853e-05	0.000521966	5.68787	0.999903	Probe	Control	O60664	Perilipin-3 (47 kDa mannose 6-phosphate receptor-binding protein) (47 kDa MPR-binding protein) (Cargo selection protein TIP47) (Mannose-6-phosphate receptor-binding protein 1) (Placental protein 17) (PP17)	PLIN3
Q01518|CAP1_HUMAN;Q5T0R1|Q5T0R1_HUMAN	6	6	334.31	0.00112279	0.00388229	5.6797	0.98156	Probe	Control	Q01518	Adenylyl cyclase-associated protein 1 (CAP 1)	CAP1
Q5SRN5|Q5SRN5_HUMAN;A0A1W2PS24|A0A1W2PS24_HUMAN;Q5SRN7|Q5SRN7_HUMAN;P13746|1A11_HUMAN;A0A0G2JIF2|A0A0G2JIF2_HUMAN;A0A0G2JL56|A0A0G2JL56_HUMAN;A0A0G2JI36|A0A0G2JI36_HUMAN;P05534|1A24_HUMAN;P30447|1A23_HUMAN;A0A0G2JPQ3|A0A0G2JPQ3_HUMAN;A0A0G2JNV5|A0A0G2JNV5_HUMAN;A0A0G2JNX1|A0A0G2JNX1_HUMAN;A0A1W2PP29|A0A1W2PP29_HUMAN	16	3	1592.94	8.68723e-07	2.2855e-05	5.60746	1	Probe	Control	Q5SRN5	HLA class I histocompatibility antigen, A-3 alpha chain	HLA-A
H0YDJ9|H0YDJ9_HUMAN	2	2	106.85	1.42034e-06	3.03162e-05	5.5738	1	Probe	Control	H0YDJ9	Tetraspanin (Fragment)	CD81
O14929|HAT1_HUMAN	2	2	135.55	0.0432649	0.0627809	5.55842	0.551364	Probe	Control	O14929	Histone acetyltransferase type B catalytic subunit (EC 2.3.1.48) (Histone acetyltransferase 1)	HAT1
Q9UHG3|PCYOX_HUMAN;F8W8W4|F8W8W4_HUMAN;C9K055|C9K055_HUMAN;C9JGT6|C9JGT6_HUMAN	7	7	424.95	5.46567e-07	2.2855e-05	5.42528	1	Probe	Control	Q9UHG3	Prenylcysteine oxidase 1 (EC 1.8.3.5) (Prenylcysteine lyase)	PCYOX1
P20618|PSB1_HUMAN	4	4	170.44	0.0243841	0.039986	5.37942	0.666087	Probe	Control	P20618	Proteasome subunit beta type-1 (EC 3.4.25.1) (Macropain subunit C5) (Multicatalytic endopeptidase complex subunit C5) (Proteasome component C5) (Proteasome gamma chain)	PSMB1
A0A2R8YGD1|A0A2R8YGD1_HUMAN;A0A2R8Y7U1|A0A2R8Y7U1_HUMAN;A0A2R8YD45|A0A2R8YD45_HUMAN;A0A2R8Y7I4|A0A2R8Y7I4_HUMAN;A0A2R8YD72|A0A2R8YD72_HUMAN;A0A2R8YDY1|A0A2R8YDY1_HUMAN	5	5	299.47	0.000170123	0.0009274	5.36502	0.99939	Probe	Control	A0A2R8YGD1	Tripeptidyl-peptidase 1	TPP1
A6NP52|A6NP52_HUMAN	2	2	90.34	0.000124211	0.000746138	5.30839	0.999709	Probe	Control	A6NP52	PRA1 family protein	PRAF2
P49721|PSB2_HUMAN;A0A087WVV1|A0A087WVV1_HUMAN	6	5	203.74	8.20814e-07	2.2855e-05	5.2926	1	Probe	Control	P49721	Proteasome subunit beta type-2 (EC 3.4.25.1) (Macropain subunit C7-I) (Multicatalytic endopeptidase complex subunit C7-I) (Proteasome component C7-I)	PSMB2
O15427|MOT4_HUMAN	2	2	162.39	0.000424723	0.00176028	5.09574	0.9961	Probe	Control	O15427	Monocarboxylate transporter 4 (MCT 4) (Solute carrier family 16 member 3)	SLC16A3
E9PC52|E9PC52_HUMAN;Q5JP01|Q5JP01_HUMAN;H0YCT5|H0YCT5_HUMAN;Q5JNZ6|Q5JNZ6_HUMAN	4	3	112.75	0.00966207	0.0207324	5.02489	0.819269	Probe	Control	E9PC52	Histone-binding protein RBBP7	RBBP7
P30519|HMOX2_HUMAN;A0A087WT44|A0A087WT44_HUMAN;I3L159|I3L159_HUMAN;A0A1B0GXH0|A0A1B0GXH0_HUMAN	4	4	246.6	0.0267767	0.0428641	5.0235	0.648148	Probe	Control	P30519	Heme oxygenase 2 (HO-2) (EC 1.14.14.18)	HMOX2
A0A140T9M0|A0A140T9M0_HUMAN;A0A140T9U0|A0A140T9U0_HUMAN;A0A1W2PNZ7|A0A1W2PNZ7_HUMAN;A0A140T9T1|A0A140T9T1_HUMAN	9	0	743.55	4.3542e-05	0.000342173	4.96755	0.999984	Probe	Control	A0A140T9M0	HLA class I histocompatibility antigen, Cw-6 alpha chain	HLA-C
R4GN98|R4GN98_HUMAN	1	1	79.52	7.10178e-05	0.000503341	4.72853	0.999932	Probe	Control	R4GN98	Protein S100 (S100 calcium-binding protein) (Fragment)	S100A6
Q00765|REEP5_HUMAN;B7Z332|B7Z332_HUMAN	2	2	102.52	1.08647e-05	0.000121745	4.59756	1	Probe	Control	Q00765	Receptor expression-enhancing protein 5 (Polyposis locus protein 1) (Protein TB2)	REEP5
Q92973|TNPO1_HUMAN;S4R398|S4R398_HUMAN;E7EW37|E7EW37_HUMAN;O14787|TNPO2_HUMAN	5	5	250.84	0.000313494	0.00143709	4.586	0.997793	Probe	Control	Q92973	Transportin-1 (Importin beta-2) (Karyopherin beta-2) (M9 region interaction protein) (MIP)	TNPO1
Q9P035|HACD3_HUMAN;H3BMZ1|H3BMZ1_HUMAN;H3BPZ1|H3BPZ1_HUMAN	2	2	145.06	0.00557076	0.0135376	4.58405	0.88569	Probe	Control	Q9P035	Very-long-chain (3R)-3-hydroxyacyl-CoA dehydratase 3 (EC 4.2.1.134) (3-hydroxyacyl-CoA dehydratase 3) (HACD3) (Butyrate-induced protein 1) (B-ind1) (hB-ind1) (Protein-tyrosine phosphatase-like A domain-containing protein 1)	HACD3
P48047|ATPO_HUMAN;A0A494C0K9|A0A494C0K9_HUMAN;H7C068|H7C068_HUMAN;H7C086|H7C086_HUMAN	5	5	259.3	0.000459154	0.001848	4.39589	0.995517	Probe	Control	P48047	ATP synthase subunit O, mitochondrial (ATP synthase peripheral stalk subunit OSCP) (Oligomycin sensitivity conferral protein) (OSCP)	ATP5PO
A0A0G2JLB3|A0A0G2JLB3_HUMAN	4	4	173.72	2.94657e-06	4.91497e-05	4.36267	1	Probe	Control	A0A0G2JLB3	Glucosylceramidase (EC 3.2.1.45)	GBA
P84095|RHOG_HUMAN	3	3	122.28	9.17447e-05	0.000578279	4.32056	0.999865	Probe	Control	P84095	Rho-related GTP-binding protein RhoG	RHOG
P16278|BGAL_HUMAN;E7EQ29|E7EQ29_HUMAN;C9J4G9|C9J4G9_HUMAN;C9J539|C9J539_HUMAN;C9JF15|C9JF15_HUMAN	6	6	232.1	1.00472e-05	0.000116915	4.30692	1	Probe	Control	P16278	Beta-galactosidase (EC 3.2.1.23) (Acid beta-galactosidase) (Lactase) (Elastin receptor 1)	GLB1
Q8IY34|S15A3_HUMAN;F5H1C8|F5H1C8_HUMAN;H0YFC1|H0YFC1_HUMAN	2	2	38	0.00499123	0.0124288	4.26132	0.896636	Probe	Control	Q8IY34	Solute carrier family 15 member 3 (Osteoclast transporter) (Peptide transporter 3) (Peptide/histidine transporter 2)	SLC15A3
P08758|ANXA5_HUMAN;D6RBE9|D6RBE9_HUMAN;D6RBL5|D6RBL5_HUMAN;E9PHT9|E9PHT9_HUMAN;D6RCN3|D6RCN3_HUMAN	10	10	838.45	3.93765e-05	0.000321984	4.24417	0.999988	Probe	Control	P08758	Annexin A5 (Anchorin CII) (Annexin V) (Annexin-5) (Calphobindin I) (CBP-I) (Endonexin II) (Lipocortin V) (Placental anticoagulant protein 4) (PP4) (Placental anticoagulant protein I) (PAP-I) (Thromboplastin inhibitor) (Vascular anticoagulant-alpha) (VAC-alpha)	ANXA5
P51572|BAP31_HUMAN;A0A2R8Y5M6|A0A2R8Y5M6_HUMAN;C9J0M4|C9J0M4_HUMAN	3	2	120.45	1.55125e-05	0.000161839	4.24167	1	Probe	Control	P51572	B-cell receptor-associated protein 31 (BCR-associated protein 31) (Bap31) (6C6-AG tumor-associated antigen) (Protein CDM) (p28)	BCAP31
Q92820|GGH_HUMAN	1	1	40.18	0.00477134	0.0119799	4.21694	0.900909	Probe	Control	Q92820	Gamma-glutamyl hydrolase (EC 3.4.19.9) (Conjugase) (GH) (Gamma-Glu-X carboxypeptidase)	GGH
A0A087X271|A0A087X271_HUMAN;K7ES69|K7ES69_HUMAN;A0A087X1X5|A0A087X1X5_HUMAN;H3BQH0|H3BQH0_HUMAN	5	4	206.3	7.17005e-05	0.000503341	4.15984	0.999931	Probe	Control	A0A087X271	Calponin (Fragment)	CNN2
G3V1C3|G3V1C3_HUMAN;E9PQK6|E9PQK6_HUMAN;H0YER7|H0YER7_HUMAN	3	3	120.66	0.025709	0.0414842	4.14793	0.655992	Probe	Control	G3V1C3	Apoptosis inhibitor 5	API5
C9JKL2|C9JKL2_HUMAN	1	1	56.81	0.00398643	0.0104424	4.08762	0.916733	Probe	Control	C9JKL2	STARD3 N-terminal-like protein	STARD3NL
Q04941|PLP2_HUMAN	2	1	94.77	0.000388611	0.00167723	4.07604	0.996684	Probe	Control	Q04941	Proteolipid protein 2 (Differentiation-dependent protein A4) (Intestinal membrane A4 protein)	PLP2
P78386|KRT85_HUMAN;F5GYI5|F5GYI5_HUMAN	8	1	289	0.00370637	0.0098962	3.97436	0.922602	Probe	Control	P78386	Keratin, type II cuticular Hb5 (Hair keratin K2.12) (Keratin-85) (K85) (Type II hair keratin Hb5) (Type-II keratin Kb25)	KRT85
K7EL20|K7EL20_HUMAN;K7EP16|K7EP16_HUMAN	2	2	65.32	0.0121056	0.0244988	3.8448	0.786513	Probe	Control	K7EL20	Eukaryotic translation initiation factor 3 subunit G (Fragment)	EIF3G
P31946|1433B_HUMAN;A0A0J9YWE8|A0A0J9YWE8_HUMAN;A0A0J9YWZ2|A0A0J9YWZ2_HUMAN	6	3	365.45	2.9974e-07	1.84781e-05	3.82001	1	Probe	Control	P31946	14-3-3 protein beta/alpha (Protein 1054) (Protein kinase C inhibitor protein 1) (KCIP-1) [Cleaved into: 14-3-3 protein beta/alpha, N-terminally processed]	YWHAB
P61981|1433G_HUMAN	5	1	259.69	7.79654e-07	2.2855e-05	3.81714	1	Probe	Control	P61981	14-3-3 protein gamma (Protein kinase C inhibitor protein 1) (KCIP-1) [Cleaved into: 14-3-3 protein gamma, N-terminally processed]	YWHAG
H0YFD6|H0YFD6_HUMAN;A0A2R8Y4F5|A0A2R8Y4F5_HUMAN;A0A2R8YG21|A0A2R8YG21_HUMAN;A0A2R8Y688|A0A2R8Y688_HUMAN	18	18	839.56	0.000355488	0.00158166	3.81433	0.997192	Probe	Control	H0YFD6	Trifunctional enzyme subunit alpha, mitochondrial	HADHA
P32455|GBP1_HUMAN;H3BNS1|H3BNS1_HUMAN;P32456|GBP2_HUMAN	7	7	310.24	0.00516297	0.0128038	3.80332	0.893345	Probe	Control	P32455	Guanylate-binding protein 1 (EC 3.6.5.-) (GTP-binding protein 1) (GBP-1) (HuGBP-1) (Guanine nucleotide-binding protein 1) (Interferon-induced guanylate-binding protein 1)	GBP1
P41091|IF2G_HUMAN;Q2VIR3|IF2GL_HUMAN;H7BZU1|H7BZU1_HUMAN	6	6	217.44	0.0240713	0.0396882	3.74261	0.668532	Probe	Control	P41091	Eukaryotic translation initiation factor 2 subunit 3 (Eukaryotic translation initiation factor 2 subunit gamma X) (eIF-2-gamma X) (eIF-2gX)	EIF2S3
P16435|NCPR_HUMAN;H0Y4R2|H0Y4R2_HUMAN;E7EMD0|E7EMD0_HUMAN;E7EWU0|E7EWU0_HUMAN	6	6	238.32	0.003479	0.00961255	3.71431	0.927456	Probe	Control	P16435	NADPH--cytochrome P450 reductase (CPR) (P450R) (EC 1.6.2.4)	POR
P29317|EPHA2_HUMAN	3	3	131.24	0.0151531	0.0293883	3.71104	0.750822	Probe	Control	P29317	Ephrin type-A receptor 2 (EC 2.7.10.1) (Epithelial cell kinase) (Tyrosine-protein kinase receptor ECK)	EPHA2
Q99805|TM9S2_HUMAN	2	2	91.7	0.00246525	0.00734841	3.70675	0.950055	Probe	Control	Q99805	Transmembrane 9 superfamily member 2 (p76)	TM9SF2
A0A384N5Y3|A0A384N5Y3_HUMAN;V9GZ78|V9GZ78_HUMAN;A0A494C1T2|A0A494C1T2_HUMAN	7	7	356.13	2.93844e-05	0.000261478	3.6978	0.999996	Probe	Control	A0A384N5Y3	C-1-tetrahydrofolate synthase, cytoplasmic (Epididymis secretory sperm binding protein)	MTHFD1
F5GXX5|F5GXX5_HUMAN;A0A0B4J239|A0A0B4J239_HUMAN	3	2	153.1	6.77184e-06	8.90794e-05	3.66483	1	Probe	Control	F5GXX5	Dolichyl-diphosphooligosaccharide--protein glycosyltransferase subunit DAD1 (Oligosaccharyl transferase subunit DAD1)	DAD1
H0YFA4|H0YFA4_HUMAN;H0YHD8|H0YHD8_HUMAN	2	2	140.02	0.000175792	0.00094975	3.64702	0.999343	Probe	Control	H0YFA4	Cysteine-rich protein 2 (Fragment)	CRIP2
A0A087X0X3|A0A087X0X3_HUMAN;M0R019|M0R019_HUMAN;M0QZM1|M0QZM1_HUMAN;M0R2I7|M0R2I7_HUMAN;M0QYQ7|M0QYQ7_HUMAN;M0R0N3|M0R0N3_HUMAN;M0R0Y6|M0R0Y6_HUMAN;M0QY96|M0QY96_HUMAN	13	12	568.48	6.83095e-05	0.000498002	3.58434	0.999939	Probe	Control	A0A087X0X3	Heterogeneous nuclear ribonucleoprotein M	HNRNPM
Q86Y82|STX12_HUMAN;B1AJQ6|B1AJQ6_HUMAN	2	2	73.03	0.00454801	0.0114667	3.5785	0.905319	Probe	Control	Q86Y82	Syntaxin-12	STX12
O75844|FACE1_HUMAN	4	4	173.23	0.0154931	0.0297299	3.57775	0.747134	Probe	Control	O75844	CAAX prenyl protease 1 homolog (EC 3.4.24.84) (Farnesylated proteins-converting enzyme 1) (FACE-1) (Prenyl protein-specific endoprotease 1) (Zinc metalloproteinase Ste24 homolog)	ZMPSTE24
Q567V2|M17L2_HUMAN	1	1	49.16	0.0018149	0.00578	3.57338	0.965262	Probe	Control	Q567V2	Mpv17-like protein 2	MPV17L2
P49720|PSB3_HUMAN;A0A087WUL2|A0A087WUL2_HUMAN	3	3	226.9	0.00787663	0.0175226	3.57243	0.846177	Probe	Control	P49720	Proteasome subunit beta type-3 (EC 3.4.25.1) (Proteasome chain 13) (Proteasome component C10-II) (Proteasome theta chain)	PSMB3
J3KQL8|J3KQL8_HUMAN;Q9BQE5|APOL2_HUMAN;E9PM95|E9PM95_HUMAN;B0QYK8|B0QYK8_HUMAN	5	5	449.65	1.16374e-06	2.84772e-05	3.56107	1	Probe	Control	J3KQL8	Apolipoprotein L2	APOL2
P55735|SEC13_HUMAN;A8MXL6|A8MXL6_HUMAN	2	2	94.69	0.00826066	0.0180453	3.53755	0.840146	Probe	Control	P55735	Protein SEC13 homolog (GATOR complex protein SEC13) (SEC13-like protein 1) (SEC13-related protein)	SEC13
A0A087WUK2|A0A087WUK2_HUMAN	3	1	109.04	7.56965e-05	0.000503341	3.53644	0.999919	Probe	Control	A0A087WUK2	Heterogeneous nuclear ribonucleoprotein D-like (Heterogeneous nuclear ribonucleoprotein D-like, isoform CRA_b)	HNRNPDL
K7ESK7|K7ESK7_HUMAN;Q9UBT2|SAE2_HUMAN	1	0	19.29	0.00403886	0.0105341	3.5277	0.915647	Probe	Control	K7ESK7	SUMO-activating enzyme subunit 2 (Fragment)	UBA2
A0A2U3TZU2|A0A2U3TZU2_HUMAN;K7EQ48|K7EQ48_HUMAN;A0A0J9YX90|A0A0J9YX90_HUMAN;K7EPY4|K7EPY4_HUMAN;K7ERC6|K7ERC6_HUMAN;K7EP41|K7EP41_HUMAN;A0A2R8YF08|A0A2R8YF08_HUMAN;K7ENA0|K7ENA0_HUMAN;K7ESF4|K7ESF4_HUMAN	11	11	479.55	2.83762e-06	4.90584e-05	3.5211	1	Probe	Control	A0A2U3TZU2	Glucose-6-phosphate isomerase (EC 5.3.1.9)	GPI
K4DIA7|K4DIA7_HUMAN;E9PJC8|E9PJC8_HUMAN	2	1	89.51	0.0102885	0.0217677	3.51276	0.810462	Probe	Control	K4DIA7	Tetraspanin (Fragment)	CD151
Q5JXB2|UE2NL_HUMAN	1	1	56.68	0.0108087	0.0223985	3.50418	0.803372	Probe	Control	Q5JXB2	Putative ubiquitin-conjugating enzyme E2 N-like (Epididymis tissue protein Li 174)	UBE2NL
P62258|1433E_HUMAN;K7EM20|K7EM20_HUMAN;B4DJF2|B4DJF2_HUMAN;K7EIT4|K7EIT4_HUMAN;I3L0W5|I3L0W5_HUMAN	13	11	736.1	6.88943e-07	2.2855e-05	3.49163	1	Probe	Control	P62258	14-3-3 protein epsilon (14-3-3E)	YWHAE
H0Y8G5|H0Y8G5_HUMAN;D6RAF8|D6RAF8_HUMAN;D6RD83|D6RD83_HUMAN	4	2	126.66	2.8787e-05	0.000259986	3.43906	0.999996	Probe	Control	H0Y8G5	Heterogeneous nuclear ribonucleoprotein D0 (Fragment)	HNRNPD
O14879|IFIT3_HUMAN	8	8	569.66	7.52363e-06	9.50408e-05	3.42727	1	Probe	Control	O14879	Interferon-induced protein with tetratricopeptide repeats 3 (IFIT-3) (CIG49) (ISG-60) (Interferon-induced 60 kDa protein) (IFI-60K) (Interferon-induced protein with tetratricopeptide repeats 4) (IFIT-4) (Retinoic acid-induced gene G protein) (P60) (RIG-G)	IFIT3
O00461|GOLI4_HUMAN;F8W785|F8W785_HUMAN	3	3	140.71	0.00396634	0.0104349	3.32543	0.91715	Probe	Control	O00461	Golgi integral membrane protein 4 (Golgi integral membrane protein, cis) (GIMPc) (Golgi phosphoprotein 4) (Golgi-localized phosphoprotein of 130 kDa) (Golgi phosphoprotein of 130 kDa)	GOLIM4
Q9UBI6|GBG12_HUMAN	2	1	93.28	0.0037125	0.0098962	3.30206	0.922472	Probe	Control	Q9UBI6	Guanine nucleotide-binding protein G(I)/G(S)/G(O) subunit gamma-12	GNG12
A0A0A0MS74|A0A0A0MS74_HUMAN	1	1	37.67	0.0258167	0.0415471	3.28243	0.655189	Probe	Control	A0A0A0MS74	Phosphoenolpyruvate carboxykinase [GTP], mitochondrial	PCK2
A0A087WTP3|A0A087WTP3_HUMAN;M0QYH3|M0QYH3_HUMAN;M0QXW7|M0QXW7_HUMAN;M0R0I5|M0R0I5_HUMAN	5	5	376.06	0.00419457	0.0108006	3.25417	0.912448	Probe	Control	A0A087WTP3	Far upstream element-binding protein 2	KHSRP
P11279|LAMP1_HUMAN	1	1	41.8	0.0118502	0.0240624	3.18465	0.789746	Probe	Control	P11279	Lysosome-associated membrane glycoprotein 1 (LAMP-1) (Lysosome-associated membrane protein 1) (CD107 antigen-like family member A) (CD antigen CD107a)	LAMP1
J3KTF8|J3KTF8_HUMAN;J3KRE2|J3KRE2_HUMAN;J3KRY1|J3KRY1_HUMAN	4	4	194.13	6.24879e-05	0.000461116	3.18201	0.999953	Probe	Control	J3KTF8	Rho GDP-dissociation inhibitor 1 (Fragment)	ARHGDIA
P38117|ETFB_HUMAN;M0QY67|M0QY67_HUMAN	3	3	114.75	0.00357778	0.00970817	3.18131	0.925338	Probe	Control	P38117	Electron transfer flavoprotein subunit beta (Beta-ETF)	ETFB
P63104|1433Z_HUMAN;E7EX29|E7EX29_HUMAN;B0AZS6|B0AZS6_HUMAN;E7ESK7|E7ESK7_HUMAN;B7Z2E6|B7Z2E6_HUMAN;E5RGE1|E5RGE1_HUMAN;P31947|1433S_HUMAN	12	9	746.75	2.81743e-06	4.90584e-05	3.12957	1	Probe	Control	P63104	14-3-3 protein zeta/delta (Protein kinase C inhibitor protein 1) (KCIP-1)	YWHAZ
Q9UMX5|NENF_HUMAN	3	3	197.65	0.0031949	0.00899472	3.12945	0.933634	Probe	Control	Q9UMX5	Neudesin (Cell immortalization-related protein 2) (Neuron-derived neurotrophic factor) (Protein GIG47) (Secreted protein of unknown function) (SPUF protein)	NENF
F8W914|F8W914_HUMAN;Q9NQC3|RTN4_HUMAN;H7C106|H7C106_HUMAN;A0A0U1RQR6|A0A0U1RQR6_HUMAN	8	8	449.79	0.00387512	0.0102844	3.10932	0.919051	Probe	Control	F8W914	Reticulon	RTN4
Q15417|CNN3_HUMAN;E9PDU6|E9PDU6_HUMAN	2	1	59.8	0.00933108	0.0201652	3.09049	0.824048	Probe	Control	Q15417	Calponin-3 (Calponin, acidic isoform)	CNN3
P52292|IMA1_HUMAN;J3KS65|J3KS65_HUMAN	8	8	466.26	3.13023e-05	0.000274508	3.0899	0.999995	Probe	Control	P52292	Importin subunit alpha-1 (Karyopherin subunit alpha-2) (RAG cohort protein 1) (SRP1-alpha)	KPNA2
Q8WUM4|PDC6I_HUMAN;A0A3B3IT07|A0A3B3IT07_HUMAN;C9IZF9|C9IZF9_HUMAN;F8WBR8|F8WBR8_HUMAN	6	6	272.91	0.00193282	0.00605986	3.08357	0.962477	Probe	Control	Q8WUM4	Programmed cell death 6-interacting protein (PDCD6-interacting protein) (ALG-2-interacting protein 1) (ALG-2-interacting protein X) (Hp95)	PDCD6IP
J3KSP2|J3KSP2_HUMAN	1	1	75.38	0.0181041	0.0325068	3.07948	0.720491	Probe	Control	J3KSP2	60S ribosomal protein L38 (Fragment)	RPL38
E5RGA2|E5RGA2_HUMAN;H0YAW4|H0YAW4_HUMAN;H0YBR5|H0YBR5_HUMAN	3	3	82.24	0.0387422	0.0568023	3.05867	0.574225	Probe	Control	E5RGA2	Eukaryotic translation initiation factor 3 subunit E (eIF3e) (Eukaryotic translation initiation factor 3 subunit 6) (eIF-3 p48)	EIF3E
Q9UGP8|SEC63_HUMAN;A6PVC9|A6PVC9_HUMAN	3	3	97.8	0.0244611	0.0400039	3.05227	0.665488	Probe	Control	Q9UGP8	Translocation protein SEC63 homolog	SEC63
A0A0A0MSV9|A0A0A0MSV9_HUMAN;Q6P1N7|Q6P1N7_HUMAN;C9JA35|C9JA35_HUMAN;A0A0A0MT98|A0A0A0MT98_HUMAN	4	4	140.27	0.00587431	0.0139374	3.04862	0.880133	Probe	Control	A0A0A0MSV9	Tapasin	TAPBP
P05388|RLA0_HUMAN;F8VU65|F8VU65_HUMAN;F8VWS0|F8VWS0_HUMAN;F8VPE8|F8VPE8_HUMAN;G3V210|G3V210_HUMAN;F8VQY6|F8VQY6_HUMAN;Q8NHW5|RLA0L_HUMAN;F8VS58|F8VS58_HUMAN;F8VWV4|F8VWV4_HUMAN;F8W1K8|F8W1K8_HUMAN	9	9	588.1	7.69624e-06	9.50408e-05	3.04792	1	Probe	Control	P05388	60S acidic ribosomal protein P0 (60S ribosomal protein L10E) (Large ribosomal subunit protein uL10)	RPLP0
O14818|PSA7_HUMAN;H0Y586|H0Y586_HUMAN;Q8TAA3|PSMA8_HUMAN;A0A087WYS6|A0A087WYS6_HUMAN;F5GY34|F5GY34_HUMAN	4	4	243.03	0.000732513	0.00267015	3.02267	0.990227	Probe	Control	O14818	Proteasome subunit alpha type-7 (EC 3.4.25.1) (Proteasome subunit RC6-1) (Proteasome subunit XAPC7)	PSMA7
O15173|PGRC2_HUMAN;U3KQM0|U3KQM0_HUMAN	4	3	182.65	0.00584417	0.0139374	2.99897	0.880679	Probe	Control	O15173	Membrane-associated progesterone receptor component 2 (Progesterone membrane-binding protein) (Steroid receptor protein DG6)	PGRMC2
P04899|GNAI2_HUMAN;P08754|GNAI3_HUMAN;P63096|GNAI1_HUMAN;P09471|GNAO_HUMAN;A0A087WTB6|A0A087WTB6_HUMAN;A0A1W2PP38|A0A1W2PP38_HUMAN	12	11	804.32	0.000148908	0.000858136	2.9963	0.999551	Probe	Control	P04899	Guanine nucleotide-binding protein G(i) subunit alpha-2 (Adenylate cyclase-inhibiting G alpha protein)	GNAI2
P52907|CAZA1_HUMAN;A0A0D9SET8|A0A0D9SET8_HUMAN	3	3	115.07	0.0346308	0.0518692	2.99529	0.597137	Probe	Control	P52907	F-actin-capping protein subunit alpha-1 (CapZ alpha-1)	CAPZA1
C9JW96|C9JW96_HUMAN;C9JZ20|C9JZ20_HUMAN;D6RBK0|D6RBK0_HUMAN	8	8	457.58	0.000220432	0.00107568	2.98565	0.998922	Probe	Control	C9JW96	Prohibitin (Fragment)	PHB
Q9NSE4|SYIM_HUMAN	1	1	67.27	0.0104519	0.0220365	2.98093	0.808213	Probe	Control	Q9NSE4	Isoleucine--tRNA ligase, mitochondrial (EC 6.1.1.5) (Isoleucyl-tRNA synthetase) (IleRS)	IARS2
P62244|RS15A_HUMAN;I3L3P7|I3L3P7_HUMAN;I3L246|I3L246_HUMAN;H3BT37|H3BT37_HUMAN;H3BVC7|H3BVC7_HUMAN	5	3	290.5	0.000192226	0.000985904	2.95367	0.999198	Probe	Control	P62244	40S ribosomal protein S15a (Small ribosomal subunit protein uS8)	RPS15A
O00299|CLIC1_HUMAN	10	10	533.47	7.46163e-07	2.2855e-05	2.93711	1	Probe	Control	O00299	Chloride intracellular channel protein 1 (Chloride channel ABP) (Nuclear chloride ion channel 27) (NCC27) (Regulatory nuclear chloride ion channel protein) (hRNCC)	CLIC1
O75396|SC22B_HUMAN;A0A087X1A9|A0A087X1A9_HUMAN	4	4	271.78	0.000167798	0.000923042	2.93416	0.999408	Probe	Control	O75396	Vesicle-trafficking protein SEC22b (ER-Golgi SNARE of 24 kDa) (ERS-24) (ERS24) (SEC22 vesicle-trafficking protein homolog B) (SEC22 vesicle-trafficking protein-like 1)	SEC22B
Q96HC4|PDLI5_HUMAN;H0Y8Y3|H0Y8Y3_HUMAN;A0A0A0MSP3|A0A0A0MSP3_HUMAN;A0A0D9SFR4|A0A0D9SFR4_HUMAN	9	9	305.88	0.0205112	0.0355625	2.89819	0.69821	Probe	Control	Q96HC4	PDZ and LIM domain protein 5 (Enigma homolog) (Enigma-like PDZ and LIM domains protein)	PDLIM5
Q15019|SEPT2_HUMAN;B5MCX3|B5MCX3_HUMAN;C9IZU3|C9IZU3_HUMAN;C9J2Q4|C9J2Q4_HUMAN;H7C2Y0|H7C2Y0_HUMAN;A0A1B0GXJ2|A0A1B0GXJ2_HUMAN;B5MD47|B5MD47_HUMAN;C9IY94|C9IY94_HUMAN	5	5	209.18	7.4175e-05	0.000503341	2.87918	0.999924	Probe	Control	Q15019	Septin-2 (Neural precursor cell expressed developmentally down-regulated protein 5) (NEDD-5)	SEPTIN2
P35606|COPB2_HUMAN;D6R997|D6R997_HUMAN;D6RBG7|D6RBG7_HUMAN;H0Y938|H0Y938_HUMAN;H0YAC7|H0YAC7_HUMAN	9	8	290.69	0.0101741	0.0216013	2.87623	0.812047	Probe	Control	P35606	Coatomer subunit beta' (Beta'-coat protein) (Beta'-COP) (p102)	COPB2
G3XAM7|G3XAM7_HUMAN;E5RIB1|E5RIB1_HUMAN;E5RG03|E5RG03_HUMAN;E5RJ41|E5RJ41_HUMAN;E5RGY6|E5RGY6_HUMAN	5	4	267.21	0.00218957	0.00672545	2.8762	0.956449	Probe	Control	G3XAM7	Catenin (Cadherin-associated protein), alpha 1, 102kDa, isoform CRA_a (Catenin alpha-1)	CTNNA1
P55010|IF5_HUMAN;H0YK11|H0YK11_HUMAN	4	4	132.02	0.0158399	0.0297299	2.87183	0.743429	Probe	Control	P55010	Eukaryotic translation initiation factor 5 (eIF-5)	EIF5
P34931|HS71L_HUMAN	6	0	325.91	8.40615e-06	0.000101731	2.86433	1	Probe	Control	P34931	Heat shock 70 kDa protein 1-like (Heat shock 70 kDa protein 1L) (Heat shock 70 kDa protein 1-Hom) (HSP70-Hom)	HSPA1L
K7ERI8|K7ERI8_HUMAN;F8VVK3|F8VVK3_HUMAN;K7ENY4|K7ENY4_HUMAN;F8VUA5|F8VUA5_HUMAN;F8VPW9|F8VPW9_HUMAN	4	2	228.04	0.00236207	0.00711089	2.84711	0.952438	Probe	Control	K7ERI8	Uncharacterized protein
P27348|1433T_HUMAN;E9PG15|E9PG15_HUMAN	10	8	603.44	3.96983e-07	1.84781e-05	2.84667	1	Probe	Control	P27348	14-3-3 protein theta (14-3-3 protein T-cell) (14-3-3 protein tau) (Protein HS1)	YWHAQ
P60468|SC61B_HUMAN;S4R3B5|S4R3B5_HUMAN	2	2	99.7	7.43259e-05	0.000503341	2.84321	0.999923	Probe	Control	P60468	Protein transport protein Sec61 subunit beta	SEC61B
P50395|GDIB_HUMAN;Q5SX87|Q5SX87_HUMAN;Q5SX91|Q5SX91_HUMAN;Q5SX86|Q5SX86_HUMAN;Q5SX90|Q5SX90_HUMAN;V9GYJ7|V9GYJ7_HUMAN;G5E9U5|G5E9U5_HUMAN	13	9	561.8	3.81725e-06	5.92263e-05	2.82725	1	Probe	Control	P50395	Rab GDP dissociation inhibitor beta (Rab GDI beta) (Guanosine diphosphate dissociation inhibitor 2) (GDI-2)	GDI2
P30084|ECHM_HUMAN	4	4	158.83	0.00264591	0.00777207	2.78738	0.945918	Probe	Control	P30084	Enoyl-CoA hydratase, mitochondrial (EC 4.2.1.17) (Enoyl-CoA hydratase 1) (Short-chain enoyl-CoA hydratase) (SCEH)	ECHS1
P11021|BIP_HUMAN;O95399|UTS2_HUMAN	30	26	1974.65	1.95201e-07	1.84781e-05	2.78024	1	Probe	Control	P11021	Endoplasmic reticulum chaperone BiP (EC 3.6.4.10) (78 kDa glucose-regulated protein) (GRP-78) (Binding-immunoglobulin protein) (BiP) (Heat shock protein 70 family protein 5) (HSP70 family protein 5) (Heat shock protein family A member 5) (Immunoglobulin heavy chain-binding protein)	HSPA5
P07900|HS90A_HUMAN;G3V2J8|G3V2J8_HUMAN;Q14568|HS902_HUMAN;Q58FG0|HS905_HUMAN;Q9NQH7|XPP3_HUMAN	29	15	1826.09	1.04922e-05	0.000119789	2.76645	1	Probe	Control	P07900	Heat shock protein HSP 90-alpha (Heat shock 86 kDa) (HSP 86) (HSP86) (Lipopolysaccharide-associated protein 2) (LAP-2) (LPS-associated protein 2) (Renal carcinoma antigen NY-REN-38)	HSP90AA1
O14980|XPO1_HUMAN;C9IZS4|C9IZS4_HUMAN;C9IYM2|C9IYM2_HUMAN	6	6	245.73	0.00352745	0.0096582	2.745	0.926415	Probe	Control	O14980	Exportin-1 (Exp1) (Chromosome region maintenance 1 protein homolog)	XPO1
P26639|SYTC_HUMAN;A2RTX5|SYTC2_HUMAN;D6R9F8|D6R9F8_HUMAN	6	6	187.23	0.000185231	0.000979615	2.74117	0.999261	Probe	Control	P26639	Threonine--tRNA ligase, cytoplasmic (EC 6.1.1.3) (Threonyl-tRNA synthetase) (ThrRS)	TARS
Q8NBS9|TXND5_HUMAN	11	10	577.92	0.000996655	0.00352677	2.73803	0.984444	Probe	Control	Q8NBS9	Thioredoxin domain-containing protein 5 (Endoplasmic reticulum resident protein 46) (ER protein 46) (ERp46) (Thioredoxin-like protein p46)	TXNDC5
Q08380|LG3BP_HUMAN;K7EP36|K7EP36_HUMAN;K7EKQ5|K7EKQ5_HUMAN;K7EJD3|K7EJD3_HUMAN;K7EJY8|K7EJY8_HUMAN;K7EN99|K7EN99_HUMAN	10	10	592.15	0.000546835	0.00210758	2.73801	0.993933	Probe	Control	Q08380	Galectin-3-binding protein (Basement membrane autoantigen p105) (Lectin galactoside-binding soluble 3-binding protein) (Mac-2-binding protein) (MAC2BP) (Mac-2 BP) (Tumor-associated antigen 90K)	LGALS3BP
P05023|AT1A1_HUMAN;A0A0A0MT26|A0A0A0MT26_HUMAN;B1AKY9|B1AKY9_HUMAN;H0Y7C1|H0Y7C1_HUMAN;Q5TC01|Q5TC01_HUMAN;P54707|AT12A_HUMAN;Q13733|AT1A4_HUMAN;Q5TC02|Q5TC02_HUMAN;M0QXF2|M0QXF2_HUMAN;P20648|ATP4A_HUMAN;E9PRA5|E9PRA5_HUMAN	20	19	1018.46	8.68282e-05	0.000553051	2.73036	0.999883	Probe	Control	P05023	Sodium/potassium-transporting ATPase subunit alpha-1 (Na(+)/K(+) ATPase alpha-1 subunit) (EC 7.2.2.13) (Sodium pump subunit alpha-1)	ATP1A1
P32969|RL9_HUMAN;A0A2R8Y5Y7|A0A2R8Y5Y7_HUMAN;D6RAN4|D6RAN4_HUMAN;H0Y9V9|H0Y9V9_HUMAN;E7ESE0|E7ESE0_HUMAN;H0Y9R4|H0Y9R4_HUMAN	8	8	344.99	0.000365285	0.00161339	2.72482	0.997044	Probe	Control	P32969	60S ribosomal protein L9 (Large ribosomal subunit protein uL6)	RPL9
Q9UQ80|PA2G4_HUMAN;F8VR77|F8VR77_HUMAN;F8W0A3|F8W0A3_HUMAN	5	5	188.37	0.00534466	0.0130934	2.72202	0.889907	Probe	Control	Q9UQ80	Proliferation-associated protein 2G4 (Cell cycle protein p38-2G4 homolog) (hG4-1) (ErbB3-binding protein 1)	PA2G4
P07996|TSP1_HUMAN;A0A3B3ITK0|A0A3B3ITK0_HUMAN	9	8	377.83	0.0283513	0.0444093	2.71819	0.637023	Probe	Control	P07996	Thrombospondin-1 (Glycoprotein G)	THBS1
P63000|RAC1_HUMAN;B1AH78|B1AH78_HUMAN	3	2	109.35	0.00419409	0.0108006	2.71528	0.912458	Probe	Control	P63000	Ras-related C3 botulinum toxin substrate 1 (EC 3.6.5.2) (Cell migration-inducing gene 5 protein) (Ras-like protein TC25) (p21-Rac1)	RAC1
P17066|HSP76_HUMAN	8	0	388.21	2.38551e-05	0.000225543	2.71255	0.999998	Probe	Control	P17066	Heat shock 70 kDa protein 6 (Heat shock 70 kDa protein B')	HSPA6
Q15758|AAAT_HUMAN;M0QXM4|M0QXM4_HUMAN;M0QX44|M0QX44_HUMAN	3	3	101.78	0.016322	0.0301111	2.70842	0.738367	Probe	Control	Q15758	Neutral amino acid transporter B(0) (ATB(0)) (Baboon M7 virus receptor) (RD114/simian type D retrovirus receptor) (Sodium-dependent neutral amino acid transporter type 2) (Solute carrier family 1 member 5)	SLC1A5
K7EM49|K7EM49_HUMAN;K7EMN2|K7EMN2_HUMAN	2	2	63.94	0.0133071	0.0264004	2.7054	0.771835	Probe	Control	K7EM49	6-phosphogluconate dehydrogenase, decarboxylating (Fragment)	PGD
E9PGZ1|E9PGZ1_HUMAN	1	1	65.41	0.0235951	0.0391162	2.69291	0.672301	Probe	Control	E9PGZ1	Caldesmon	CALD1
P08238|HS90B_HUMAN;Q58FF7|H90B3_HUMAN;Q58FF8|H90B2_HUMAN;Q58FG1|HS904_HUMAN	34	18	2216.76	1.81147e-06	3.42538e-05	2.67704	1	Probe	Control	P08238	Heat shock protein HSP 90-beta (HSP 90) (Heat shock 84 kDa) (HSP 84) (HSP84)	HSP90AB1
P20592|MX2_HUMAN	5	2	492.73	2.33851e-05	0.000224609	2.66035	0.999998	Probe	Control	P20592	Interferon-induced GTP-binding protein Mx2 (Interferon-regulated resistance GTP-binding protein MxB) (Myxovirus resistance protein 2) (p78-related protein)	MX2
P05455|LA_HUMAN;E7ERC4|E7ERC4_HUMAN	2	1	70.25	0.0145798	0.028551	2.65613	0.757162	Probe	Control	P05455	Lupus La protein (La autoantigen) (La ribonucleoprotein) (Sjoegren syndrome type B antigen) (SS-B)	SSB
H0YNA5|H0YNA5_HUMAN	1	1	39.61	0.0203283	0.0355511	2.6481	0.699834	Probe	Control	H0YNA5	Signal peptidase I (EC 3.4.21.89) (Fragment)	SEC11A
P15531|NDKA_HUMAN;E7ERL0|E7ERL0_HUMAN;O60361|NDK8_HUMAN;C9K028|C9K028_HUMAN	4	4	390.01	0.00713922	0.0161796	2.62695	0.85817	Probe	Control	P15531	Nucleoside diphosphate kinase A (NDK A) (NDP kinase A) (EC 2.7.4.6) (Granzyme A-activated DNase) (GAAD) (Metastasis inhibition factor nm23) (NM23-H1) (Tumor metastatic process-associated protein)	NME1
E7EQR4|E7EQR4_HUMAN	9	3	352.56	3.66466e-05	0.000312235	2.62595	0.999991	Probe	Control	E7EQR4	Ezrin	EZR
P24752|THIL_HUMAN;E9PRQ6|E9PRQ6_HUMAN	2	2	111.05	0.00444167	0.0112927	2.60695	0.907445	Probe	Control	P24752	Acetyl-CoA acetyltransferase, mitochondrial (EC 2.3.1.9) (Acetoacetyl-CoA thiolase) (T2)	ACAT1
B4DY09|B4DY09_HUMAN;X6R6Z1|X6R6Z1_HUMAN;A0A0A0MRL0|A0A0A0MRL0_HUMAN	5	5	206.06	0.00568334	0.0137012	2.60383	0.883615	Probe	Control	B4DY09	Interleukin enhancer-binding factor 2 (cDNA FLJ51660, highly similar to Interleukin enhancer-binding factor 2)	ILF2
A0A0G2JIW1|A0A0G2JIW1_HUMAN;V9GZ37|V9GZ37_HUMAN;P48741|HSP77_HUMAN	12	4	596.7	1.77021e-05	0.000181552	2.59106	0.999999	Probe	Control	A0A0G2JIW1	Heat shock 70 kDa protein 1B	HSPA1B
Q9UBM7|DHCR7_HUMAN;E9PJ54|E9PJ54_HUMAN;E9PIP9|E9PIP9_HUMAN;H0YE57|H0YE57_HUMAN	3	3	128.24	0.00434564	0.0110952	2.58234	0.909378	Probe	Control	Q9UBM7	7-dehydrocholesterol reductase (7-DHC reductase) (EC 1.3.1.21) (Delta7-sterol reductase) (Sterol Delta(7)-reductase) (Sterol reductase SR-2)	DHCR7
F8VV69|F8VV69_HUMAN;Q6N075|MFSD5_HUMAN	2	2	82.1	0.000245083	0.0011864	2.5801	0.998654	Probe	Control	F8VV69	Molybdate-anion transporter (Fragment)	MFSD5
Q06323|PSME1_HUMAN;H0YKK6|H0YKK6_HUMAN;H0YLU2|H0YLU2_HUMAN	6	5	214.15	0.017621	0.0317337	2.57461	0.725212	Probe	Control	Q06323	Proteasome activator complex subunit 1 (11S regulator complex subunit alpha) (REG-alpha) (Activator of multicatalytic protease subunit 1) (Interferon gamma up-regulated I-5111 protein) (IGUP I-5111) (Proteasome activator 28 subunit alpha) (PA28a) (PA28alpha)	PSME1
B4DDD8|B4DDD8_HUMAN;B3KWE1|B3KWE1_HUMAN;E7ETE2|E7ETE2_HUMAN;D6RJE6|D6RJE6_HUMAN;A0A2R8YCI2|A0A2R8YCI2_HUMAN	5	5	168.66	0.00389526	0.0102927	2.57094	0.91863	Probe	Control	B4DDD8	Histidine--tRNA ligase, cytoplasmic (cDNA FLJ53703, highly similar to Histidyl-tRNA synthetase)	HARS
Q9Y6C9|MTCH2_HUMAN;E9PIE4|E9PIE4_HUMAN	6	5	213.87	0.0354433	0.0526948	2.55898	0.59243	Probe	Control	Q9Y6C9	Mitochondrial carrier homolog 2 (Met-induced mitochondrial protein)	MTCH2
P09211|GSTP1_HUMAN;A8MX94|A8MX94_HUMAN;A0A087X2E9|A0A087X2E9_HUMAN;A0A087X243|A0A087X243_HUMAN	9	9	574.15	4.07646e-05	0.000325734	2.54818	0.999987	Probe	Control	P09211	Glutathione S-transferase P (EC 2.5.1.18) (GST class-pi) (GSTP1-1)	GSTP1
P09914|IFIT1_HUMAN	10	10	718.97	0.000654577	0.00247554	2.53471	0.991831	Probe	Control	P09914	Interferon-induced protein with tetratricopeptide repeats 1 (IFIT-1) (Interferon-induced 56 kDa protein) (IFI-56K) (P56)	IFIT1
E9PBS1|E9PBS1_HUMAN;D6RF62|D6RF62_HUMAN	7	6	329.93	0.000461158	0.001848	2.53269	0.995482	Probe	Control	E9PBS1	Multifunctional protein ADE2 (Fragment)	PAICS
P07355|ANXA2_HUMAN;H0YN42|H0YN42_HUMAN;H0YMD0|H0YMD0_HUMAN;A6NMY6|AXA2L_HUMAN;H0YKS4|H0YKS4_HUMAN;H0YM50|H0YM50_HUMAN;H0YNP5|H0YNP5_HUMAN;H0YL33|H0YL33_HUMAN;H0YMM1|H0YMM1_HUMAN;H0YKX9|H0YKX9_HUMAN;H0YKL9|H0YKL9_HUMAN;H0YMW4|H0YMW4_HUMAN;H0YNA0|H0YNA0_HUMAN;H0YKV8|H0YKV8_HUMAN;H0YN52|H0YN52_HUMAN;H0YMD9|H0YMD9_HUMAN;H0YKN4|H0YKN4_HUMAN;H0YLE2|H0YLE2_HUMAN	22	22	1659.08	0.000442849	0.0018106	2.5204	0.995796	Probe	Control	P07355	Annexin A2 (Annexin II) (Annexin-2) (Calpactin I heavy chain) (Calpactin-1 heavy chain) (Chromobindin-8) (Lipocortin II) (Placental anticoagulant protein IV) (PAP-IV) (Protein I) (p36)	ANXA2
P46940|IQGA1_HUMAN;A0A0J9YXZ5|A0A0J9YXZ5_HUMAN;H0YLE8|H0YLE8_HUMAN;H0YKA5|H0YKA5_HUMAN;A0A087WWP1|A0A087WWP1_HUMAN;A0A087X225|A0A087X225_HUMAN;F2Z2E2|F2Z2E2_HUMAN	21	20	939.03	0.0236935	0.039172	2.51343	0.671518	Probe	Control	P46940	Ras GTPase-activating-like protein IQGAP1 (p195)	IQGAP1
P68366|TBA4A_HUMAN;C9JEV8|C9JEV8_HUMAN	15	1	1167.36	3.00535e-06	4.91497e-05	2.50678	1	Probe	Control	P68366	Tubulin alpha-4A chain (Alpha-tubulin 1) (Testis-specific alpha-tubulin) (Tubulin H2-alpha) (Tubulin alpha-1 chain)	TUBA4A
J3QS39|J3QS39_HUMAN;M0R1M6|M0R1M6_HUMAN;M0R1V7|M0R1V7_HUMAN;F5GZ39|F5GZ39_HUMAN	5	5	296.27	0.00667701	0.01548	2.50034	0.865982	Probe	Control	J3QS39	Polyubiquitin-B (Fragment)	UBB
P24390|ERD21_HUMAN;M0R1Y2|M0R1Y2_HUMAN	2	1	241.39	0.000700637	0.00258138	2.4972	0.99089	Probe	Control	P24390	ER lumen protein-retaining receptor 1 (KDEL endoplasmic reticulum protein retention receptor 1) (KDEL receptor 1) (Putative MAPK-activating protein PM23)	KDELR1
P46977|STT3A_HUMAN;A0A0C4DH80|A0A0C4DH80_HUMAN;H0YET6|H0YET6_HUMAN	10	9	399.38	0.000321118	0.00145007	2.46979	0.997688	Probe	Control	P46977	Dolichyl-diphosphooligosaccharide--protein glycosyltransferase subunit STT3A (Oligosaccharyl transferase subunit STT3A) (STT3-A) (EC 2.4.99.18) (B5) (Integral membrane protein 1) (Transmembrane protein TMC)	STT3A
Q00325|MPCP_HUMAN	9	1	343.47	0.00120126	0.00410669	2.46774	0.979741	Probe	Control	Q00325	Phosphate carrier protein, mitochondrial (Phosphate transport protein) (PTP) (Solute carrier family 25 member 3)	SLC25A3
Q5VVC8|Q5VVC8_HUMAN	1	1	77.36	0.000203645	0.00101005	2.46304	0.999091	Probe	Control	Q5VVC8	60S ribosomal protein L11	RPL11
A0A499FI48|A0A499FI48_HUMAN	4	4	235.51	0.0475687	0.0680376	2.44994	0.531529	Probe	Control	A0A499FI48	Protein disulfide-isomerase (EC 5.3.4.1)	PDIA4
E7ETU9|E7ETU9_HUMAN;C9JXZ0|C9JXZ0_HUMAN	7	7	281.19	0.0387433	0.0568023	2.43825	0.574219	Probe	Control	E7ETU9	Procollagen-lysine,2-oxoglutarate 5-dioxygenase 2	PLOD2
E9PEX6|E9PEX6_HUMAN	2	2	95.25	0.0162425	0.0300562	2.43461	0.739194	Probe	Control	E9PEX6	Dihydrolipoyl dehydrogenase (EC 1.8.1.4)	DLD
P31930|QCR1_HUMAN	3	3	220.21	0.0233771	0.0389683	2.43279	0.674046	Probe	Control	P31930	Cytochrome b-c1 complex subunit 1, mitochondrial (Complex III subunit 1) (Core protein I) (Ubiquinol-cytochrome-c reductase complex core protein 1)	UQCRC1
A0A087X0V5|A0A087X0V5_HUMAN;F8W1C5|F8W1C5_HUMAN	8	8	374.19	0.00134602	0.00455015	2.42515	0.976353	Probe	Control	A0A087X0V5	2'-5'-oligoadenylate synthase 2	OAS2
P20339|RAB5A_HUMAN	3	1	173.36	0.0044887	0.0113645	2.41735	0.906503	Probe	Control	P20339	Ras-related protein Rab-5A	RAB5A
Q9NZM1|MYOF_HUMAN;H0YD14|H0YD14_HUMAN	8	7	360.38	0.00314978	0.00899026	2.40445	0.934626	Probe	Control	Q9NZM1	Myoferlin (Fer-1-like protein 3)	MYOF
P07195|LDHB_HUMAN;A0A3B3IS95|A0A3B3IS95_HUMAN;A8MW50|A8MW50_HUMAN;C9J7H8|C9J7H8_HUMAN	10	9	636.2	0.000214985	0.00105762	2.3985	0.998978	Probe	Control	P07195	L-lactate dehydrogenase B chain (LDH-B) (EC 1.1.1.27) (LDH heart subunit) (LDH-H) (Renal carcinoma antigen NY-REN-46)	LDHB
B9A067|B9A067_HUMAN;C9J406|C9J406_HUMAN;A0A087WYS0|A0A087WYS0_HUMAN	6	6	326.86	0.0269238	0.0428727	2.39537	0.647088	Probe	Control	B9A067	MICOS complex subunit MIC60 (Mitofilin)	IMMT
Q15293|RCN1_HUMAN;E9PP27|E9PP27_HUMAN	13	13	883.18	0.0234636	0.0390051	2.39333	0.673352	Probe	Control	Q15293	Reticulocalbin-1	RCN1
Q9ULV4|COR1C_HUMAN;B4E3S0|B4E3S0_HUMAN;F8VRE9|F8VRE9_HUMAN;H0YHL7|H0YHL7_HUMAN	3	3	147.61	0.0306333	0.0472864	2.38694	0.621753	Probe	Control	Q9ULV4	Coronin-1C (Coronin-3) (hCRNN4)	CORO1C
P18206|VINC_HUMAN;A0A096LPE1|A0A096LPE1_HUMAN	9	9	428.7	0.00356224	0.00970817	2.38114	0.92567	Probe	Control	P18206	Vinculin (Metavinculin) (MV)	VCL
A0A0C4DGS1|A0A0C4DGS1_HUMAN;U3KQ84|U3KQ84_HUMAN	5	5	272.81	0.00674293	0.0155731	2.3578	0.864853	Probe	Control	A0A0C4DGS1	Dolichyl-diphosphooligosaccharide--protein glycosyltransferase 48 kDa subunit (Oligosaccharyl transferase 48 kDa subunit)	DDOST
P18669|PGAM1_HUMAN;P15259|PGAM2_HUMAN;Q8N0Y7|PGAM4_HUMAN	9	9	506.77	0.00576889	0.0138522	2.35662	0.88205	Probe	Control	P18669	Phosphoglycerate mutase 1 (EC 5.4.2.11) (EC 5.4.2.4) (BPG-dependent PGAM 1) (Phosphoglycerate mutase isozyme B) (PGAM-B)	PGAM1
P17655|CAN2_HUMAN	6	6	230.71	0.00724387	0.0163555	2.35286	0.856434	Probe	Control	P17655	Calpain-2 catalytic subunit (EC 3.4.22.53) (Calcium-activated neutral proteinase 2) (CANP 2) (Calpain M-type) (Calpain large polypeptide L2) (Calpain-2 large subunit) (Millimolar-calpain) (M-calpain)	CAPN2
Q04917|1433F_HUMAN;A2IDB2|A2IDB2_HUMAN	5	1	261.4	3.38887e-06	5.39634e-05	2.35155	1	Probe	Control	Q04917	14-3-3 protein eta (Protein AS1)	YWHAH
A0A087X0L7|A0A087X0L7_HUMAN;C9JC63|C9JC63_HUMAN	2	2	70.08	0.023152	0.0386997	2.3426	0.675861	Probe	Control	A0A087X0L7	Mitochondrial inner membrane protein OXA1L	OXA1L
P12236|ADT3_HUMAN;P12235|ADT1_HUMAN;V9GYG0|V9GYG0_HUMAN;Q9H0C2|ADT4_HUMAN	16	6	849.46	0.00223796	0.00683936	2.33864	0.955321	Probe	Control	P12236	ADP/ATP translocase 3 (ADP,ATP carrier protein 3) (ADP,ATP carrier protein, isoform T2) (ANT 2) (Adenine nucleotide translocator 3) (ANT 3) (Solute carrier family 25 member 6) [Cleaved into: ADP/ATP translocase 3, N-terminally processed]	SLC25A6
Q12931|TRAP1_HUMAN;I3L0K7|I3L0K7_HUMAN;I3L239|I3L239_HUMAN	4	3	215.87	7.68889e-06	9.50408e-05	2.33726	1	Probe	Control	Q12931	Heat shock protein 75 kDa, mitochondrial (HSP 75) (TNFR-associated protein 1) (Tumor necrosis factor type 1 receptor-associated protein) (TRAP-1)	TRAP1
Q58FF6|H90B4_HUMAN	5	0	247.84	6.66721e-06	8.90794e-05	2.32723	1	Probe	Control	Q58FF6	Putative heat shock protein HSP 90-beta 4	HSP90AB4P
F8W7Q4|F8W7Q4_HUMAN;E9PH05|E9PH05_HUMAN	2	2	110.84	0.033946	0.0509696	2.32315	0.601178	Probe	Control	F8W7Q4	Protein FAM162A	FAM162A
Q96AG4|LRC59_HUMAN;I3L223|I3L223_HUMAN	8	8	419.87	0.00700205	0.0159284	2.3165	0.860464	Probe	Control	Q96AG4	Leucine-rich repeat-containing protein 59 (Ribosome-binding protein p34) (p34) [Cleaved into: Leucine-rich repeat-containing protein 59, N-terminally processed]	LRRC59
P42126|ECI1_HUMAN;Q96DC0|Q96DC0_HUMAN;H3BS70|H3BS70_HUMAN	5	5	188.1	0.0165892	0.0305111	2.31005	0.735604	Probe	Control	P42126	Enoyl-CoA delta isomerase 1, mitochondrial (EC 5.3.3.8) (3,2-trans-enoyl-CoA isomerase) (Delta(3),Delta(2)-enoyl-CoA isomerase) (D3,D2-enoyl-CoA isomerase) (Dodecenoyl-CoA isomerase)	ECI1
P09382|LEG1_HUMAN	6	6	411.52	0.0160096	0.0298075	2.30867	0.741635	Probe	Control	P09382	Galectin-1 (Gal-1) (14 kDa laminin-binding protein) (HLBP14) (14 kDa lectin) (Beta-galactoside-binding lectin L-14-I) (Galaptin) (HBL) (HPL) (Lactose-binding lectin 1) (Lectin galactoside-binding soluble 1) (Putative MAPK-activating protein PM12) (S-Lac lectin 1)	LGALS1
P11142|HSP7C_HUMAN;E9PKE3|E9PKE3_HUMAN;E9PN89|E9PN89_HUMAN;E9PNE6|E9PNE6_HUMAN;E9PLF4|E9PLF4_HUMAN;E9PK54|E9PK54_HUMAN;A8K7Q2|A8K7Q2_HUMAN;E9PI65|E9PI65_HUMAN;E9PPY6|E9PPY6_HUMAN;E9PN25|E9PN25_HUMAN;P54652|HSP72_HUMAN;E9PS65|E9PS65_HUMAN;E9PM13|E9PM13_HUMAN	27	22	2153.07	8.49458e-07	2.2855e-05	2.3058	1	Probe	Control	P11142	Heat shock cognate 71 kDa protein (Heat shock 70 kDa protein 8) (Lipopolysaccharide-associated protein 1) (LAP-1) (LPS-associated protein 1)	HSPA8
A0A140T9T7|A0A140T9T7_HUMAN;A0A0S2Z4R8|A0A0S2Z4R8_HUMAN	12	12	582.17	0.00164461	0.0053503	2.304	0.969294	Probe	Control	A0A140T9T7	Antigen peptide transporter 1	TAP1
Q8IV08|PLD3_HUMAN;M0R1F7|M0R1F7_HUMAN;E2QRG1|E2QRG1_HUMAN;M0R3G9|M0R3G9_HUMAN	6	5	246	0.000195856	0.000987357	2.30171	0.999165	Probe	Control	Q8IV08	Phospholipase D3 (PLD 3) (EC 3.1.4.4) (Choline phosphatase 3) (HindIII K4L homolog) (Hu-K4) (Phosphatidylcholine-hydrolyzing phospholipase D3)	PLD3
P04075|ALDOA_HUMAN;H3BQN4|H3BQN4_HUMAN;J3KPS3|J3KPS3_HUMAN;H3BPS8|H3BPS8_HUMAN;H3BR04|H3BR04_HUMAN;H3BUH7|H3BUH7_HUMAN;H3BMQ8|H3BMQ8_HUMAN;H3BU78|H3BU78_HUMAN;H3BR68|H3BR68_HUMAN;A0A087WXX2|A0A087WXX2_HUMAN	21	16	1354.89	1.82006e-05	0.000183553	2.29406	0.999999	Probe	Control	P04075	Fructose-bisphosphate aldolase A (EC 4.1.2.13) (Lung cancer antigen NY-LU-1) (Muscle-type aldolase)	ALDOA
Q9UIQ6|LCAP_HUMAN	3	3	123.98	0.00283558	0.00824909	2.27097	0.941623	Probe	Control	Q9UIQ6	Leucyl-cystinyl aminopeptidase (Cystinyl aminopeptidase) (EC 3.4.11.3) (Insulin-regulated membrane aminopeptidase) (Insulin-responsive aminopeptidase) (IRAP) (Oxytocinase) (OTase) (Placental leucine aminopeptidase) (P-LAP) [Cleaved into: Leucyl-cystinyl aminopeptidase, pregnancy serum form]	LNPEP
Q07065|CKAP4_HUMAN	24	24	1880.47	0.00620208	0.0144342	2.26735	0.874261	Probe	Control	Q07065	Cytoskeleton-associated protein 4 (63-kDa cytoskeleton-linking membrane protein) (Climp-63) (p63)	CKAP4
F8VVM2|F8VVM2_HUMAN;F8VWQ0|F8VWQ0_HUMAN;F8VWR4|F8VWR4_HUMAN	9	1	351.24	0.000927885	0.00332227	2.26491	0.985989	Probe	Control	F8VVM2	Phosphate carrier protein, mitochondrial	SLC25A3
P43034|LIS1_HUMAN;I3L3N5|I3L3N5_HUMAN;I3L495|I3L495_HUMAN	3	3	162.84	0.00173627	0.00561828	2.26075	0.967123	Probe	Control	P43034	Platelet-activating factor acetylhydrolase IB subunit alpha (Lissencephaly-1 protein) (LIS-1) (PAF acetylhydrolase 45 kDa subunit) (PAF-AH 45 kDa subunit) (PAF-AH alpha) (PAFAH alpha)	PAFAH1B1
P14625|ENPL_HUMAN;A0A1W2PRR1|A0A1W2PRR1_HUMAN;H0YIV0|H0YIV0_HUMAN;Q58FF3|ENPLL_HUMAN;F8W026|F8W026_HUMAN;F8VPC7|F8VPC7_HUMAN	29	27	1651.81	0.000152912	0.000870727	2.25993	0.999522	Probe	Control	P14625	Endoplasmin (94 kDa glucose-regulated protein) (GRP-94) (Heat shock protein 90 kDa beta member 1) (Tumor rejection antigen 1) (gp96 homolog)	HSP90B1
P05141|ADT2_HUMAN	14	5	942.14	0.00319468	0.00899472	2.25339	0.933638	Probe	Control	P05141	ADP/ATP translocase 2 (ADP,ATP carrier protein 2) (ADP,ATP carrier protein, fibroblast isoform) (Adenine nucleotide translocator 2) (ANT 2) (Solute carrier family 25 member 5) [Cleaved into: ADP/ATP translocase 2, N-terminally processed]	SLC25A5
I3L397|I3L397_HUMAN;Q6IS14|IF5AL_HUMAN;C9J4W5|C9J4W5_HUMAN	6	5	206.05	0.0217431	0.037166	2.23268	0.687533	Probe	Control	I3L397	Eukaryotic translation initiation factor 5A (eIF-5A) (Fragment)	EIF5A
F8VZX2|F8VZX2_HUMAN;F8VXH9|F8VXH9_HUMAN;E9PFP8|E9PFP8_HUMAN;F8VRH0|F8VRH0_HUMAN;F8W1G6|F8W1G6_HUMAN;H3BND9|H3BND9_HUMAN;H3BSS4|H3BSS4_HUMAN	5	3	287.7	4.01617e-06	6.07547e-05	2.22969	1	Probe	Control	F8VZX2	Poly(rC)-binding protein 2	PCBP2
E9PP50|E9PP50_HUMAN;E9PK25|E9PK25_HUMAN;E9PQB7|E9PQB7_HUMAN;E9PLJ3|E9PLJ3_HUMAN;E9PS23|E9PS23_HUMAN;Q9Y281|COF2_HUMAN	8	8	569.36	0.0055984	0.0135504	2.22861	0.885179	Probe	Control	E9PP50	Cofilin-1 (Fragment)	CFL1
P50454|SERPH_HUMAN;E9PPV6|E9PPV6_HUMAN;E9PR70|E9PR70_HUMAN;E9PK86|E9PK86_HUMAN;E9PKH2|E9PKH2_HUMAN;E9PNX1|E9PNX1_HUMAN;E9PIG2|E9PIG2_HUMAN;E9PQ34|E9PQ34_HUMAN;E9PLA6|E9PLA6_HUMAN;H0YEP8|H0YEP8_HUMAN	15	15	940.29	0.00157804	0.0052179	2.22505	0.970871	Probe	Control	P50454	Serpin H1 (47 kDa heat shock protein) (Arsenic-transactivated protein 3) (AsTP3) (Cell proliferation-inducing gene 14 protein) (Collagen-binding protein) (Colligin) (Rheumatoid arthritis-related antigen RA-A47)	SERPINH1
P04843|RPN1_HUMAN;B7Z4L4|B7Z4L4_HUMAN;F8WF32|F8WF32_HUMAN	17	17	727.73	0.00200979	0.00623655	2.20733	0.960664	Probe	Control	P04843	Dolichyl-diphosphooligosaccharide--protein glycosyltransferase subunit 1 (Dolichyl-diphosphooligosaccharide--protein glycosyltransferase 67 kDa subunit) (Ribophorin I) (RPN-I) (Ribophorin-1)	RPN1
P38919|IF4A3_HUMAN	3	1	226.67	0.00285601	0.00826877	2.20646	0.941164	Probe	Control	P38919	Eukaryotic initiation factor 4A-III (eIF-4A-III) (eIF4A-III) (EC 3.6.4.13) (ATP-dependent RNA helicase DDX48) (ATP-dependent RNA helicase eIF4A-3) (DEAD box protein 48) (Eukaryotic initiation factor 4A-like NUK-34) (Eukaryotic translation initiation factor 4A isoform 3) (Nuclear matrix protein 265) (NMP 265) (hNMP 265) [Cleaved into: Eukaryotic initiation factor 4A-III, N-terminally processed]	EIF4A3
A0A0A0MSQ0|A0A0A0MSQ0_HUMAN;H7C4N2|H7C4N2_HUMAN;P13796|PLSL_HUMAN;Q14651|PLSI_HUMAN;U3KQI3|U3KQI3_HUMAN;Q5TBN3|Q5TBN3_HUMAN;C9JAM8|C9JAM8_HUMAN	12	12	627.85	0.00248273	0.00736424	2.20553	0.949653	Probe	Control	A0A0A0MSQ0	Plastin-3	PLS3
M0R210|M0R210_HUMAN;M0R3H0|M0R3H0_HUMAN;M0QX76|M0QX76_HUMAN;Q6IPX4|Q6IPX4_HUMAN	7	7	316.39	0.00604939	0.0141879	2.19963	0.87698	Probe	Control	M0R210	40S ribosomal protein S16 (Ribosomal protein S16, isoform CRA_a)	RPS16
Q15365|PCBP1_HUMAN;F8VTZ0|F8VTZ0_HUMAN	7	5	349.47	1.1555e-05	0.000127126	2.19296	1	Probe	Control	Q15365	Poly(rC)-binding protein 1 (Alpha-CP1) (Heterogeneous nuclear ribonucleoprotein E1) (hnRNP E1) (Nucleic acid-binding protein SUB2.3)	PCBP1
A0A024R4E5|A0A024R4E5_HUMAN;Q00341|VIGLN_HUMAN;C9J5E5|C9J5E5_HUMAN;H0Y394|H0Y394_HUMAN;C9JMQ6|C9JMQ6_HUMAN;H7C0A4|H7C0A4_HUMAN	4	4	203.16	0.00428486	0.0109863	2.19139	0.910609	Probe	Control	A0A024R4E5	High density lipoprotein binding protein (Vigilin), isoform CRA_a (Vigilin)	HDLBP
F5H365|F5H365_HUMAN;A0A2R8YFH5|A0A2R8YFH5_HUMAN;G3V1W4|G3V1W4_HUMAN	4	4	195.17	0.0312405	0.0477365	2.19122	0.617848	Probe	Control	F5H365	Protein transport protein SEC23	SEC23A
P04406|G3P_HUMAN;E7EUT5|E7EUT5_HUMAN;O14556|G3PT_HUMAN	19	18	1394.29	0.000197438	0.000987357	2.18721	0.99915	Probe	Control	P04406	Glyceraldehyde-3-phosphate dehydrogenase (GAPDH) (EC 1.2.1.12) (Peptidyl-cysteine S-nitrosylase GAPDH) (EC 2.6.99.-)	GAPDH
P21964|COMT_HUMAN;E7EMS6|E7EMS6_HUMAN;E7EUU8|E7EUU8_HUMAN	4	4	223.18	0.0185739	0.0331009	2.18486	0.715984	Probe	Control	P21964	Catechol O-methyltransferase (EC 2.1.1.6)	COMT
O95373|IPO7_HUMAN;E9PLB2|E9PLB2_HUMAN	4	4	272.43	0.00225055	0.00684325	2.18206	0.955028	Probe	Control	O95373	Importin-7 (Imp7) (Ran-binding protein 7) (RanBP7)	IPO7
V9GYS0|V9GYS0_HUMAN;V9GYU0|V9GYU0_HUMAN	2	2	190.32	0.0158273	0.0297299	2.1674	0.743563	Probe	Control	V9GYS0	Mitochondrial import inner membrane translocase subunit Tim17-B	TIMM17B
Q9BU23|LMF2_HUMAN	2	2	100.92	0.0205016	0.0355625	2.15759	0.698295	Probe	Control	Q9BU23	Lipase maturation factor 2 (Transmembrane protein 112B) (Transmembrane protein 153)	LMF2
A0A2R8Y478|A0A2R8Y478_HUMAN	2	2	152.33	0.000409217	0.00171914	2.15746	0.996354	Probe	Control	A0A2R8Y478	Tetraspanin	CD9
P25705|ATPA_HUMAN;K7EK77|K7EK77_HUMAN;K7ERX7|K7ERX7_HUMAN;K7EJP1|K7EJP1_HUMAN;K7ENJ4|K7ENJ4_HUMAN;K7EQH4|K7EQH4_HUMAN;K7ESA0|K7ESA0_HUMAN	19	18	1288.44	0.00216411	0.00668115	2.15051	0.957044	Probe	Control	P25705	ATP synthase subunit alpha, mitochondrial (ATP synthase F1 subunit alpha)	ATP5F1A
Q8NCH0|CHSTE_HUMAN;H0YN65|H0YN65_HUMAN	2	1	56.79	4.09118e-05	0.000325734	2.14437	0.999987	Probe	Control	Q8NCH0	Carbohydrate sulfotransferase 14 (EC 2.8.2.35) (Dermatan 4-sulfotransferase 1) (D4ST-1) (hD4ST1)	CHST14
P00338|LDHA_HUMAN;F5GXY2|F5GXY2_HUMAN;F5GYU2|F5GYU2_HUMAN;F5GXH2|F5GXH2_HUMAN;F5GZQ4|F5GZQ4_HUMAN;A0A087WUM2|A0A087WUM2_HUMAN;F5GWW2|F5GWW2_HUMAN;Q9BYZ2|LDH6B_HUMAN	13	12	705.93	0.000266146	0.00126807	2.14403	0.998406	Probe	Control	P00338	L-lactate dehydrogenase A chain (LDH-A) (EC 1.1.1.27) (Cell proliferation-inducing gene 19 protein) (LDH muscle subunit) (LDH-M) (Renal carcinoma antigen NY-REN-59)	LDHA
O43169|CYB5B_HUMAN;A0A499FJ32|A0A499FJ32_HUMAN;D6RFH4|D6RFH4_HUMAN;J3QR91|J3QR91_HUMAN	5	5	385.21	0.007852	0.0175226	2.14377	0.846569	Probe	Control	O43169	Cytochrome b5 type B (Cytochrome b5 outer mitochondrial membrane isoform)	CYB5B
Q99536|VAT1_HUMAN;K7EM19|K7EM19_HUMAN;K7ERT7|K7ERT7_HUMAN;K7EJM4|K7EJM4_HUMAN;K7ER81|K7ER81_HUMAN;K7ESA3|K7ESA3_HUMAN	5	5	230.86	0.0114643	0.0233803	2.13172	0.79471	Probe	Control	Q99536	Synaptic vesicle membrane protein VAT-1 homolog (EC 1.-.-.-)	VAT1
Q9UJS0|CMC2_HUMAN;O75746|CMC1_HUMAN	3	3	100.01	0.00370956	0.0098962	2.1311	0.922535	Probe	Control	Q9UJS0	Calcium-binding mitochondrial carrier protein Aralar2 (Citrin) (Mitochondrial aspartate glutamate carrier 2) (Solute carrier family 25 member 13)	SLC25A13
Q14974|IMB1_HUMAN;J3KTM9|J3KTM9_HUMAN;J3QKQ5|J3QKQ5_HUMAN;J3QR48|J3QR48_HUMAN	18	18	898.48	0.000679284	0.00253726	2.12815	0.991329	Probe	Control	Q14974	Importin subunit beta-1 (Importin-90) (Karyopherin subunit beta-1) (Nuclear factor p97) (Pore targeting complex 97 kDa subunit) (PTAC97)	KPNB1
O00232|PSD12_HUMAN	3	3	100.15	0.0284025	0.0444093	2.12547	0.636669	Probe	Control	O00232	26S proteasome non-ATPase regulatory subunit 12 (26S proteasome regulatory subunit RPN5) (26S proteasome regulatory subunit p55)	PSMD12
P25398|RS12_HUMAN	5	5	178.52	0.0127954	0.0255529	2.12201	0.777983	Probe	Control	P25398	40S ribosomal protein S12 (Small ribosomal subunit protein eS12)	RPS12
P60174|TPIS_HUMAN;U3KPZ0|U3KPZ0_HUMAN;U3KQF3|U3KQF3_HUMAN;U3KPS5|U3KPS5_HUMAN	14	14	1004.38	2.77413e-05	0.000258251	2.12181	0.999996	Probe	Control	P60174	Triosephosphate isomerase (TIM) (EC 5.3.1.1) (Methylglyoxal synthase) (EC 4.2.3.3) (Triose-phosphate isomerase)	TPI1
P30048|PRDX3_HUMAN	6	6	228.61	0.00105237	0.00368088	2.11764	0.983177	Probe	Control	P30048	Thioredoxin-dependent peroxide reductase, mitochondrial (EC 1.11.1.15) (Antioxidant protein 1) (AOP-1) (HBC189) (Peroxiredoxin III) (Prx-III) (Peroxiredoxin-3) (Protein MER5 homolog)	PRDX3
B8ZZA8|B8ZZA8_HUMAN;B8ZZC5|B8ZZC5_HUMAN	3	2	168.16	0.00103791	0.00365139	2.10928	0.983507	Probe	Control	B8ZZA8	Glutaminase kidney isoform, mitochondrial	GLS
A0A087WUL9|A0A087WUL9_HUMAN	3	3	61.27	0.0053309	0.0130934	2.10717	0.890166	Probe	Control	A0A087WUL9	26S proteasome non-ATPase regulatory subunit 13	PSMD13
Q96N66|MBOA7_HUMAN	3	3	156.25	0.00050975	0.00200292	2.10698	0.994619	Probe	Control	Q96N66	Lysophospholipid acyltransferase 7 (LPLAT 7) (EC 2.3.1.-) (1-acylglycerophosphatidylinositol O-acyltransferase) (EC 2.3.1.n4) (Bladder and breast carcinoma-overexpressed gene 1 protein) (Leukocyte receptor cluster member 4) (Lysophosphatidylinositol acyltransferase) (LPIAT) (Lyso-PI acyltransferase) (Membrane-bound O-acyltransferase domain-containing protein 7) (O-acyltransferase domain-containin…	MBOAT7
A0A0U1RRM4|A0A0U1RRM4_HUMAN;K7EK45|K7EK45_HUMAN;K7EKJ7|K7EKJ7_HUMAN;A0A087WU68|A0A087WU68_HUMAN;K7ES59|K7ES59_HUMAN;K7ELW5|K7ELW5_HUMAN	5	5	455.31	0.0490881	0.0695627	2.10567	0.524919	Probe	Control	A0A0U1RRM4	Polypyrimidine tract-binding protein 1	PTBP1
E7ESS4|E7ESS4_HUMAN	2	2	77.42	0.0443382	0.063944	2.09323	0.546255	Probe	Control	E7ESS4	Intercellular adhesion molecule 1	ICAM1
D6REX3|D6REX3_HUMAN;H0Y9T9|H0Y9T9_HUMAN;H7BXG7|H7BXG7_HUMAN	3	3	141.58	0.0184644	0.0330558	2.0904	0.717026	Probe	Control	D6REX3	Protein transport protein Sec31A	SEC31A
A0A0U1RQF0|A0A0U1RQF0_HUMAN	11	10	494.37	0.0153286	0.0296338	2.08645	0.748911	Probe	Control	A0A0U1RQF0	Fatty acid synthase	FASN
Q96D15|RCN3_HUMAN;M0QZH0|M0QZH0_HUMAN;M0QYB8|M0QYB8_HUMAN	5	5	404.79	0.0294586	0.0457278	2.06627	0.629493	Probe	Control	Q96D15	Reticulocalbin-3 (EF-hand calcium-binding protein RLP49)	RCN3
P12004|PCNA_HUMAN	6	6	285.38	3.84198e-05	0.000318464	2.06571	0.999989	Probe	Control	P12004	Proliferating cell nuclear antigen (PCNA) (Cyclin)	PCNA
P26641|EF1G_HUMAN	15	15	886.68	0.00270818	0.00791652	2.05608	0.944502	Probe	Control	P26641	Elongation factor 1-gamma (EF-1-gamma) (eEF-1B gamma)	EEF1G
A0A087X1Z3|A0A087X1Z3_HUMAN;H0YM70|H0YM70_HUMAN;H0YKU2|H0YKU2_HUMAN;H0YLD2|H0YLD2_HUMAN	8	8	384.63	3.71523e-05	0.000312235	2.0519	0.99999	Probe	Control	A0A087X1Z3	Proteasome activator complex subunit 2	PSME2
P07737|PROF1_HUMAN;K7EJ44|K7EJ44_HUMAN;I3L3D5|I3L3D5_HUMAN	6	6	408.99	0.000979725	0.00348725	2.05184	0.984826	Probe	Control	P07737	Profilin-1 (Epididymis tissue protein Li 184a) (Profilin I)	PFN1
Q9Y6K5|OAS3_HUMAN;F8VS35|F8VS35_HUMAN;F8VWK9|F8VWK9_HUMAN;H0YHL3|H0YHL3_HUMAN	21	20	814.71	0.000400042	0.00170469	2.0354	0.996502	Probe	Control	Q9Y6K5	2'-5'-oligoadenylate synthase 3 ((2-5')oligo(A) synthase 3) (2-5A synthase 3) (EC 2.7.7.84) (p100 OAS) (p100OAS)	OAS3
Q5JR08|Q5JR08_HUMAN;C9JNR4|C9JNR4_HUMAN;U3KQA9|U3KQA9_HUMAN;E9PLA2|E9PLA2_HUMAN	5	5	203.04	0.025123	0.0408655	2.03525	0.660405	Probe	Control	Q5JR08	Rho-related GTP-binding protein RhoC (Fragment)	RHOC
P25788|PSA3_HUMAN;G3V4X5|G3V4X5_HUMAN	2	2	112.65	0.00905254	0.019704	2.03422	0.82814	Probe	Control	P25788	Proteasome subunit alpha type-3 (EC 3.4.25.1) (Macropain subunit C8) (Multicatalytic endopeptidase complex subunit C8) (Proteasome component C8)	PSMA3
P30050|RL12_HUMAN	5	5	340.17	0.00367756	0.0098962	2.0303	0.923213	Probe	Control	P30050	60S ribosomal protein L12 (Large ribosomal subunit protein uL11)	RPL12
F5H0C8|F5H0C8_HUMAN;F5H1C3|F5H1C3_HUMAN	3	0	323.26	2.14918e-07	1.84781e-05	2.02556	1	Probe	Control	F5H0C8	Gamma-enolase	ENO2
P00505|AATM_HUMAN	6	5	287.71	0.00200366	0.00623655	2.02455	0.960808	Probe	Control	P00505	Aspartate aminotransferase, mitochondrial (mAspAT) (EC 2.6.1.1) (EC 2.6.1.7) (Fatty acid-binding protein) (FABP-1) (Glutamate oxaloacetate transaminase 2) (Kynurenine aminotransferase 4) (Kynurenine aminotransferase IV) (Kynurenine--oxoglutarate transaminase 4) (Kynurenine--oxoglutarate transaminase IV) (Plasma membrane-associated fatty acid-binding protein) (FABPpm) (Transaminase A)	GOT2
G3V295|G3V295_HUMAN;G3V3I1|G3V3I1_HUMAN	5	5	233.34	0.0243126	0.0399771	2.02447	0.666644	Probe	Control	G3V295	Proteasome subunit alpha type (EC 3.4.25.1)	PSMA6
D6R9P3|D6R9P3_HUMAN;Q99729|ROAA_HUMAN	5	4	184.91	0.012661	0.0254525	2.01742	0.779622	Probe	Control	D6R9P3	Heterogeneous nuclear ribonucleoprotein A/B	HNRNPAB
P00813|ADA_HUMAN;F5GWI4|F5GWI4_HUMAN;F5GXW0|F5GXW0_HUMAN	2	2	46.35	0.00589343	0.0139374	2.01481	0.879787	Probe	Control	P00813	Adenosine deaminase (EC 3.5.4.4) (Adenosine aminohydrolase)	ADA
P50990|TCPQ_HUMAN;H7C4C8|H7C4C8_HUMAN;H7C2U0|H7C2U0_HUMAN	6	6	228.56	0.0246858	0.0402626	2.01295	0.663751	Probe	Control	P50990	T-complex protein 1 subunit theta (TCP-1-theta) (CCT-theta) (Chaperonin containing T-complex polypeptide 1 subunit 8) (Renal carcinoma antigen NY-REN-15)	CCT8
K7ELL7|K7ELL7_HUMAN;A0A0C4DGP4|A0A0C4DGP4_HUMAN	5	5	225.06	0.012731	0.0255085	2.00868	0.778767	Probe	Control	K7ELL7	Glucosidase 2 subunit beta	PRKCSH
P27797|CALR_HUMAN;K7EJB9|K7EJB9_HUMAN;K7EL50|K7EL50_HUMAN	16	16	974.06	0.00161844	0.00529363	2.00173	0.969914	Probe	Control	P27797	Calreticulin (CRP55) (Calregulin) (Endoplasmic reticulum resident protein 60) (ERp60) (HACBP) (grp60)	CALR

## Sheet: Probe vs Competition
Supplementary Excel S2: Results of Potential Targets by Statistical Analysis (Probe/Competition)
Total proteins count:36
Accession	Peptide count	Unique peptides	Confidence score	Anova (p)	q Value	Max fold change	Power	Highest mean condition	Lowest mean condition	Probe/Competition	Protein names	Gene names
A0A286YFL6|A0A286YFL6_HUMAN	2	1	90.94	0.000549057	0.00219135	37.7204	0.996175	Probe	Competition	A0A286YFL6	Palmitoyl-protein thioesterase 1 (Fragment)	PPT1
A0A2R8YGD1|A0A2R8YGD1_HUMAN;A0A2R8Y7U1|A0A2R8Y7U1_HUMAN;A0A2R8YD45|A0A2R8YD45_HUMAN;A0A2R8Y7I4|A0A2R8Y7I4_HUMAN;A0A2R8YD72|A0A2R8YD72_HUMAN;A0A2R8YDY1|A0A2R8YDY1_HUMAN	5	5	299.47	1.74036e-06	0.000228198	7.92519	1	Probe	Competition	A0A2R8YGD1	Tripeptidyl-peptidase 1	TPP1
C9JIZ6|C9JIZ6_HUMAN;Q5BJH1|Q5BJH1_HUMAN;A0A0J9YXB8|A0A0J9YXB8_HUMAN	17	17	926.75	0.00108073	0.002997	4.72369	0.987326	Probe	Competition	C9JIZ6	Prosaposin	PSAP
P23490|LORI_HUMAN	1	1	34.23	0.00745742	0.00982802	4.2402	0.865224	Probe	Competition	P23490	Loricrin	LOR LRN
A0A286YFF7|A0A286YFF7_HUMAN;A0A286YFE3|A0A286YFE3_HUMAN;E9PIA8|E9PIA8_HUMAN;E9PK48|E9PK48_HUMAN;E9PSE5|E9PSE5_HUMAN	6	5	374.21	0.0144157	0.0153429	4.07059	0.770676	Probe	Competition	A0A286YFF7	Palmitoyl-protein thioesterase 1	PPT1
P07711|CATL1_HUMAN	1	1	43.36	0.0035991	0.00620115	4.01414	0.935342	Probe	Competition	P07711	Cathepsin L1 (EC 3.4.22.15) (Cathepsin L) (Major excreted protein) (MEP) [Cleaved into: Cathepsin L1 heavy chain; Cathepsin L1 light chain]	CTSL CTSL1
P45974|UBP5_HUMAN	3	3	120.74	0.00980979	0.0117162	3.54065	0.829482	Probe	Competition	P45974	Ubiquitin carboxyl-terminal hydrolase 5 (EC 3.4.19.12) (Deubiquitinating enzyme 5) (Isopeptidase T) (Ubiquitin thioesterase 5) (Ubiquitin-specific-processing protease 5)	USP5 ISOT
Q06481|APLP2_HUMAN	2	2	70.02	0.0123026	0.0139908	3.41123	0.796078	Probe	Competition	Q06481	Amyloid-like protein 2 (APLP-2) (APPH) (Amyloid protein homolog) (CDEI box-binding protein) (CDEBP)	APLP2 APPL2
A0A0C4DGI3|A0A0C4DGI3_HUMAN;H0YIC4|H0YIC4_HUMAN;F8VPA1|F8VPA1_HUMAN	7	6	255.79	0.00602415	0.00852722	3.38846	0.889441	Probe	Competition	A0A0C4DGI3	Citrate synthase	CS
A0A1B0GVD5|A0A1B0GVD5_HUMAN;A0A1B0GVP3|A0A1B0GVP3_HUMAN;A0A1B0GV23|A0A1B0GV23_HUMAN;A0A1B0GU03|A0A1B0GU03_HUMAN;H7C469|H7C469_HUMAN;C9JH19|C9JH19_HUMAN;F8WD96|F8WD96_HUMAN;H7C1V0|H7C1V0_HUMAN;F8W787|F8W787_HUMAN;A0A1B0GV01|A0A1B0GV01_HUMAN;A0A1B0GVF1|A0A1B0GVF1_HUMAN	16	16	1274.87	7.07188e-05	0.000941806	3.16259	0.999981	Probe	Competition	A0A1B0GVD5	Cathepsin D	CTSD
E9PS44|E9PS44_HUMAN;E9PQN9|E9PQN9_HUMAN	4	4	398.65	0.0381137	0.0318848	2.87071	0.584921	Probe	Competition	E9PS44	Interferon-induced transmembrane protein 3	IFITM3
P69905|HBA_HUMAN;A0A2R8Y7C0|A0A2R8Y7C0_HUMAN;G3V1N2|G3V1N2_HUMAN;P02008|HBAZ_HUMAN	5	5	265.84	0.03403	0.0294978	2.754	0.608638	Probe	Competition	P69905	Hemoglobin subunit alpha (Alpha-globin) (Hemoglobin alpha chain)	HBA1; HBA2
C9JZR2|C9JZR2_HUMAN;E9PKY0|E9PKY0_HUMAN;H0YC95|H0YC95_HUMAN	4	4	122.73	0.000924494	0.00277616	2.75109	0.990192	Probe	Competition	C9JZR2	Catenin delta-1	CTNND1
P17844|DDX5_HUMAN;J3KRZ1|J3KRZ1_HUMAN;J3QSF1|J3QSF1_HUMAN;J3QRQ7|J3QRQ7_HUMAN;A0A0U1RQJ0|A0A0U1RQJ0_HUMAN;J3KRX8|J3KRX8_HUMAN	12	7	422.11	0.00476457	0.00744629	2.70896	0.912479	Probe	Competition	P17844	Probable ATP-dependent RNA helicase DDX5 (EC 3.6.4.13) (DEAD box protein 5) (RNA helicase p68)	DDX5 G17P1 HELR HLR1
Q9HAV4|XPO5_HUMAN;H0Y9I3|H0Y9I3_HUMAN	2	1	41.74	0.0044959	0.00715946	2.68367	0.917618	Probe	Competition	Q9HAV4	Exportin-5 (Exp5) (Ran-binding protein 21)	XPO5 KIAA1291 RANBP21
K7EJE8|K7EJE8_HUMAN;K7ER27|K7ER27_HUMAN	2	2	87.69	0.0126493	0.014157	2.67172	0.79174	Probe	Competition	K7EJE8	Lon protease homolog, mitochondrial (EC 3.4.21.53) (Lon protease-like protein) (LONP) (Mitochondrial ATP-dependent protease Lon) (Serine protease 15)	LONP1
H0Y8D1|H0Y8D1_HUMAN;A6XGL3|A6XGL3_HUMAN;A0A0J9YYC8|A0A0J9YYC8_HUMAN	6	6	274.91	0.00131451	0.00332909	2.66441	0.982793	Probe	Competition	H0Y8D1	Trypsin-1 (Fragment)	PRSS1
E9PRG8|CK098_HUMAN;A0A494BXY3|A0A494BXY3_HUMAN	4	4	157.15	0.00416857	0.00679908	2.59561	0.923986	Probe	Competition	E9PRG8	Uncharacterized protein C11orf98	C11orf98
E5RJH0|E5RJH0_HUMAN	1	1	48.82	0.00103699	0.00291282	2.59445	0.988144	Probe	Competition	E5RJH0	Betaine--homocysteine S-methyltransferase 1	BHMT
P02042|HBD_HUMAN;A0A2R8Y7R2|A0A2R8Y7R2_HUMAN;A0A2R8Y7X9|A0A2R8Y7X9_HUMAN	4	4	216.65	0.00112084	0.00304006	2.42473	0.986566	Probe	Competition	P02042	Hemoglobin subunit delta (Delta-globin) (Hemoglobin delta chain)	HBD
A0A087WWW9|A0A087WWW9_HUMAN	1	1	34.23	0.00101456	0.00290153	2.42252	0.988559	Probe	Competition	A0A087WWW9	B-cell lymphoma/leukemia 10	BCL10
P31327|CPSM_HUMAN;Q5R211|Q5R211_HUMAN;F8VPD4|F8VPD4_HUMAN	14	14	446.55	0.00058907	0.00221114	2.39742	0.995621	Probe	Competition	P31327	Carbamoyl-phosphate synthase [ammonia], mitochondrial (EC 6.3.4.16) (Carbamoyl-phosphate synthetase I) (CPSase I)	CPS1
A0A0A6YYJ8|A0A0A6YYJ8_HUMAN;B8ZZ12|B8ZZ12_HUMAN	5	3	190.46	0.00986465	0.0117483	2.37226	0.828701	Probe	Competition	A0A0A6YYJ8	Putative RNA-binding protein Luc7-like 2	LUC7L2
Q7Z589|EMSY_HUMAN	1	1	41.62	0.025017	0.0233199	2.35253	0.670764	Probe	Competition	Q7Z589	BRCA2-interacting transcriptional repressor EMSY	EMSY C11orf30 GL002
P22087|FBRL_HUMAN;M0QXL5|M0QXL5_HUMAN;M0R1H0|M0R1H0_HUMAN;A6NHQ2|FBLL1_HUMAN	4	4	237.34	0.00757171	0.00991647	2.34525	0.863378	Probe	Competition	P22087	rRNA 2'-O-methyltransferase fibrillarin (EC 2.1.1.-) (34 kDa nucleolar scleroderma antigen) (Histone-glutamine methyltransferase)	FBL FIB1 FLRN
H7BYN3|H7BYN3_HUMAN	2	2	59.66	0.0218397	0.0208198	2.32767	0.696894	Probe	Competition	H7BYN3	Transcription factor A, mitochondrial (Fragment)	TFAM
A0A2R8Y4P5|A0A2R8Y4P5_HUMAN	1	0	34.61	0.000980108	0.00284167	2.31797	0.98919	Probe	Competition	A0A2R8Y4P5	Required for meiotic nuclear division protein 1 homolog (Fragment)	RMND1
A0A075B6Z2|A0A075B6Z2_HUMAN	1	0	34.25	0.000980108	0.00284167	2.31797	0.98919	Probe	Competition	A0A075B6Z2	T cell receptor alpha joining 56 (Fragment)	TRAJ56
Q9HD45|TM9S3_HUMAN;Q5TB53|Q5TB53_HUMAN	13	13	583.13	0.00497143	0.0076278	2.21076	0.908577	Probe	Competition	Q9HD45	Transmembrane 9 superfamily member 3 (EP70-P-iso) (SM-11044-binding protein)	TM9SF3 SMBP UNQ245/PRO282
P07858|CATB_HUMAN;R4GMQ5|R4GMQ5_HUMAN;E9PCB3|E9PCB3_HUMAN	5	5	356.13	0.00689008	0.00916653	2.19969	0.874569	Probe	Competition	P07858	Cathepsin B (EC 3.4.22.1) (APP secretase) (APPS) (Cathepsin B1) [Cleaved into: Cathepsin B light chain; Cathepsin B heavy chain]	CTSB CPSB
P16278|BGAL_HUMAN;E7EQ29|E7EQ29_HUMAN;C9J4G9|C9J4G9_HUMAN;C9J539|C9J539_HUMAN;C9JF15|C9JF15_HUMAN	6	6	232.1	0.00780611	0.0101176	2.18344	0.859629	Probe	Competition	P16278	Beta-galactosidase (EC 3.2.1.23) (Acid beta-galactosidase) (Lactase) (Elastin receptor 1)	GLB1 ELNR1
P42285|MTREX_HUMAN;H0YAC4|H0YAC4_HUMAN	2	2	65.64	0.00918647	0.0112824	2.11727	0.838514	Probe	Competition	P42285	Exosome RNA helicase MTR4 (EC 3.6.4.13) (ATP-dependent RNA helicase DOB1) (ATP-dependent RNA helicase SKIV2L2) (Superkiller viralicidic activity 2-like 2) (TRAMP-like complex helicase)	MTREX DOB1 KIAA0052 MTR4 SKIV2L2
Q13085|ACACA_HUMAN;Q59FY4|Q59FY4_HUMAN;O00763|ACACB_HUMAN;A0A087WYK6|A0A087WYK6_HUMAN;A0A087WYS8|A0A087WYS8_HUMAN;F8W8T8|F8W8T8_HUMAN	26	26	1291.1	0.000303718	0.00163825	2.10562	0.998902	Probe	Competition	Q13085	Acetyl-CoA carboxylase 1 (ACC1) (EC 6.4.1.2) (Acetyl-Coenzyme A carboxylase alpha) (ACC-alpha) [Includes: Biotin carboxylase (EC 6.3.4.14)]	ACACA ACAC ACC1 ACCA
P26373|RL13_HUMAN;J3QSB4|J3QSB4_HUMAN;H3BTH3|H3BTH3_HUMAN;H3BUK8|H3BUK8_HUMAN	9	8	470.06	6.32694e-07	0.000228198	2.10414	1	Probe	Competition	P26373	60S ribosomal protein L13 (Breast basic conserved protein 1) (Large ribosomal subunit protein eL13)	RPL13 BBC1 OK/SW-cl.46
P08621|RU17_HUMAN;M0QYR1|M0QYR1_HUMAN;M0QX04|M0QX04_HUMAN	12	12	673.38	9.77975e-06	0.000373769	2.09244	1	Probe	Competition	P08621	U1 small nuclear ribonucleoprotein 70 kDa (U1 snRNP 70 kDa) (U1-70K) (snRNP70)	SNRNP70 RNPU1Z RPU1 SNRP70 U1AP1
P26038|MOES_HUMAN;A0A2R8Y5S7|A0A2R8Y5S7_HUMAN;V9GZ54|V9GZ54_HUMAN	17	11	594.52	5.96129e-05	0.000941806	2.05766	0.999989	Probe	Competition	P26038	Moesin (Membrane-organizing extension spike protein)	MSN
